# Supplementary material for: Thiazide and other Cl-benzenesulfonamide-bearing clinical drug affinities for human carbonic anhydrases
Source: PubMed Central journal article supplement (PMC8224972; doi:10.1371/journal.pone.0253608), 2021-06-24
Supplement: pone.0253608.s001.pdf [file pone.0253608.s001.pdf]

## S1 File:

# Thiazide and other Cl-benzenesulfonamide-bearing clinical drug affinities for human carbonic anhydrases

Lina Baranauskiene<sup>1</sup>, Lina Škiudaitė<sup>1,2</sup>, Vilma Michailovienė<sup>1</sup>, Vytautas Petrauskas<sup>1</sup>, Daumantas Matulis<sup>1,\*</sup>

1 Department of Biothermodynamics and Drug Design, Institute of Biotechnology, Life Sciences Center, Vilnius University. Address: Saulėtekio 7, Vilnius, Lithuania

2 Pharmacy Center, Institute of Biomedical Science, Faculty of Medicine, Vilnius University. Address: M. K. Čiurlionio 21/27, Vilnius, Lithuania

\*Correspondence:

Prof. Daumantas Matulis, Department of Biothermodynamics and Drug Design, Institute of Biotechnology, Life Sciences Center, Vilnius University. Address: Saulėtekio 7, Vilnius, LT-10257, Lithuania

Email: [daumantas.matulis@bti.vu.lt](mailto:daumantas.matulis@bti.vu.lt)

## Contents:

|                                                                                   |    |
|-----------------------------------------------------------------------------------|----|
| Compounds used in this study .....                                                | 2  |
| 1. 2-chlorobenzenesulfonamide .....                                               | 3  |
| 2. Dichorphenamide.....                                                           | 7  |
| 3. Chlorothiazide .....                                                           | 12 |
| 4. Hydrochlorothiazide.....                                                       | 18 |
| 5. Trichloromethiazide .....                                                      | 24 |
| 6. Cyclothiazide .....                                                            | 28 |
| 7. Polythiazide .....                                                             | 32 |
| 8. Benzthiazide .....                                                             | 36 |
| 9. Athiazide .....                                                                | 41 |
| 10. Hydroflumethiazide .....                                                      | 46 |
| 11. Bendroflumethiazide .....                                                     | 50 |
| 12. Indapamide .....                                                              | 55 |
| 13. Clopamide .....                                                               | 61 |
| 14. Xipamide .....                                                                | 66 |
| 15. Furosemide .....                                                              | 70 |
| 16. Chlorthalidone .....                                                          | 74 |
| 17. Clorexolone .....                                                             | 80 |
| 18. Quinethazone.....                                                             | 84 |
| 19. Fenquizone.....                                                               | 88 |
| 20. Metolazone .....                                                              | 92 |
| Equations used to fit the fluorescence-based thermal shift assay (FTSA) data..... | 96 |
| Equation used to fit stopped-flow enzymatic inhibition assay (SFA) data .....     | 98 |
| References .....                                                                  | 98 |

## Compounds used in this study

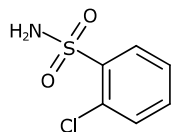

**1** 2-chlorobenzenesulfonamide

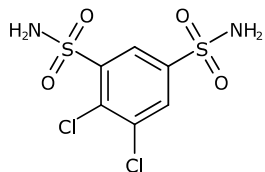

**2** dichlorophenamide

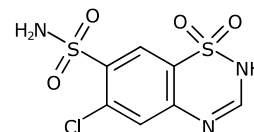

**3** chlorothiazide

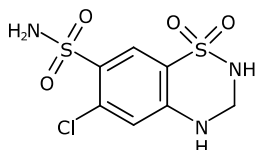

**4** hydrochlorothiazide

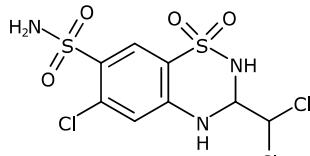

**5** trichloromethiazide

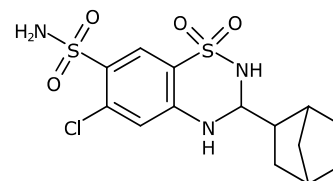

**6** cyclothiazide

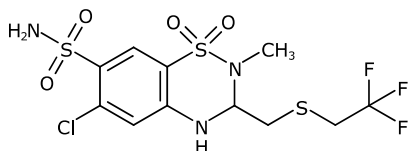

**7** polythiazide

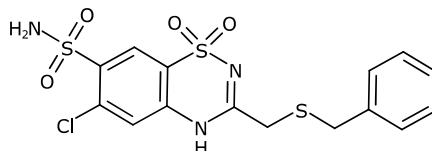

**8** benzthiazide

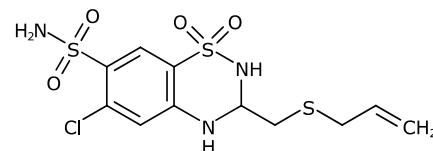

**9** althiazide

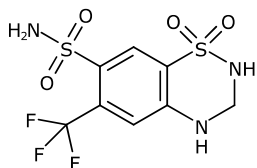

**10** hydroflumethiazide

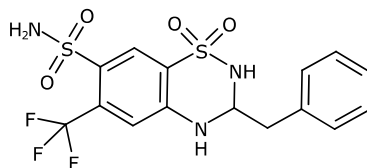

**11** bendroflumethiazide

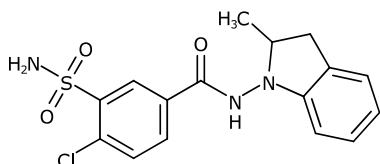

**12** indapamide

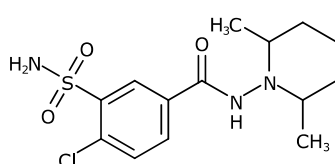

**13** clopamide

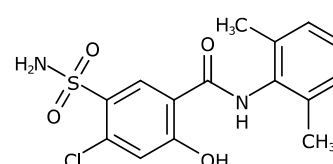

**14** xipamide

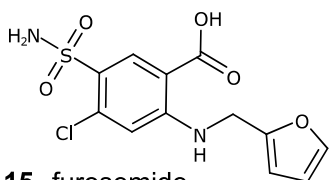

**15** furosemide

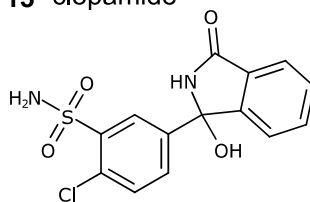

**16** chlorthalidone

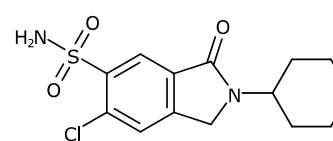

**17** clorexolone

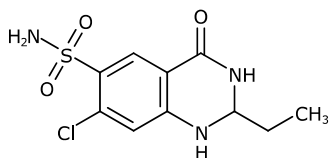

**18** quinethazone

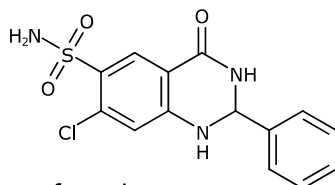

**19** fenquizone

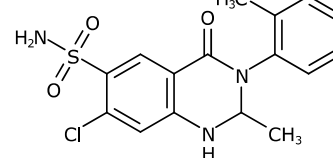

**20** metolazone

# 1. 2-chlorobenzenesulfonamide

## Fluorence-based thermal shift assay

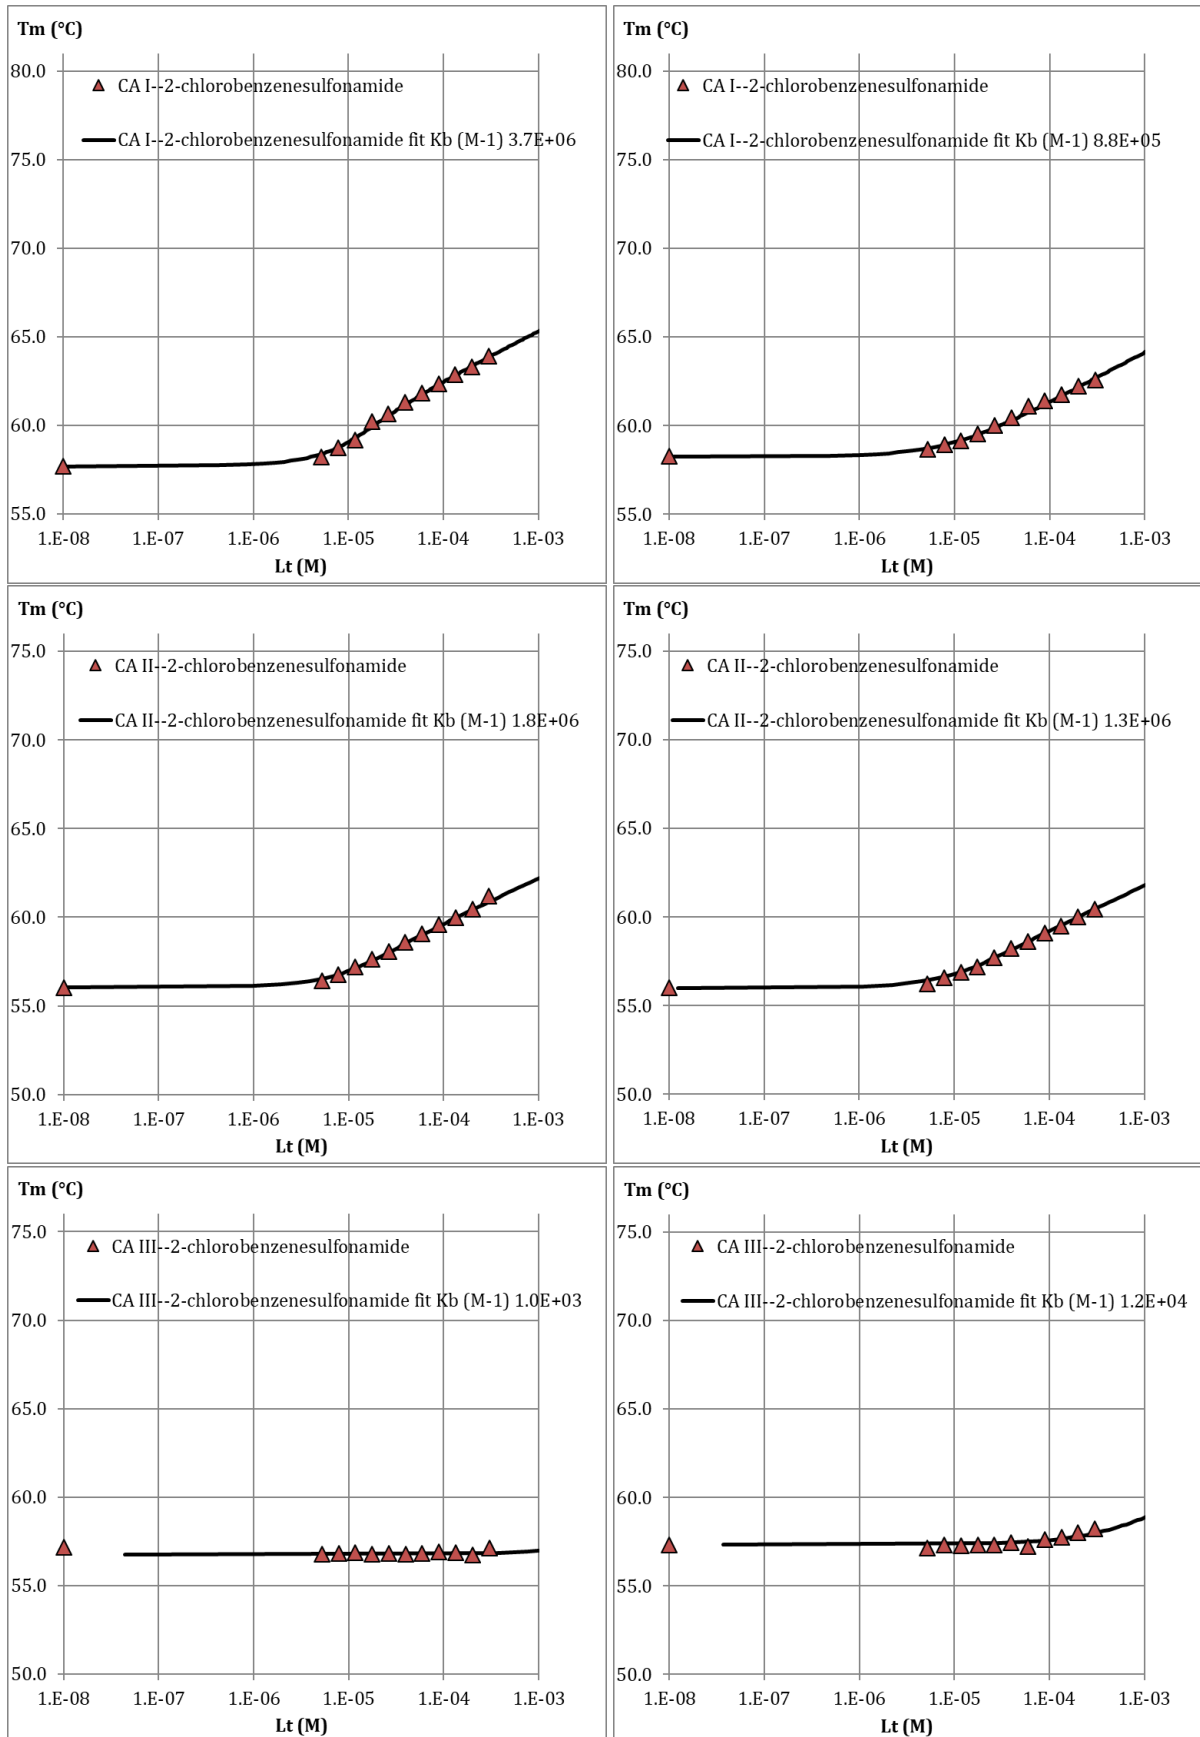

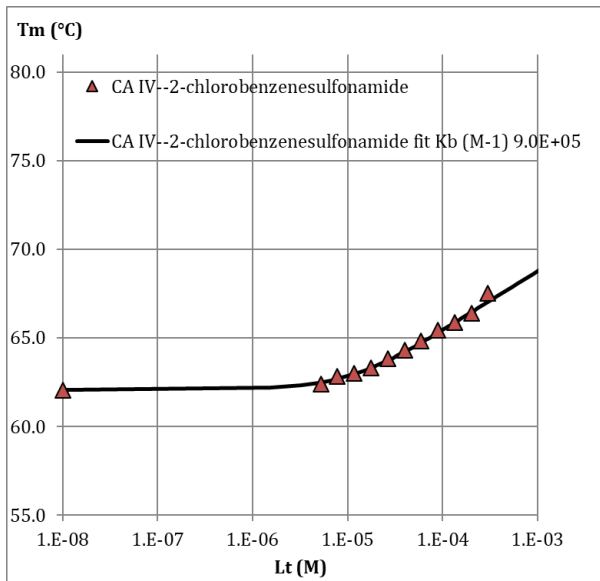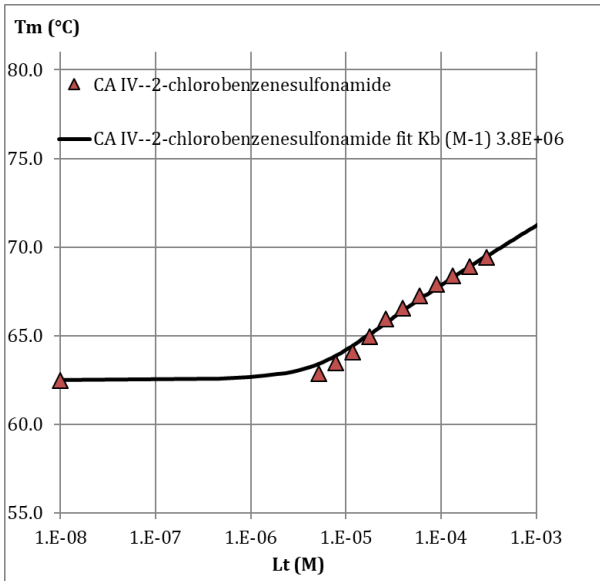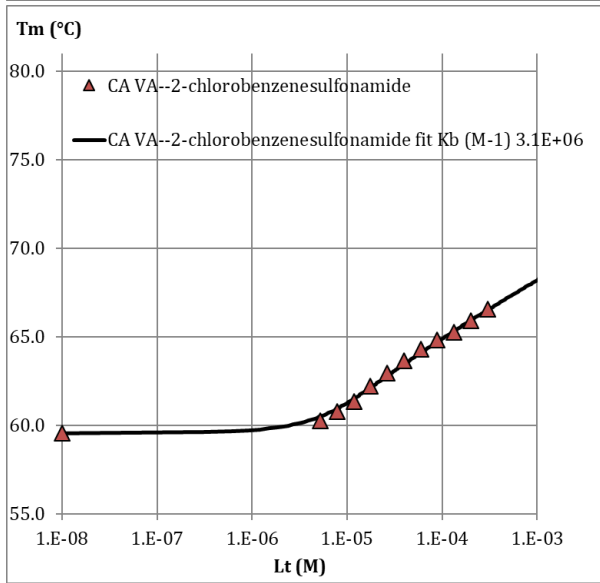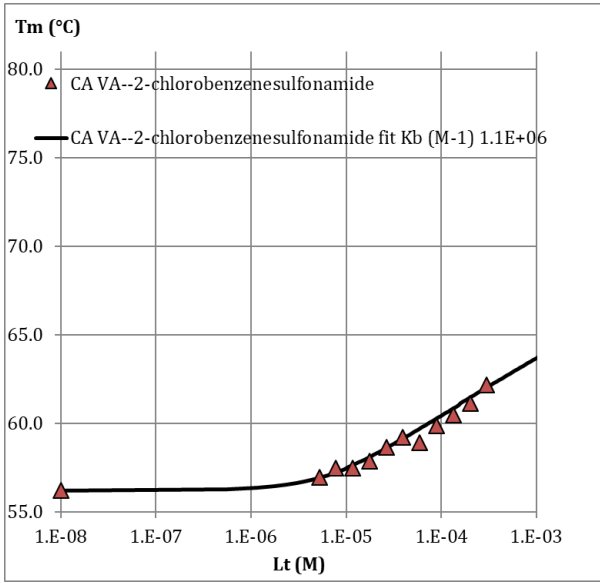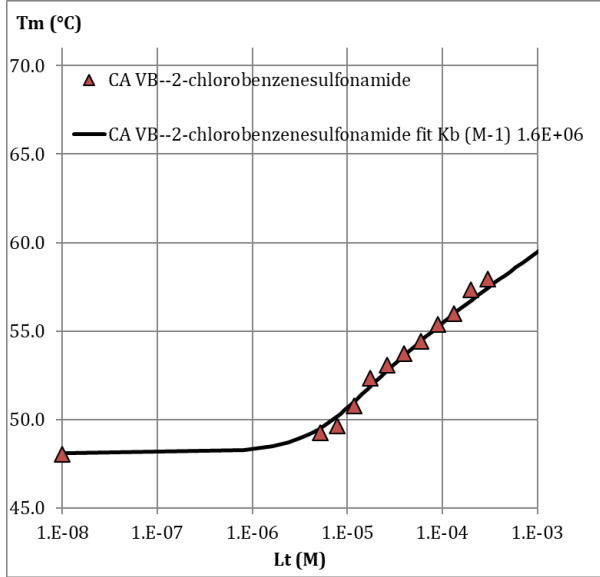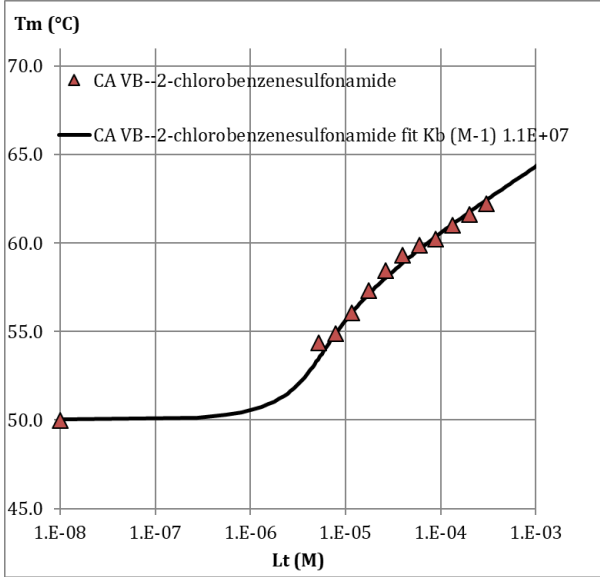



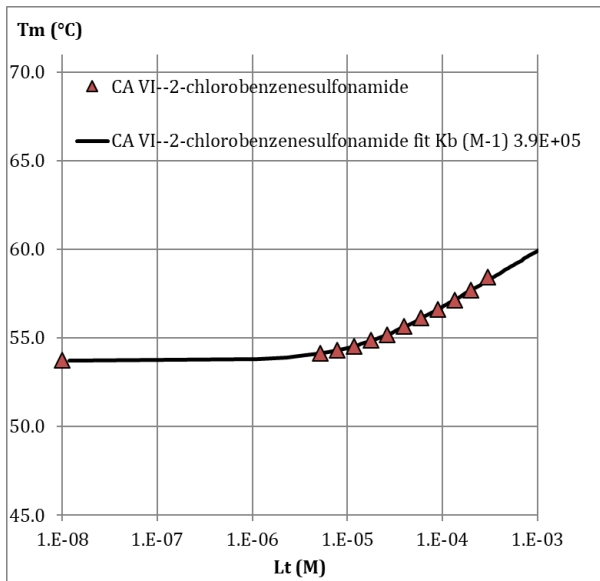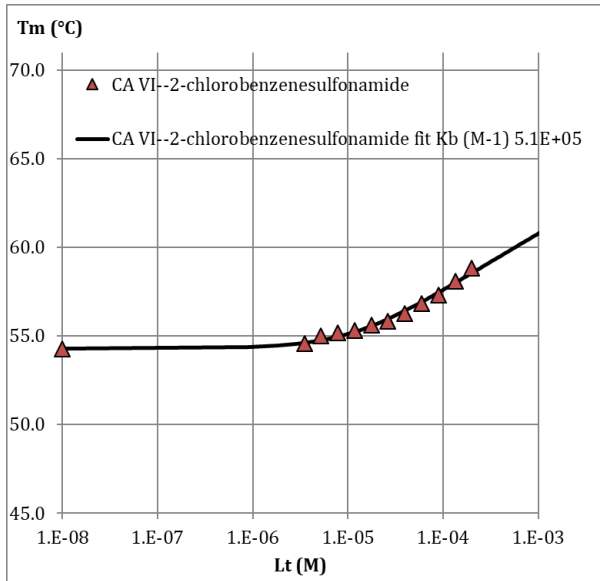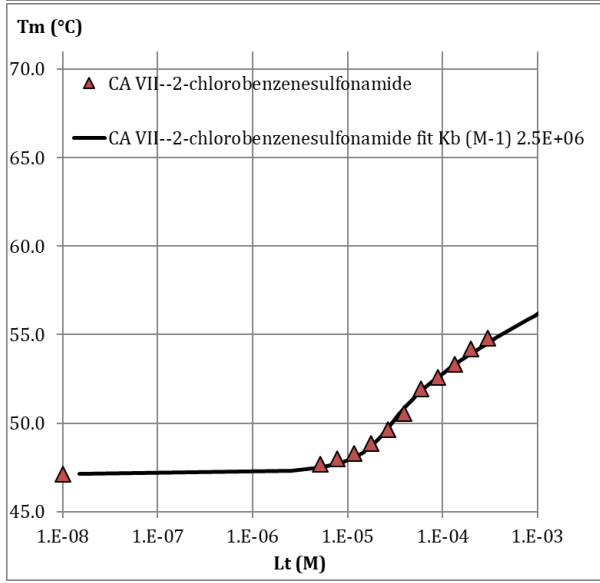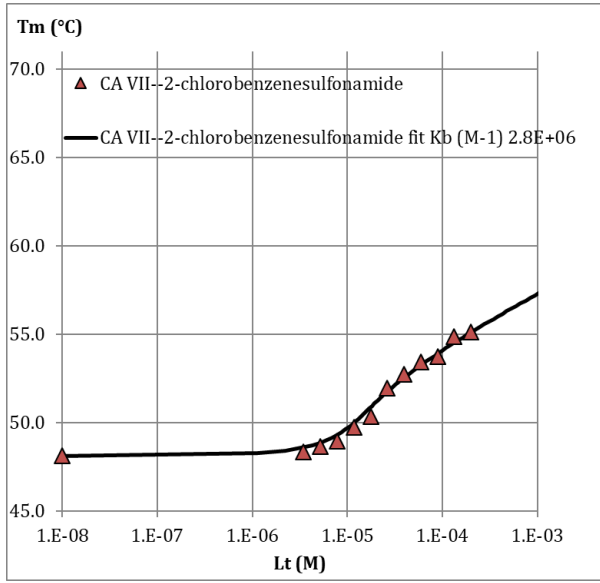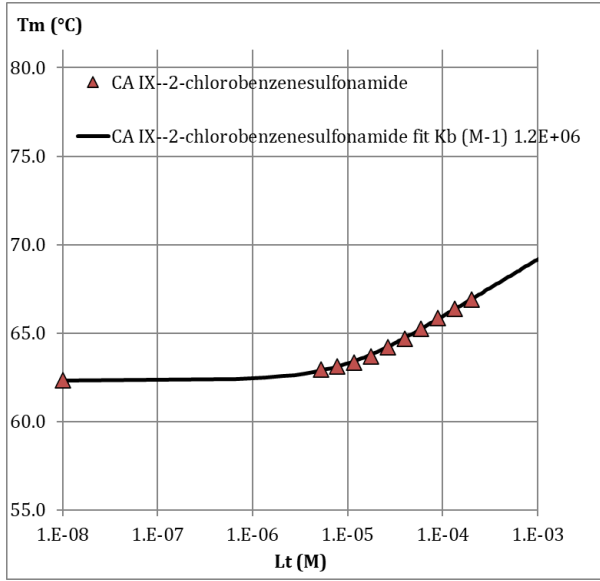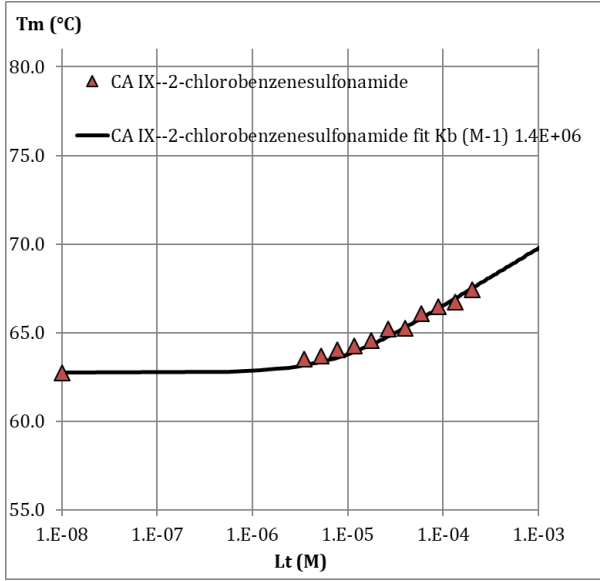

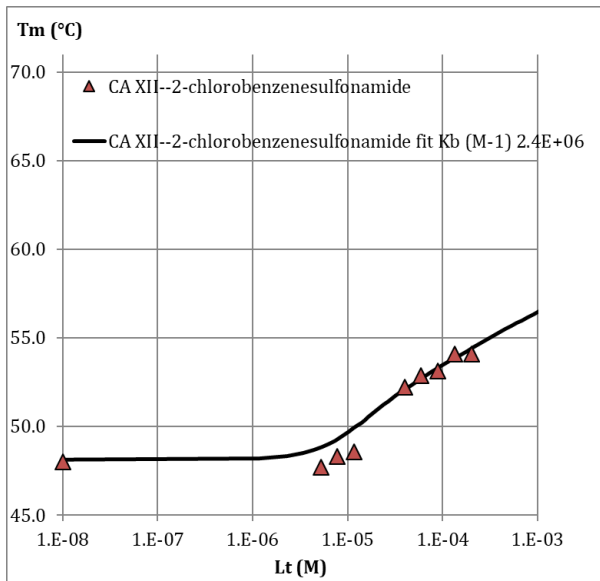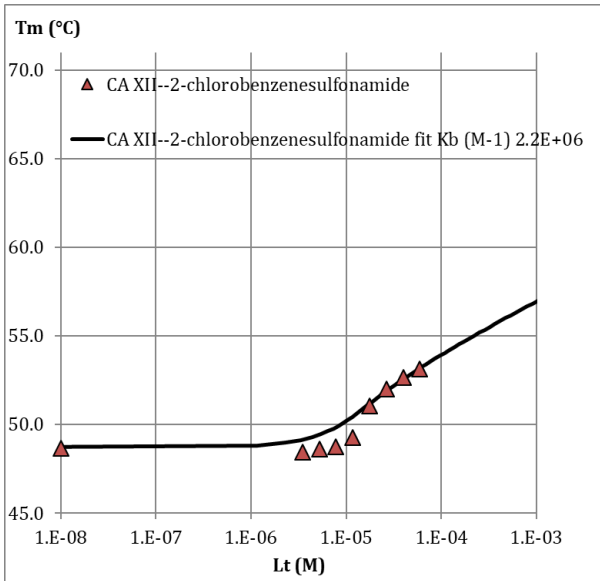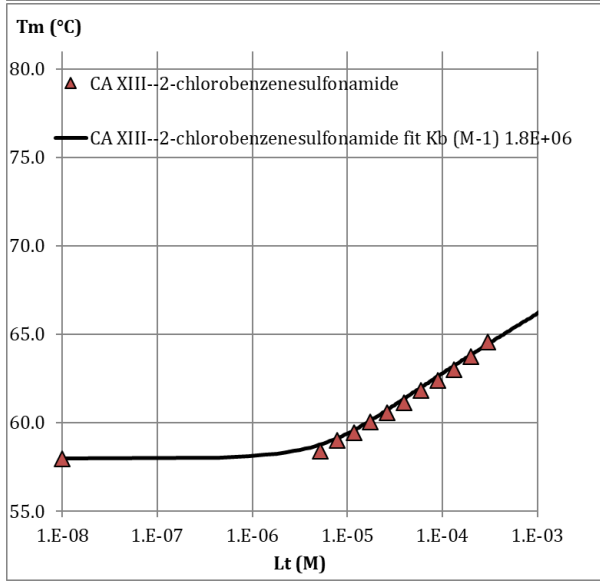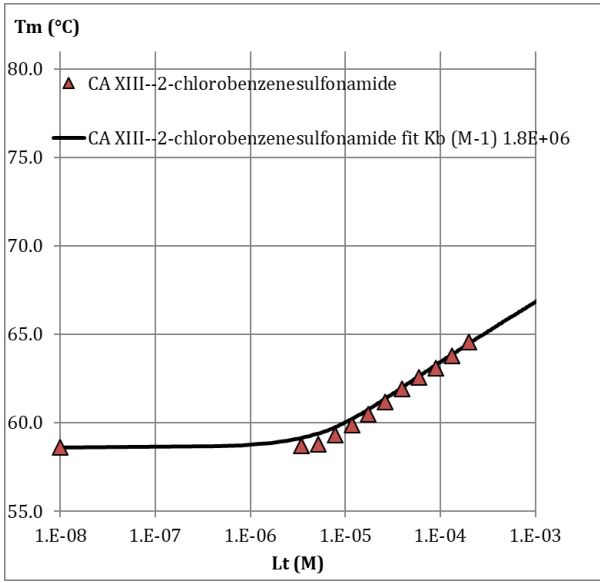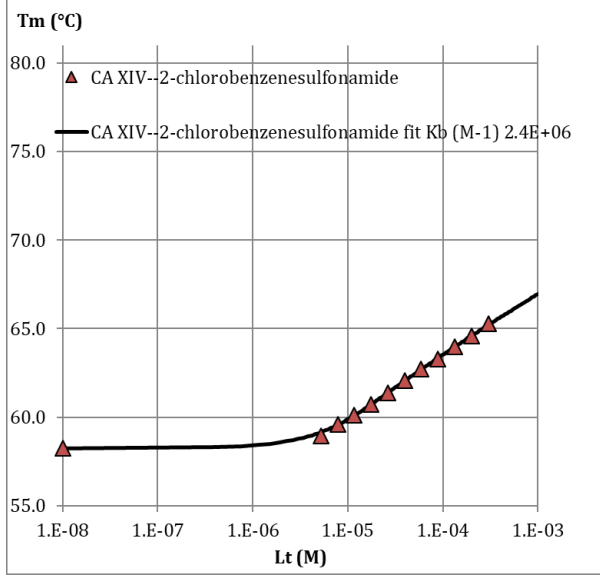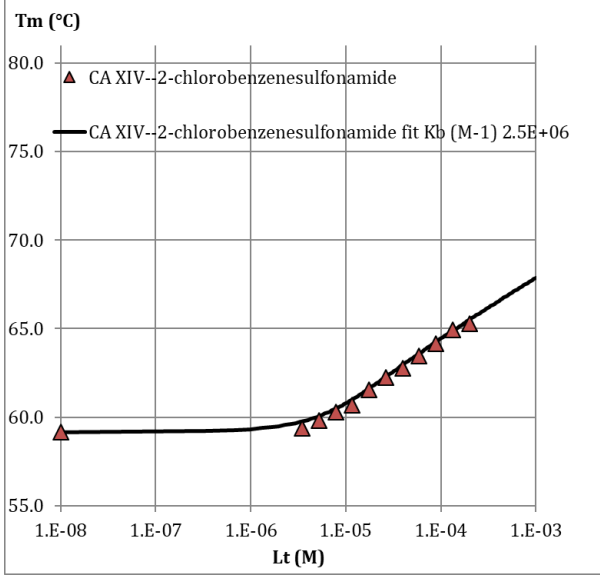

## 2. Dichlorphenamide

### Fluorence-based thermal shift assay

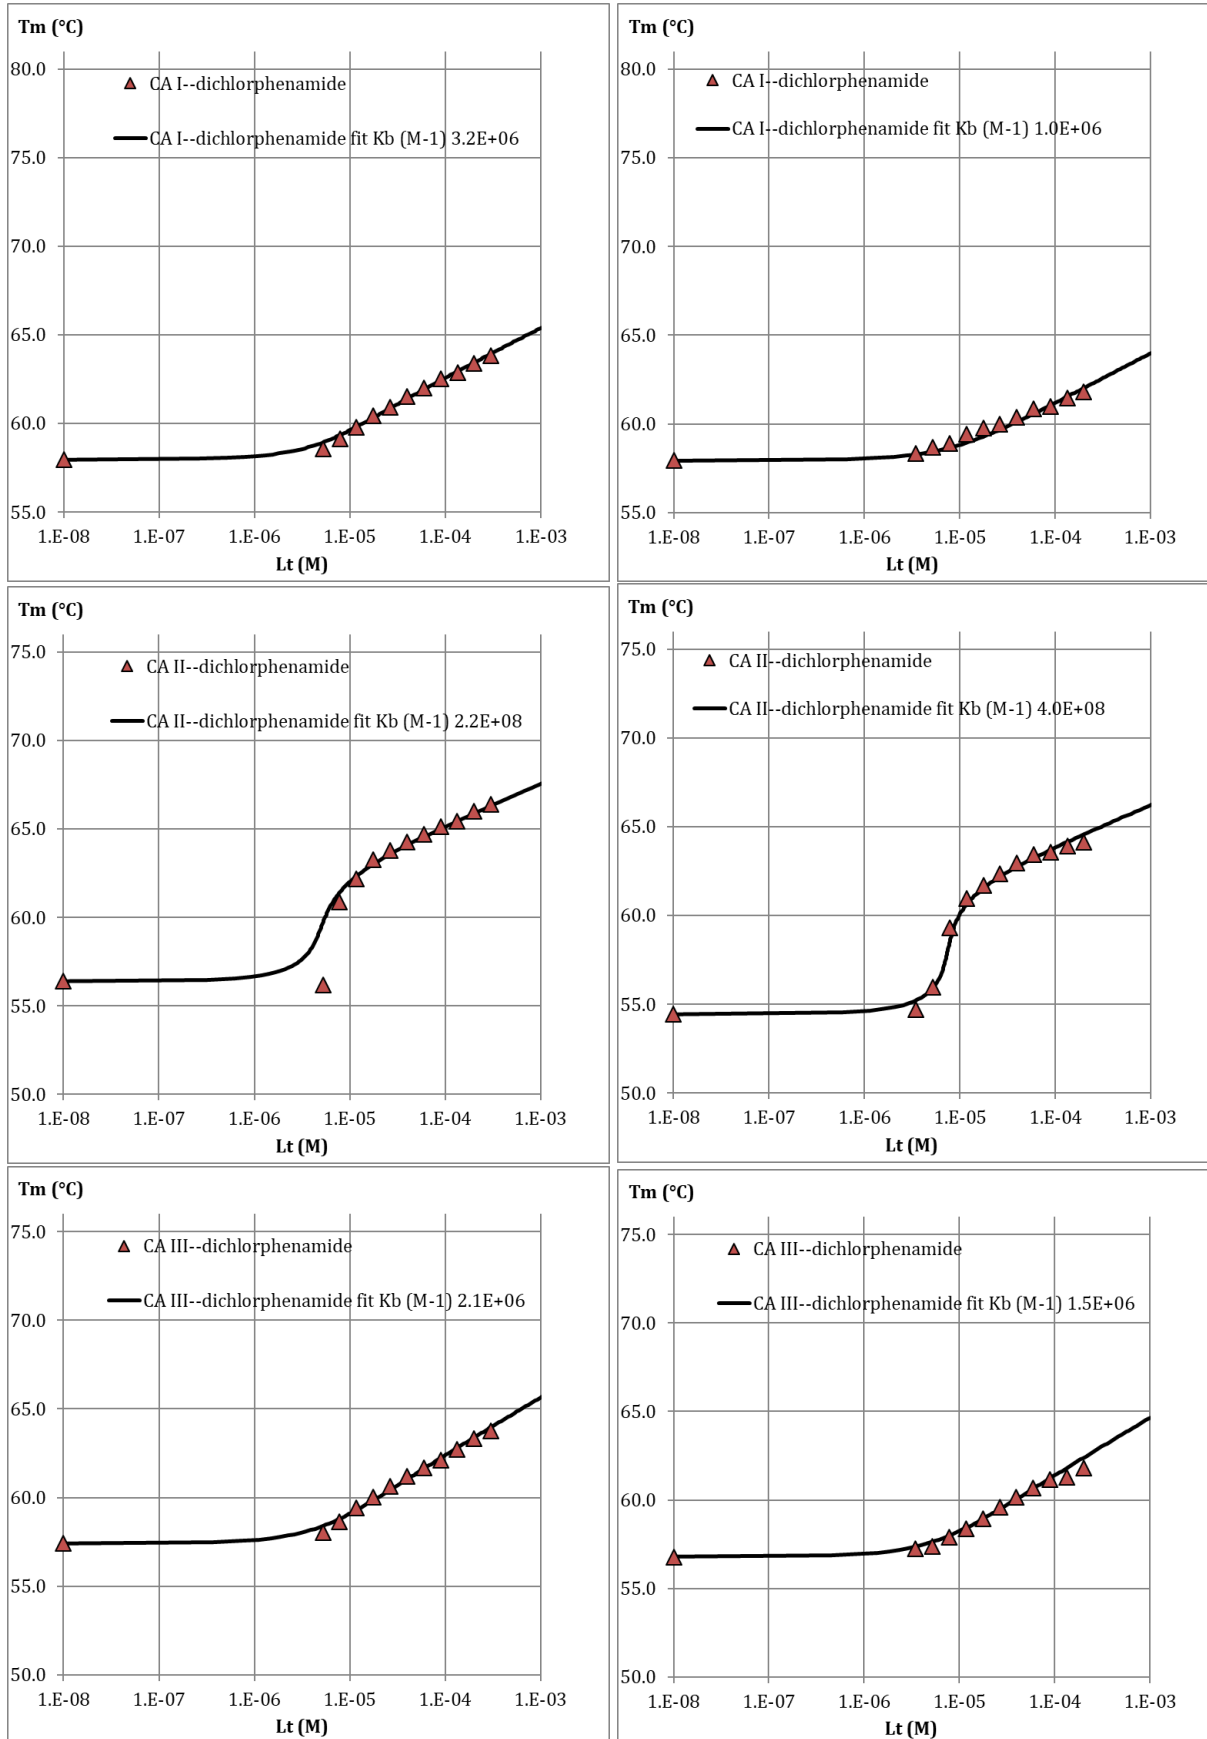

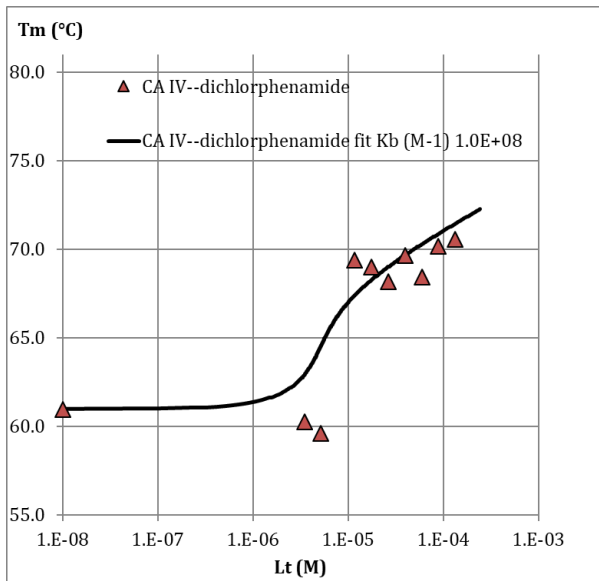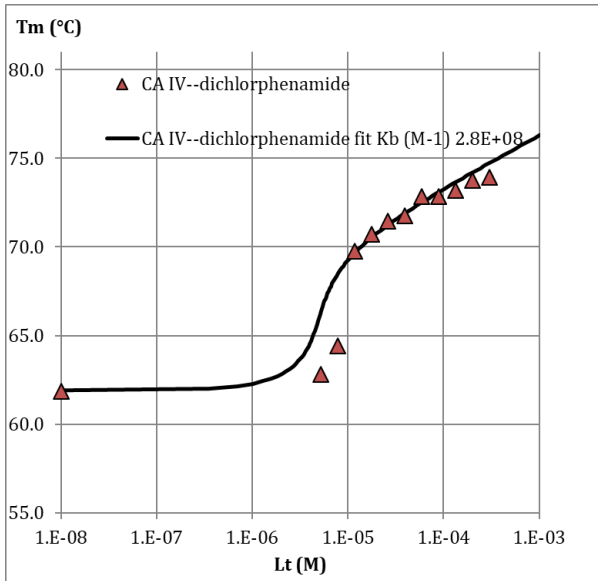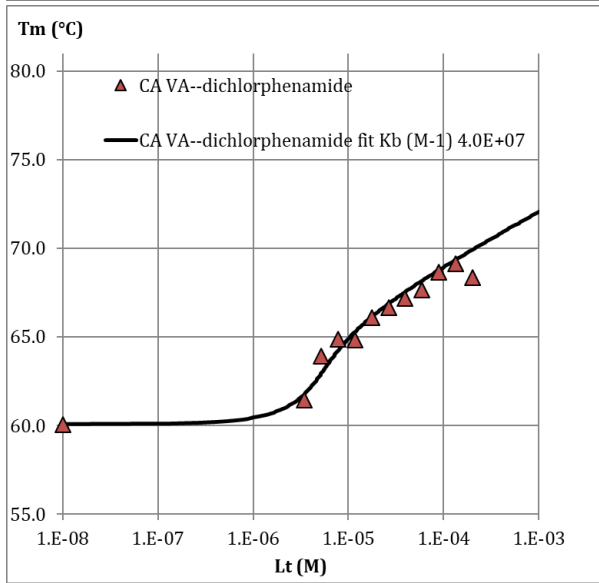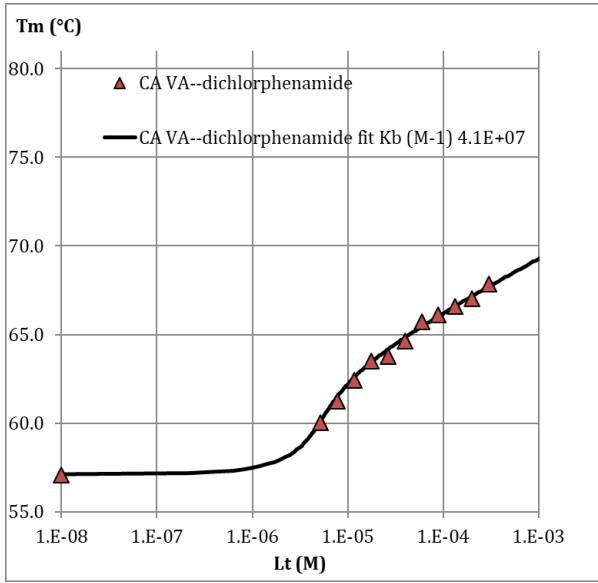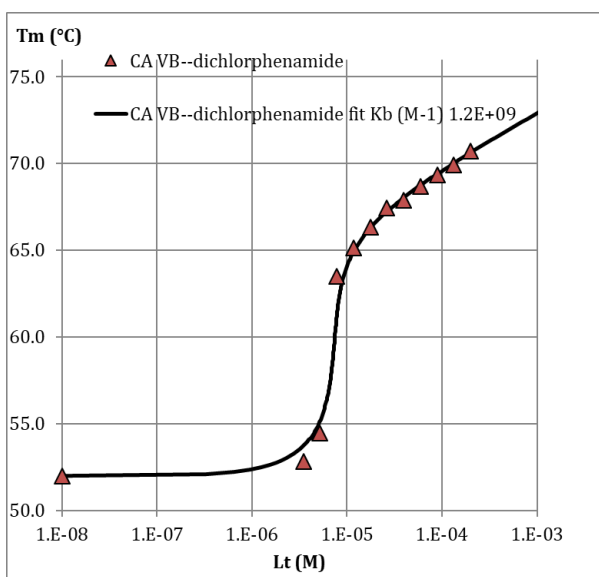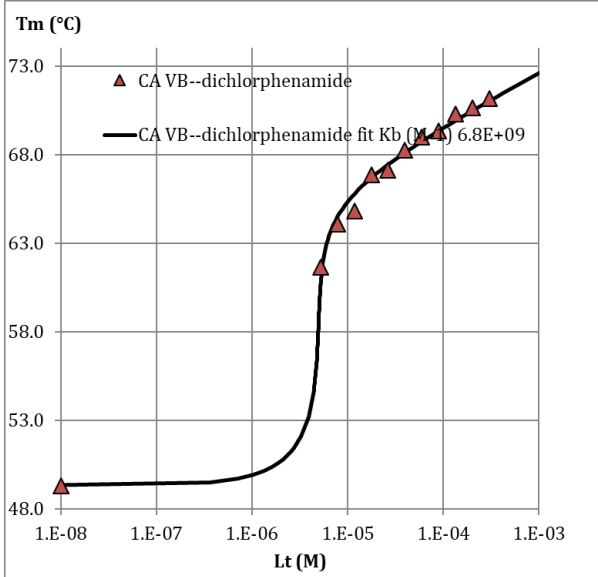

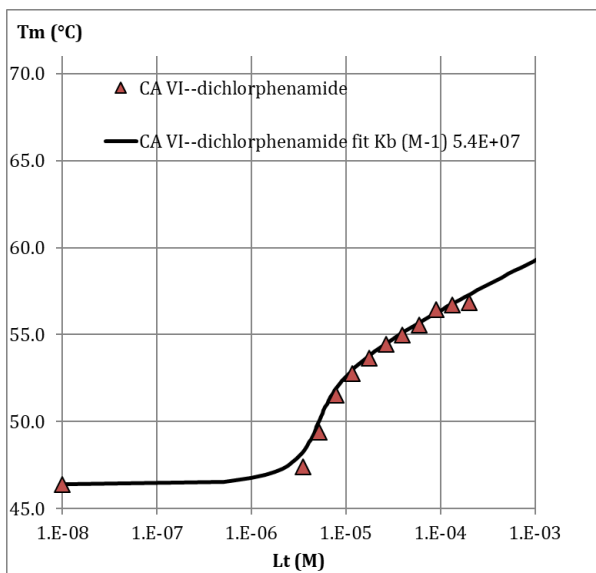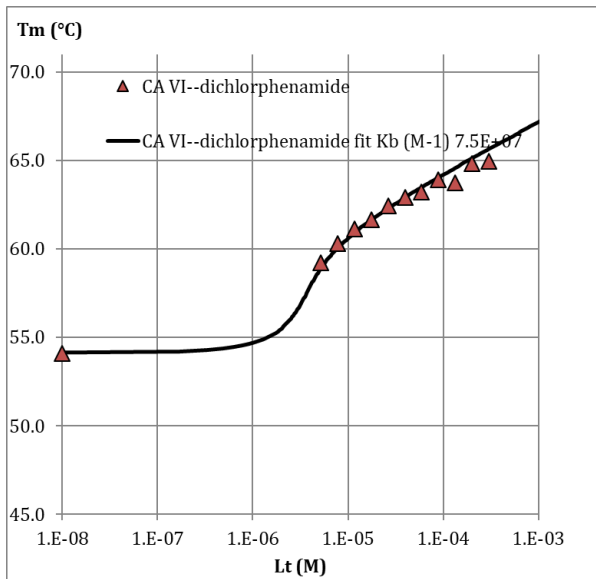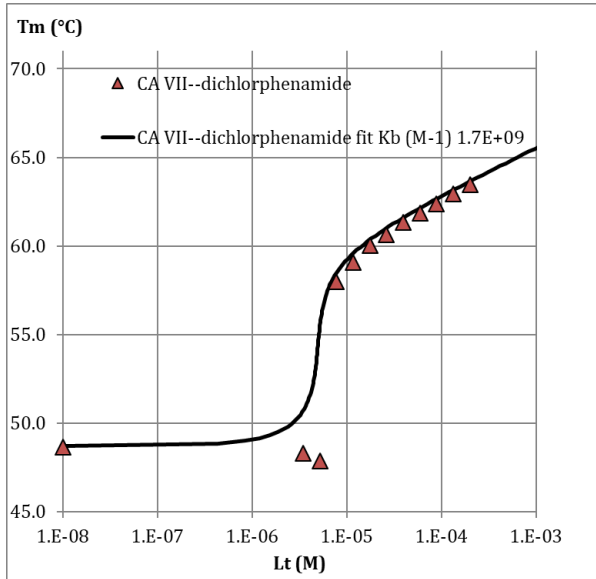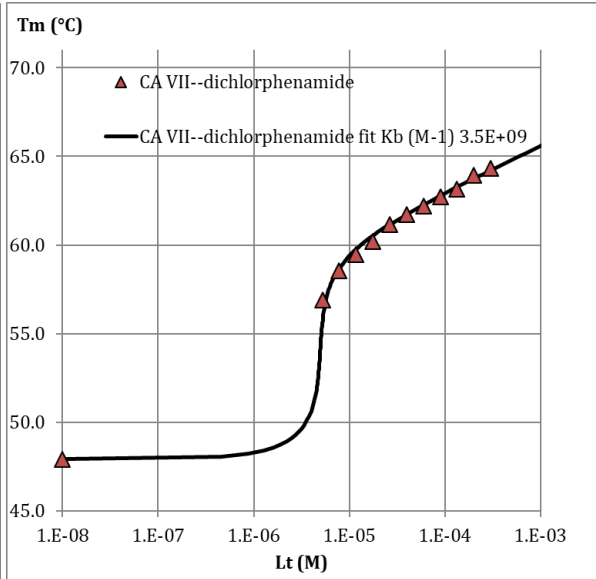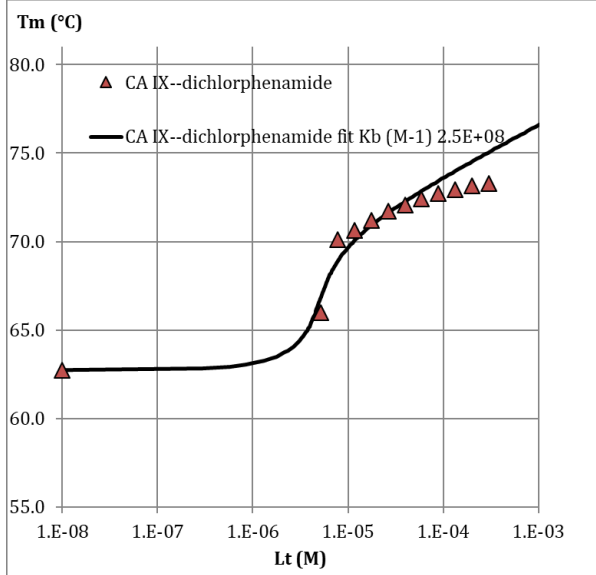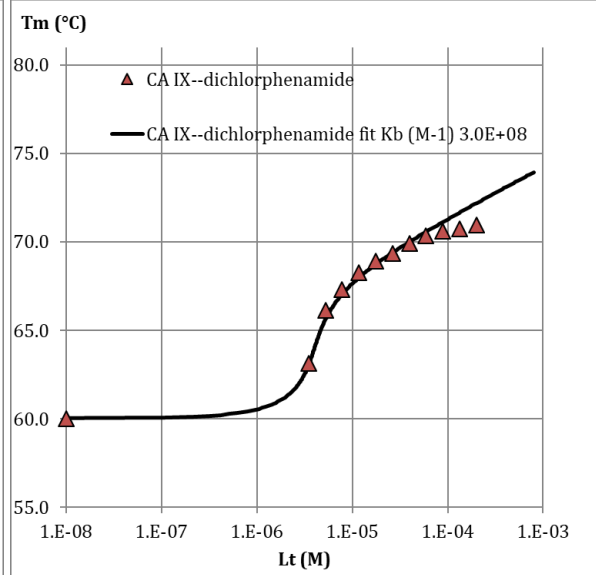

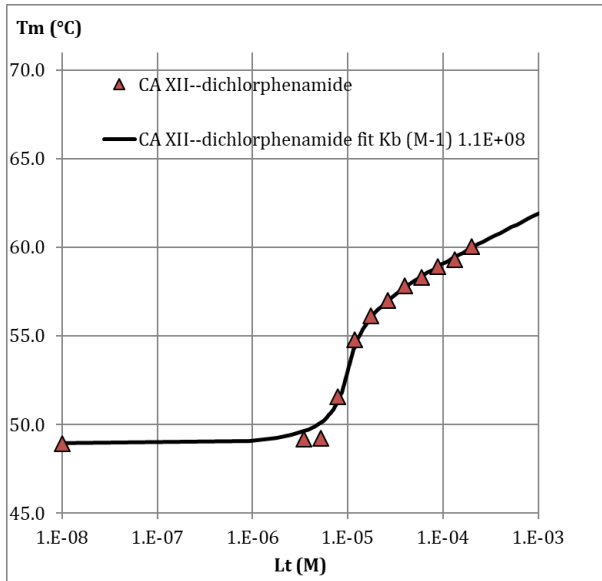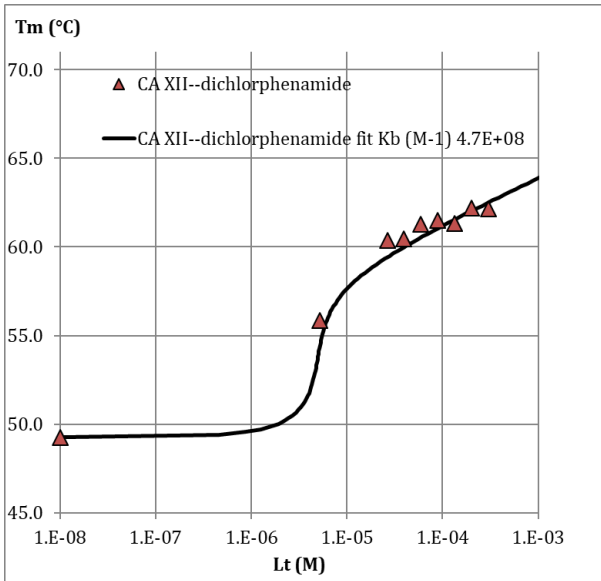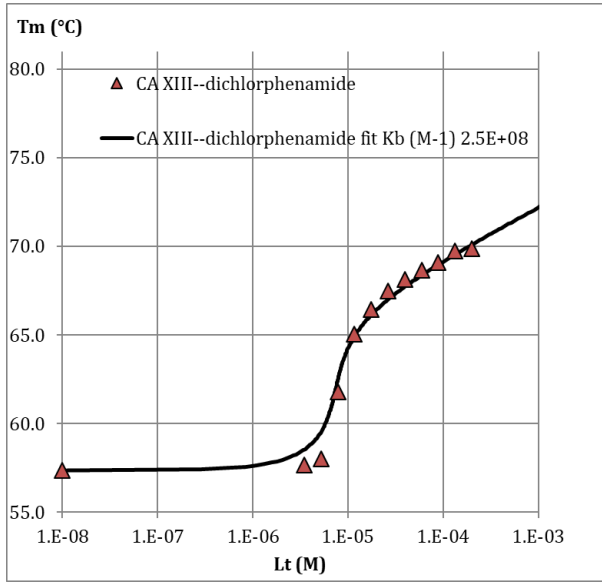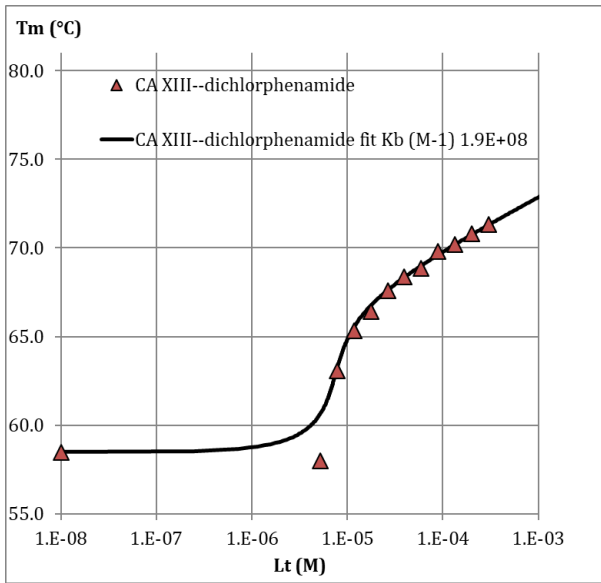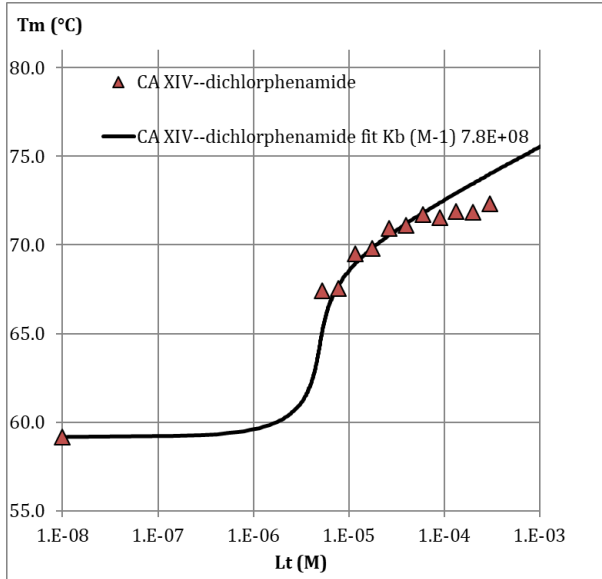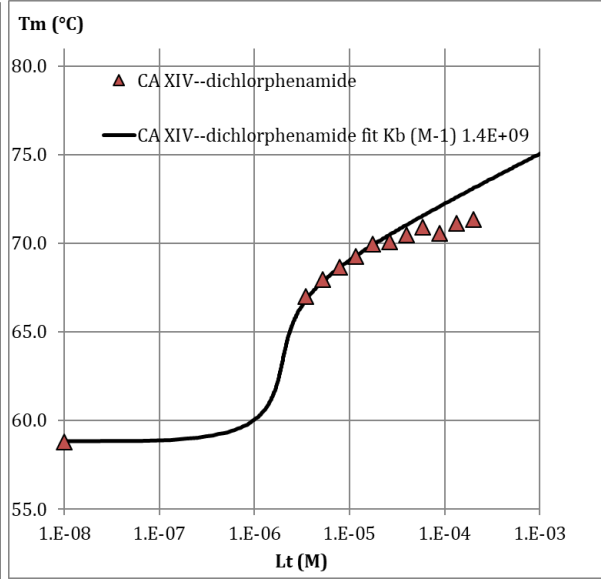

Isothermal titration calorimetry CAII –  
dichlorphenamide

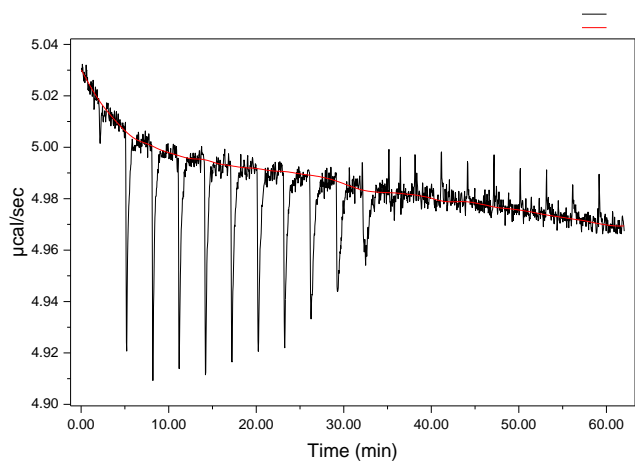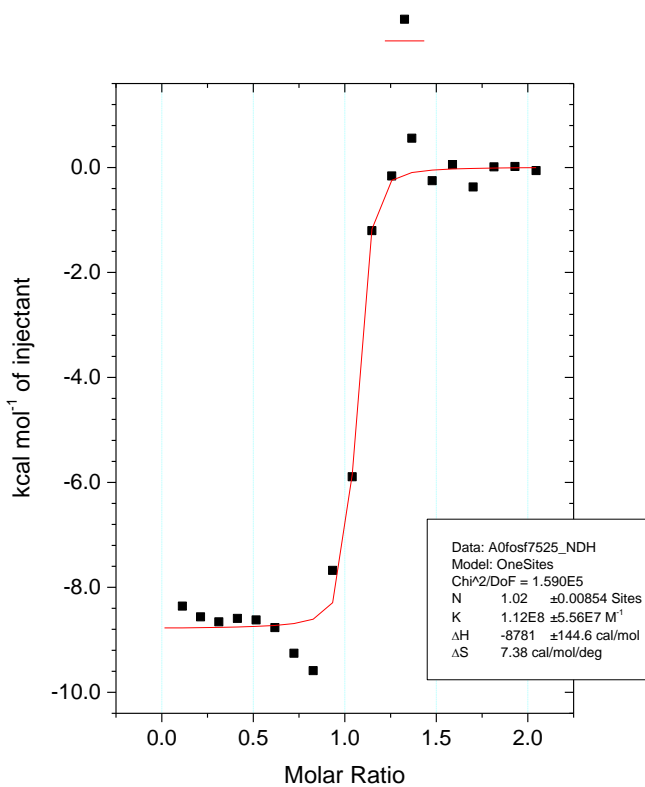

CAII – dichlorphenamide

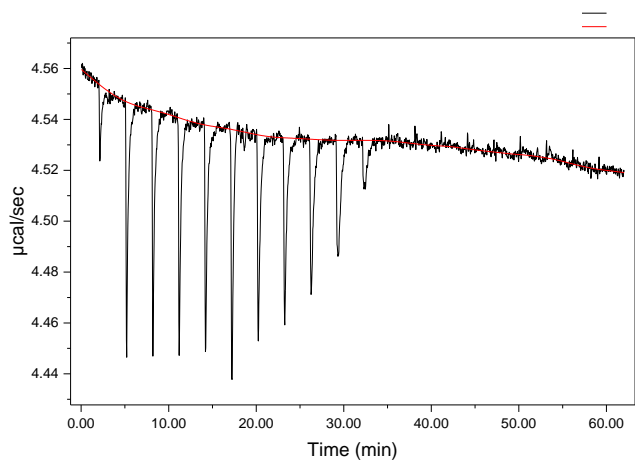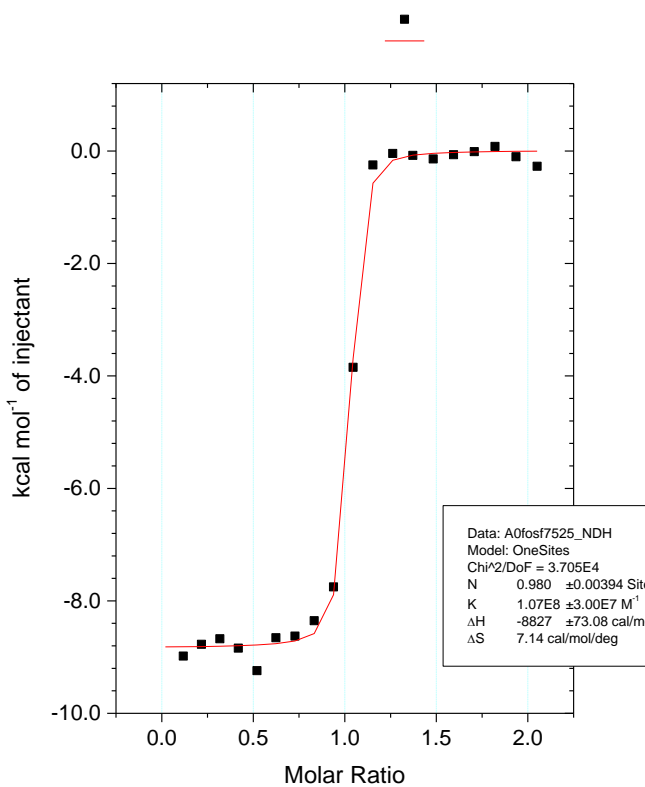

### 3. Chlorothiazide

#### Fluorescence-based thermal shift assay

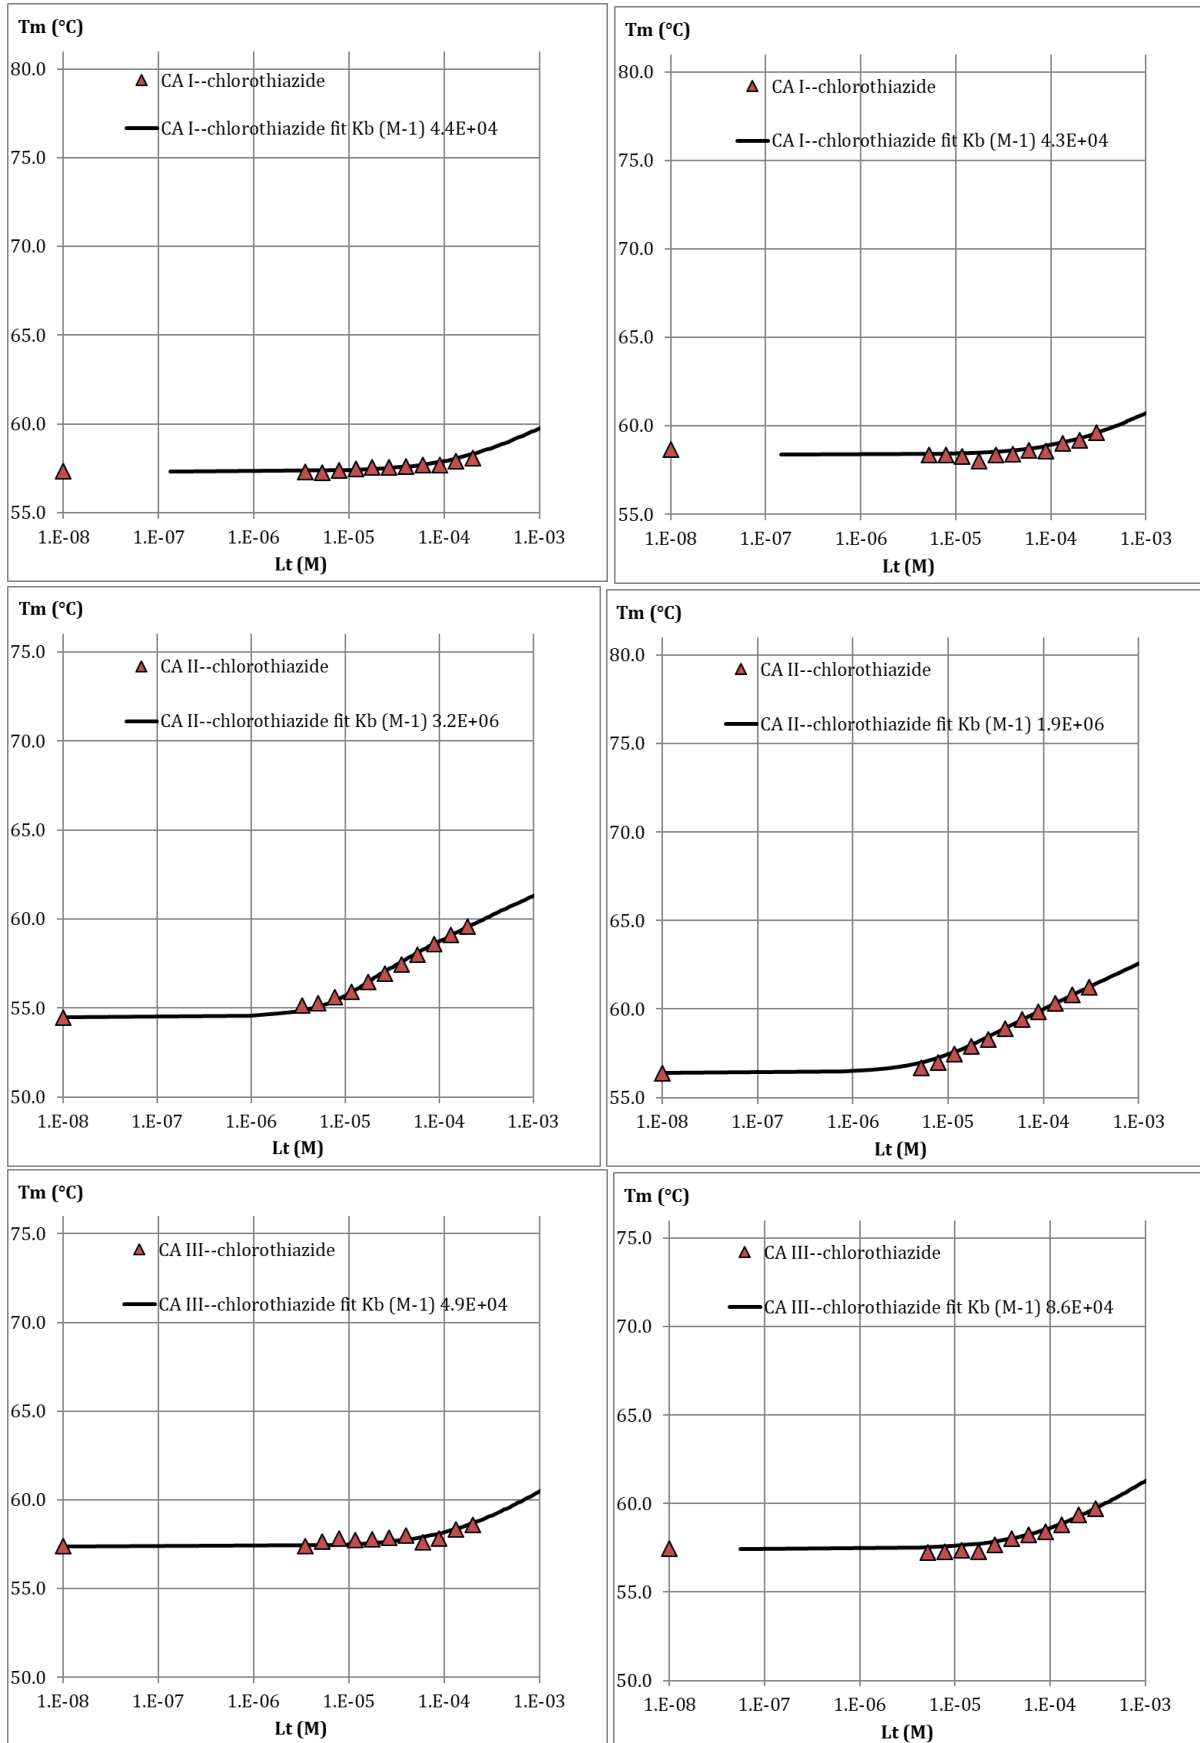



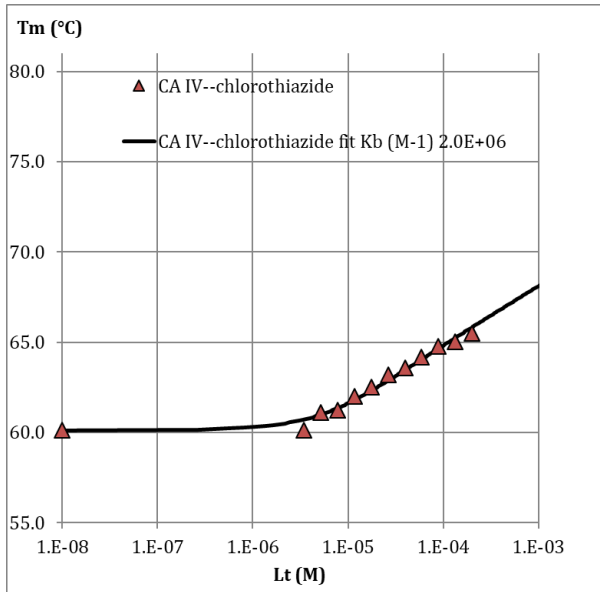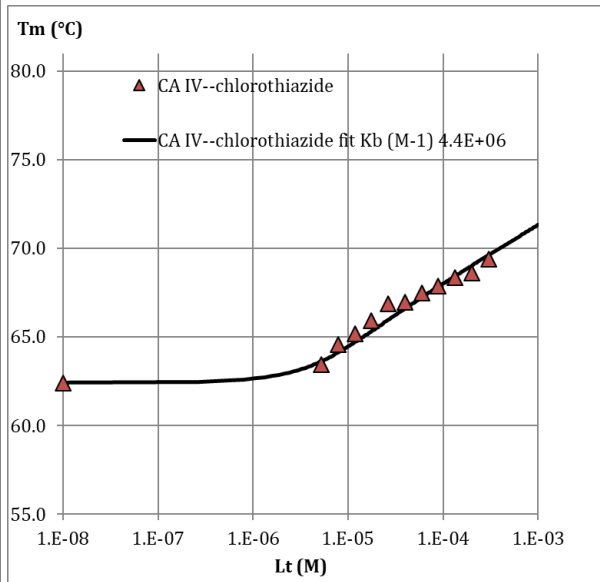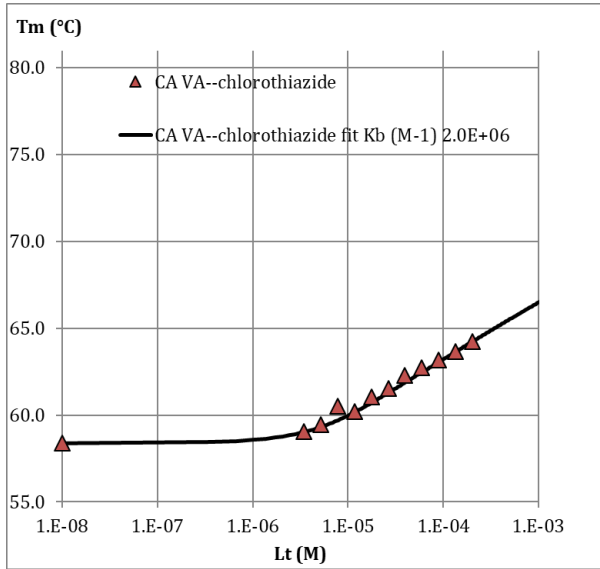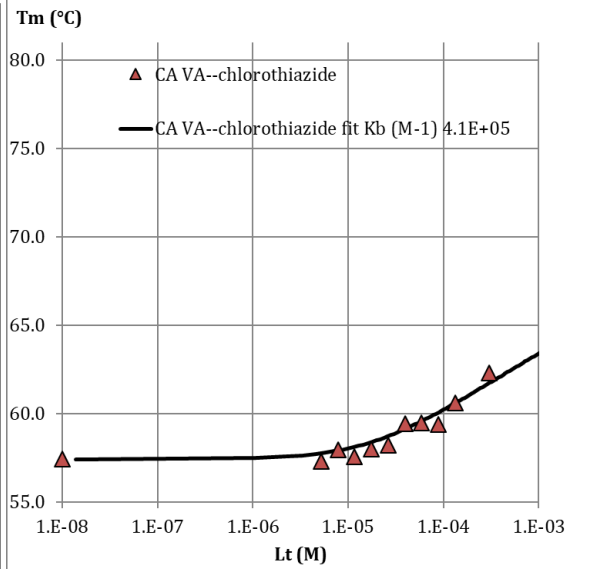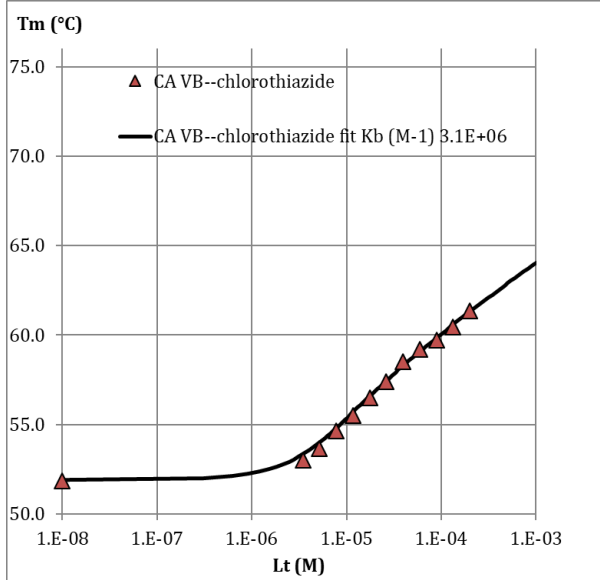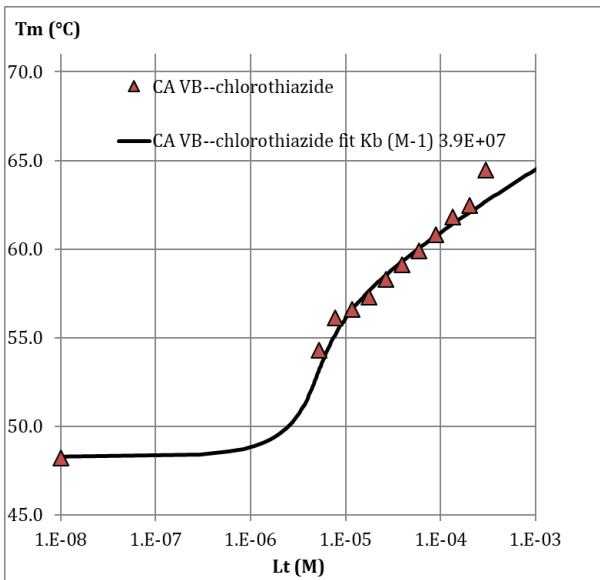

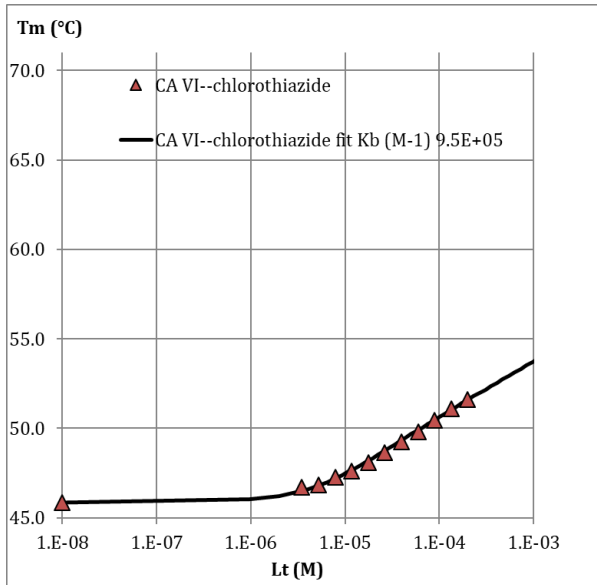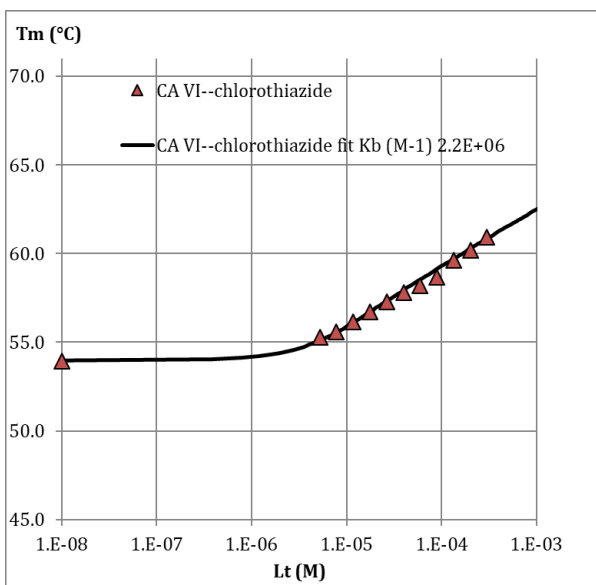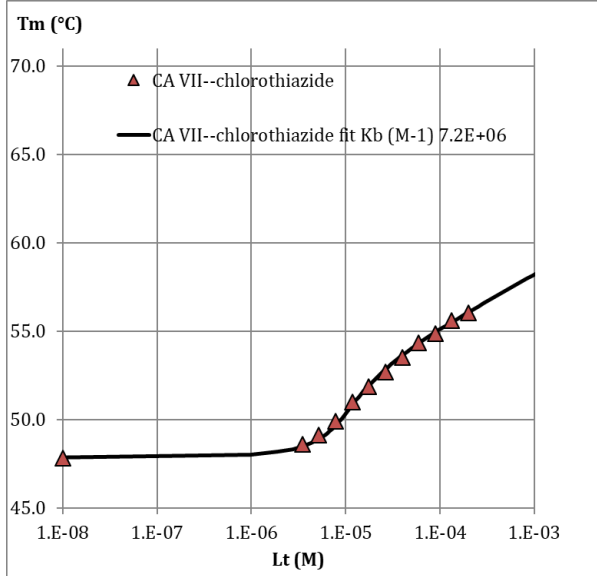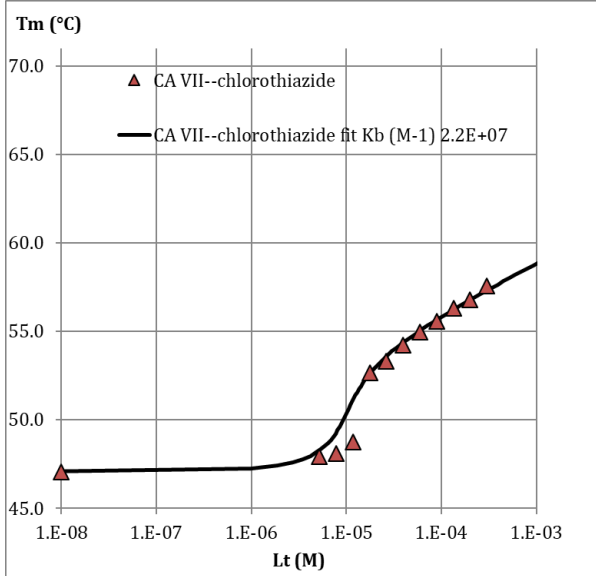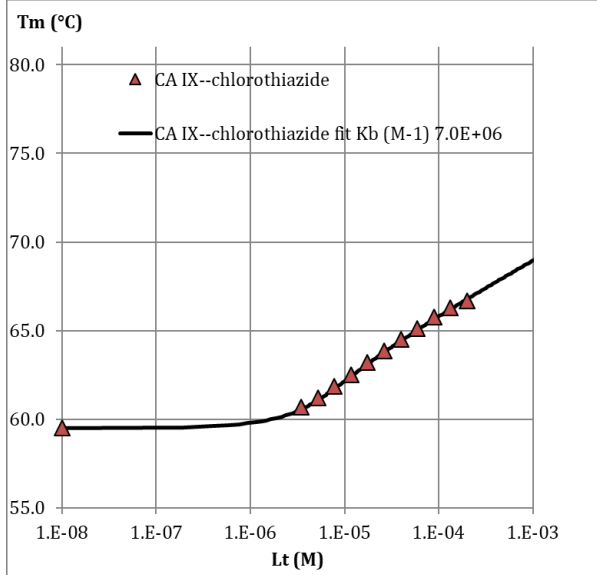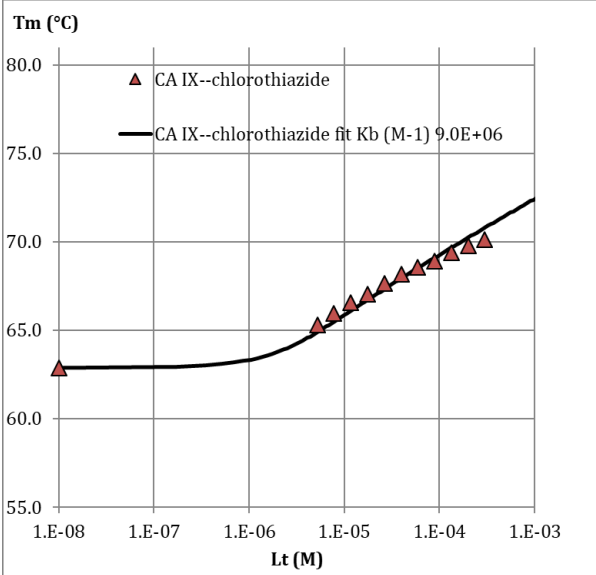

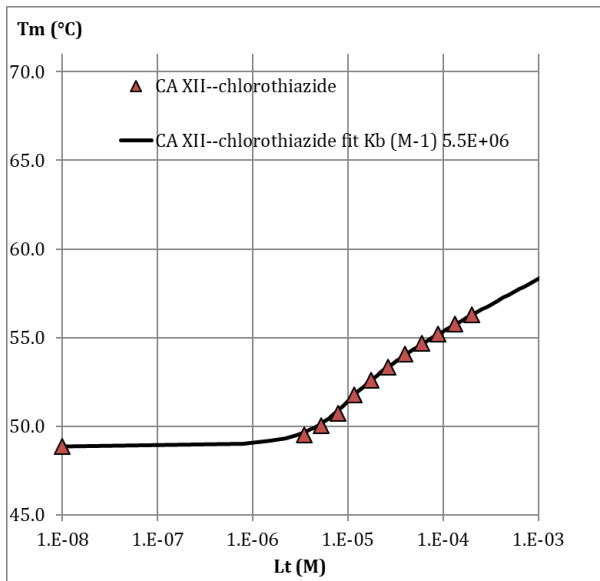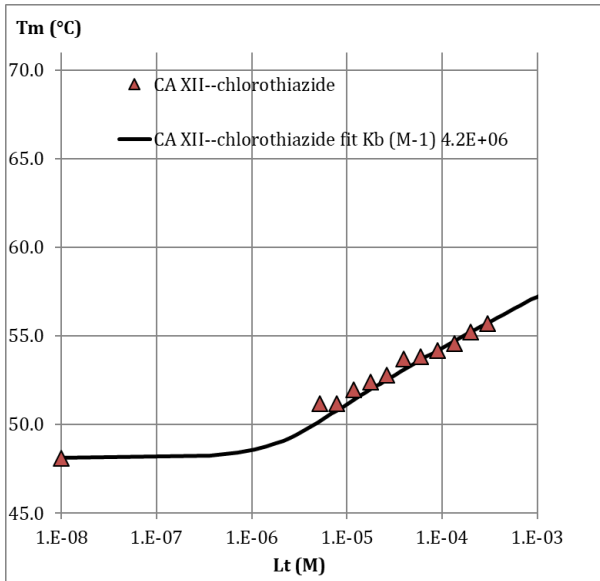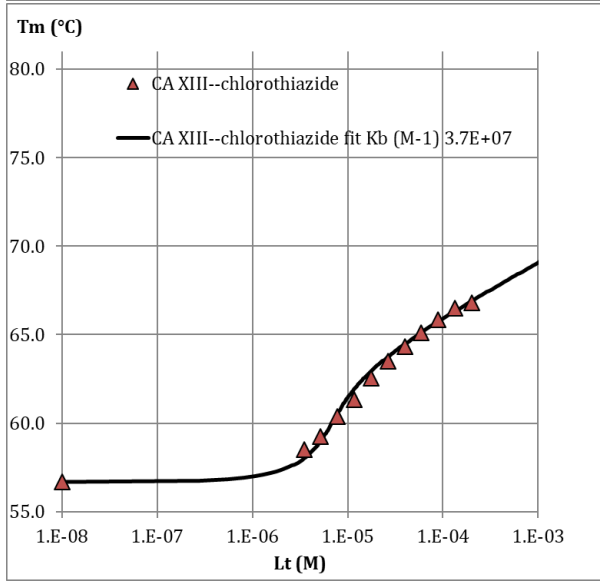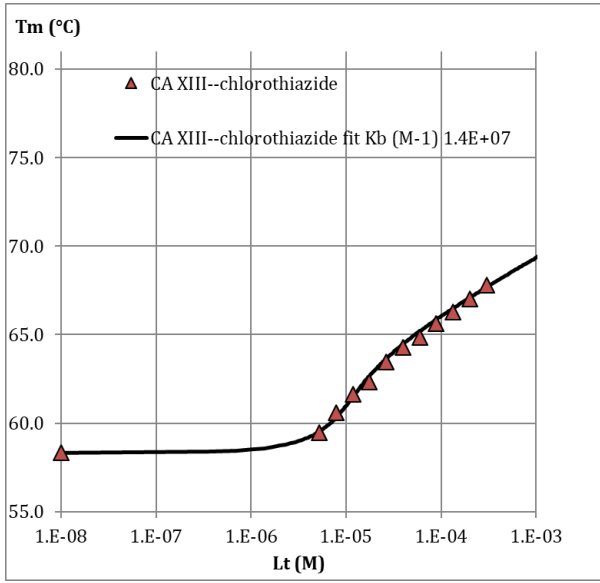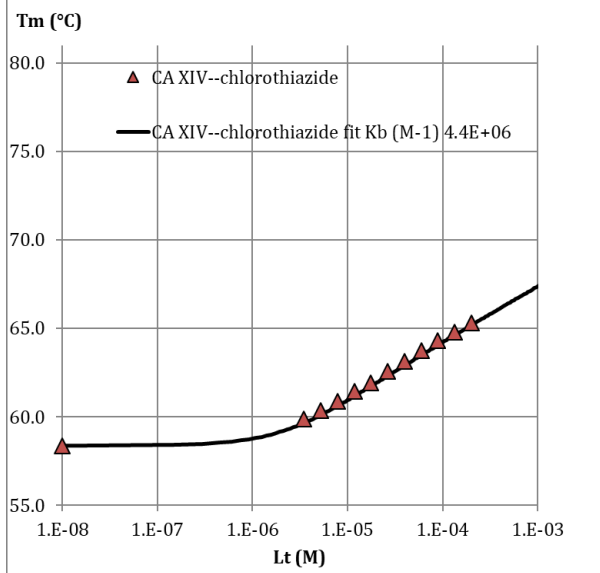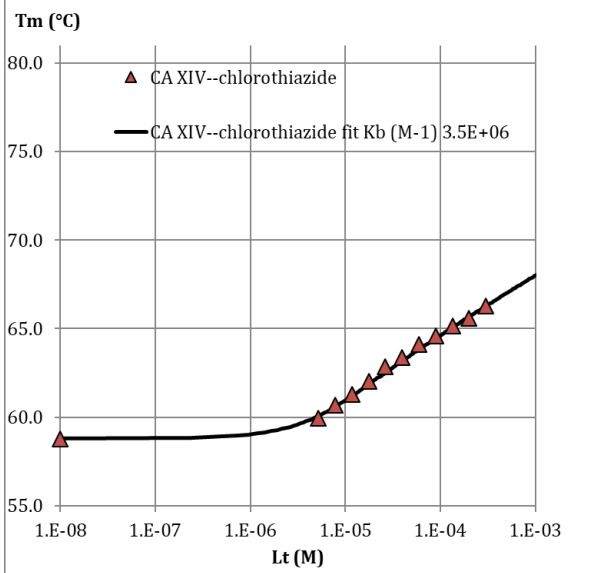

## CO<sub>2</sub> hydration activity inhibition:

### CA II - chlorothiazide

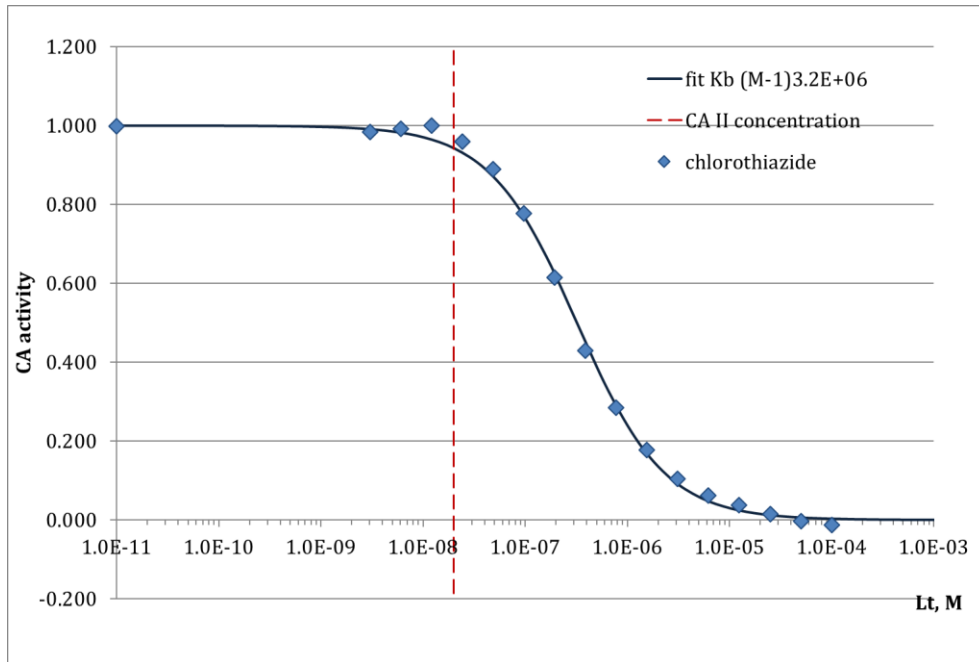

### CA IV - chlorothiazide

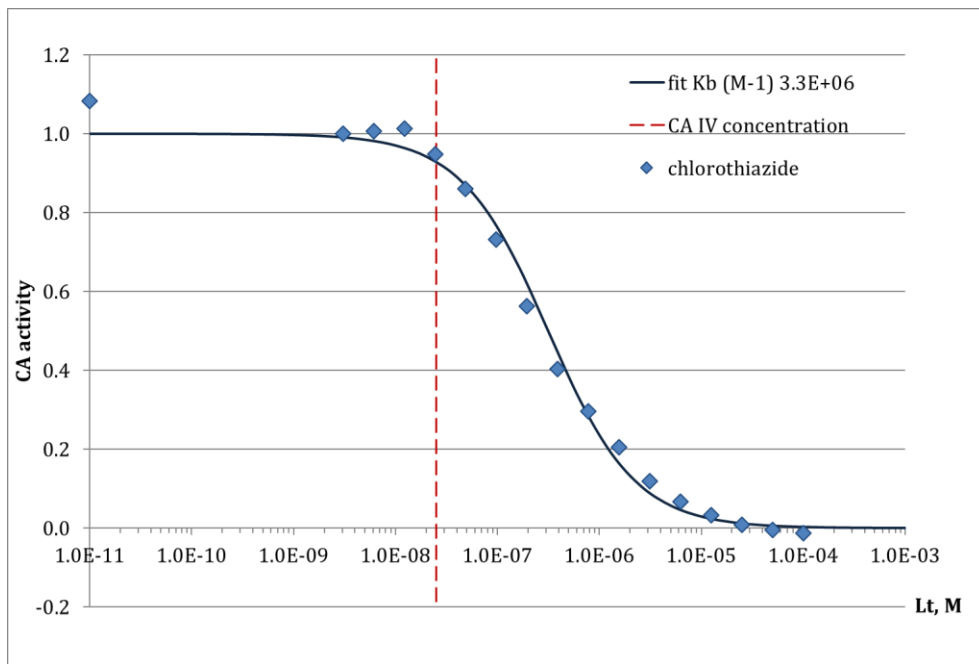

# Isothermal titration calorimetry

## CAII – chlorothiazide

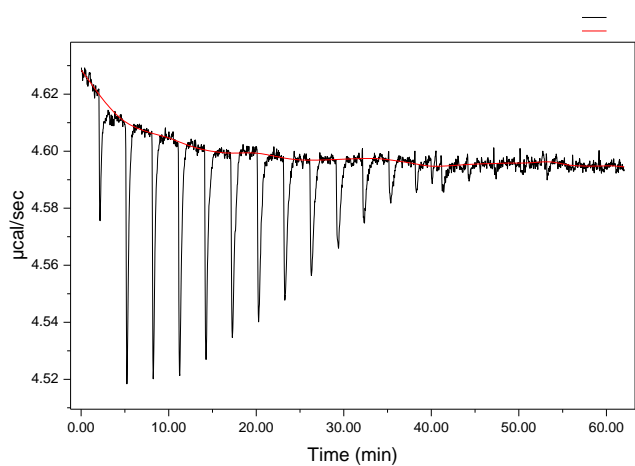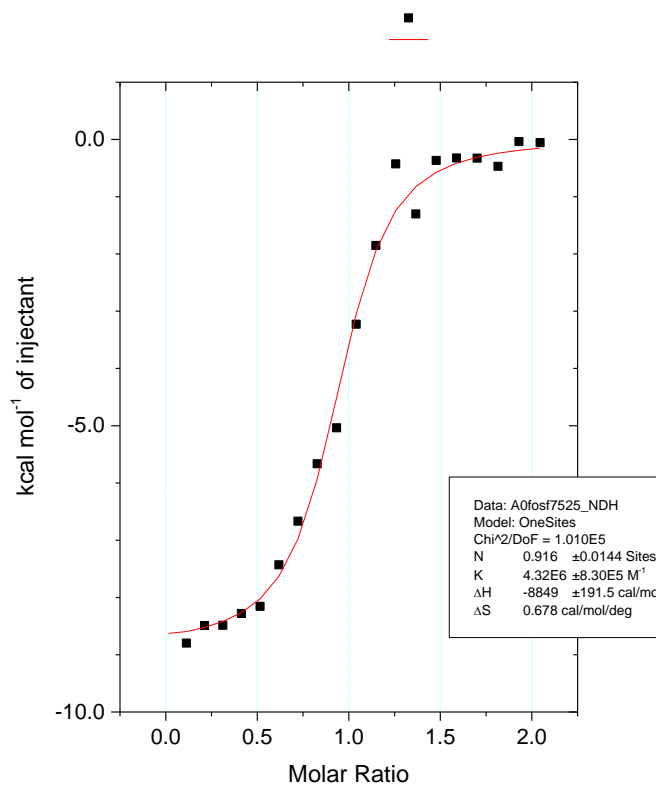

## CAII – chlorothiazide

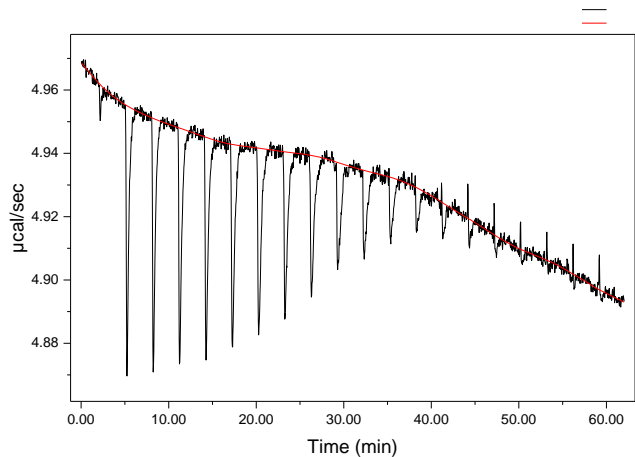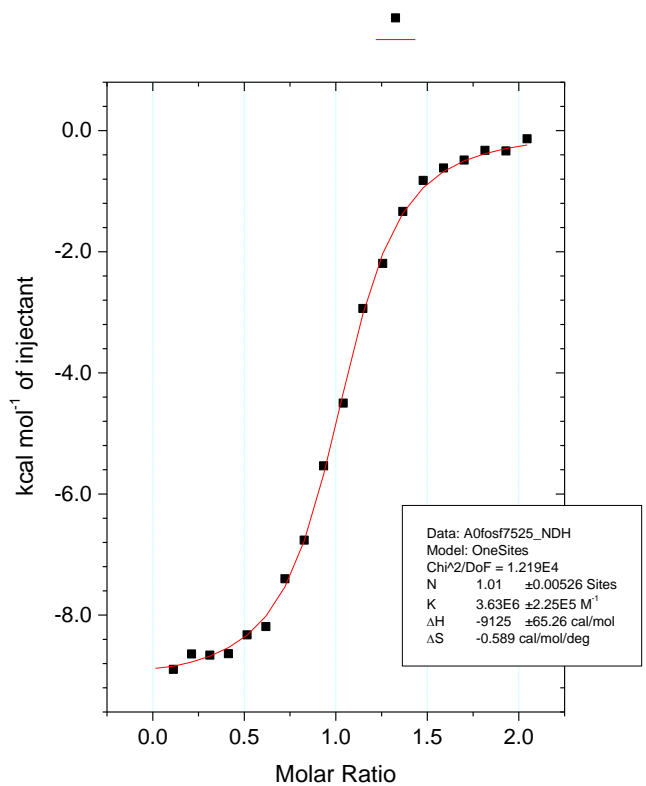

## 4. Hydrochlorothiazide

### Fluorescence-based thermal shift assay

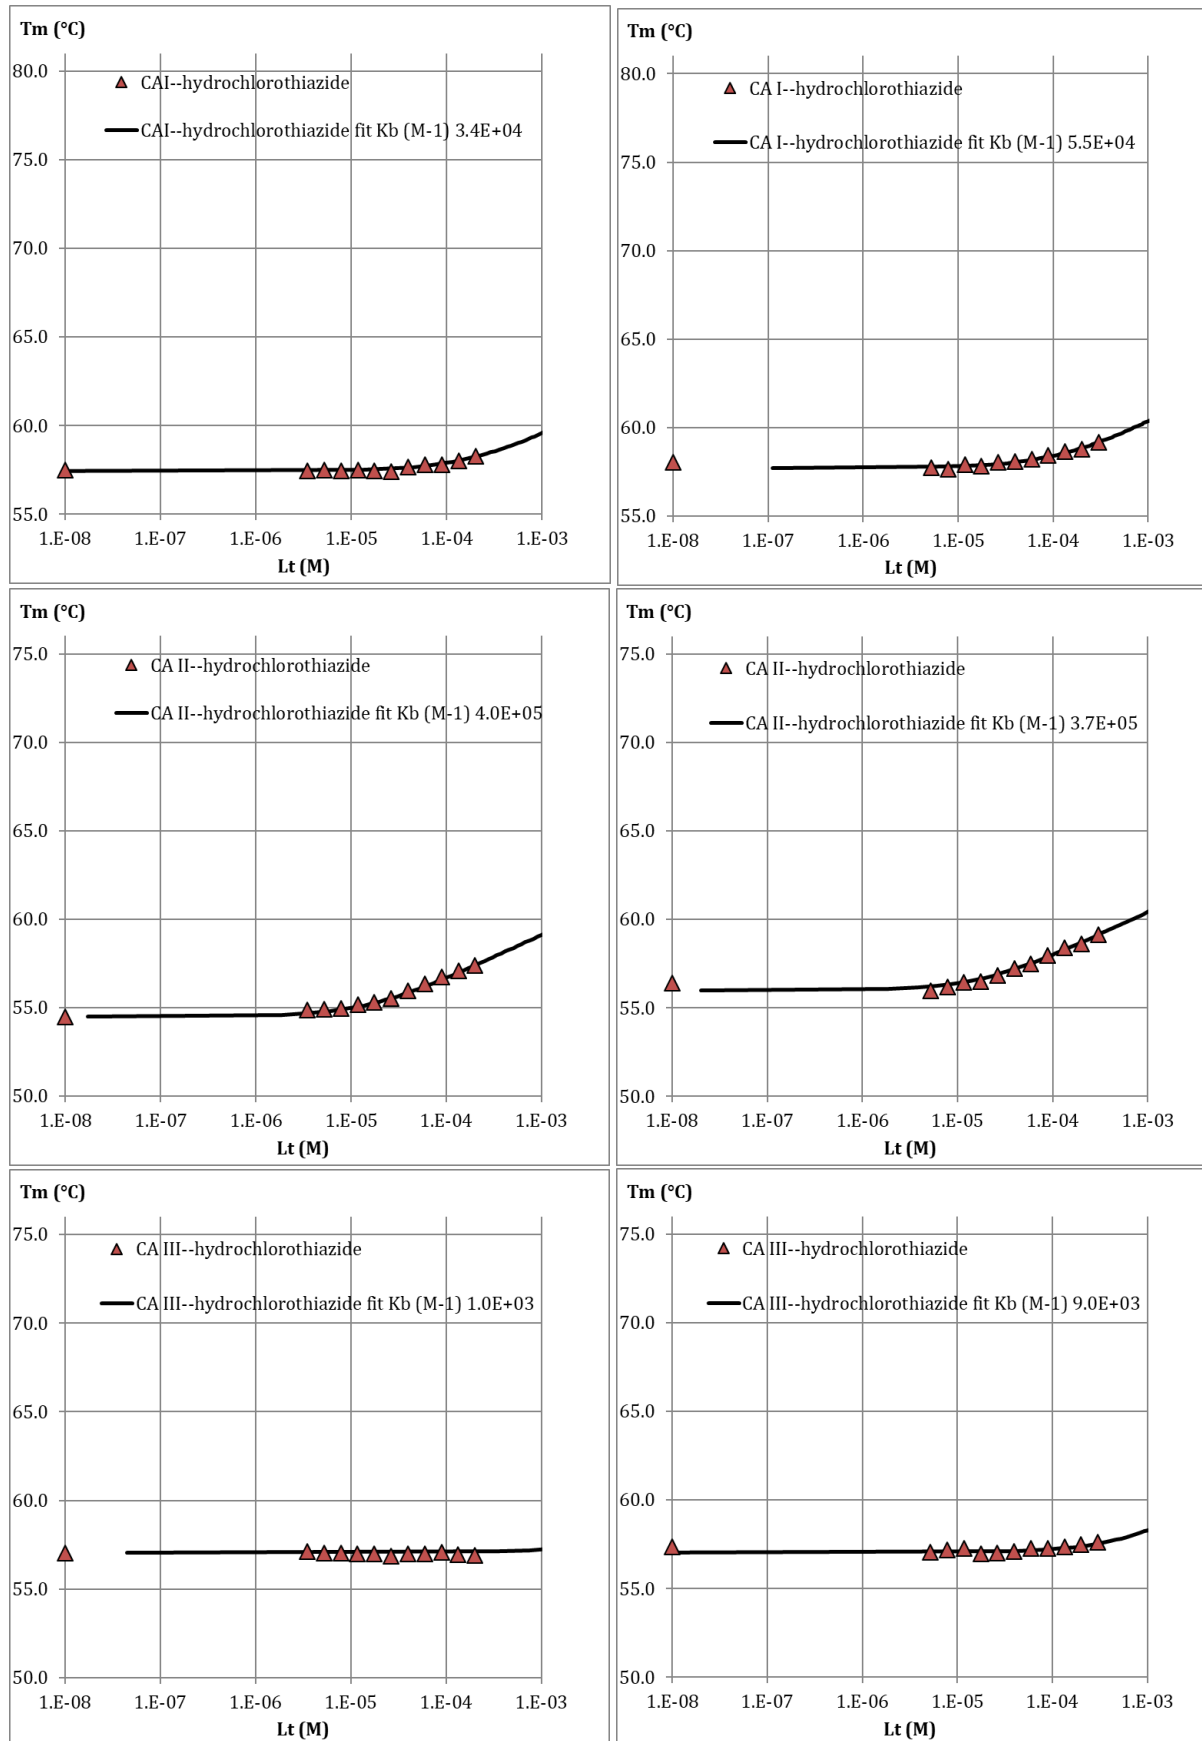

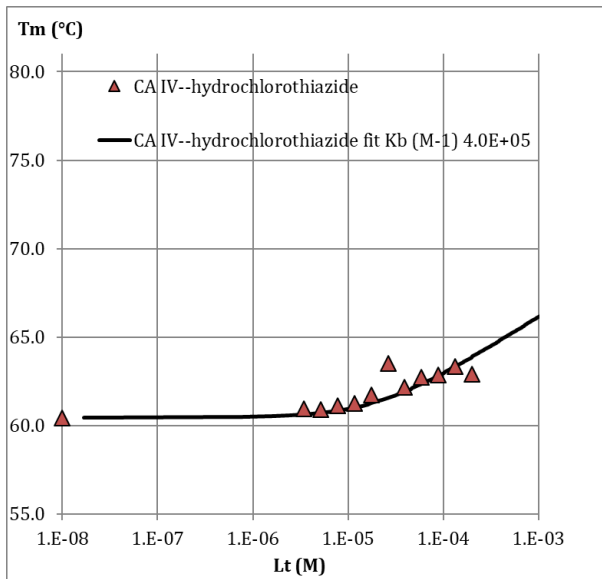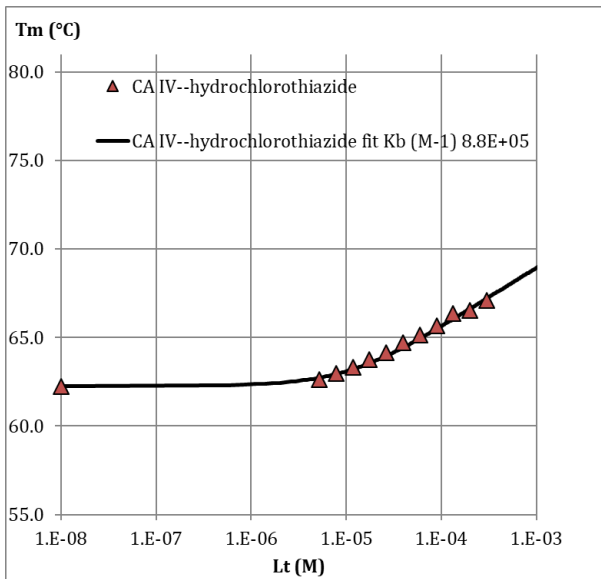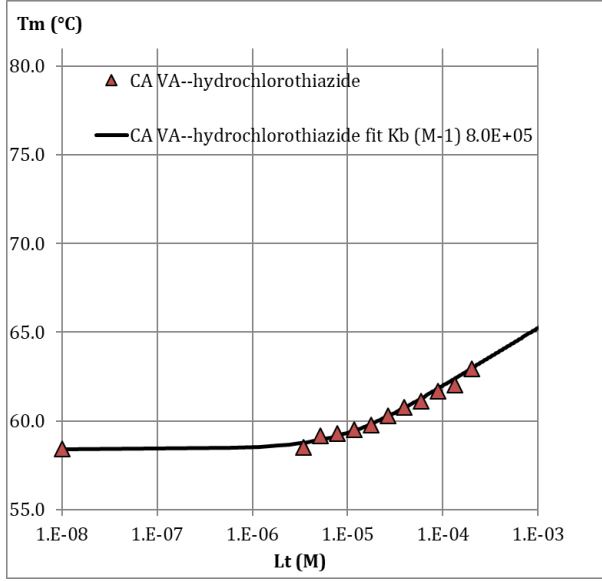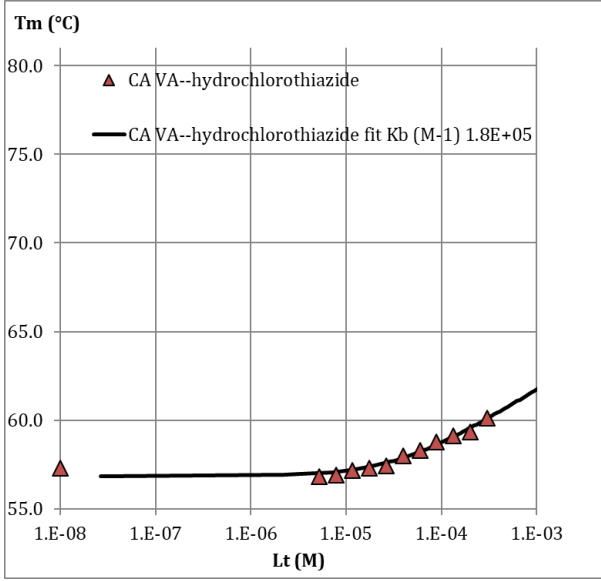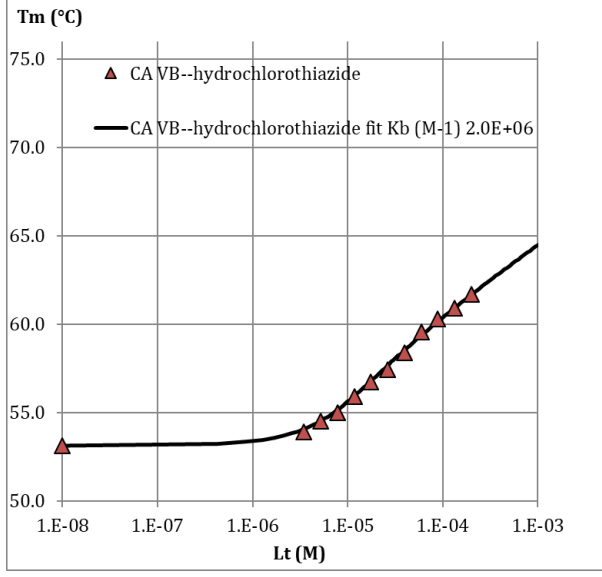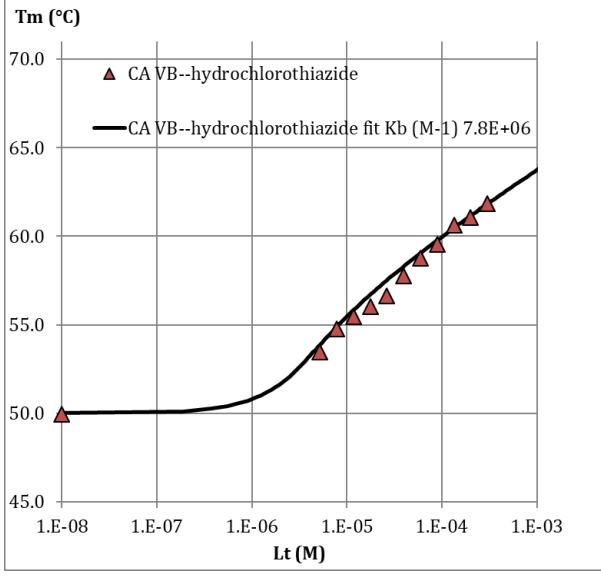

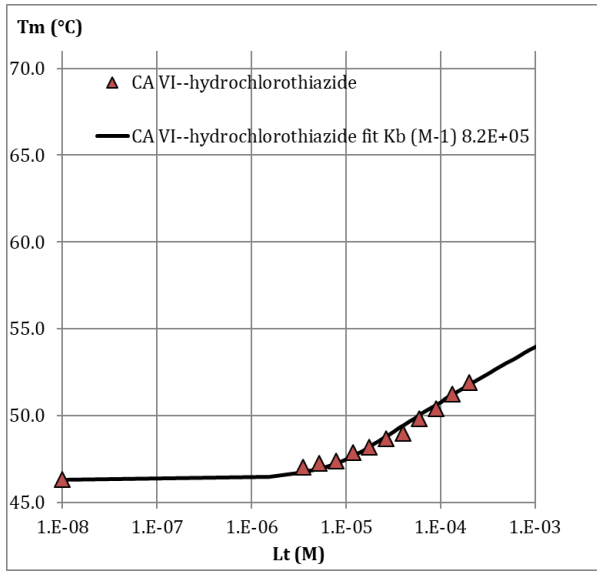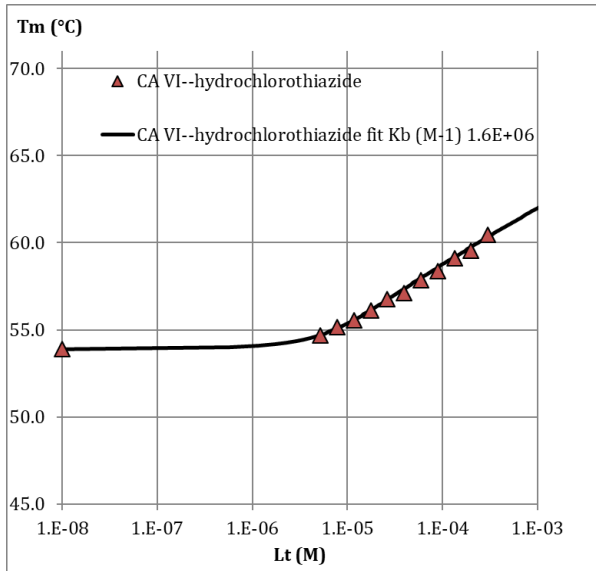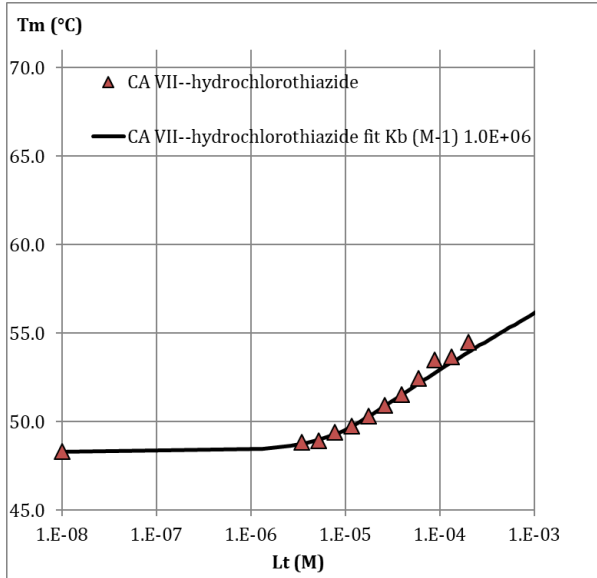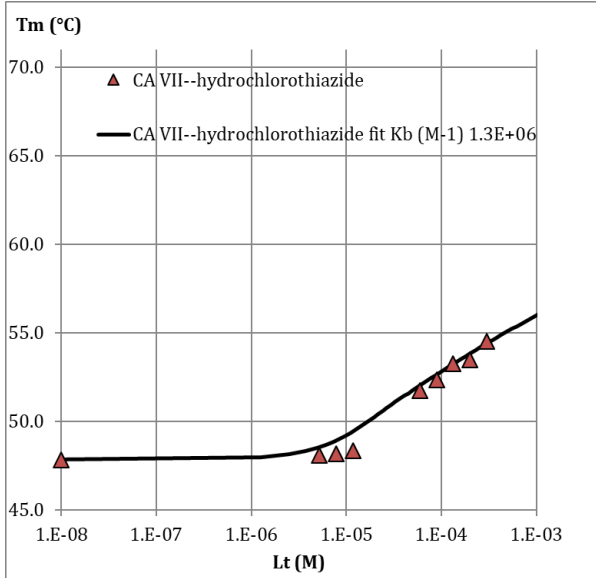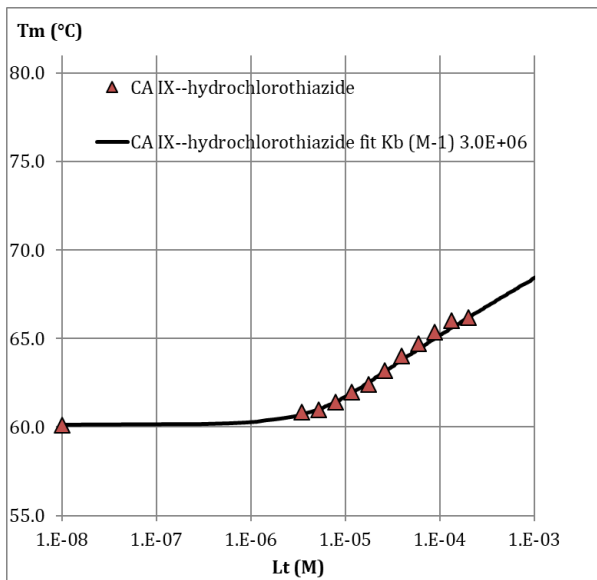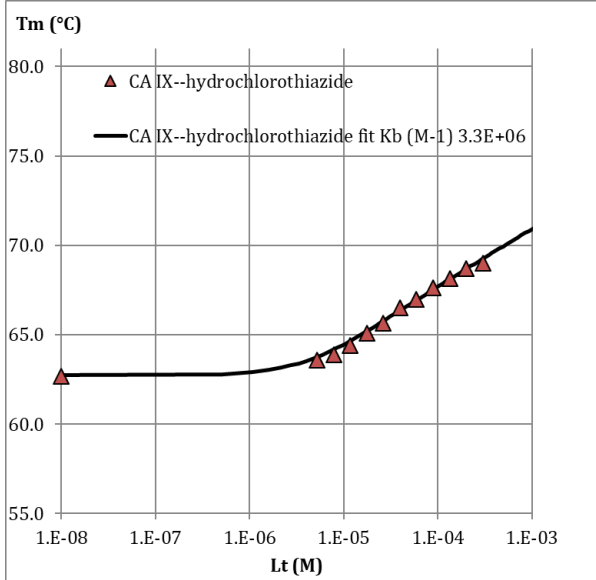



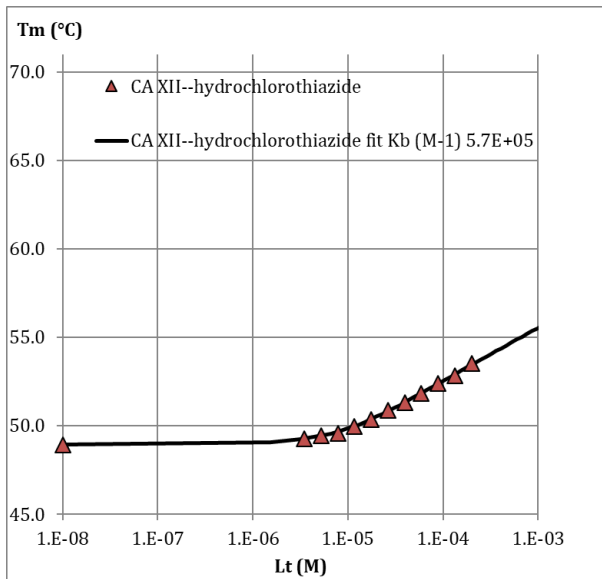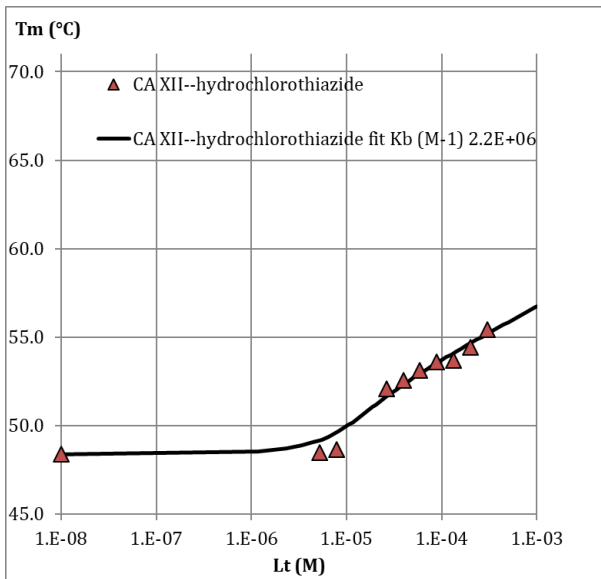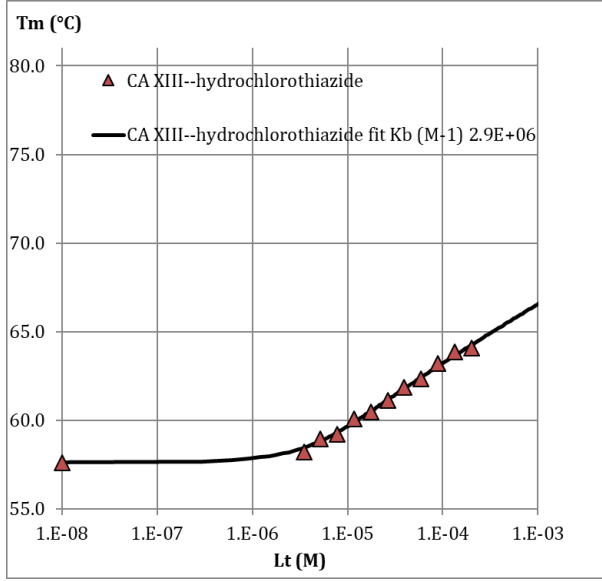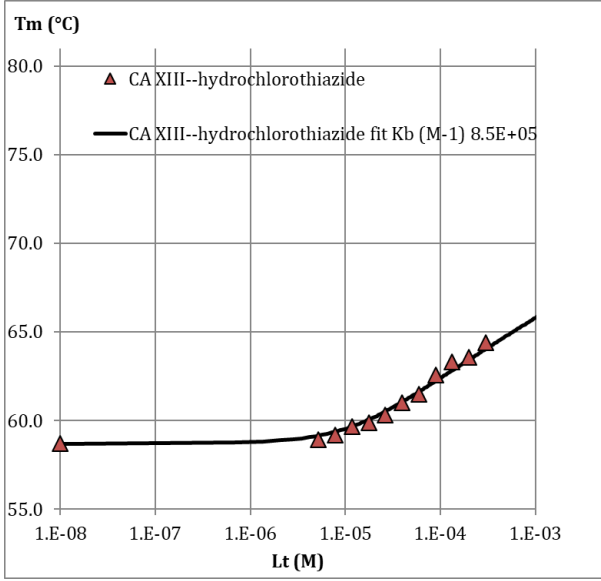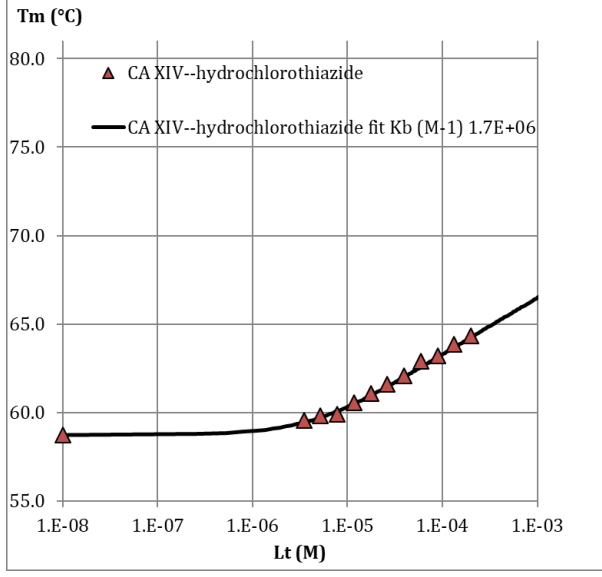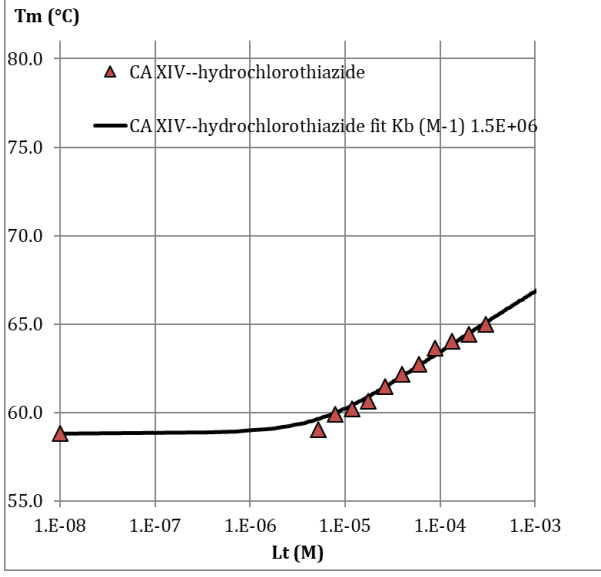

## CO<sub>2</sub> hydration activity inhibition:

### CA II- hydrochlorothiazide

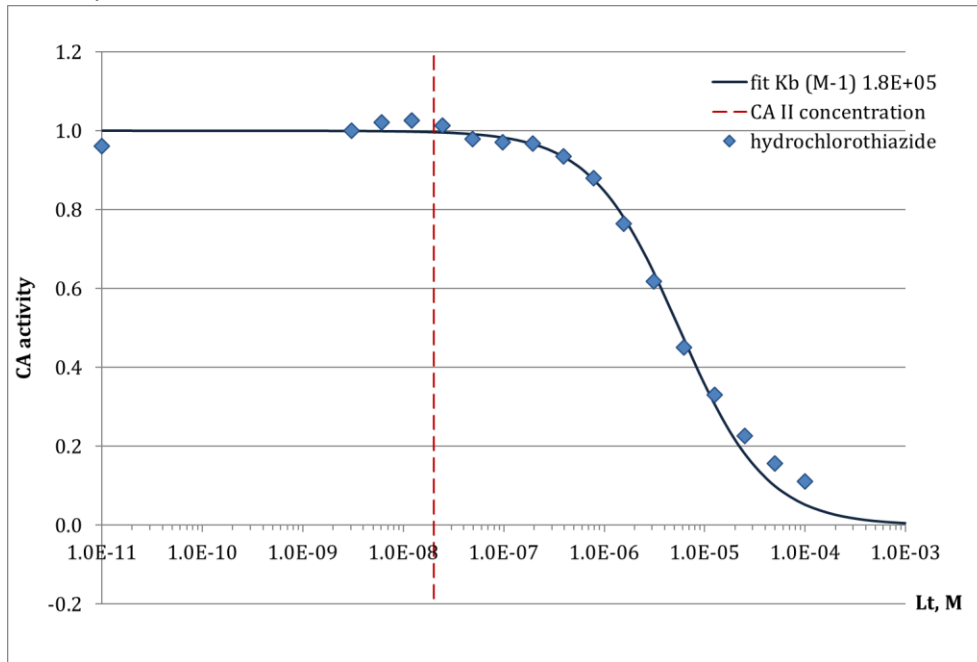

### CA IV - hydrochlorothiazide

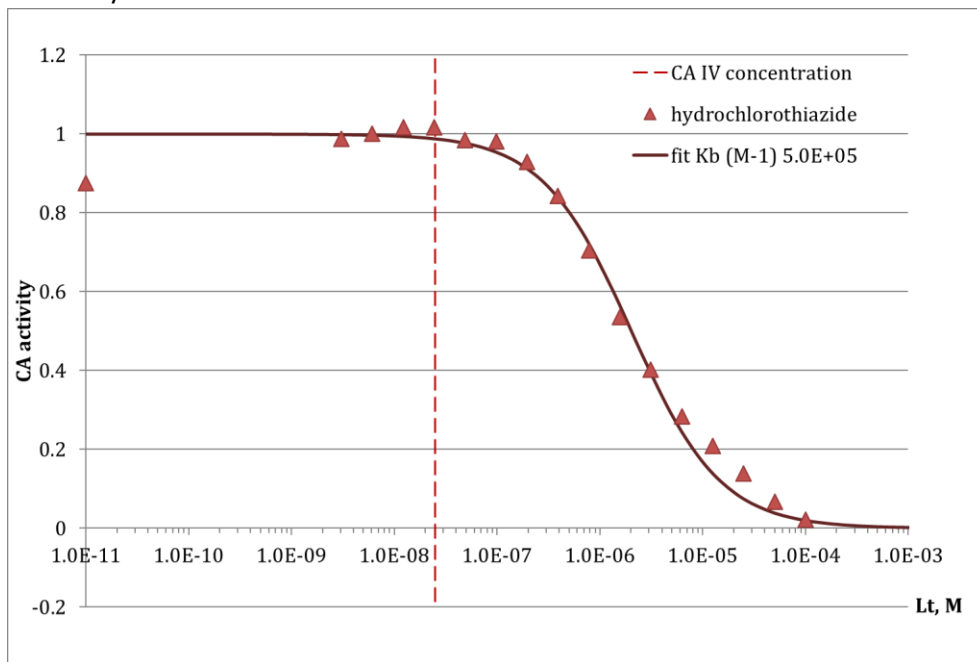

# Isothermal titration calorimetry

## CA II – hydrochlorothiazide

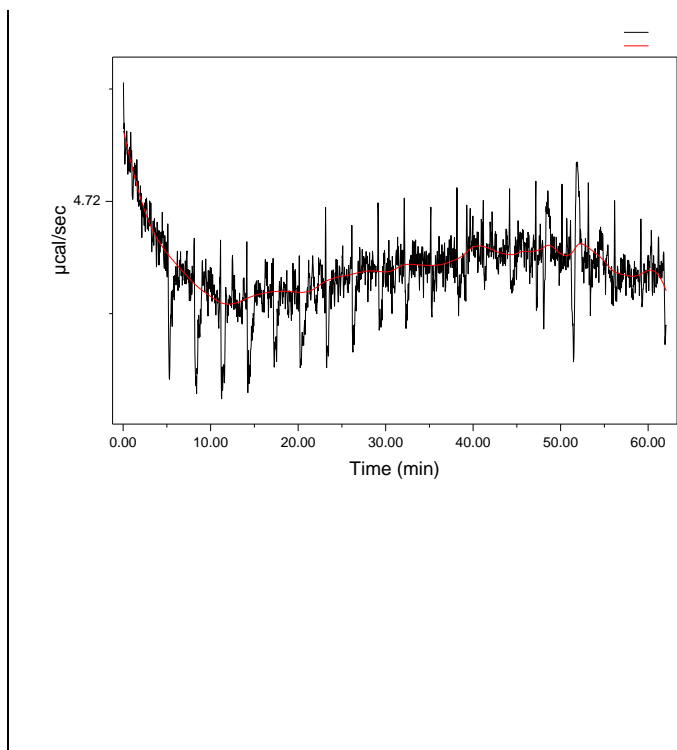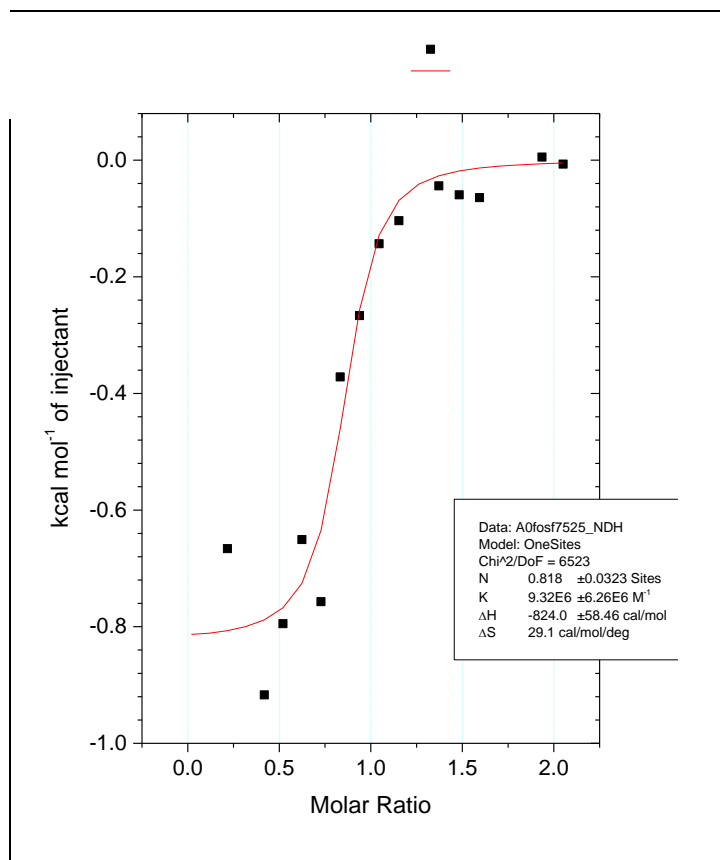

# 5. Trichloromethiazide

## Fluorence-based thermal shift assay

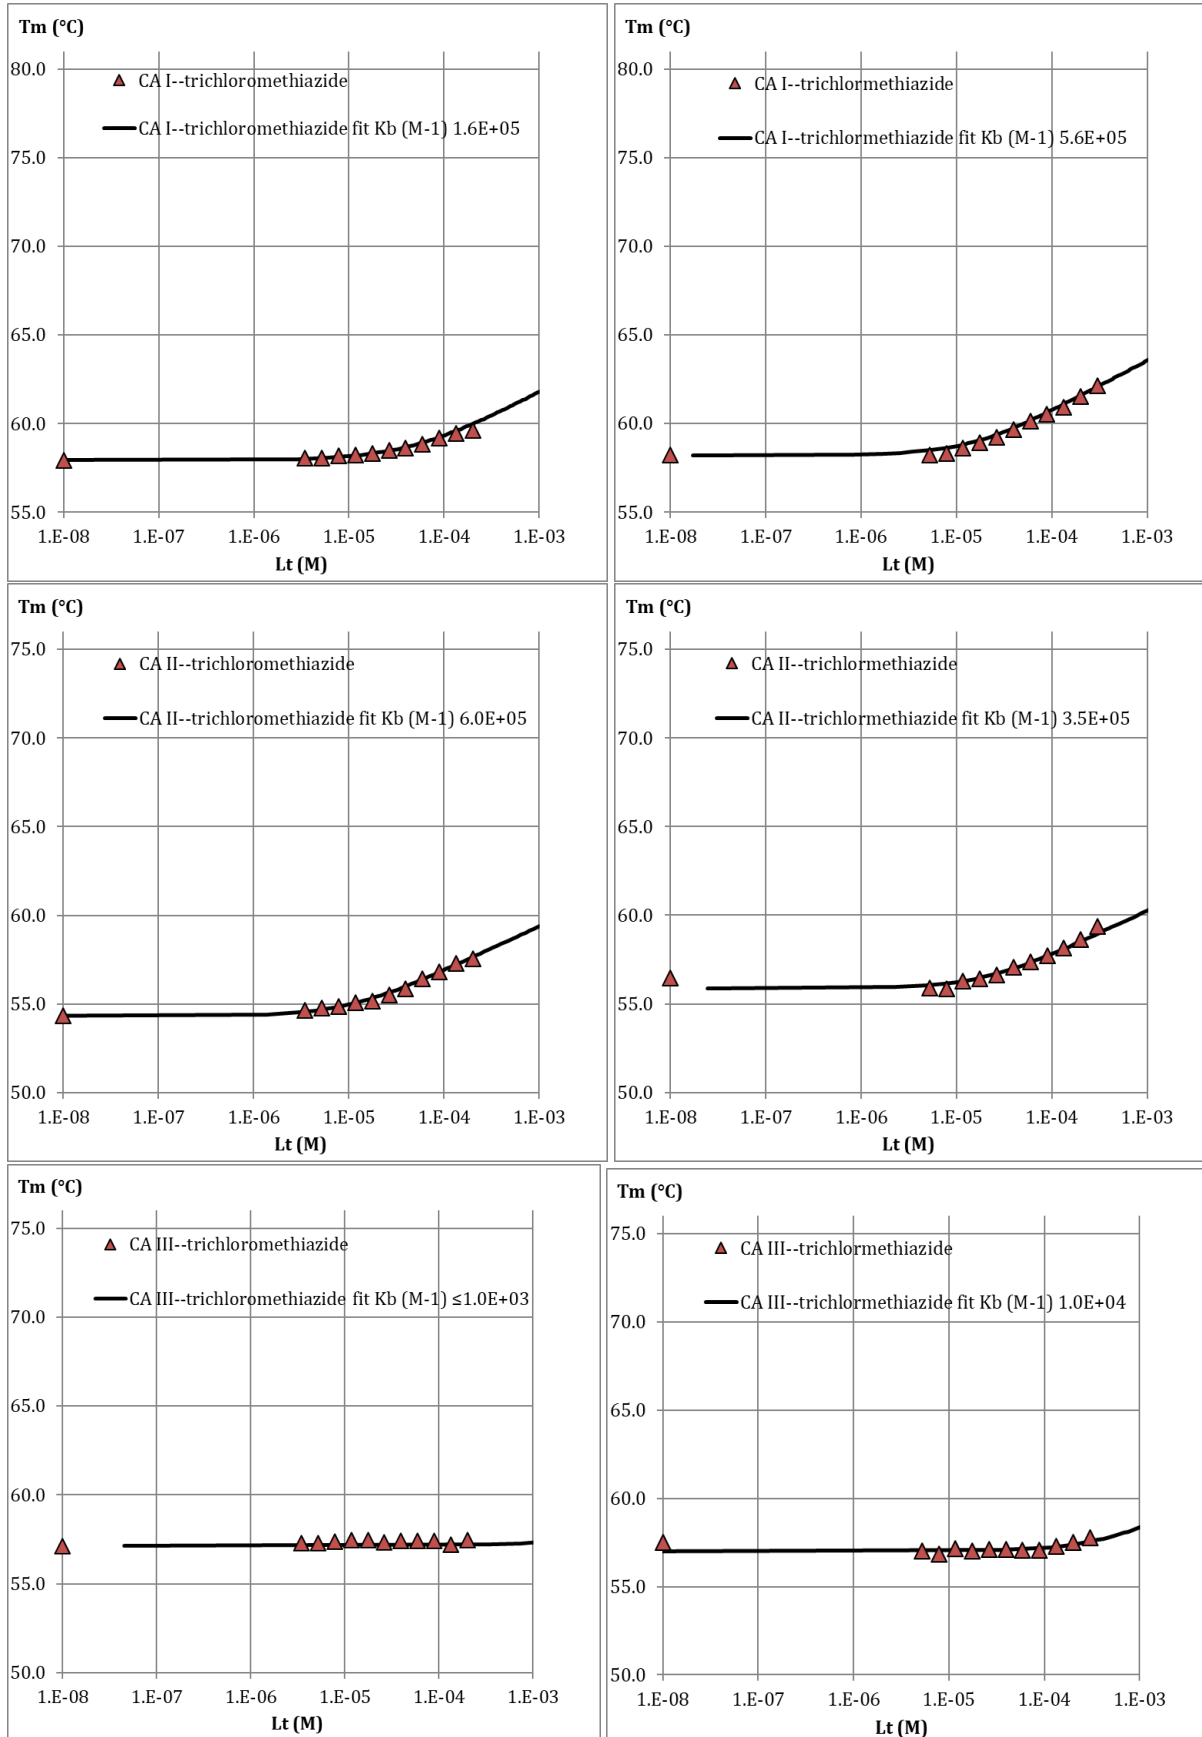

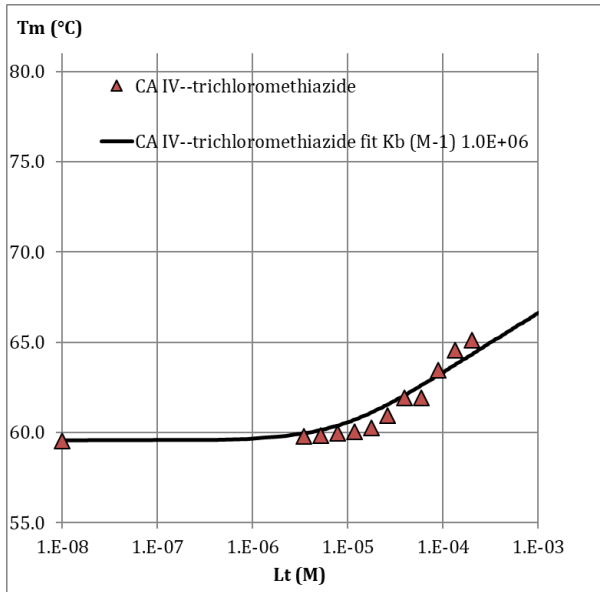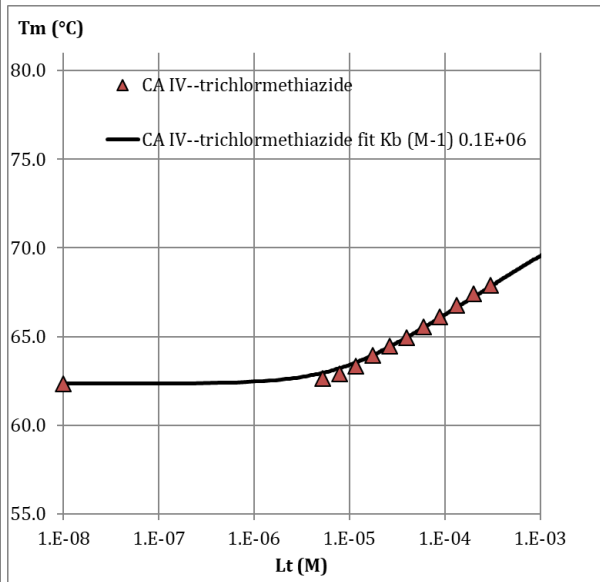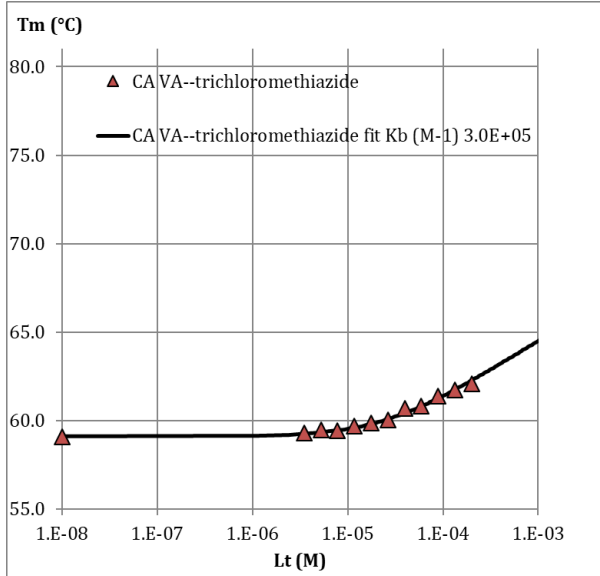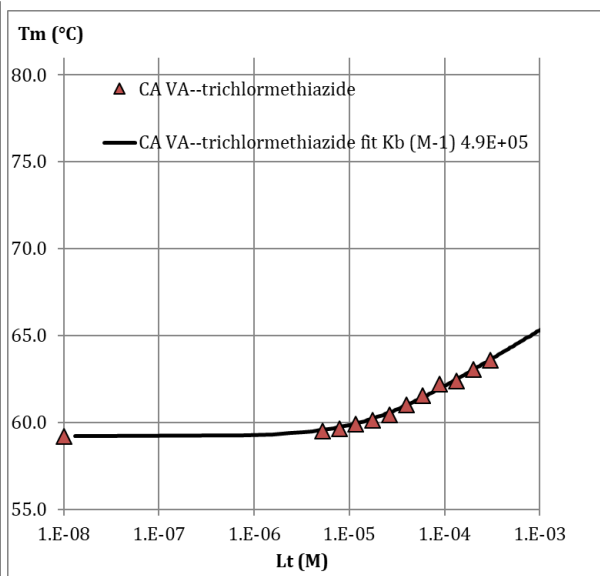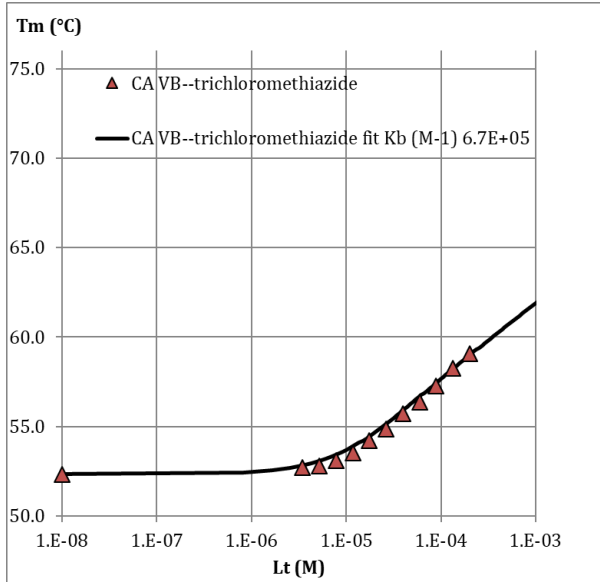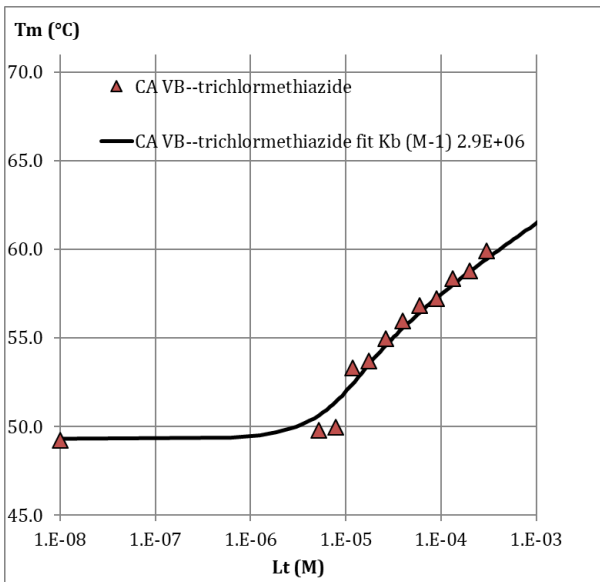

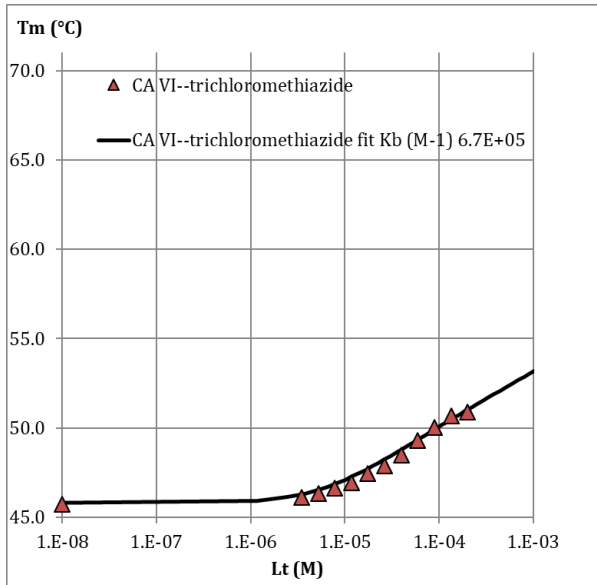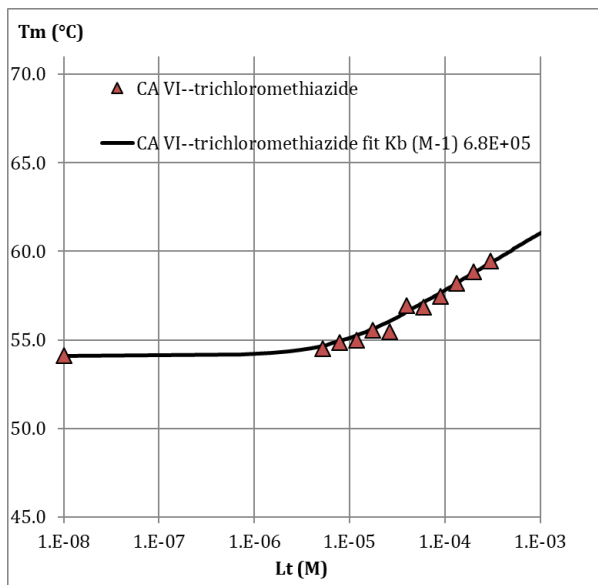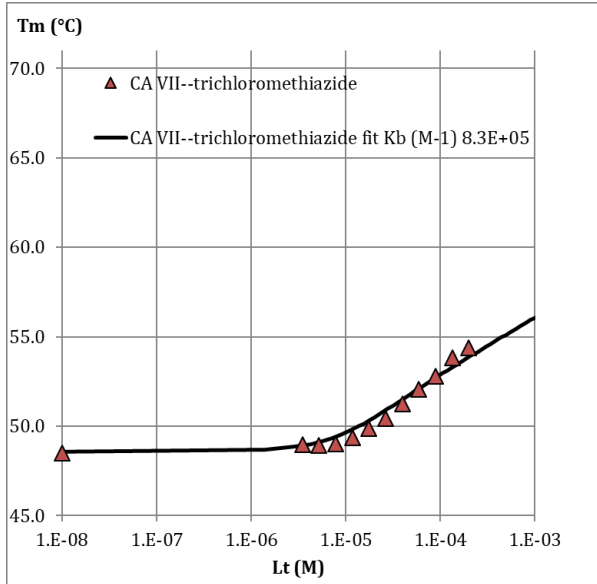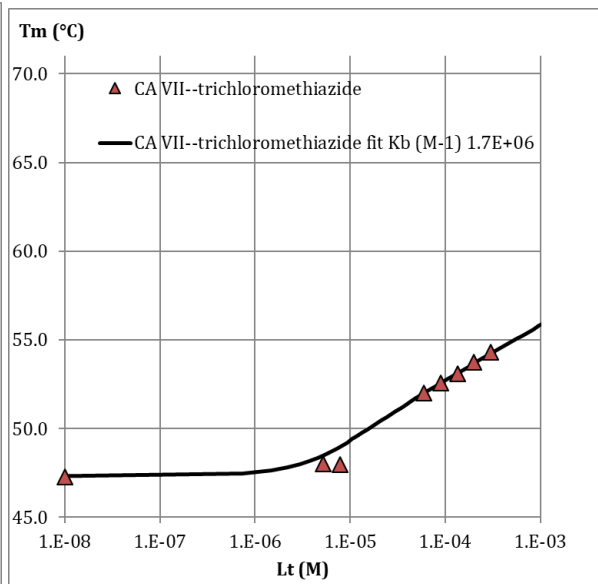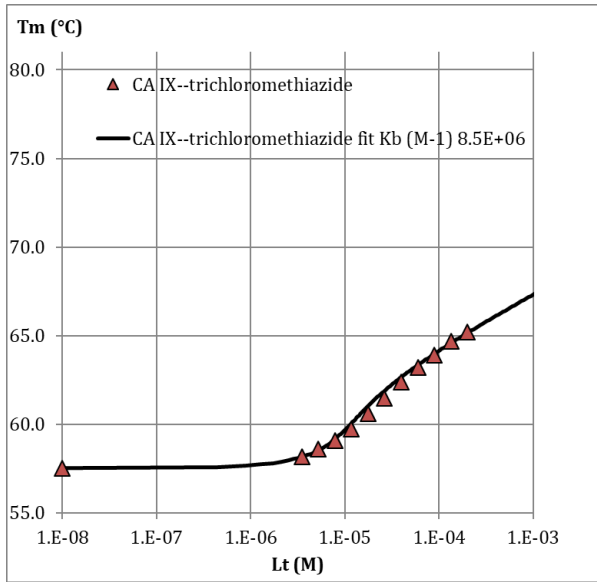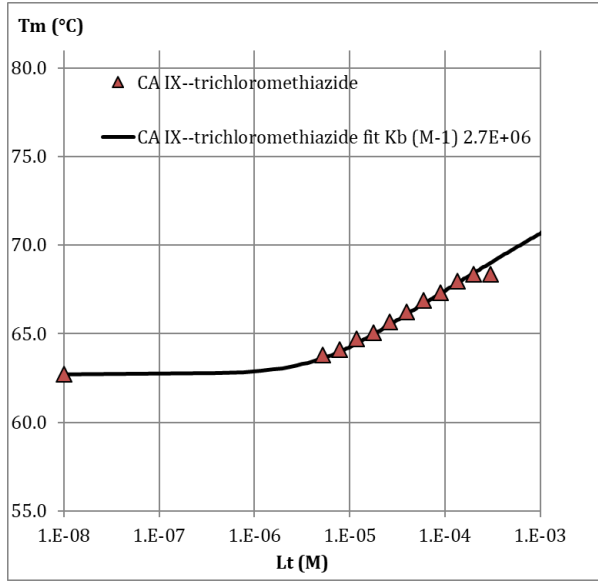

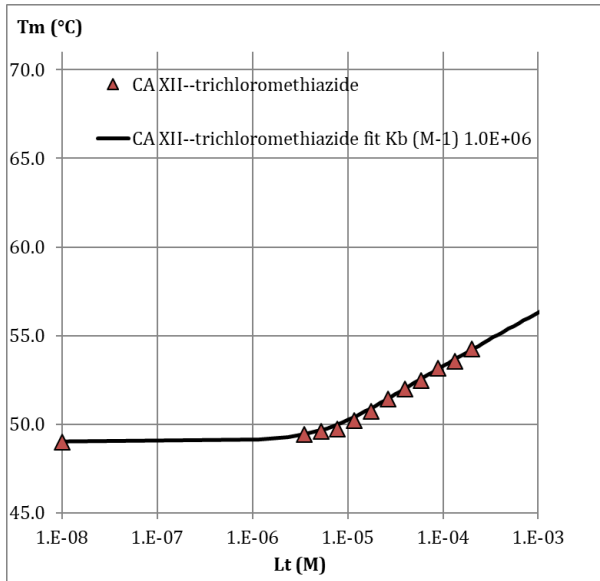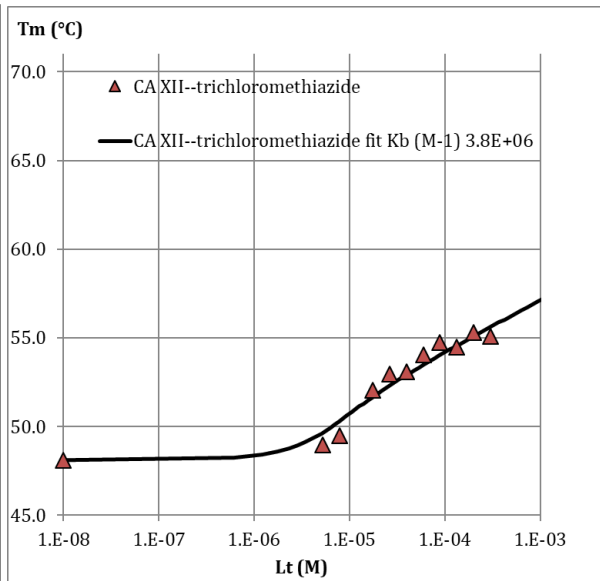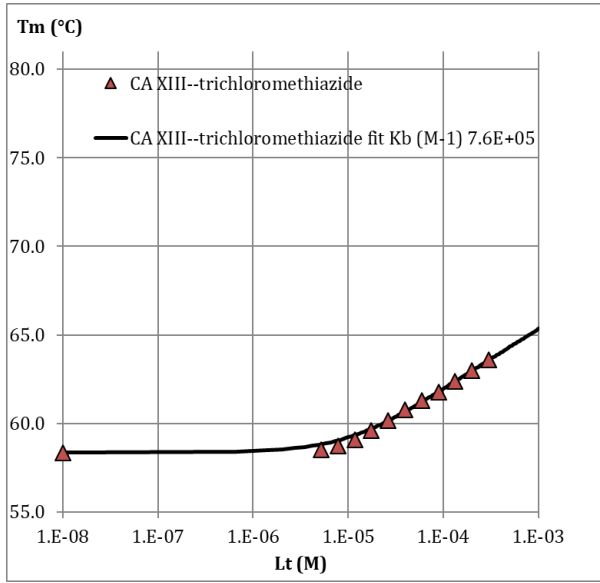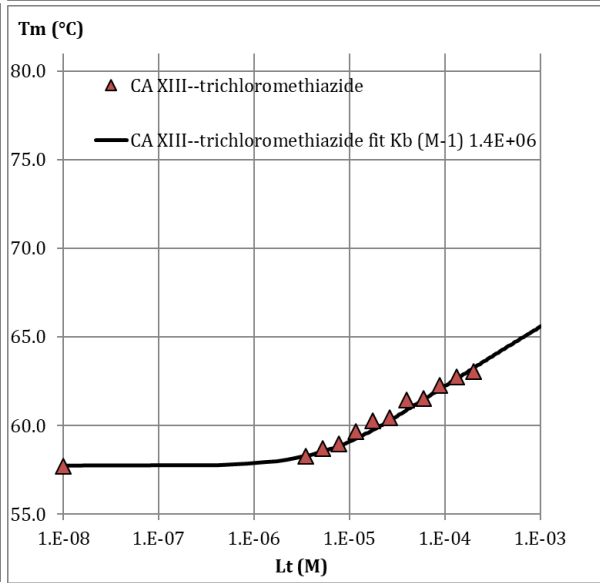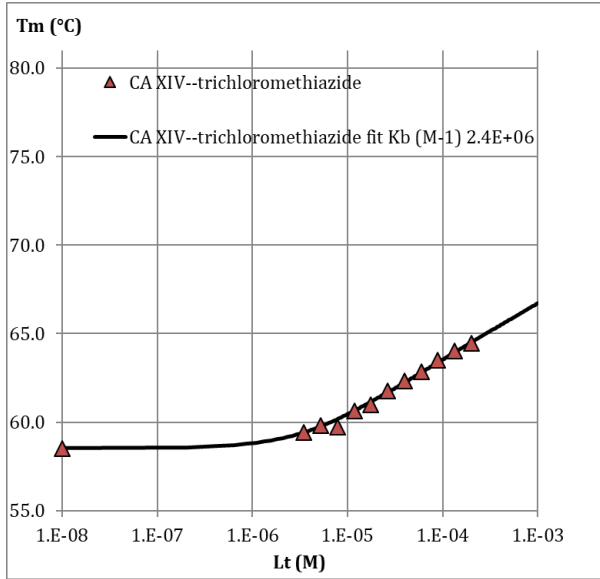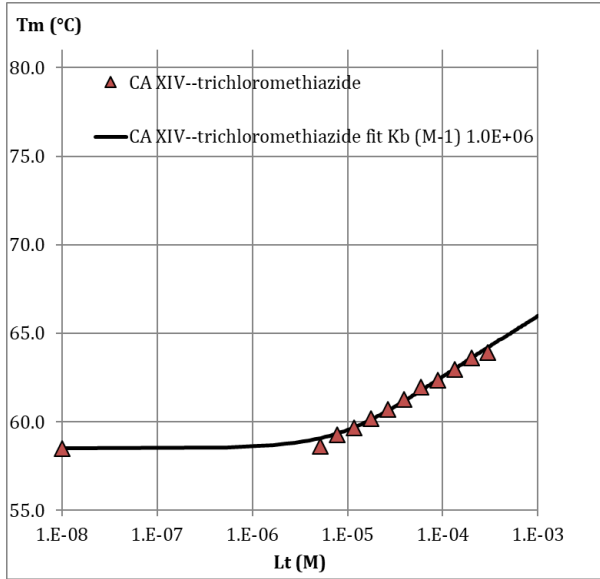

## 6. Cyclothiazide

### Fluorescence-based thermal shift assay

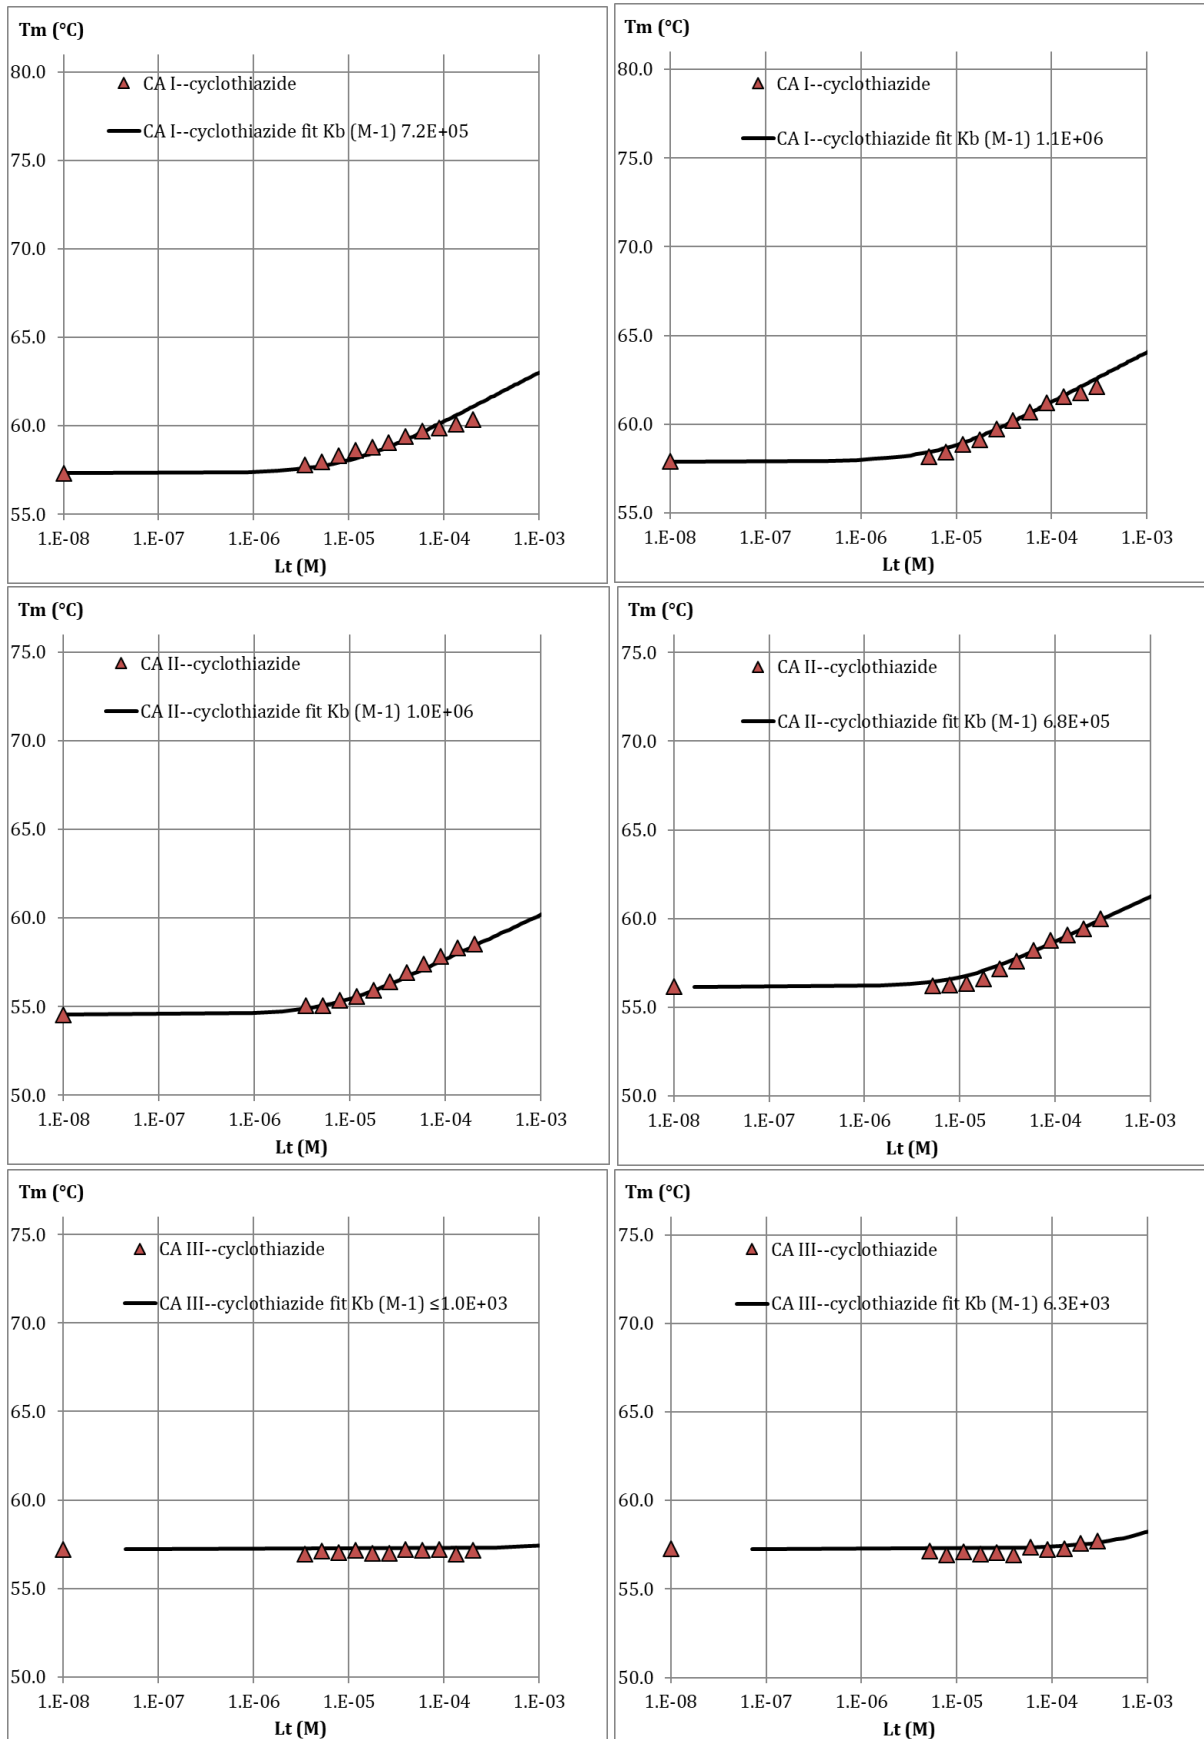



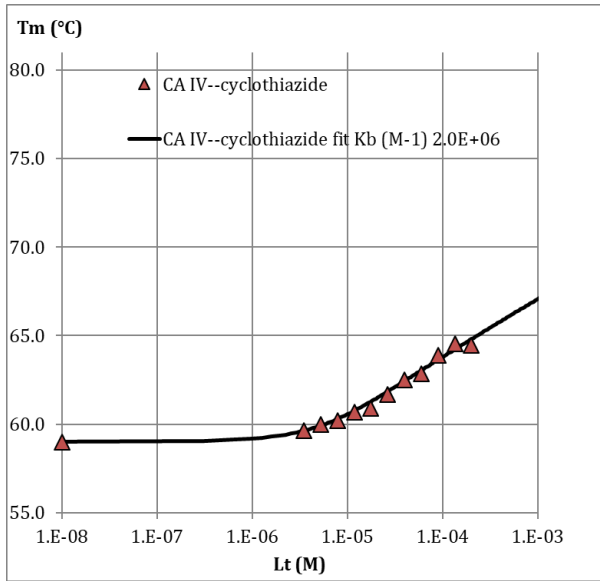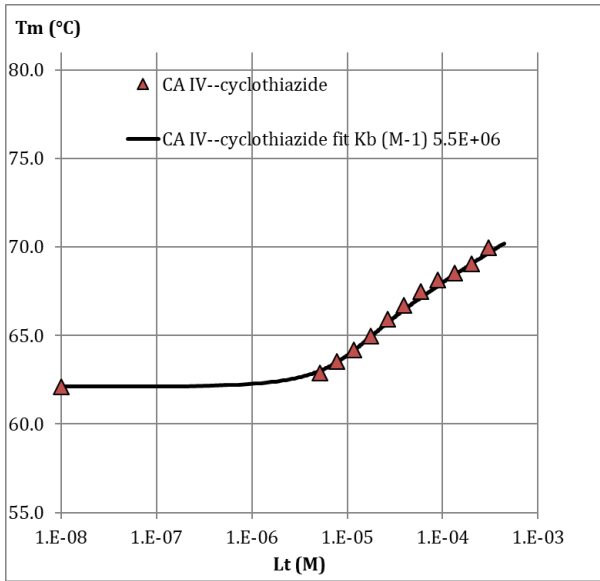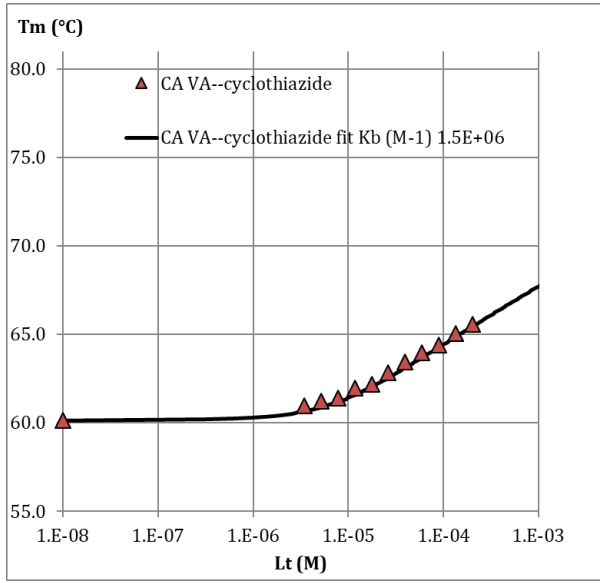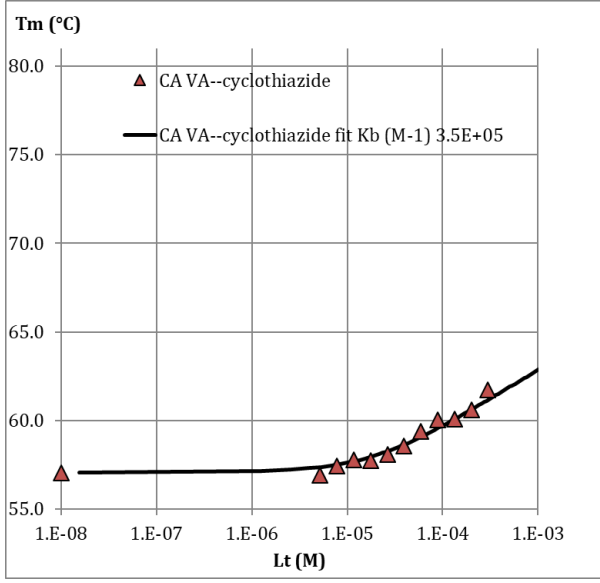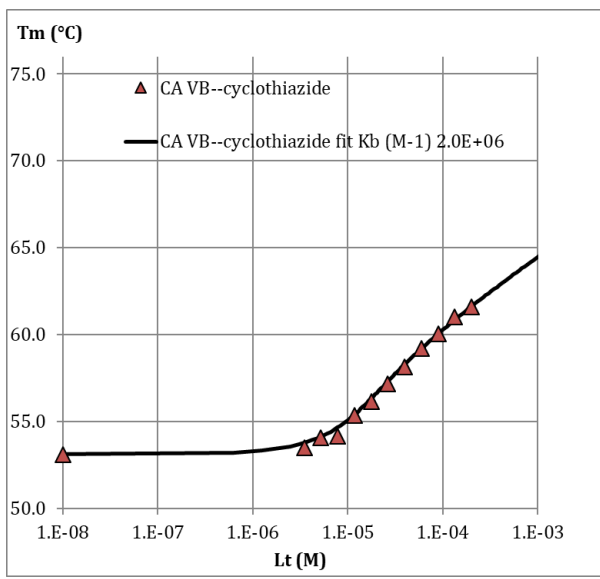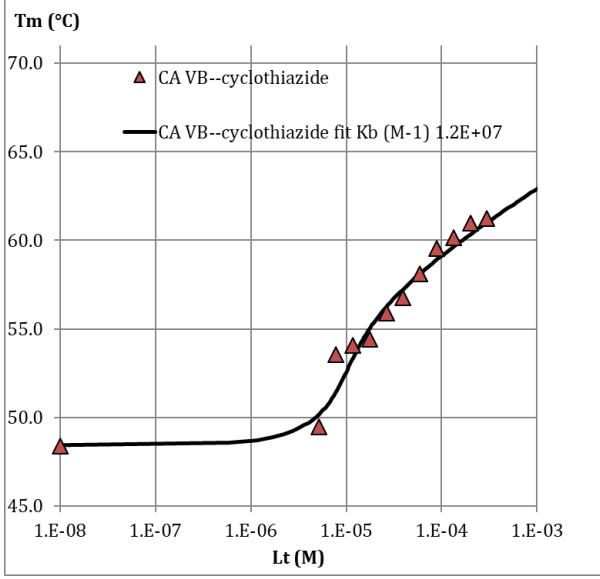

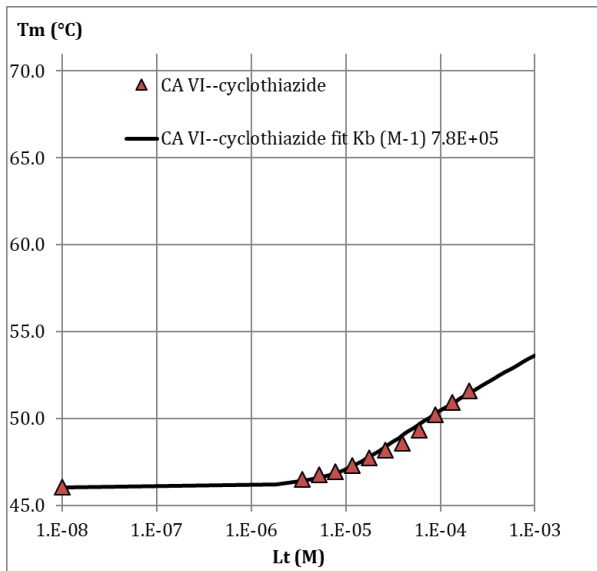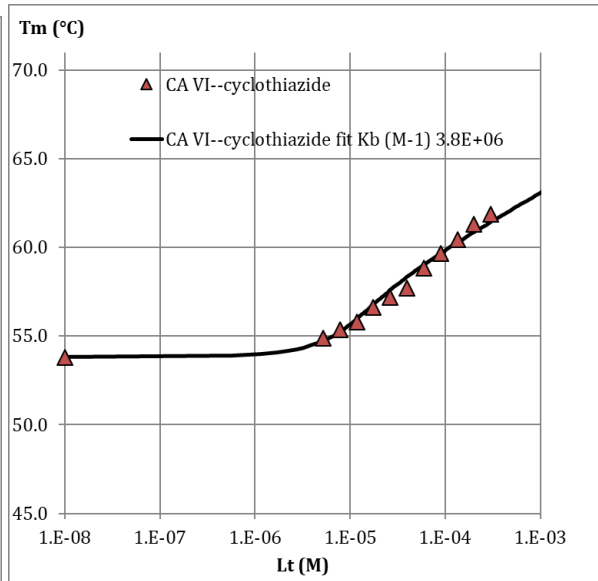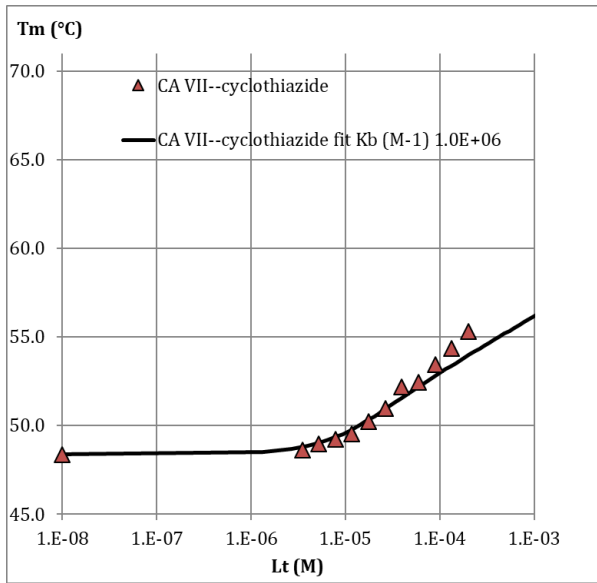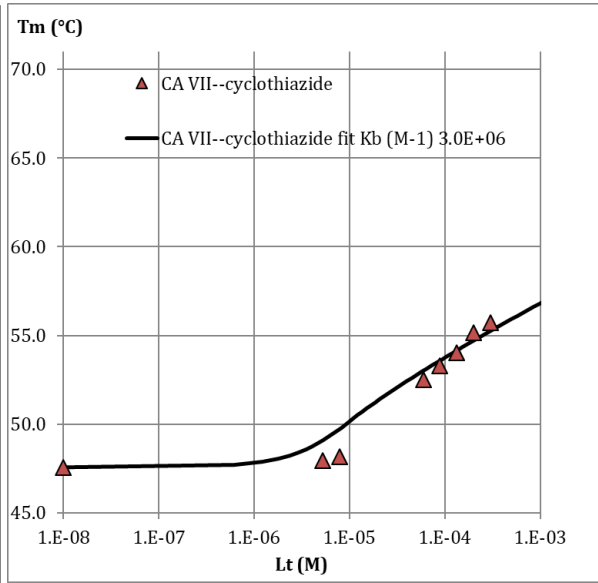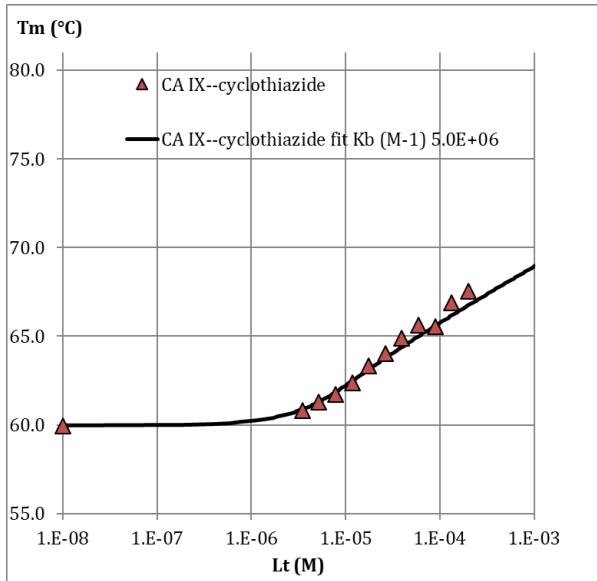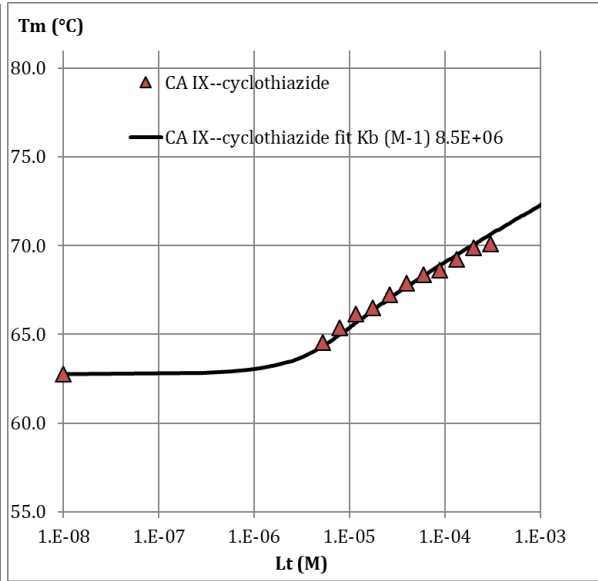

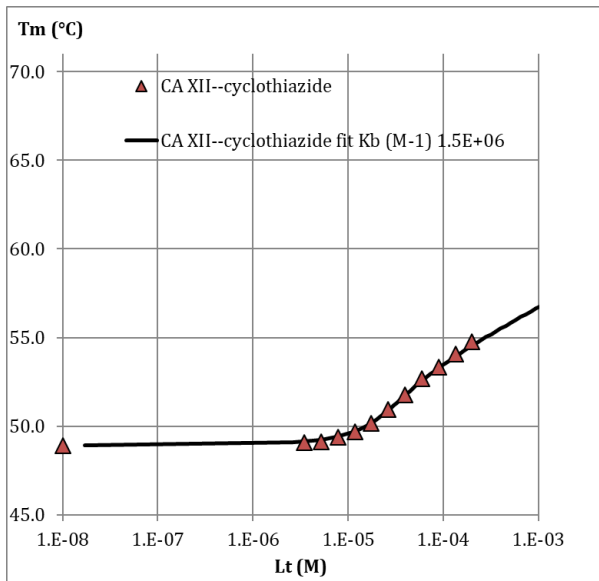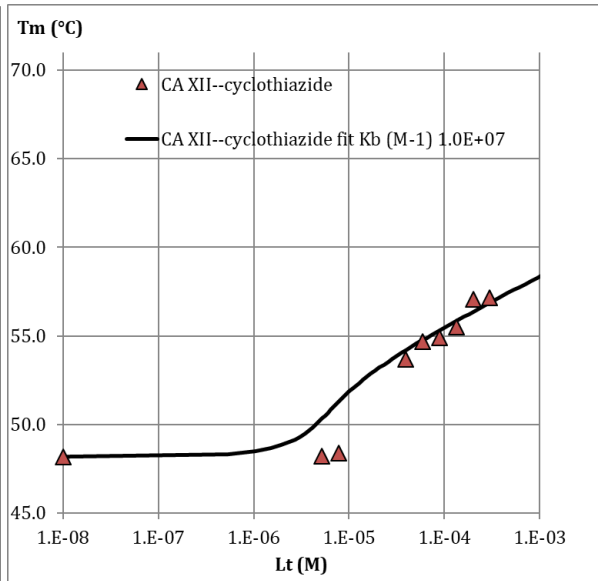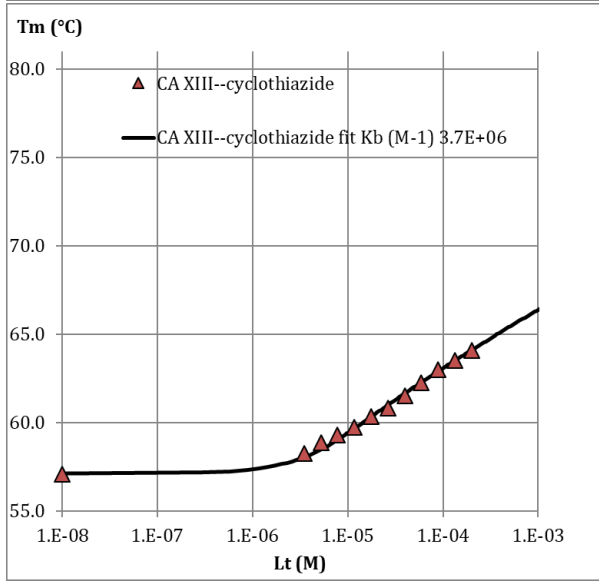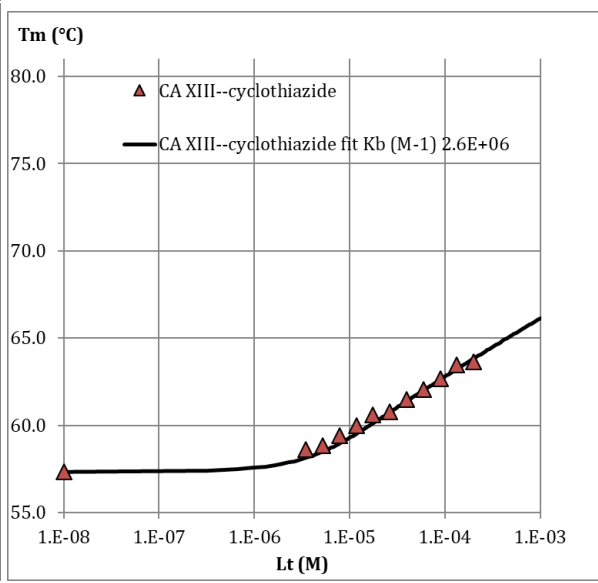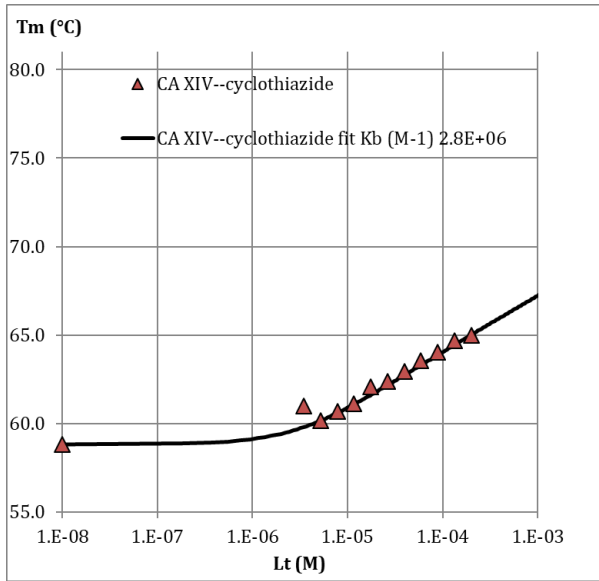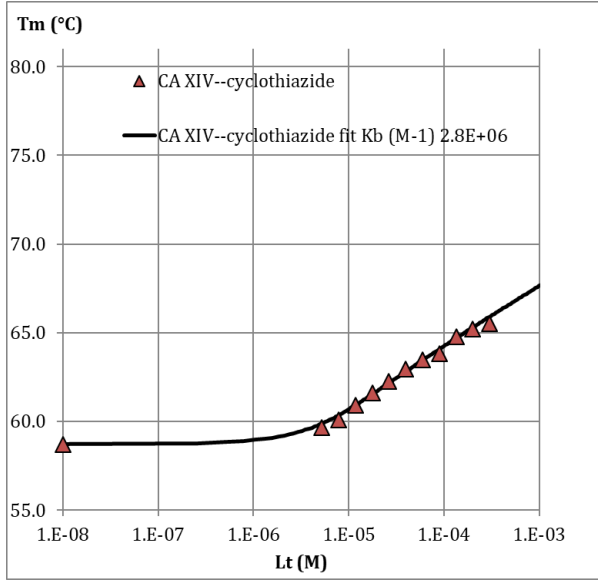

# 7. Polythiazide

## Fluorecence-based thermal shift assay

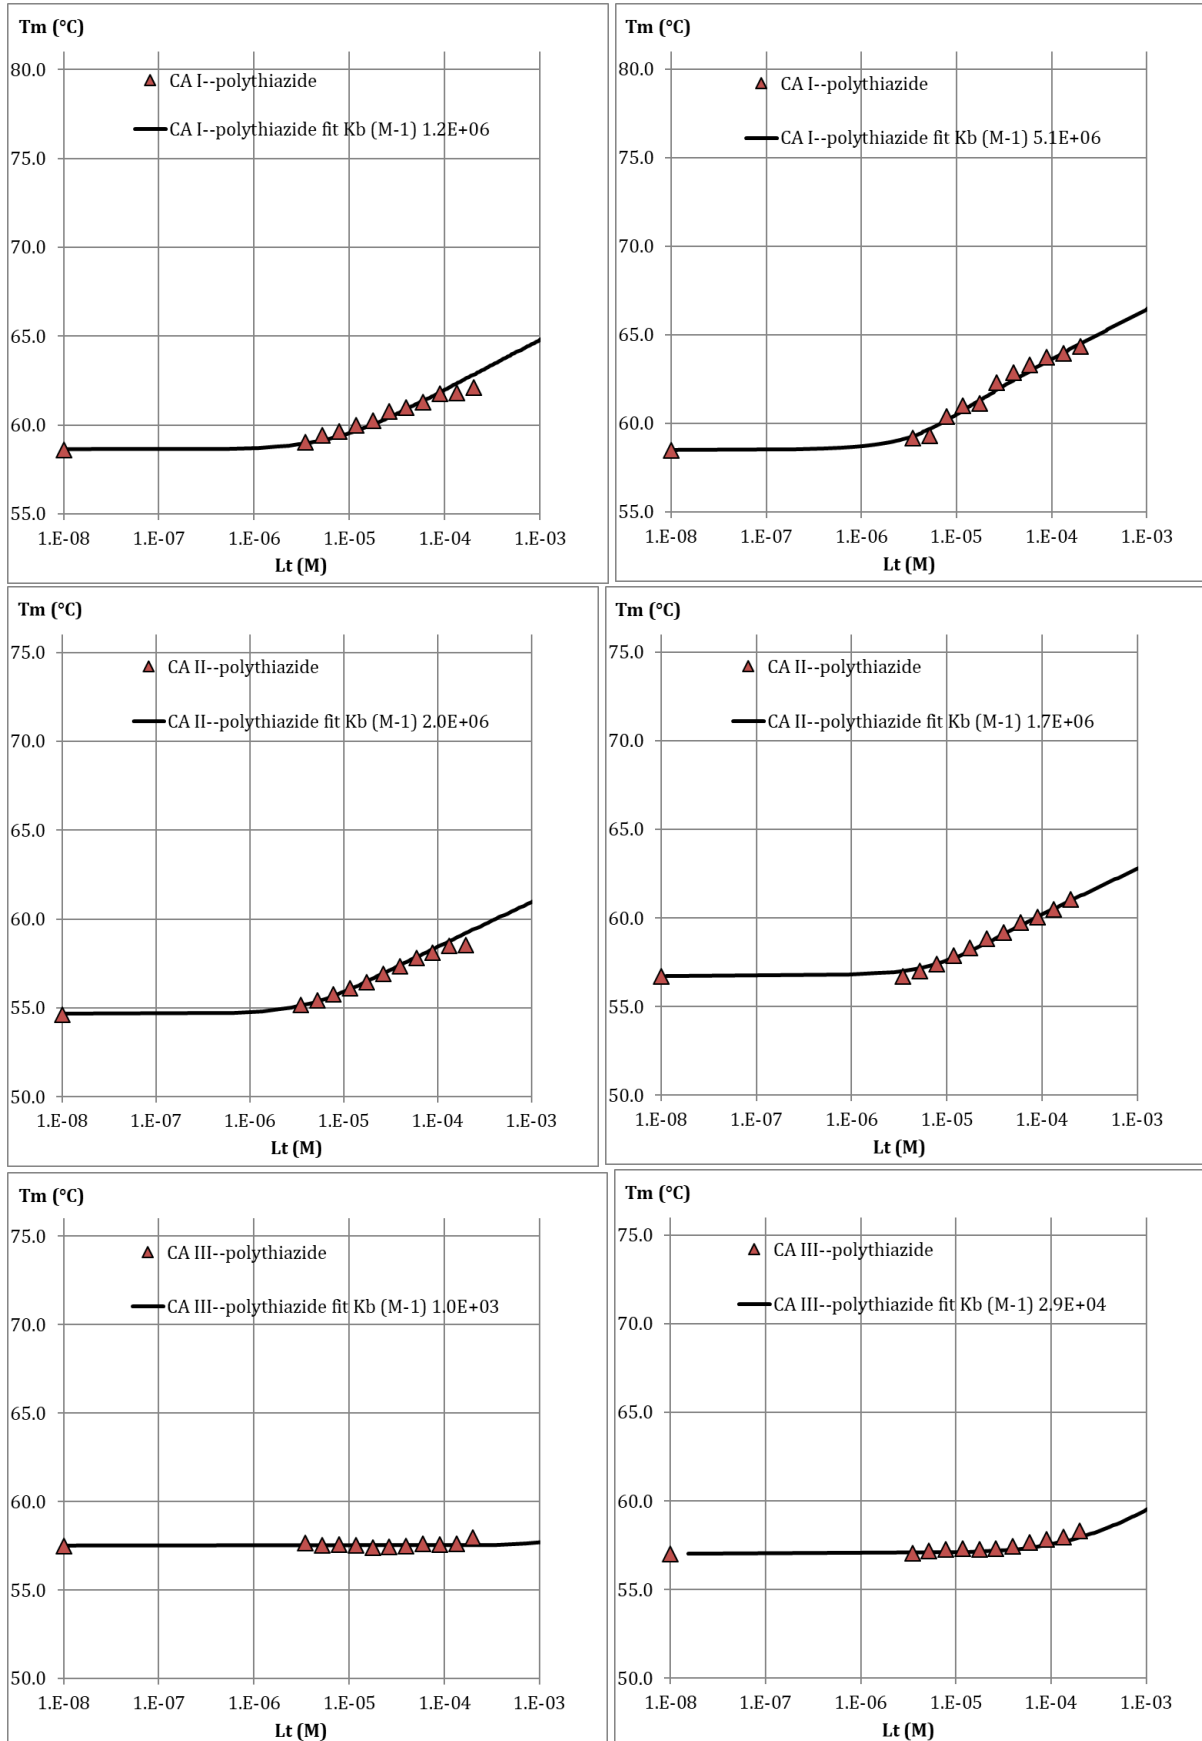

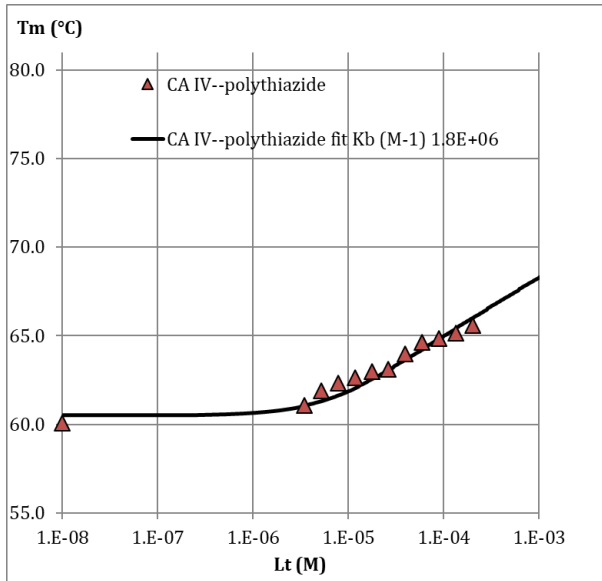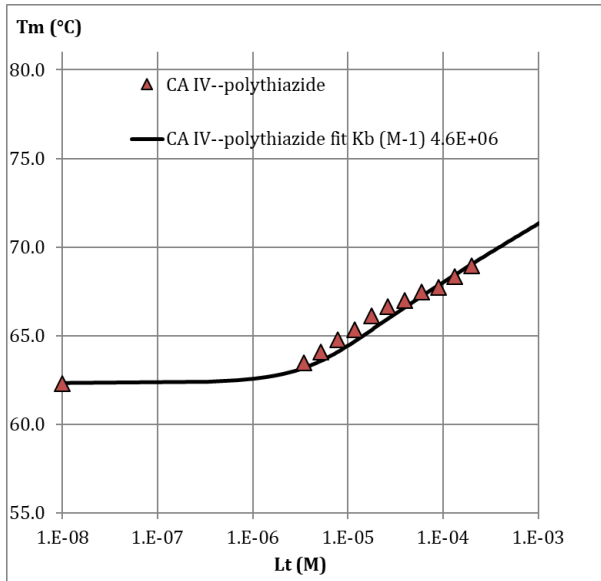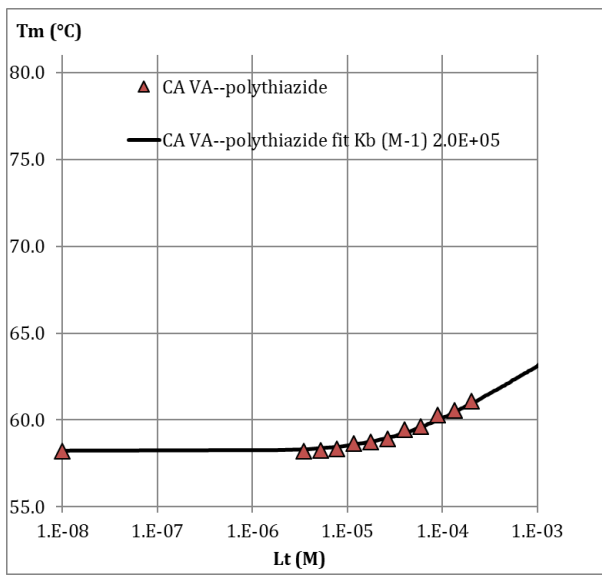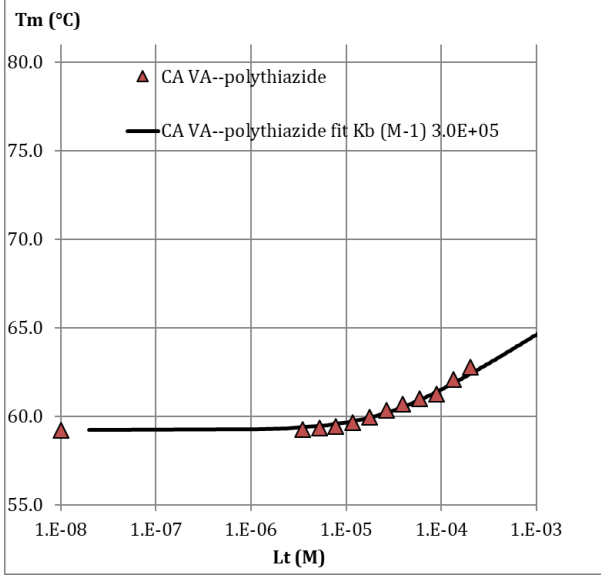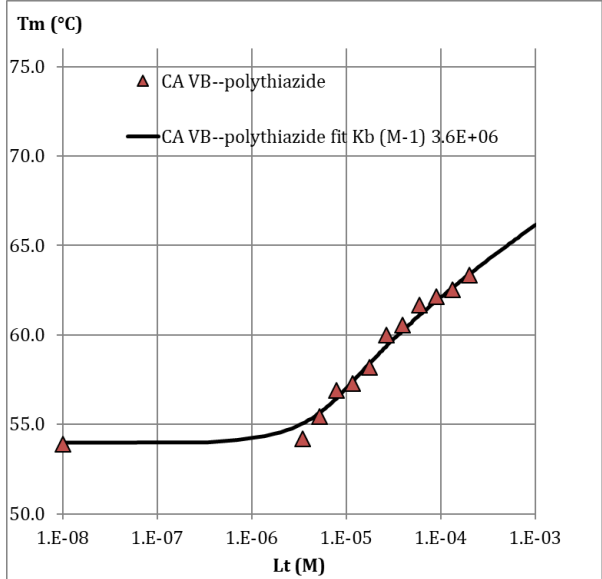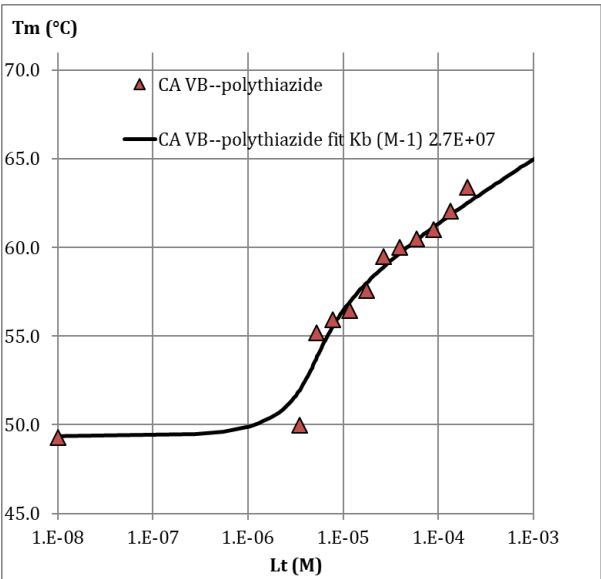

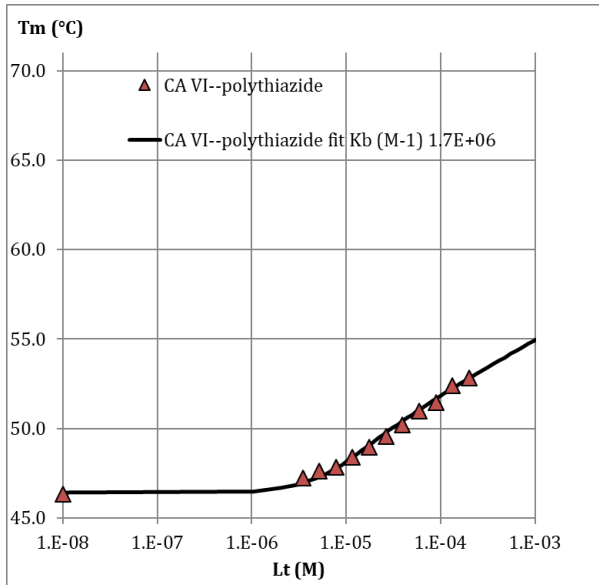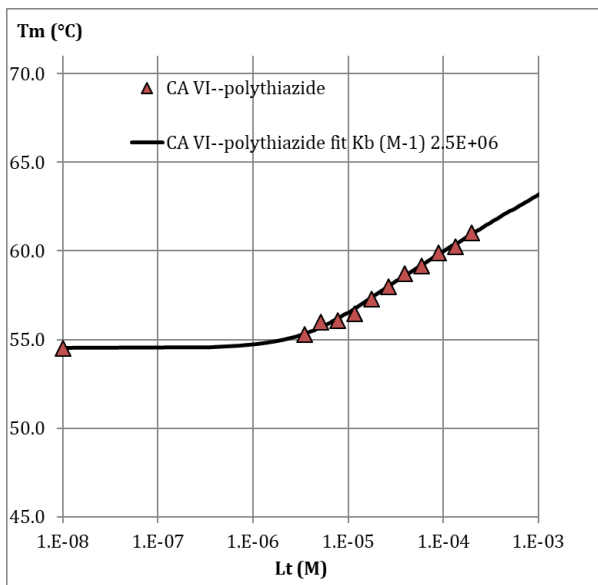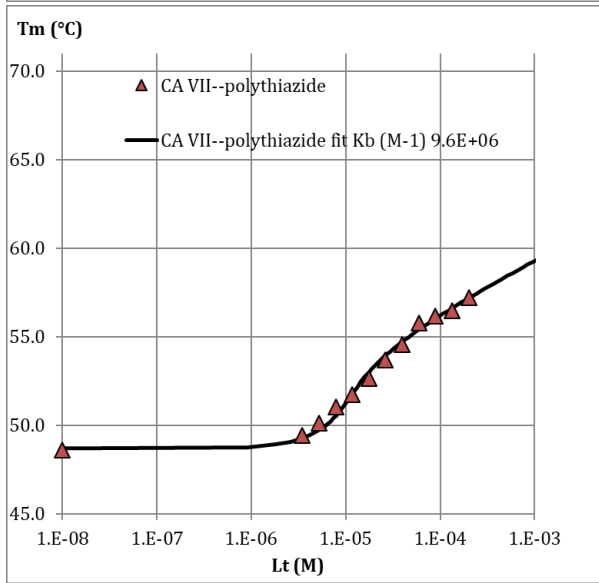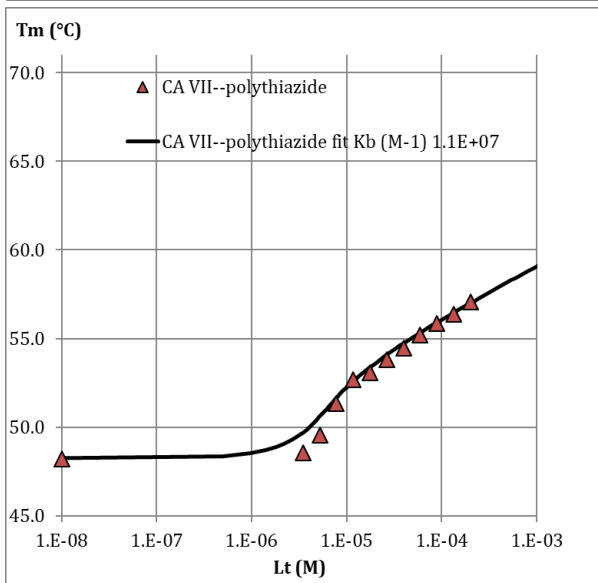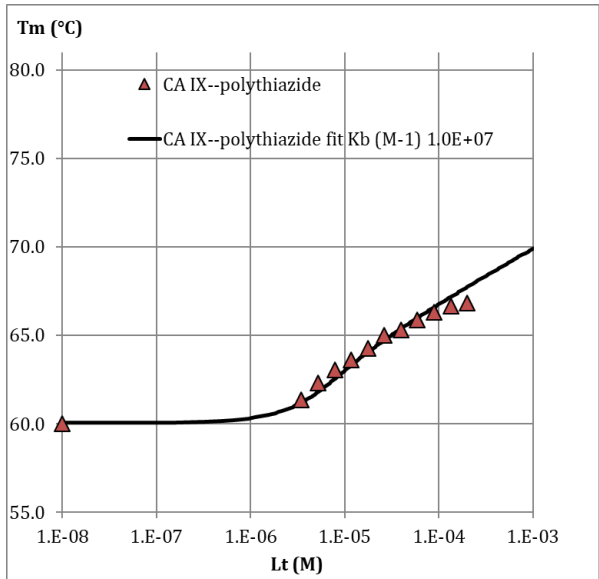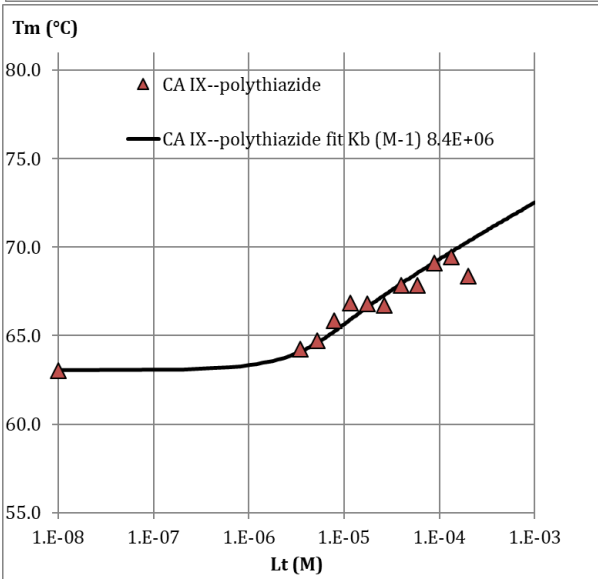

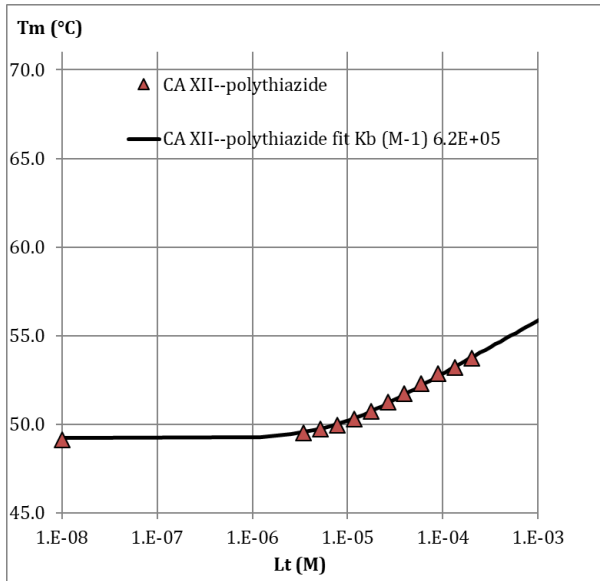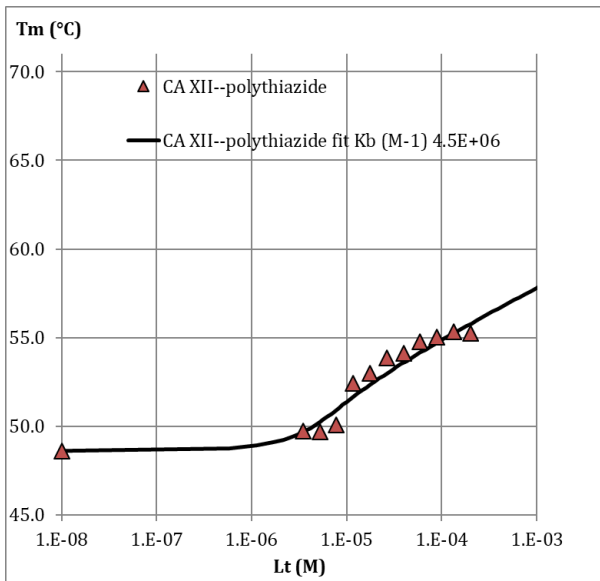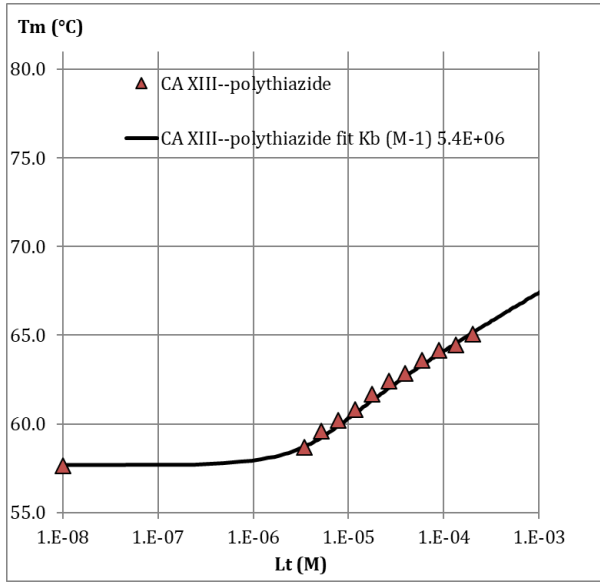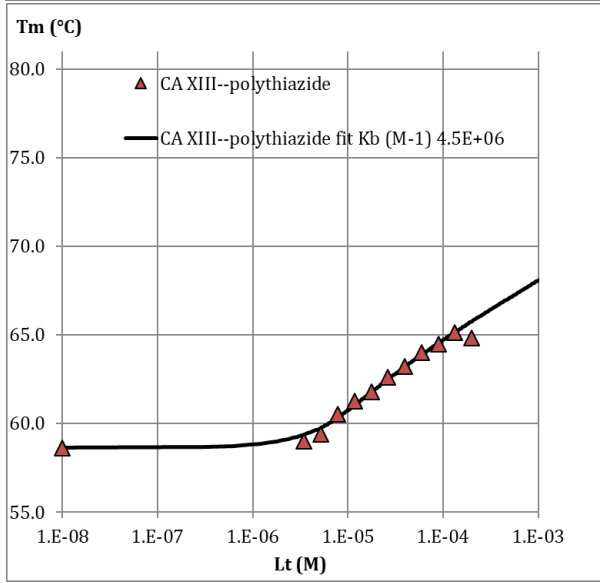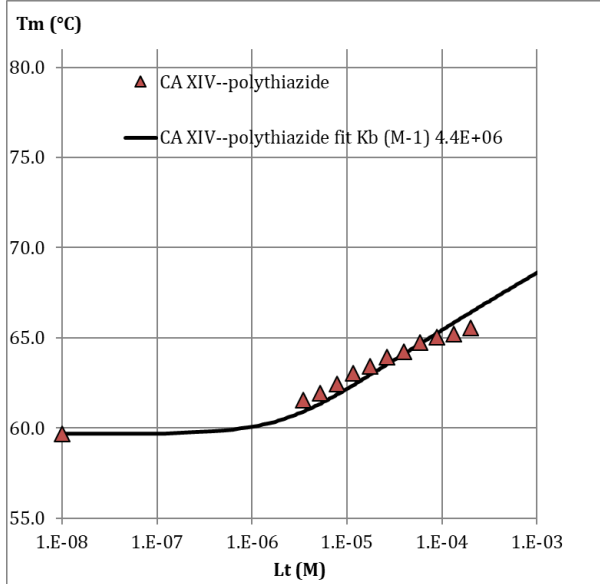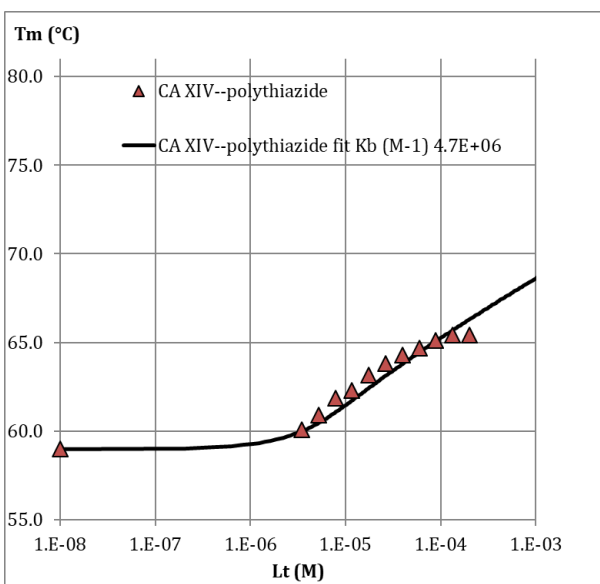

# 8. Benzthiazide

## Fluorecence-based thermal shift assay

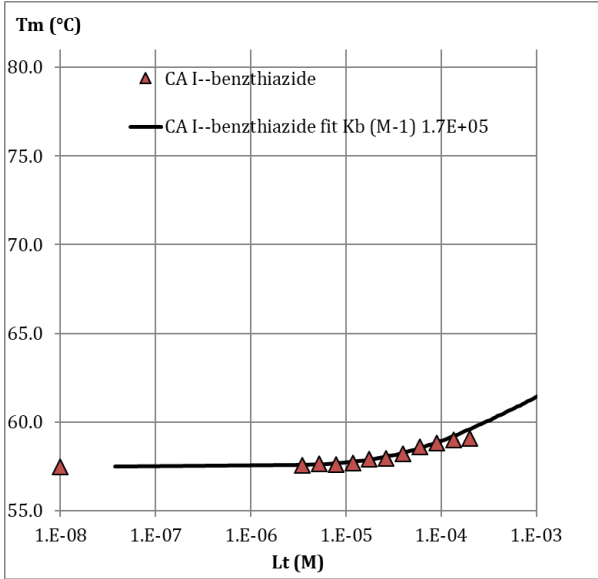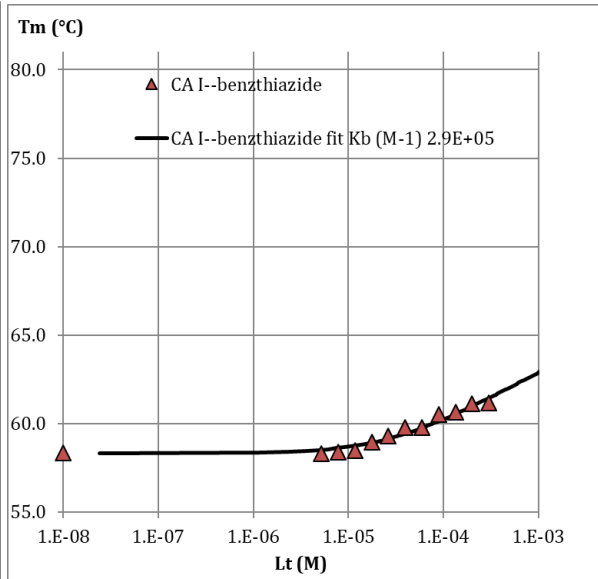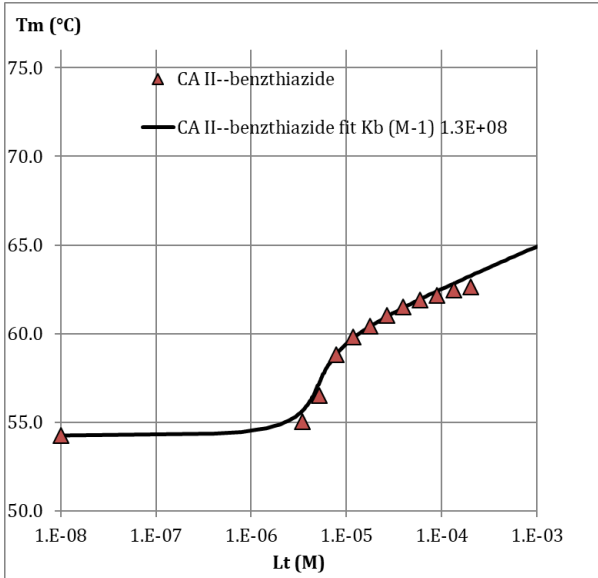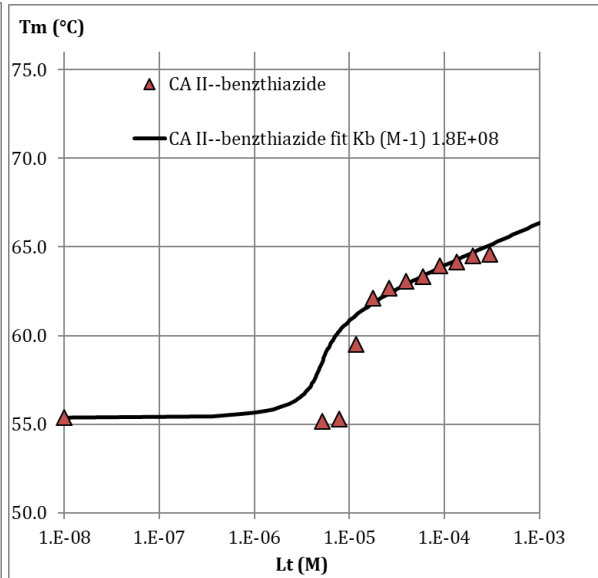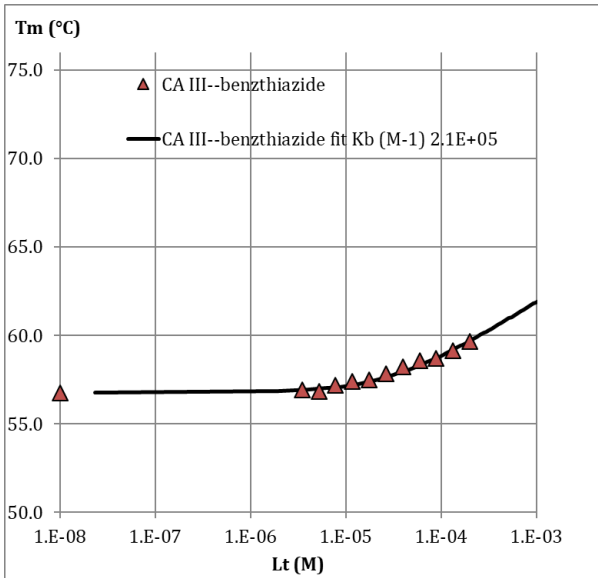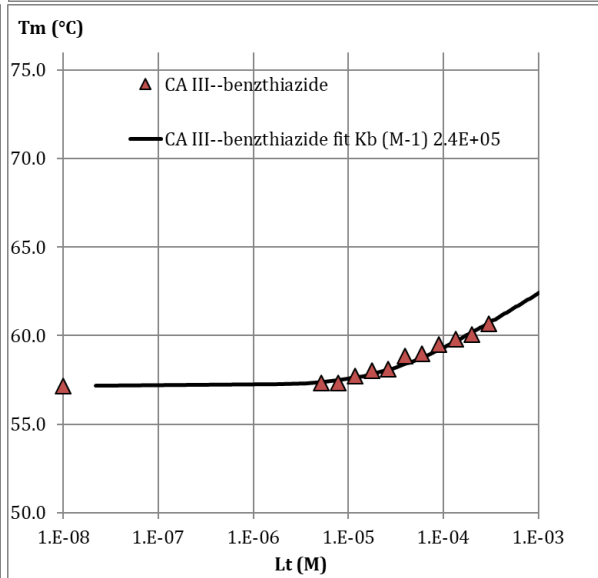



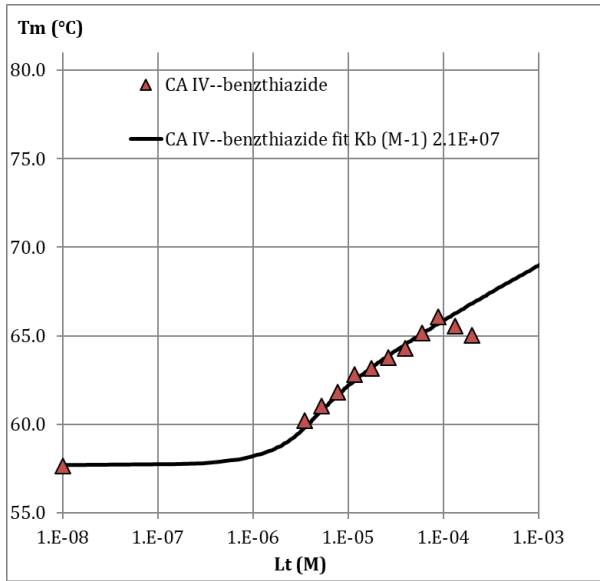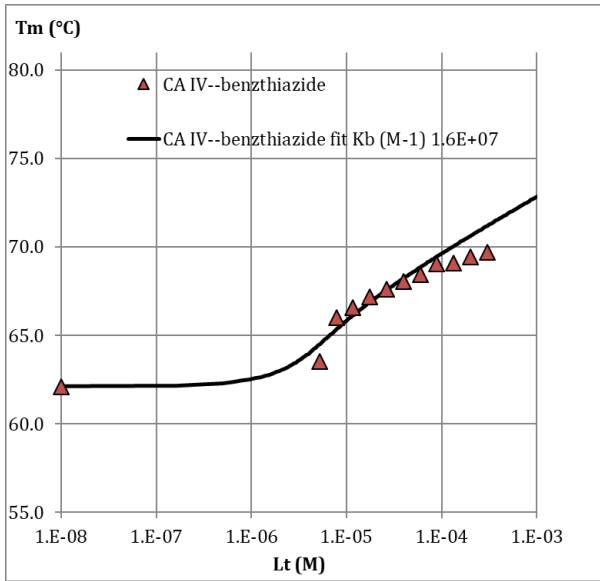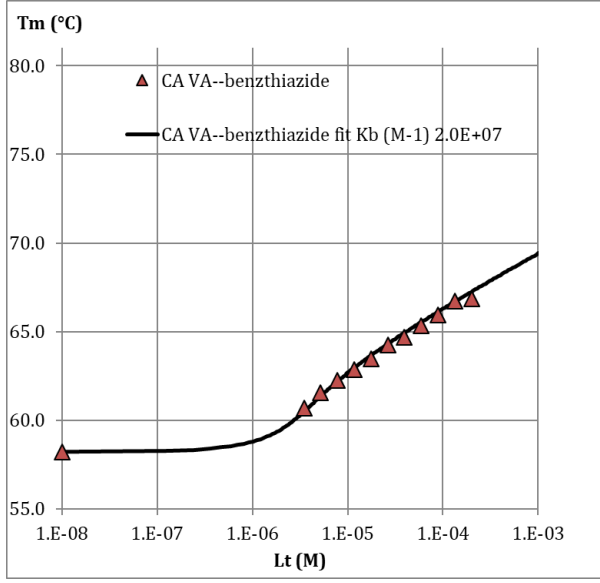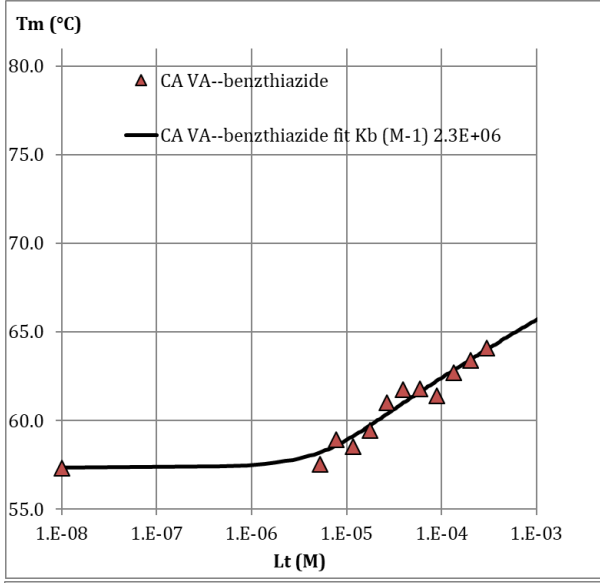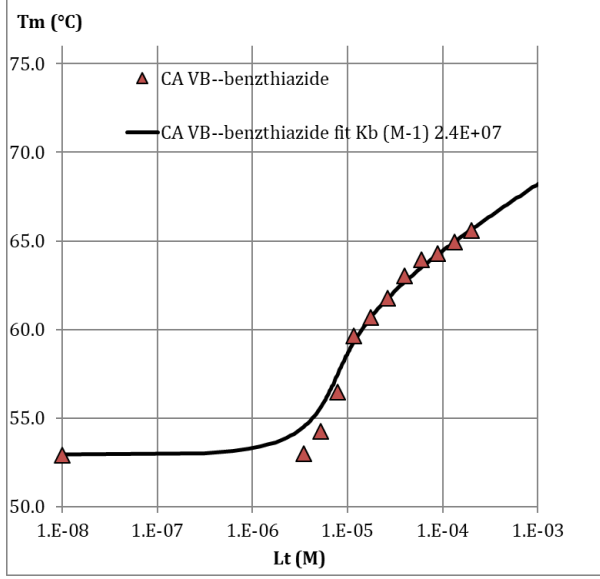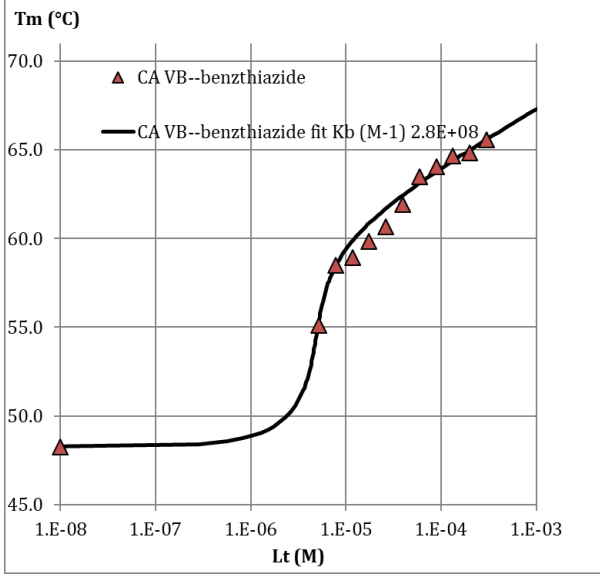

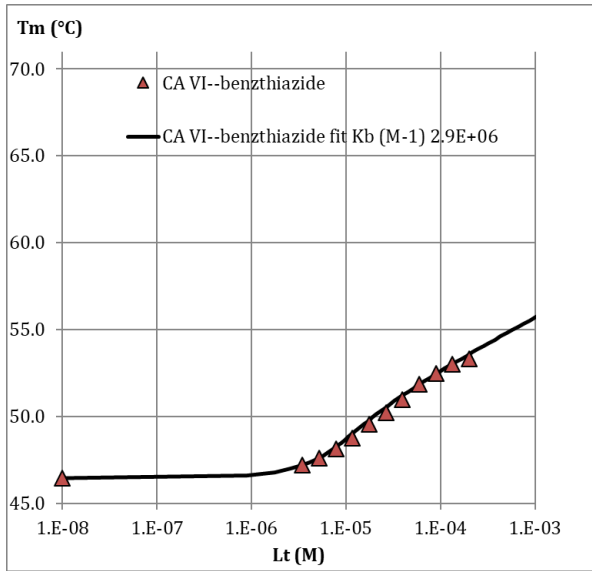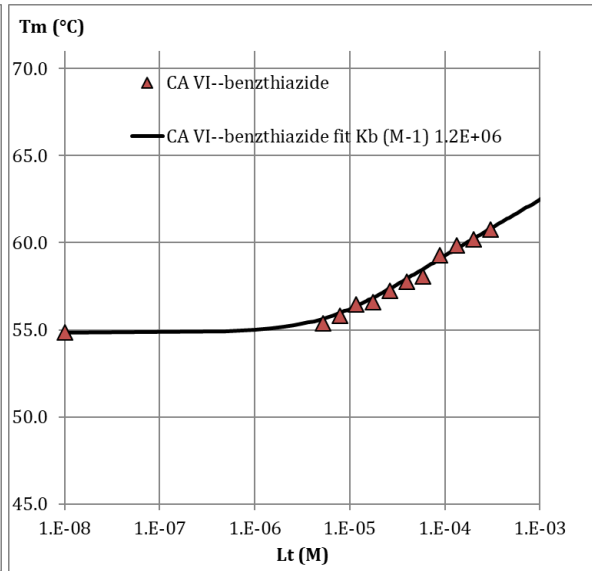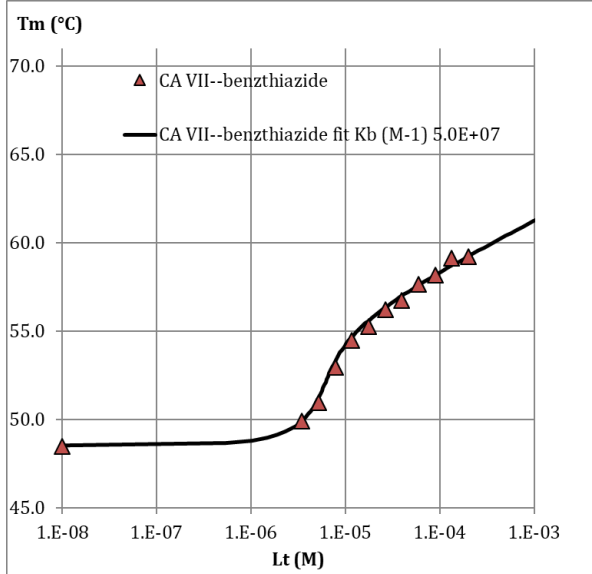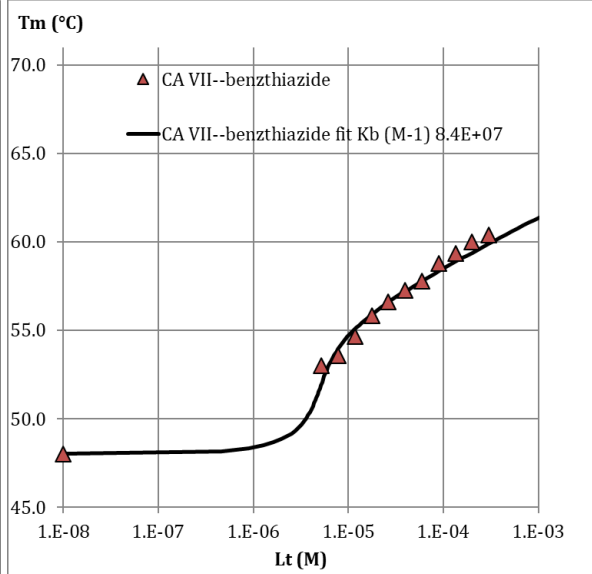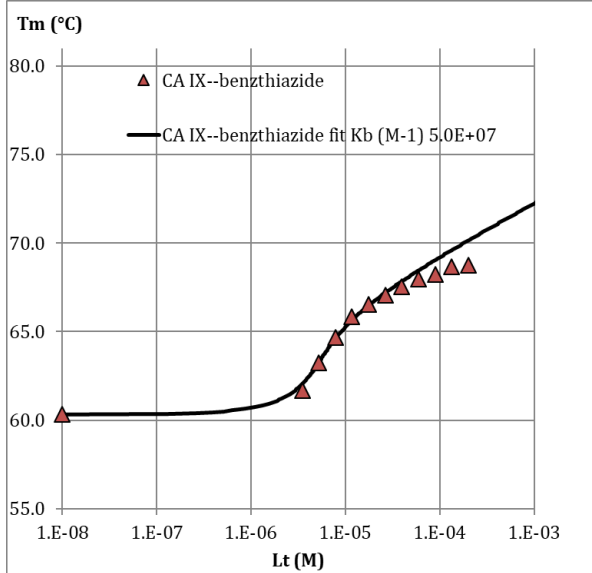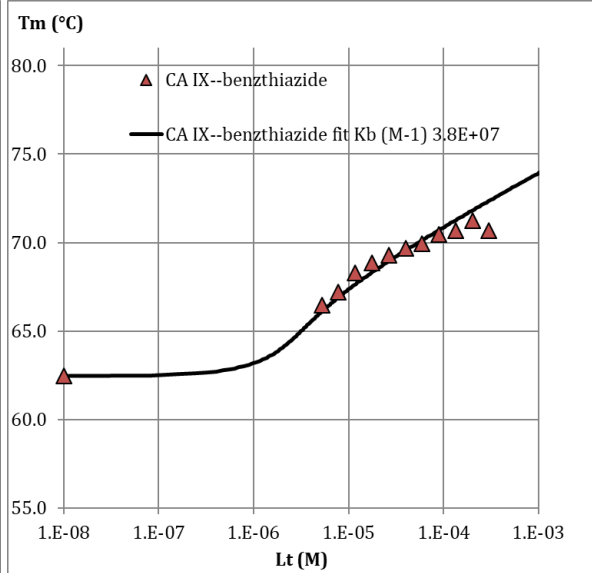

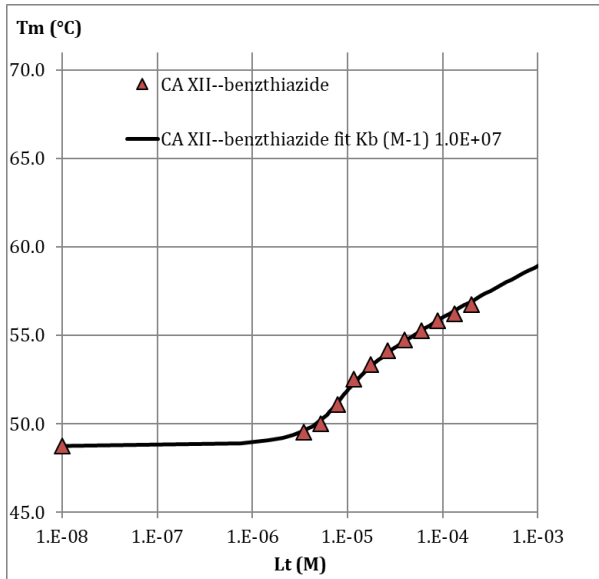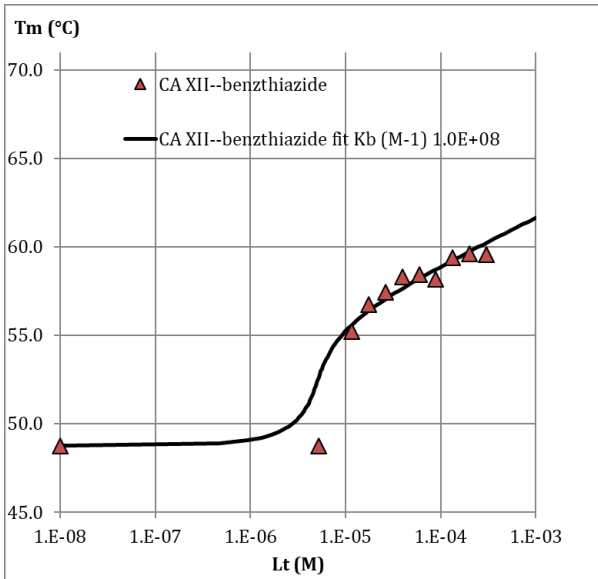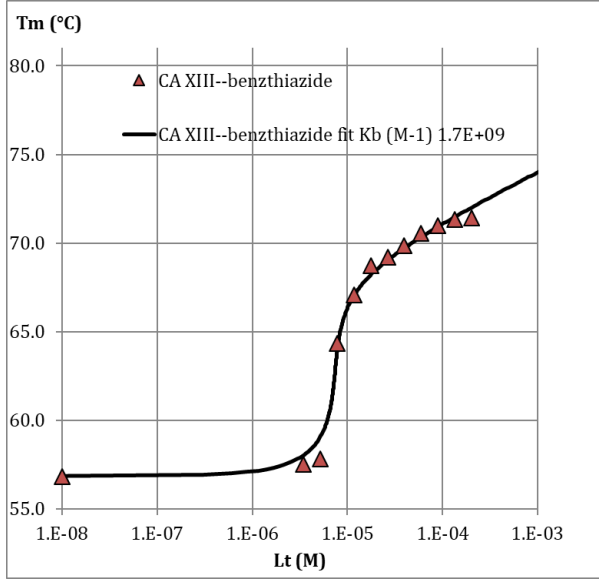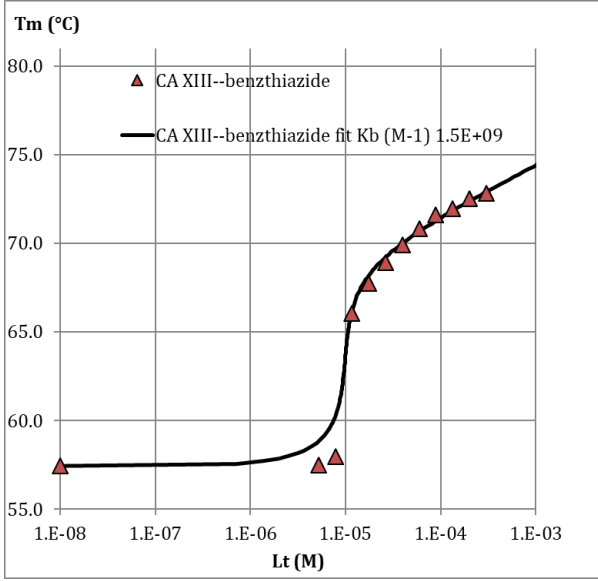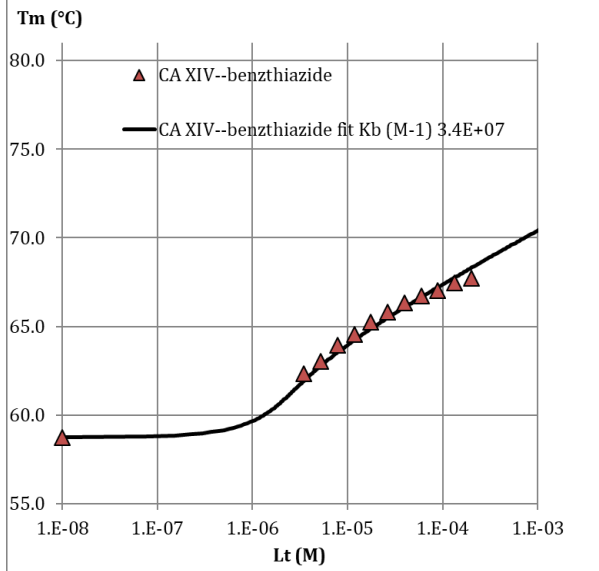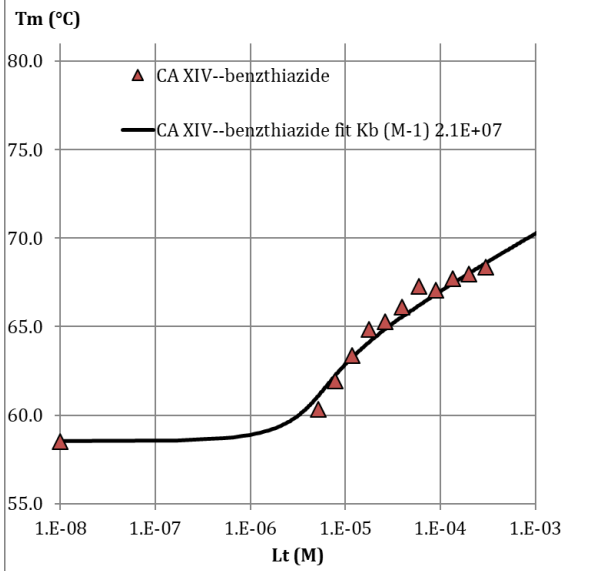

# Isothermal titration calorimetry

## CA II – benzthiazide

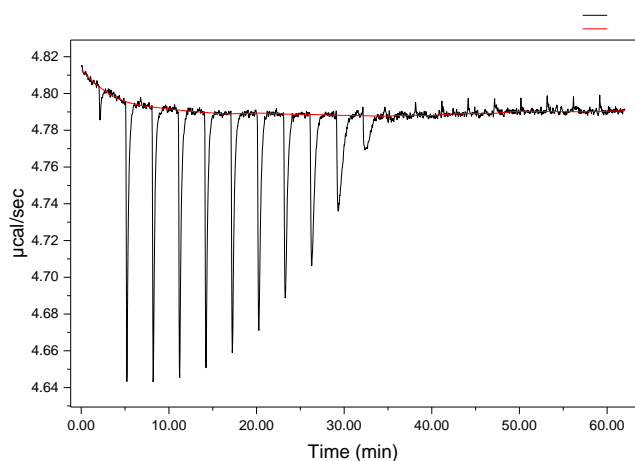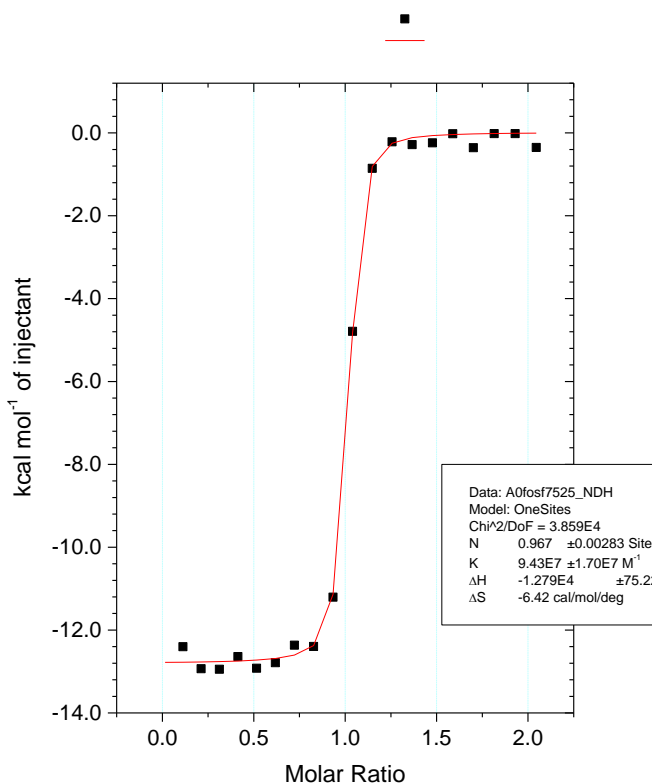

## CA II – benzthiazide

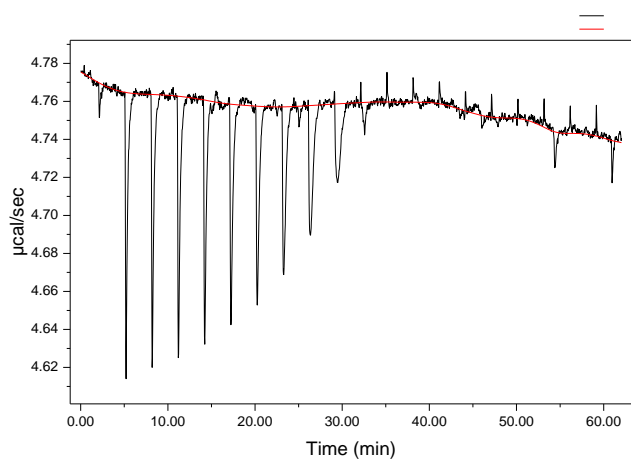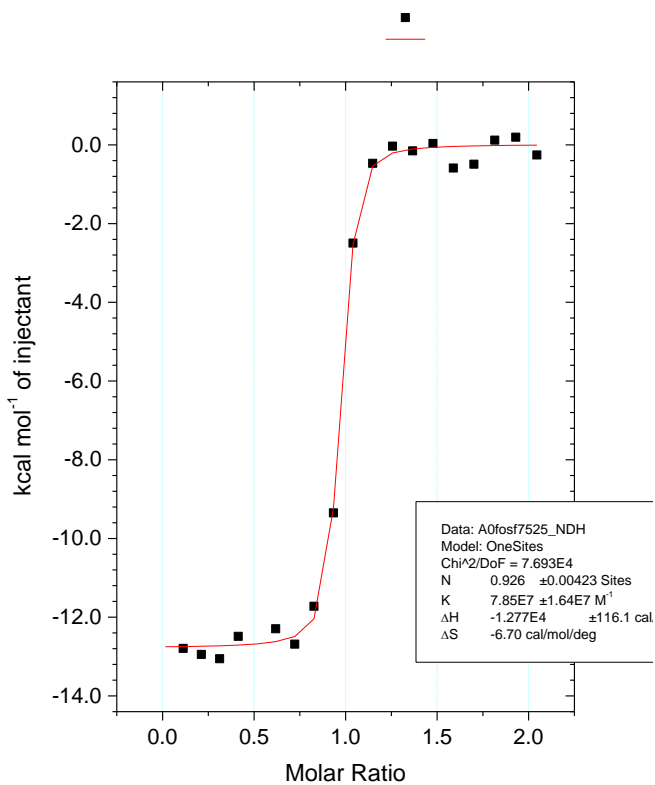

# 9. Athiazide

## Fluorence-based thermal shift assay

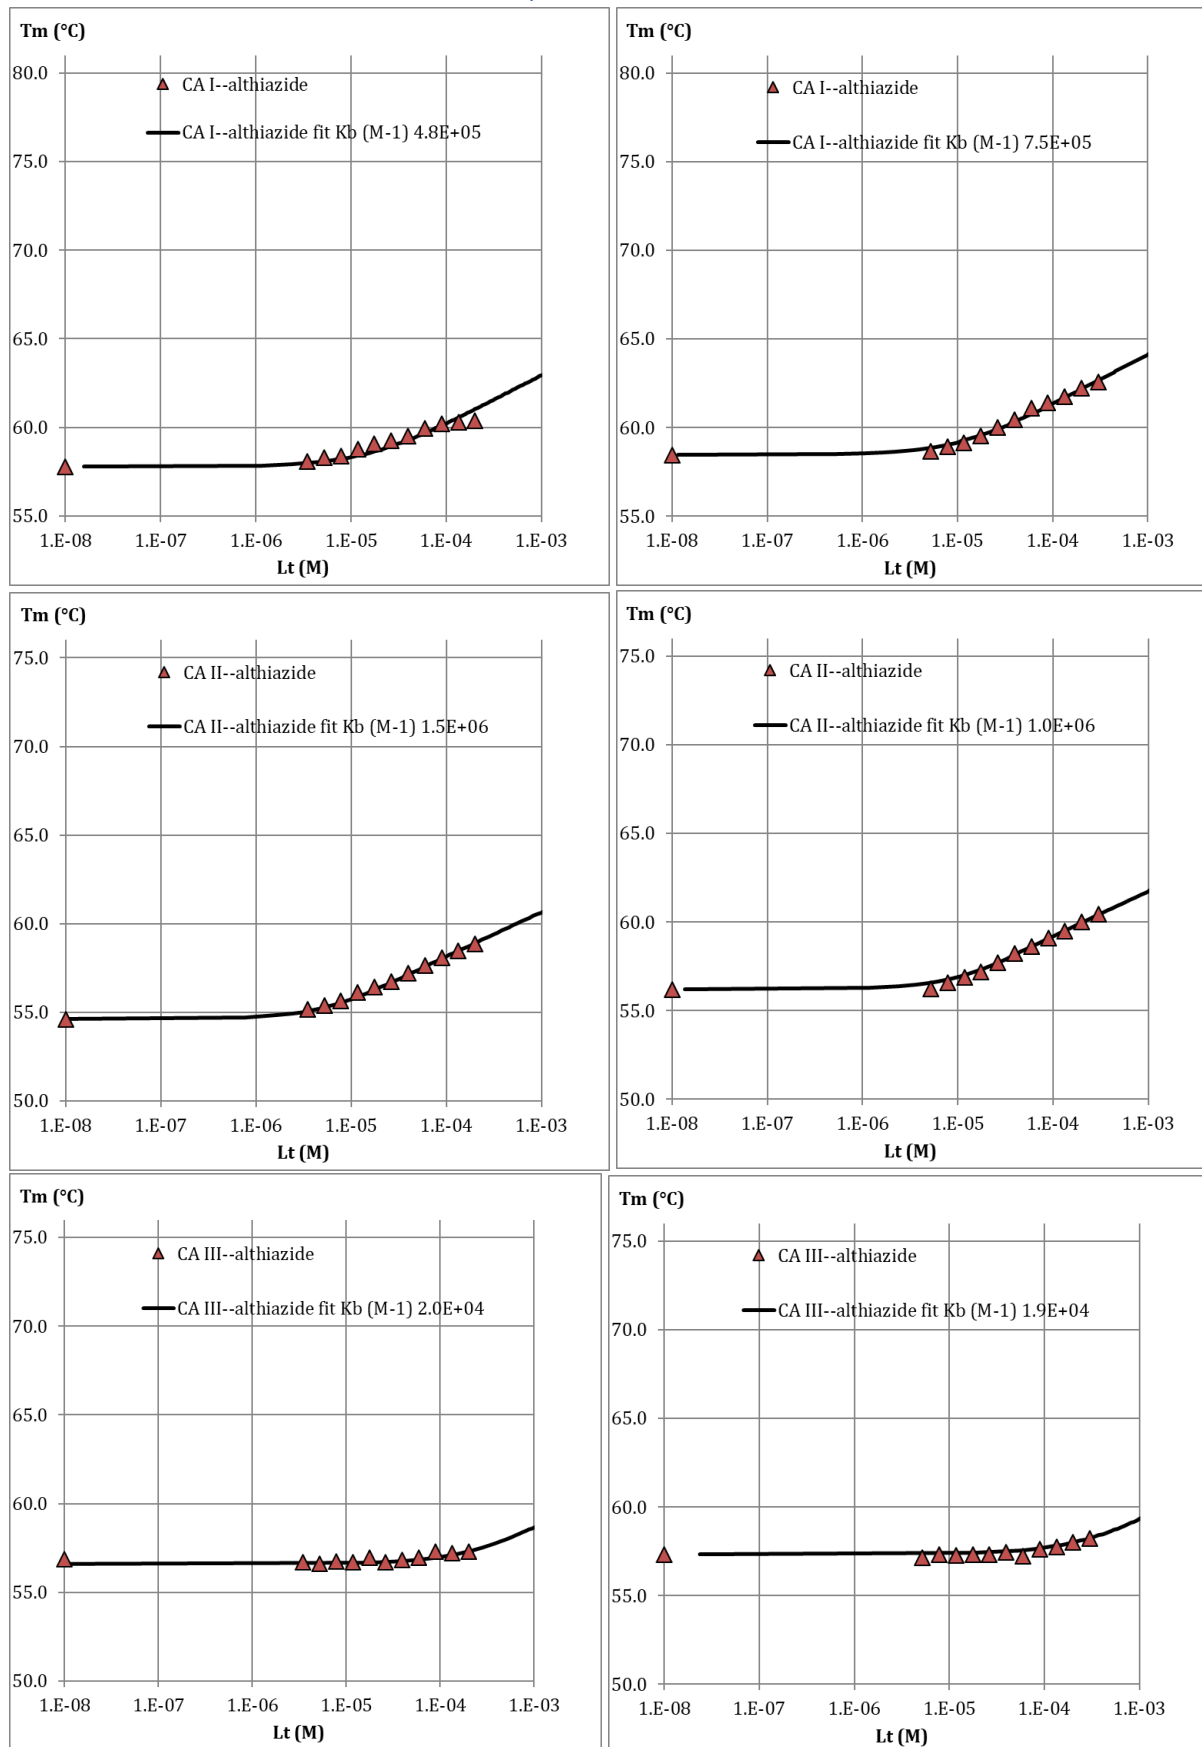

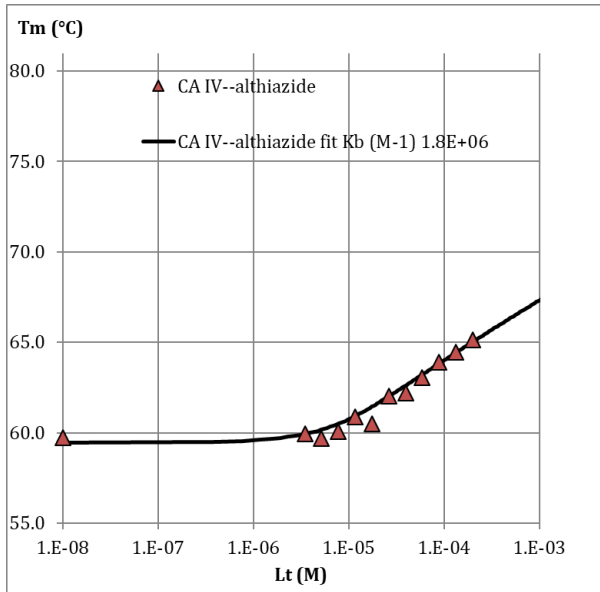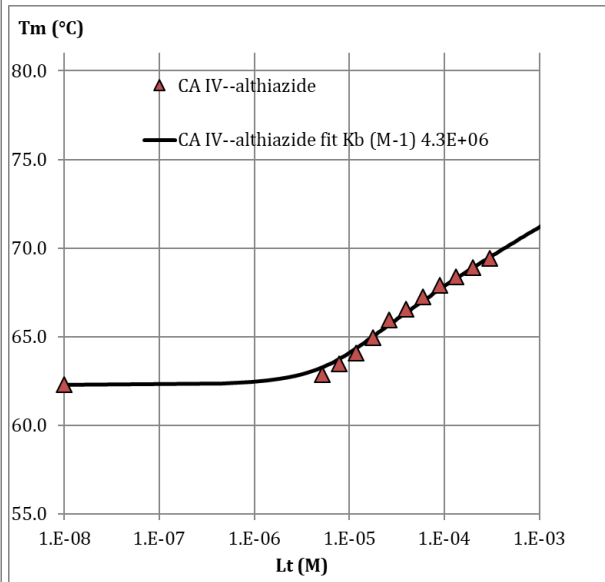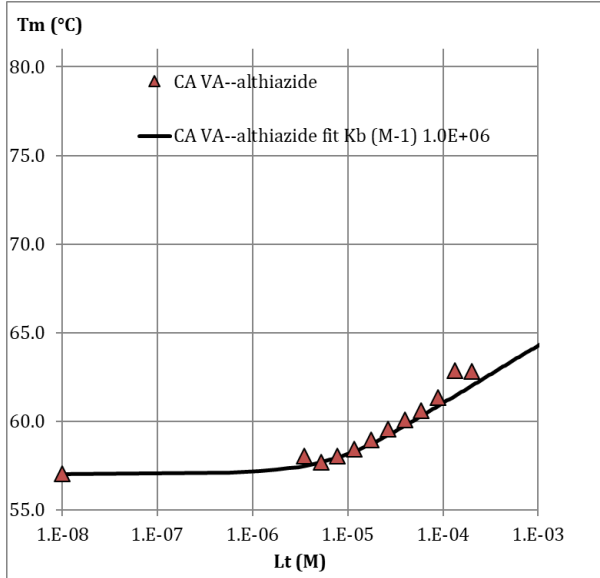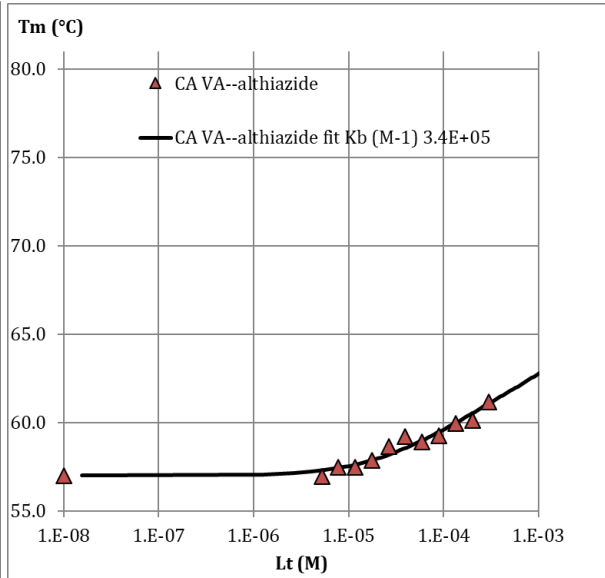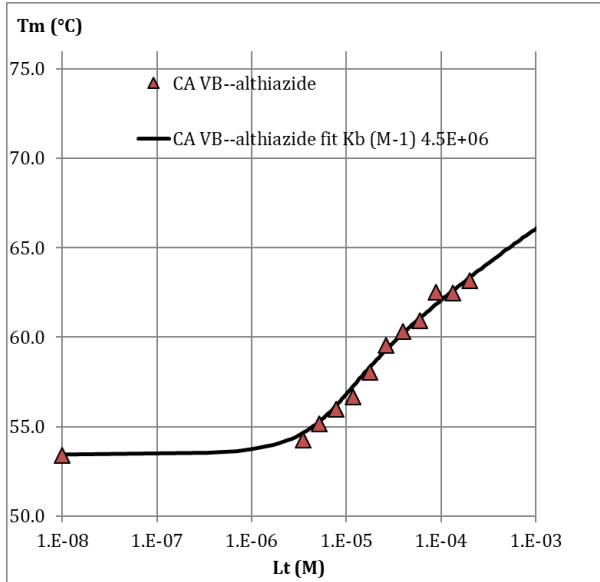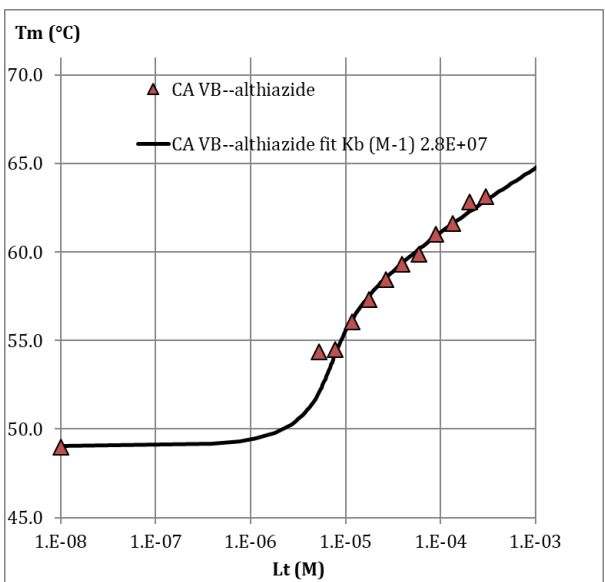

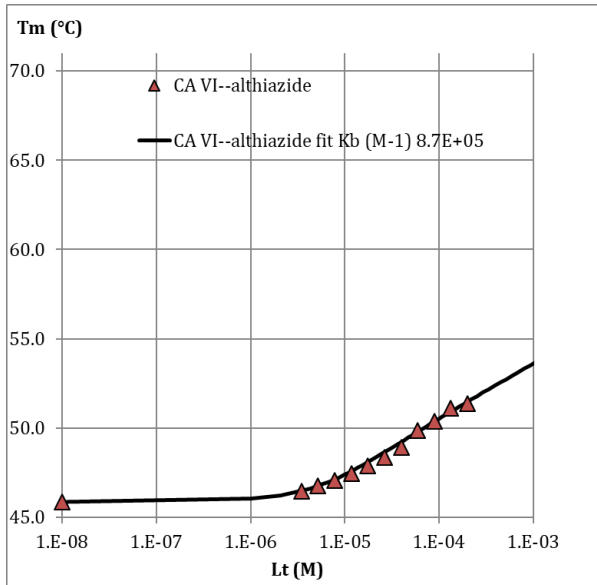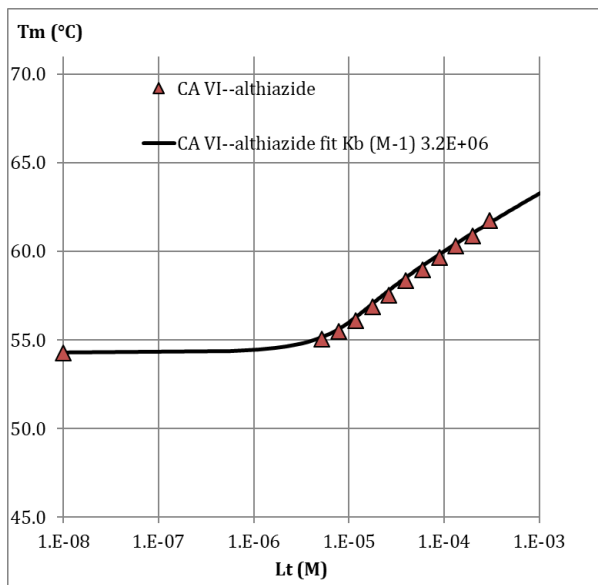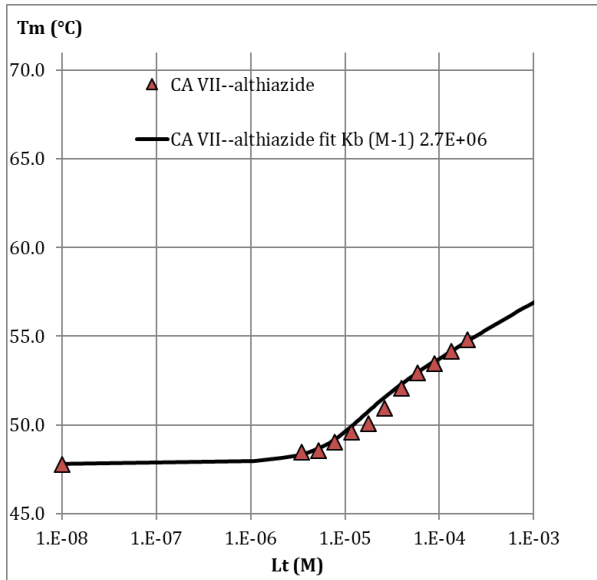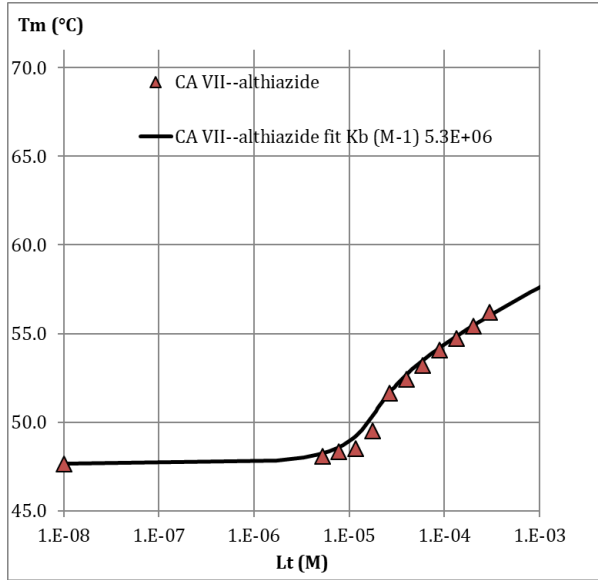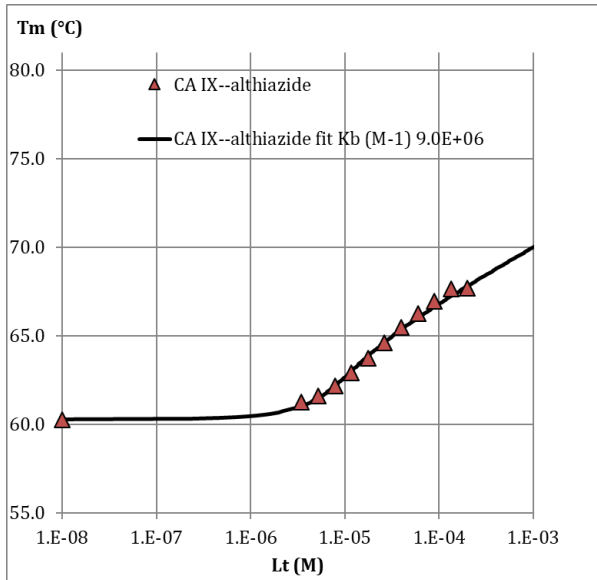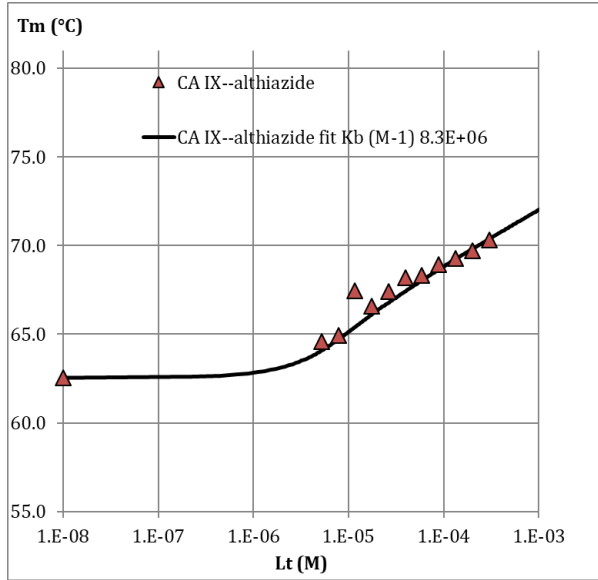

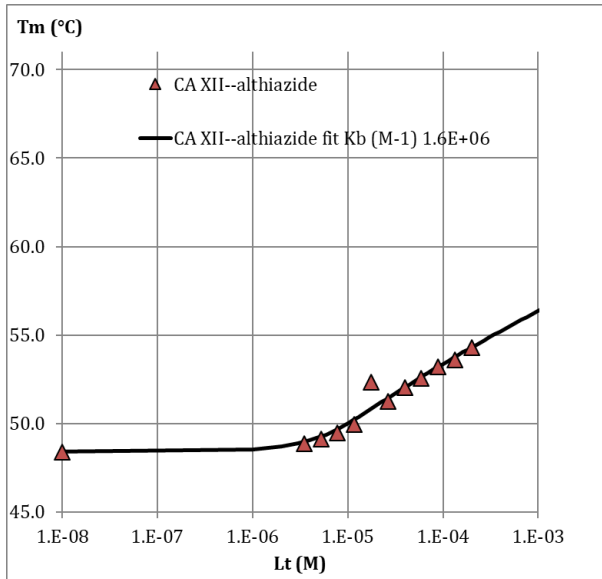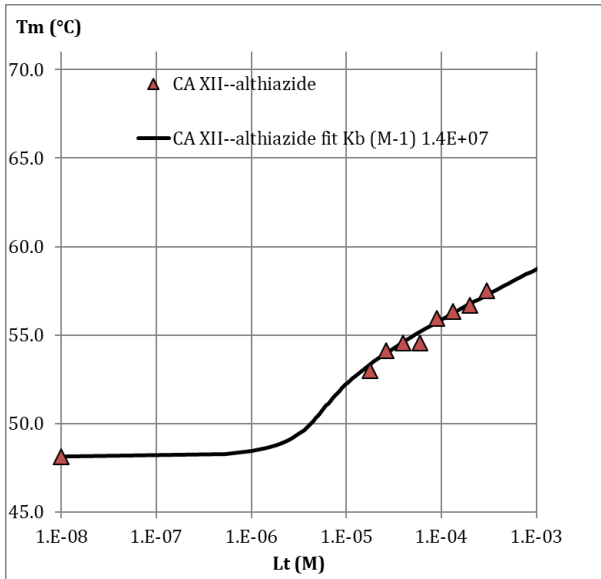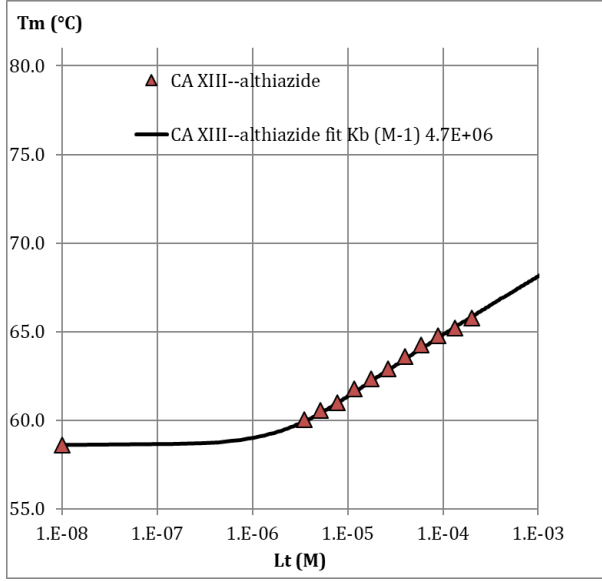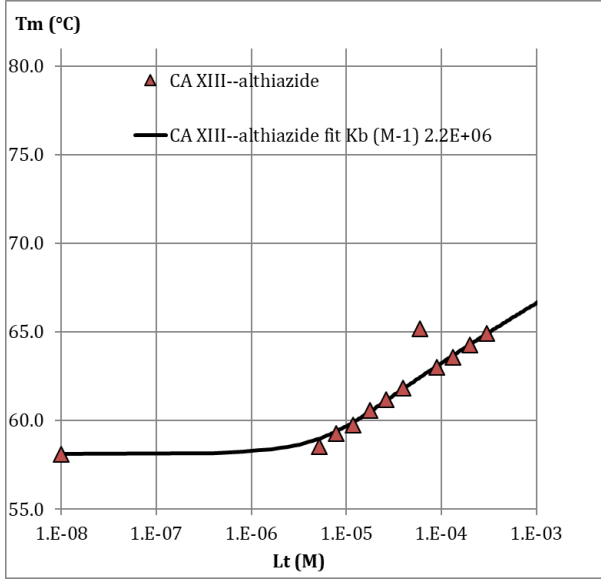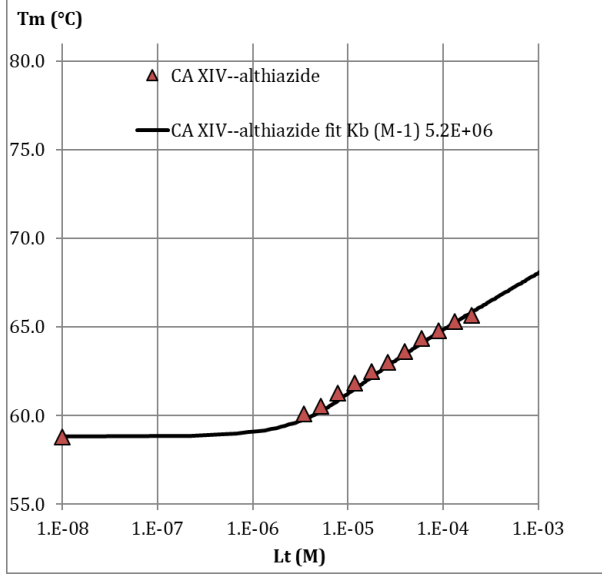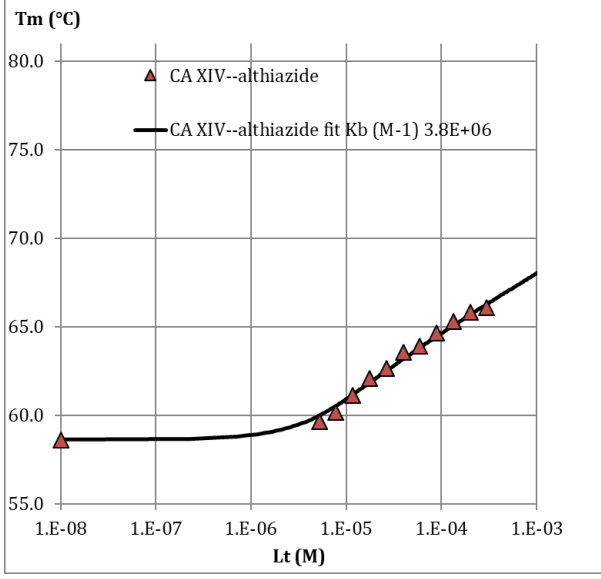



# Isothermal titration calorimetry

CA II- althiazide

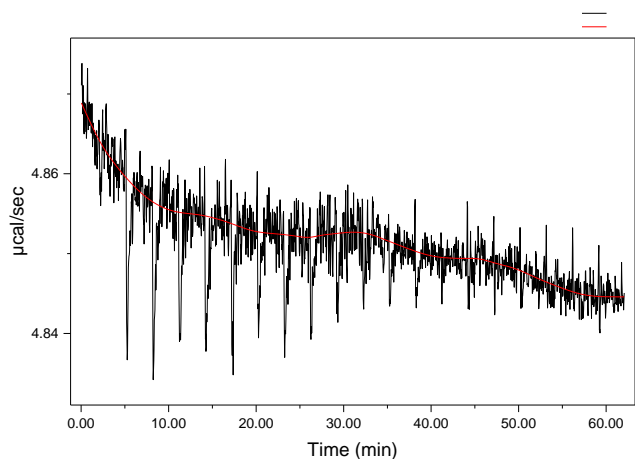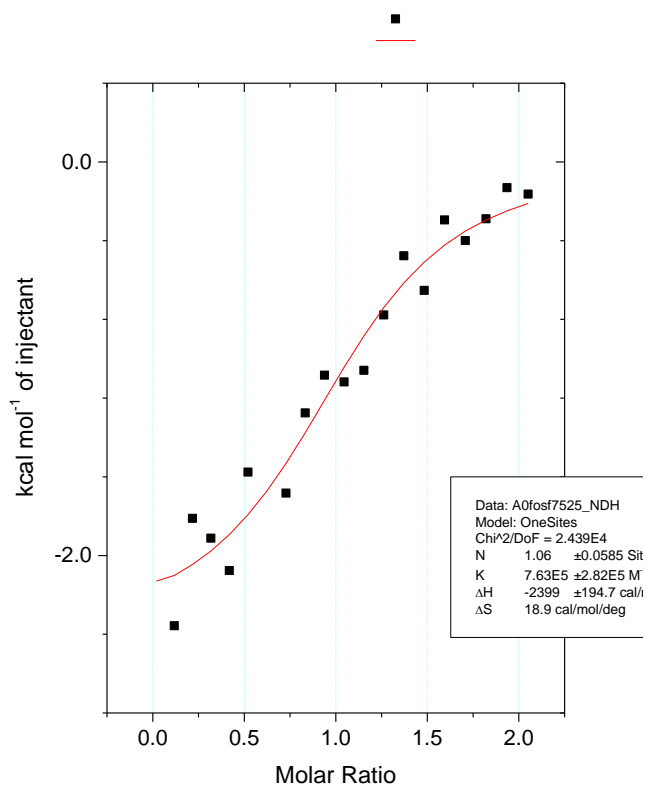

CA II- althiazide

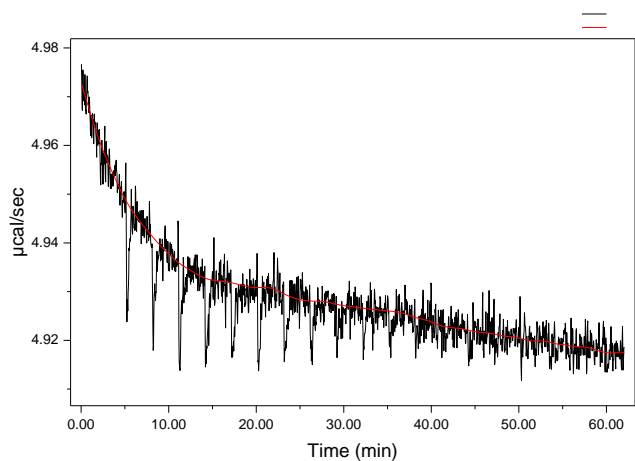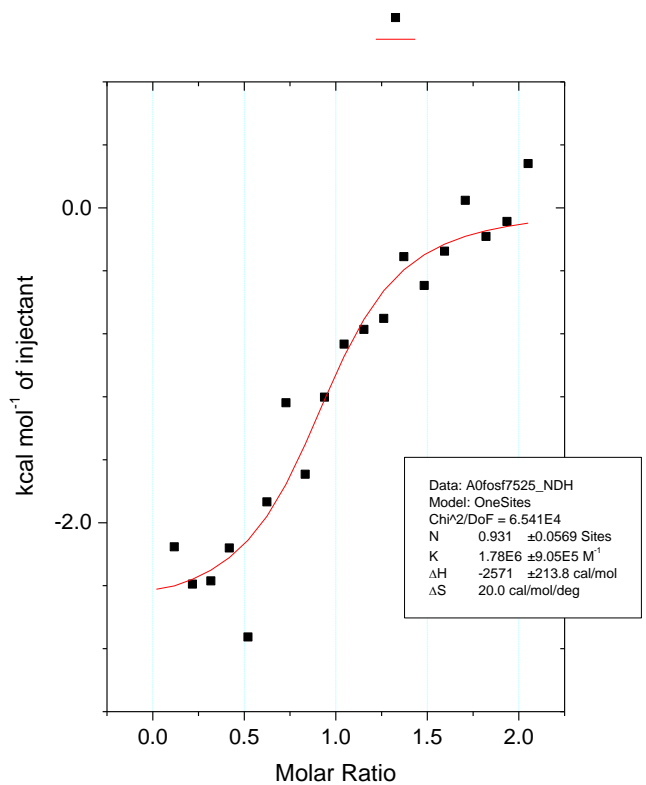

# 10. Hydroflumethiazide

## Fluorence-based thermal shift assay

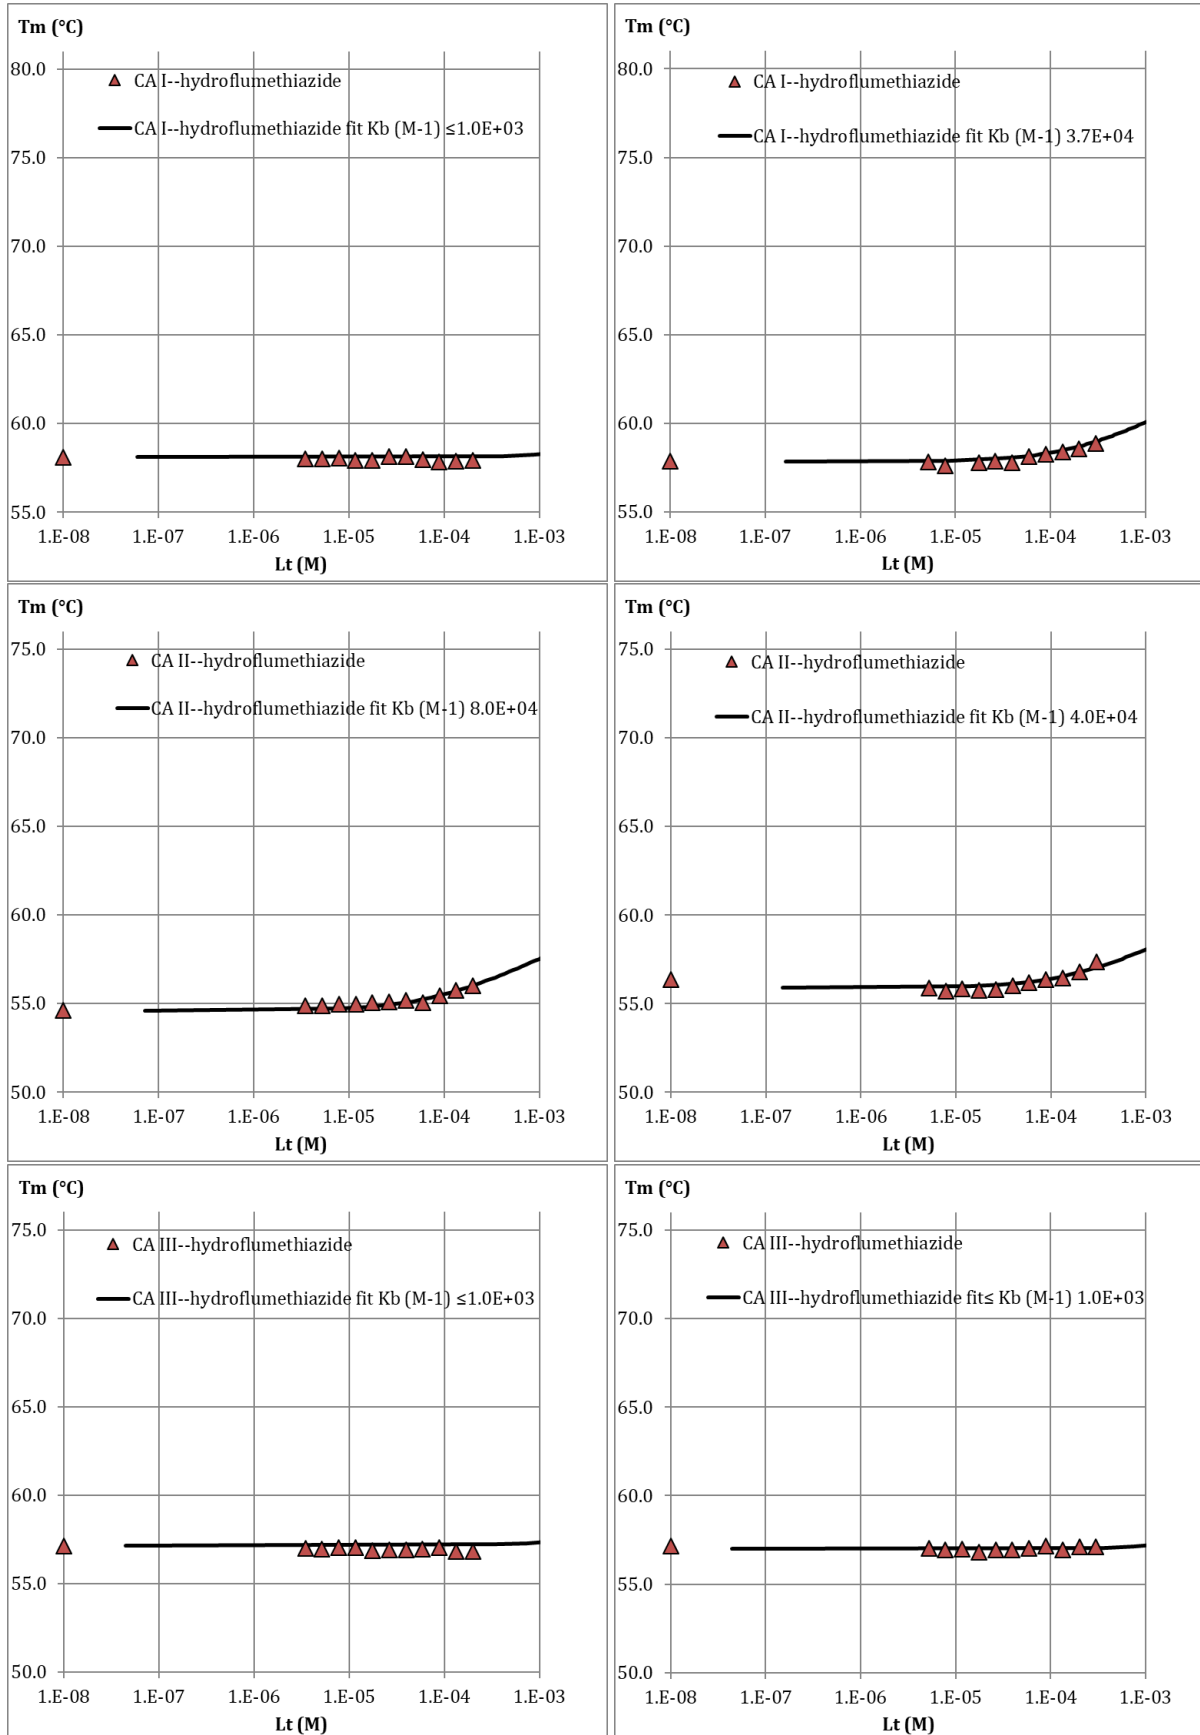

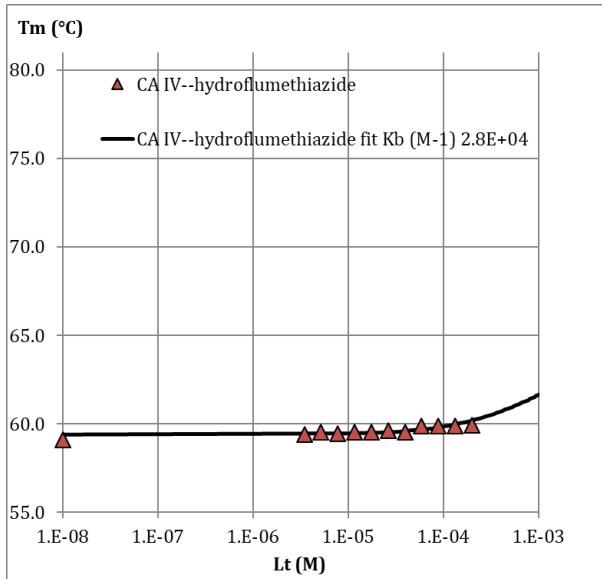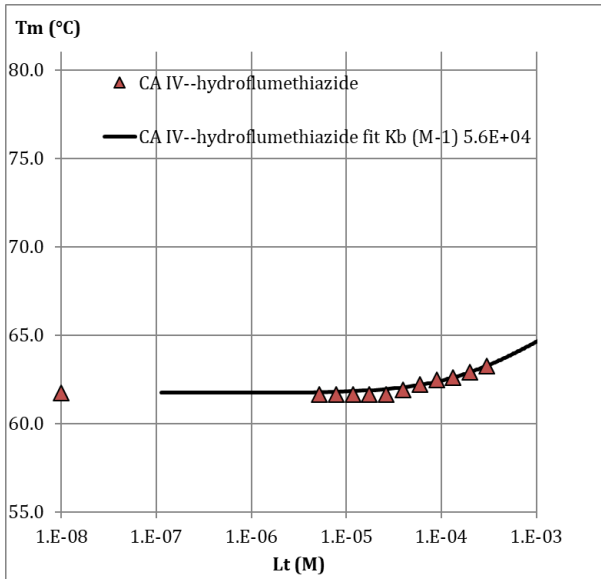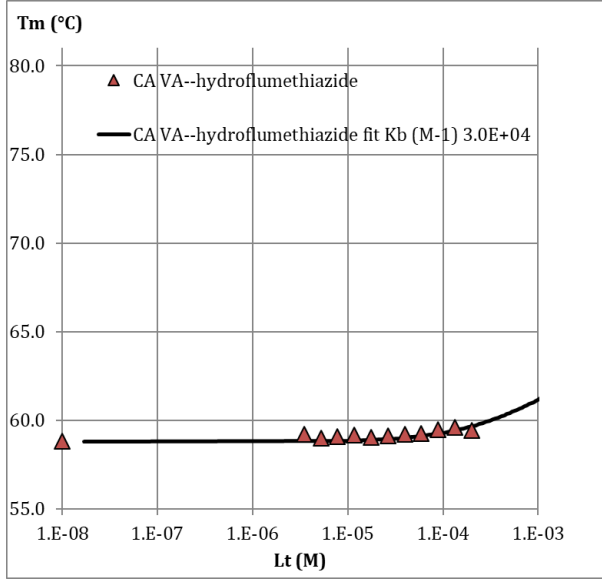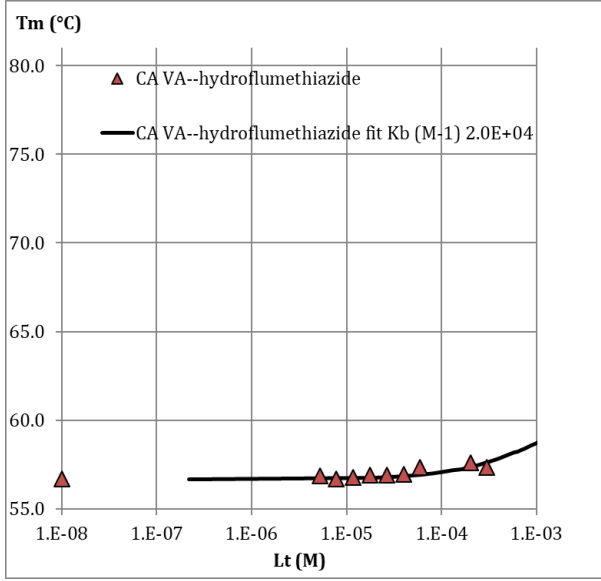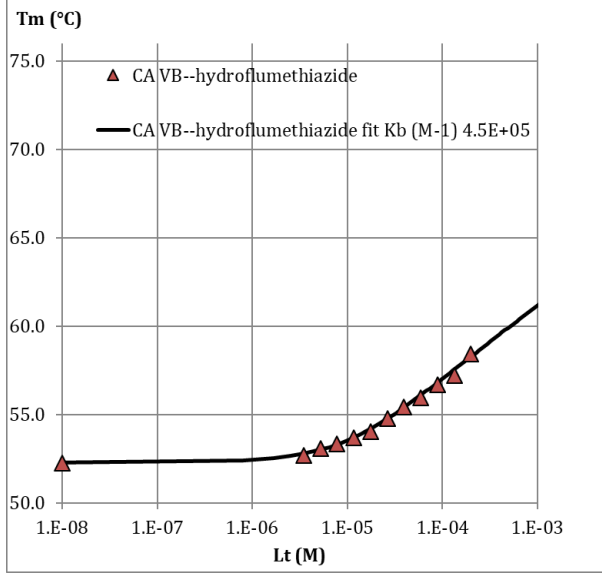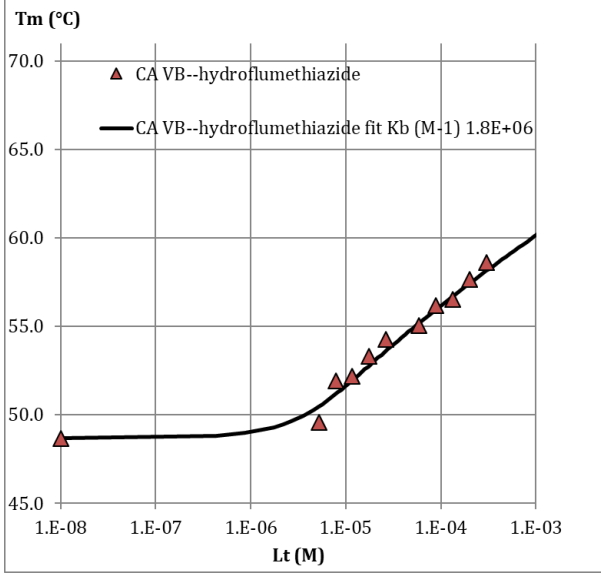

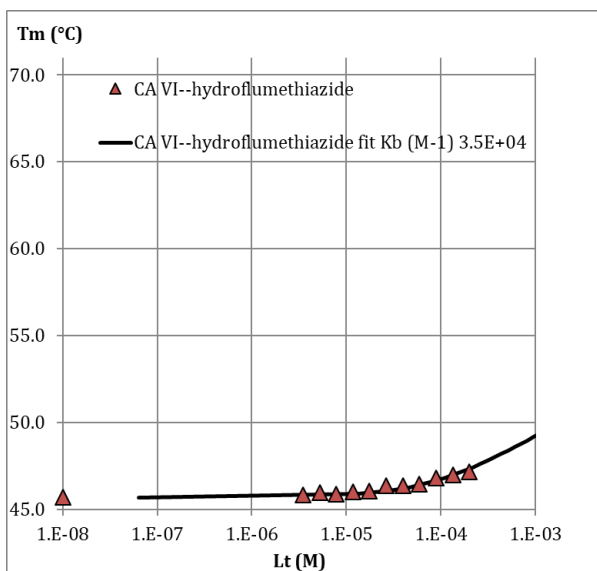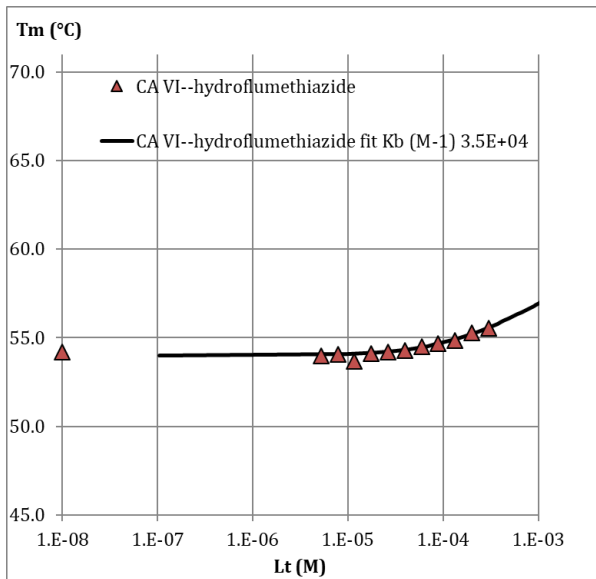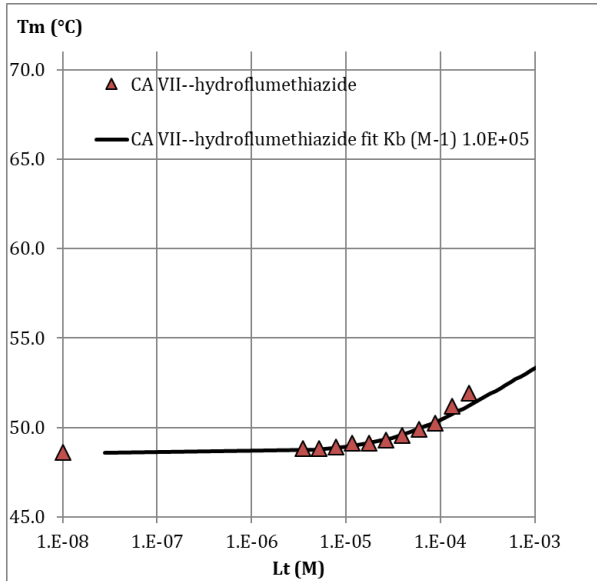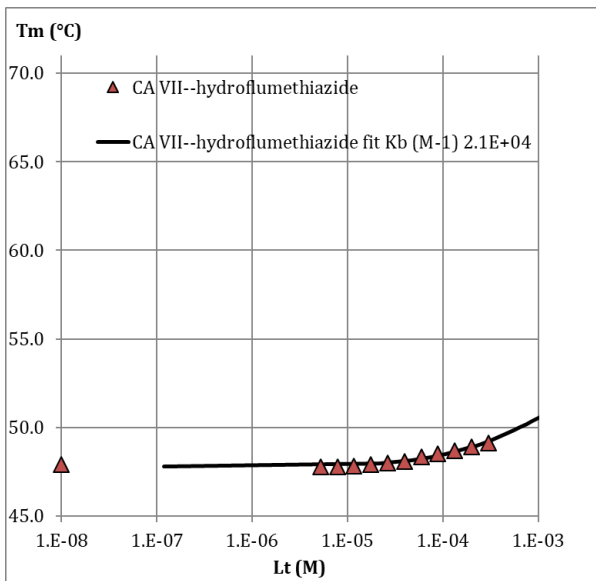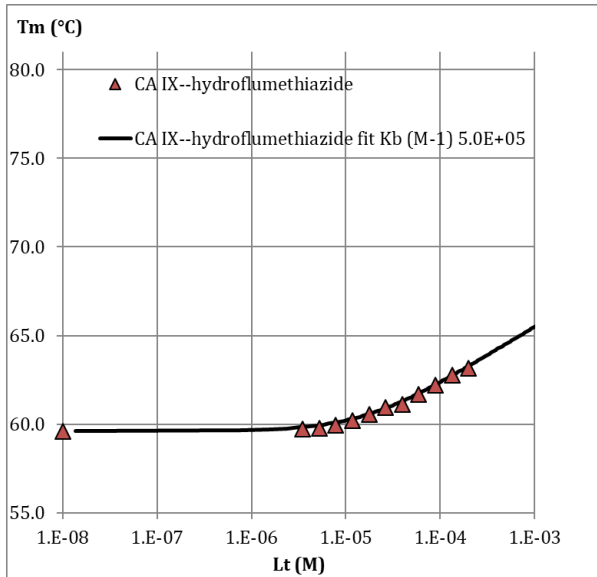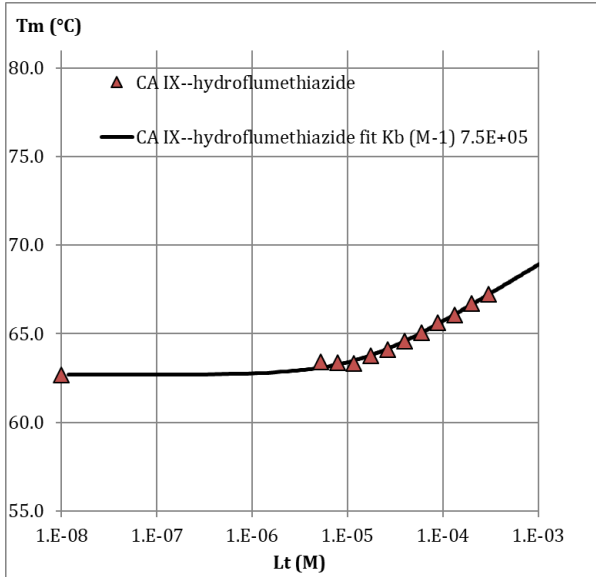

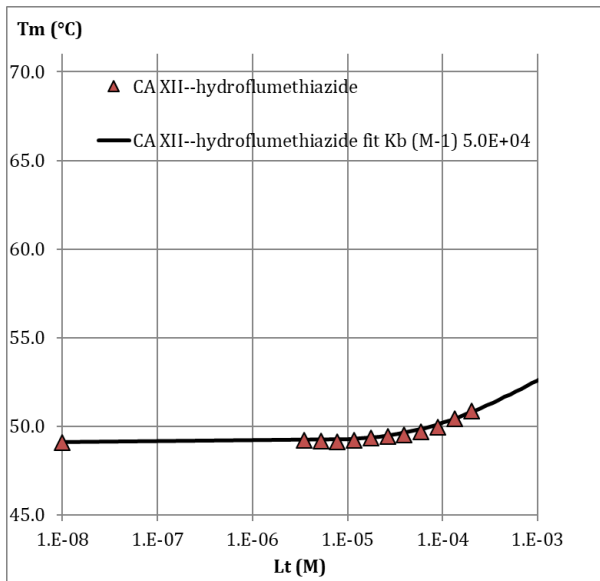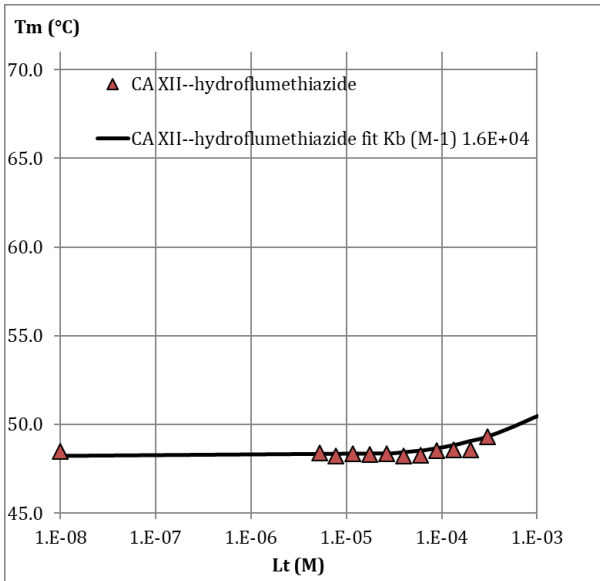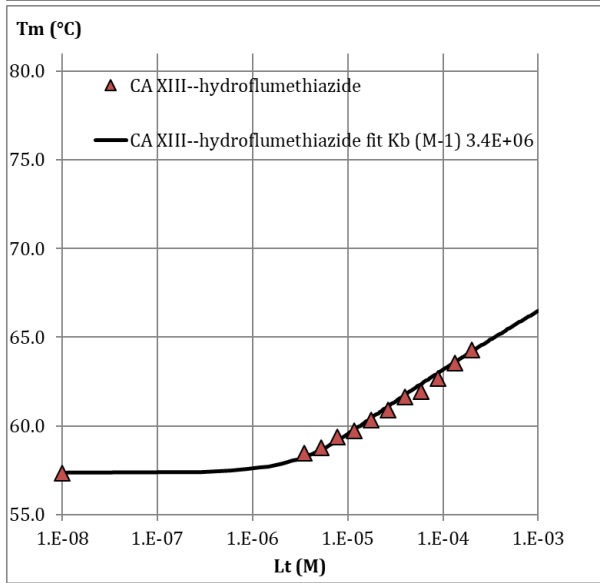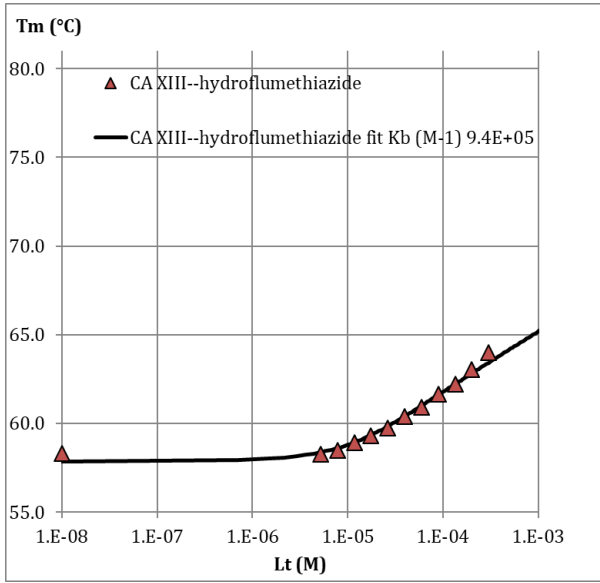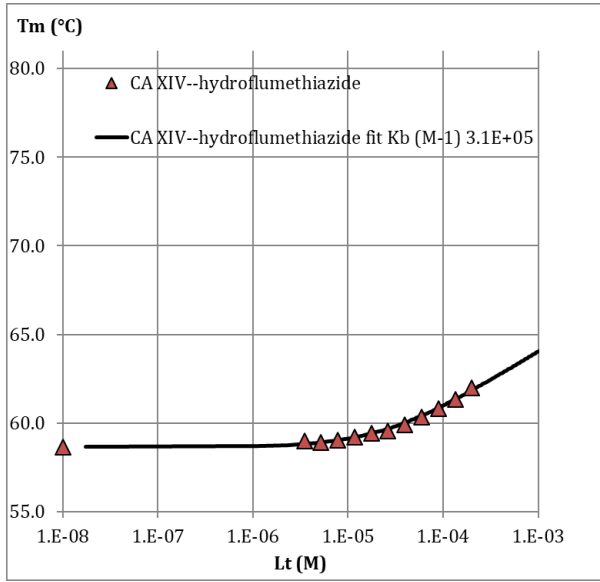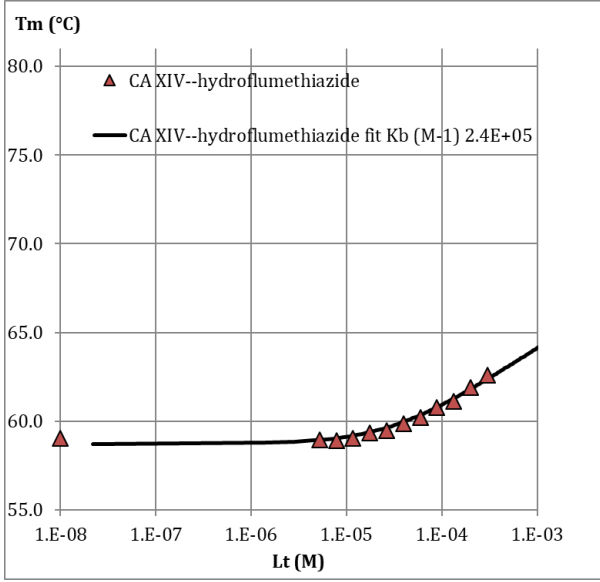

# 11. Bendroflumethiazide

## Fluorecence-based thermal shift assay

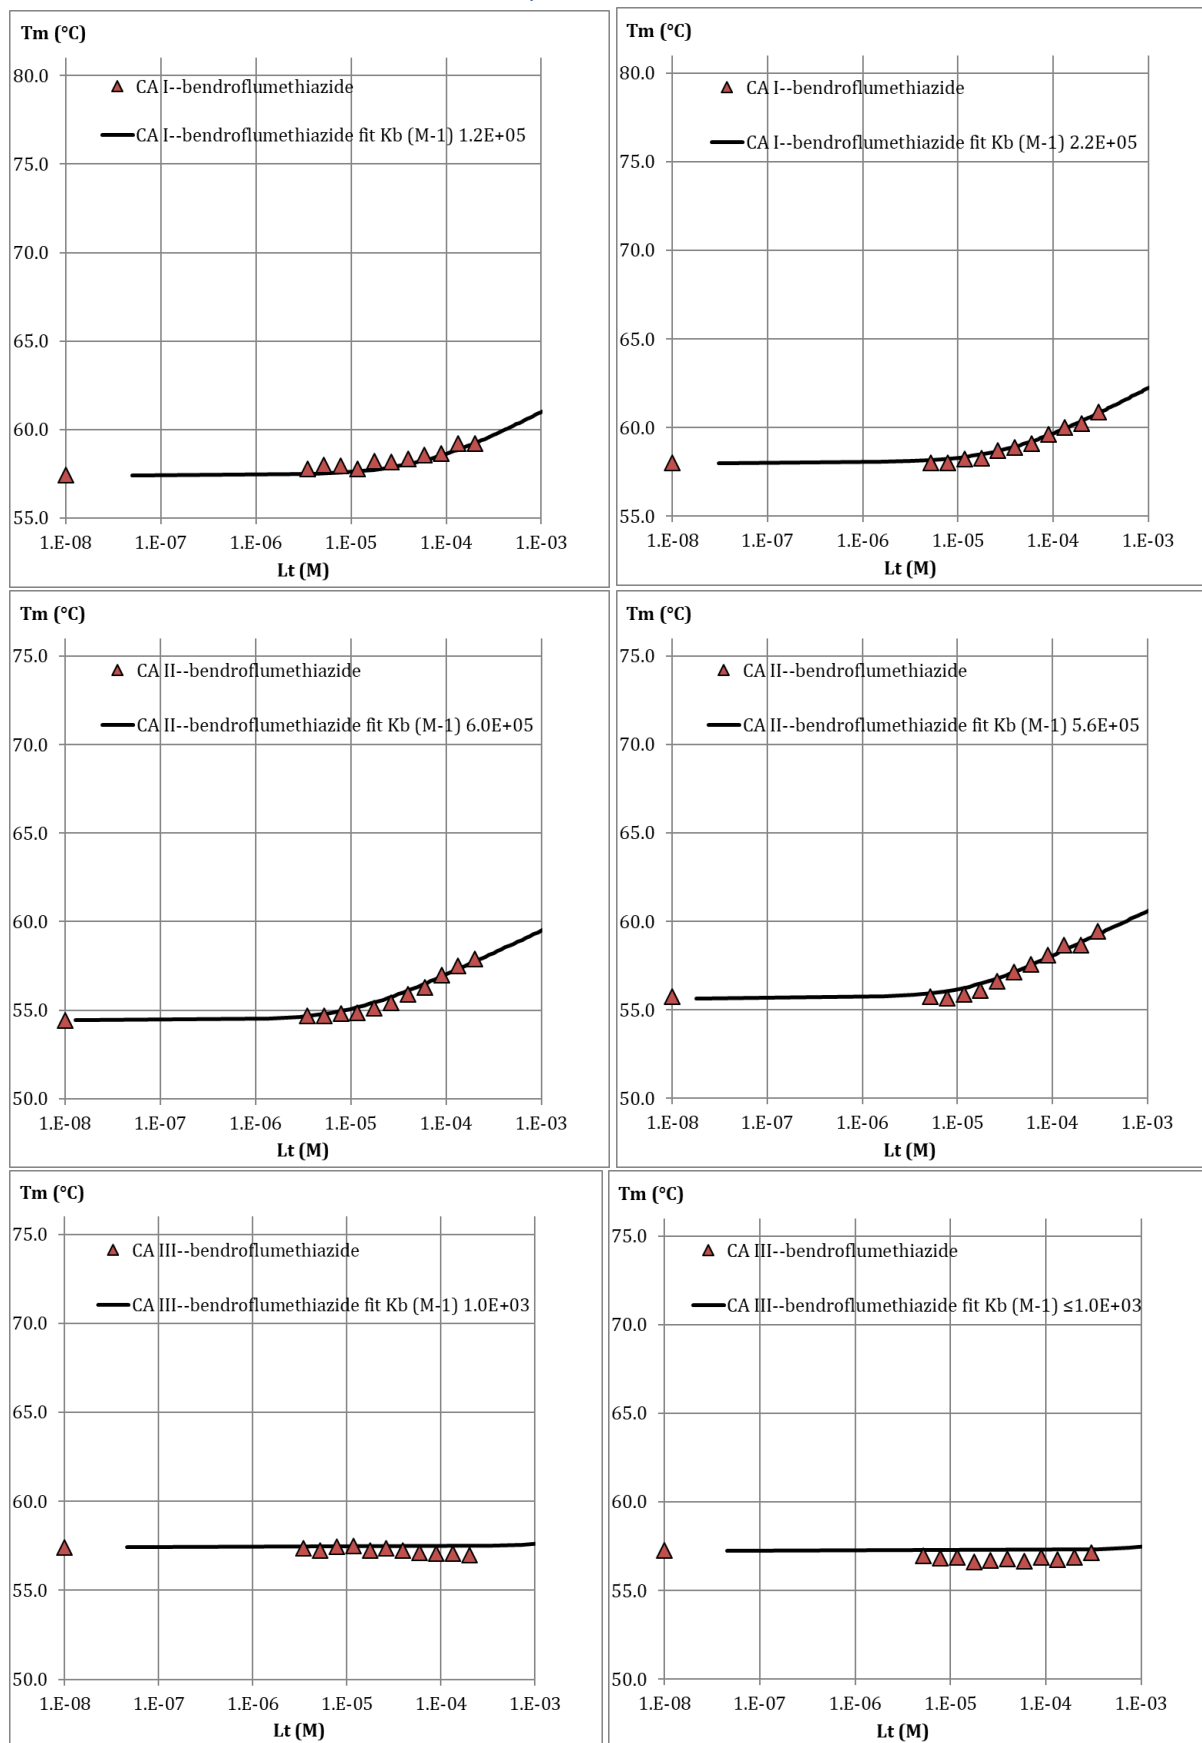

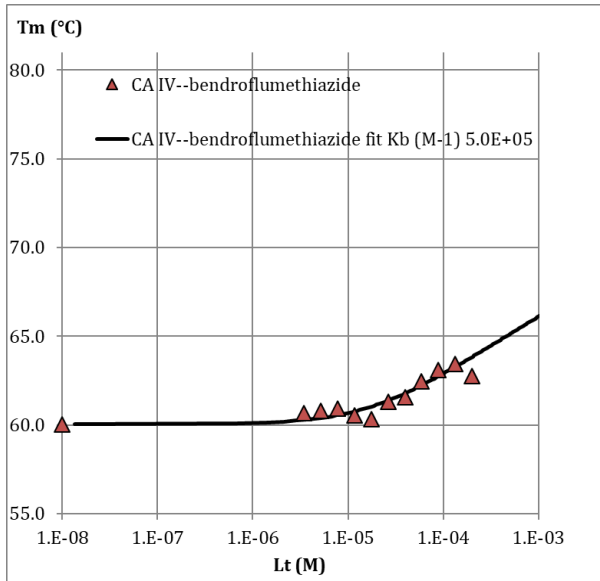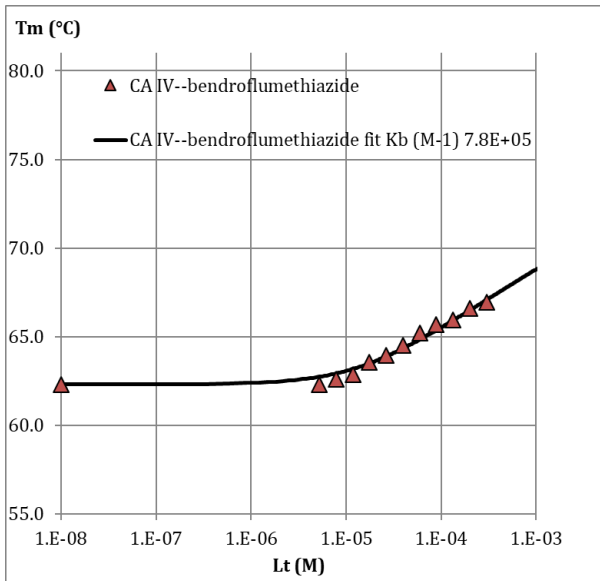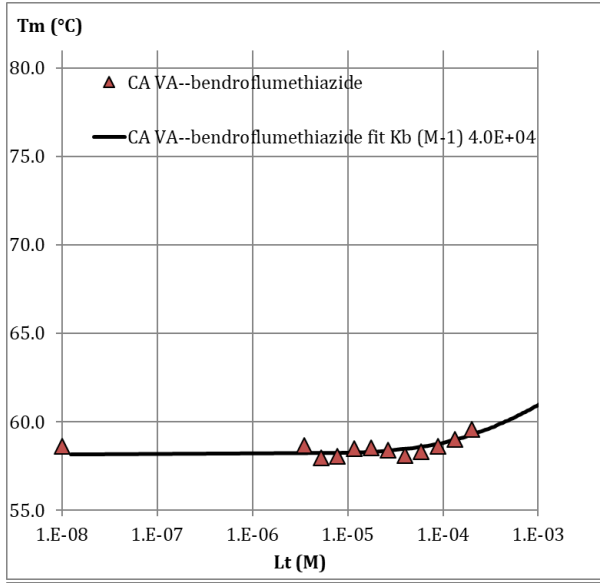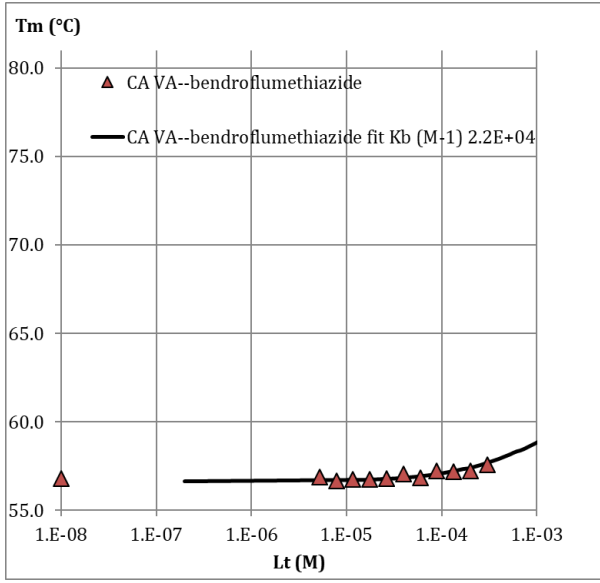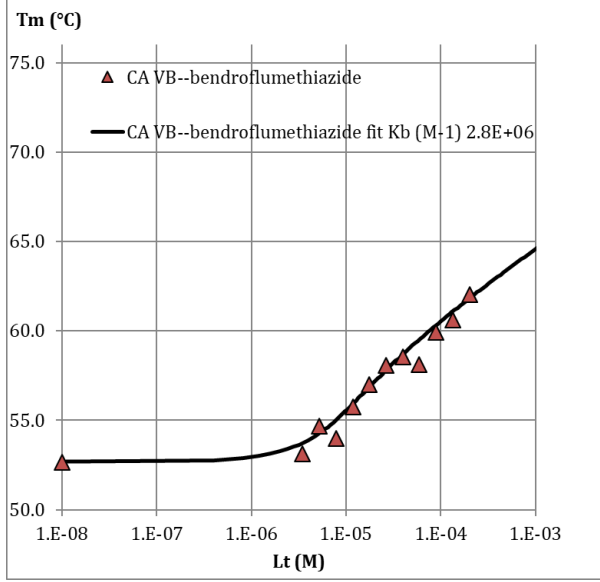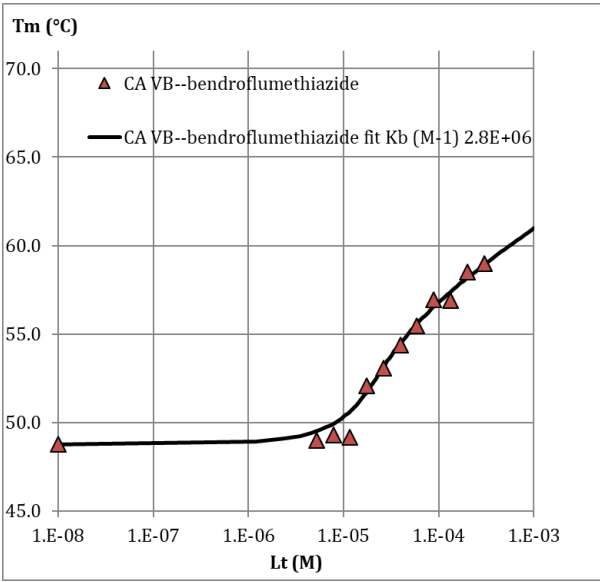

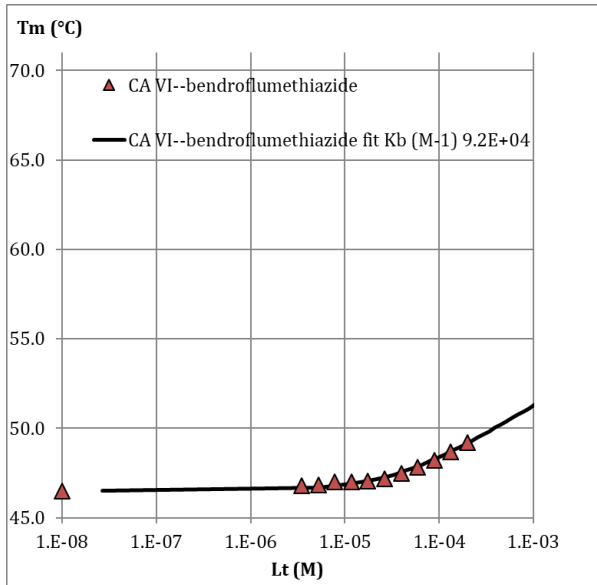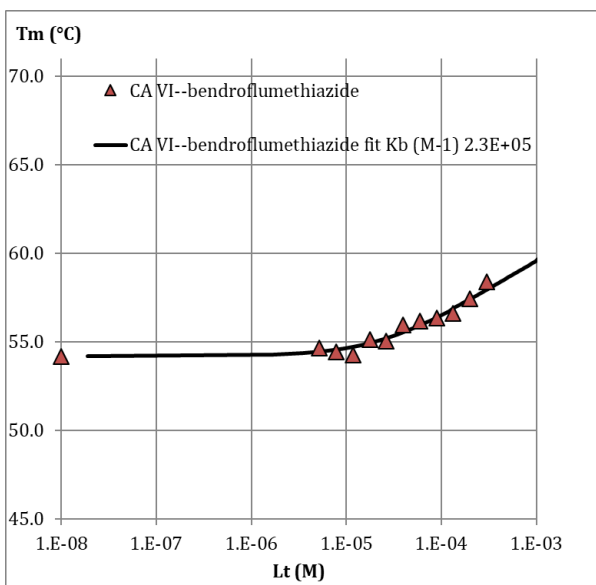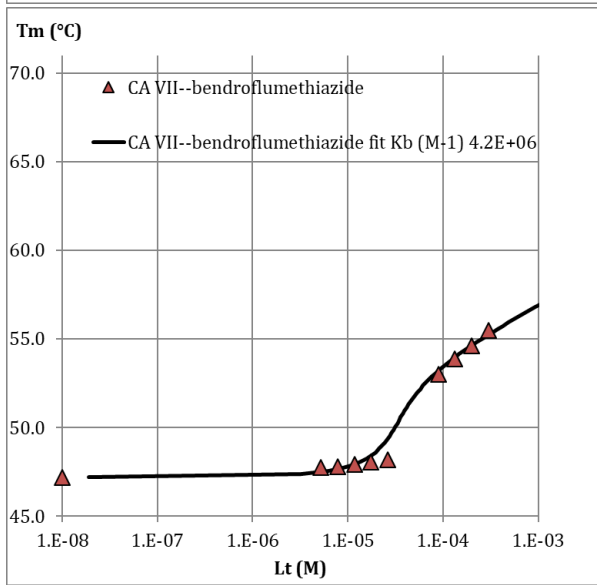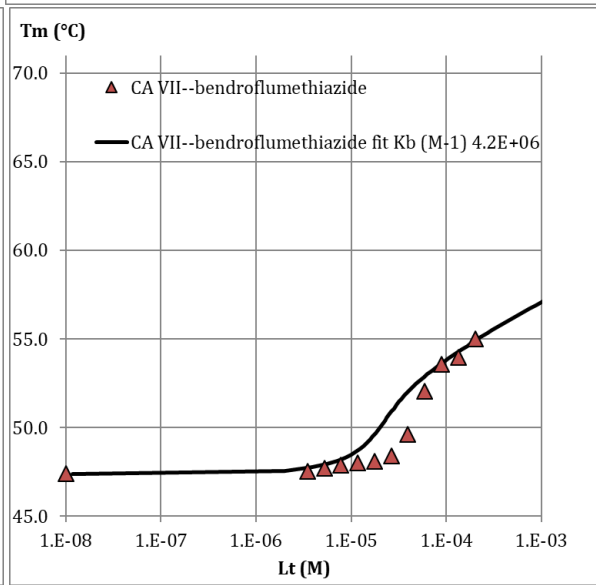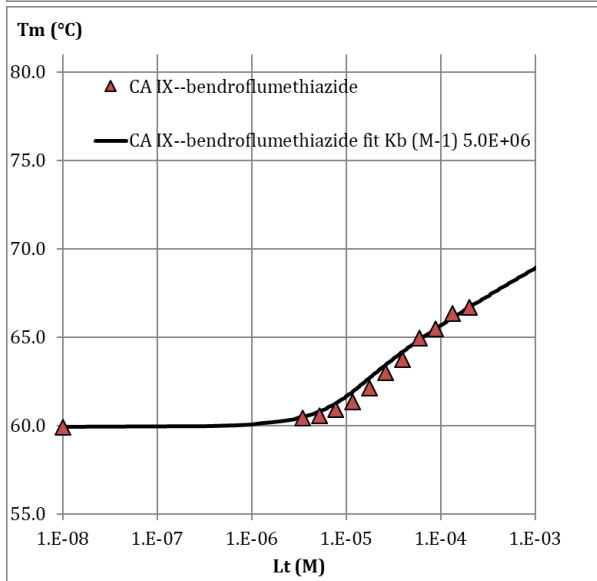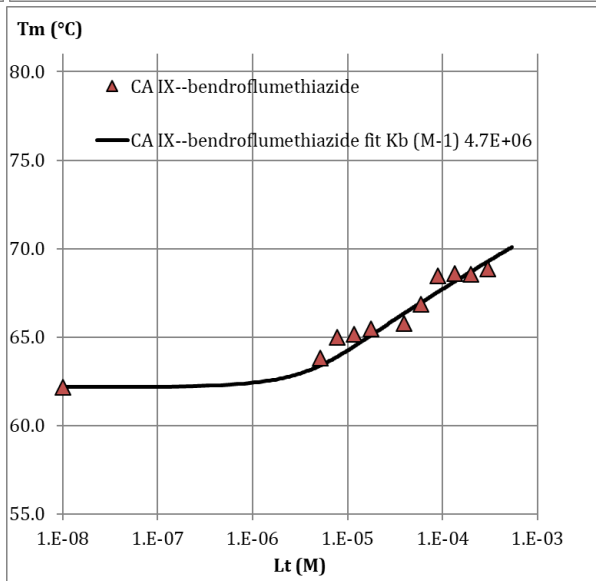



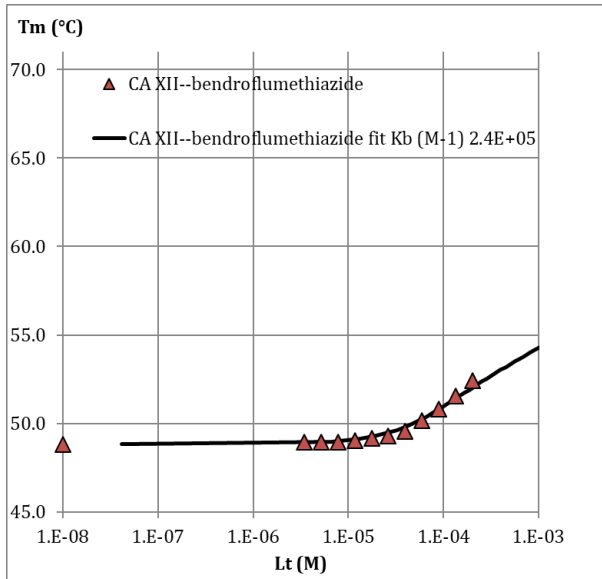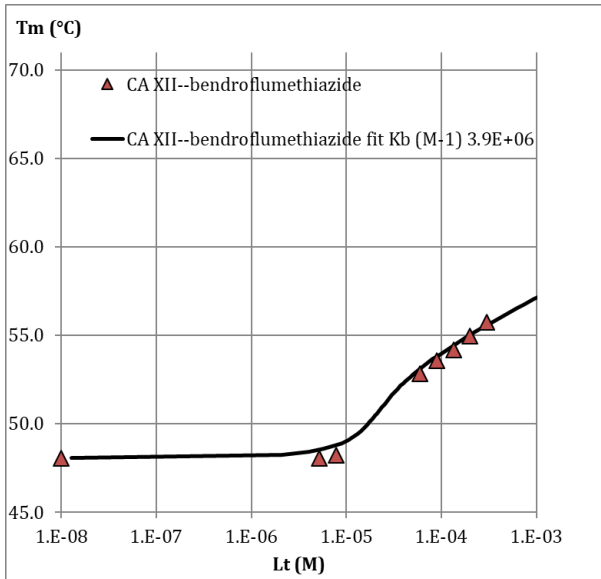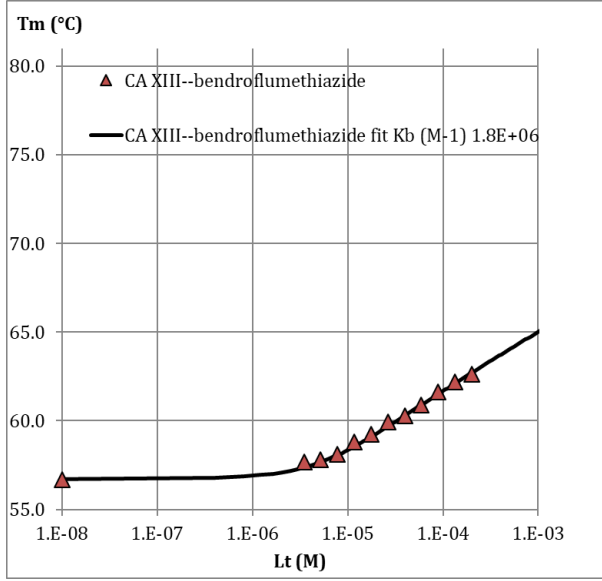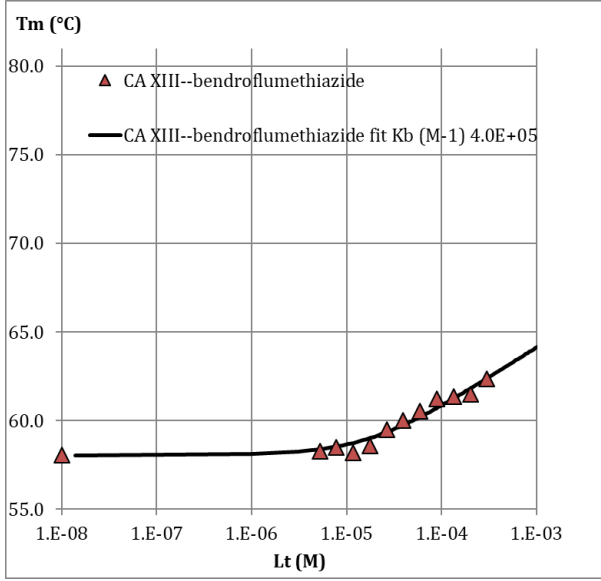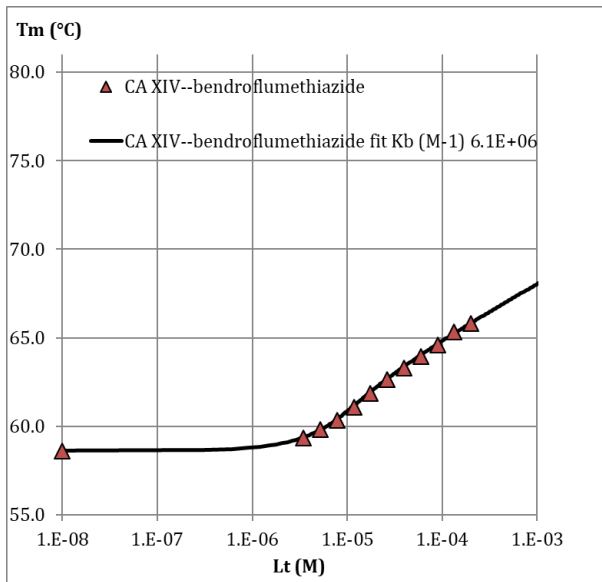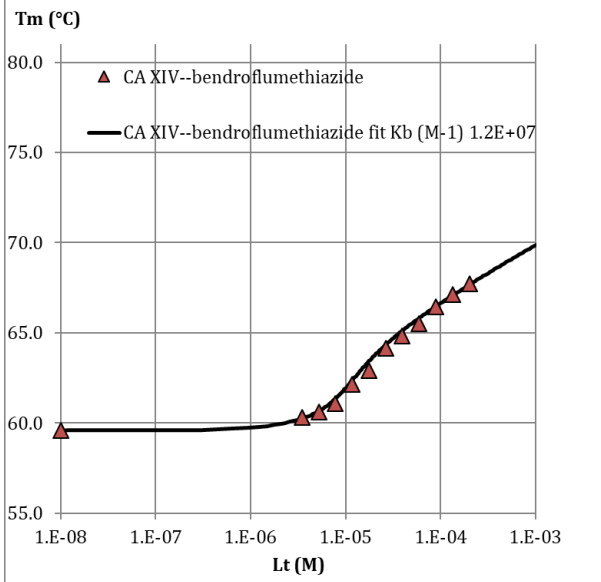

# CO<sub>2</sub> hydration activity inhibition

## CA IV - bendroflumethiazide

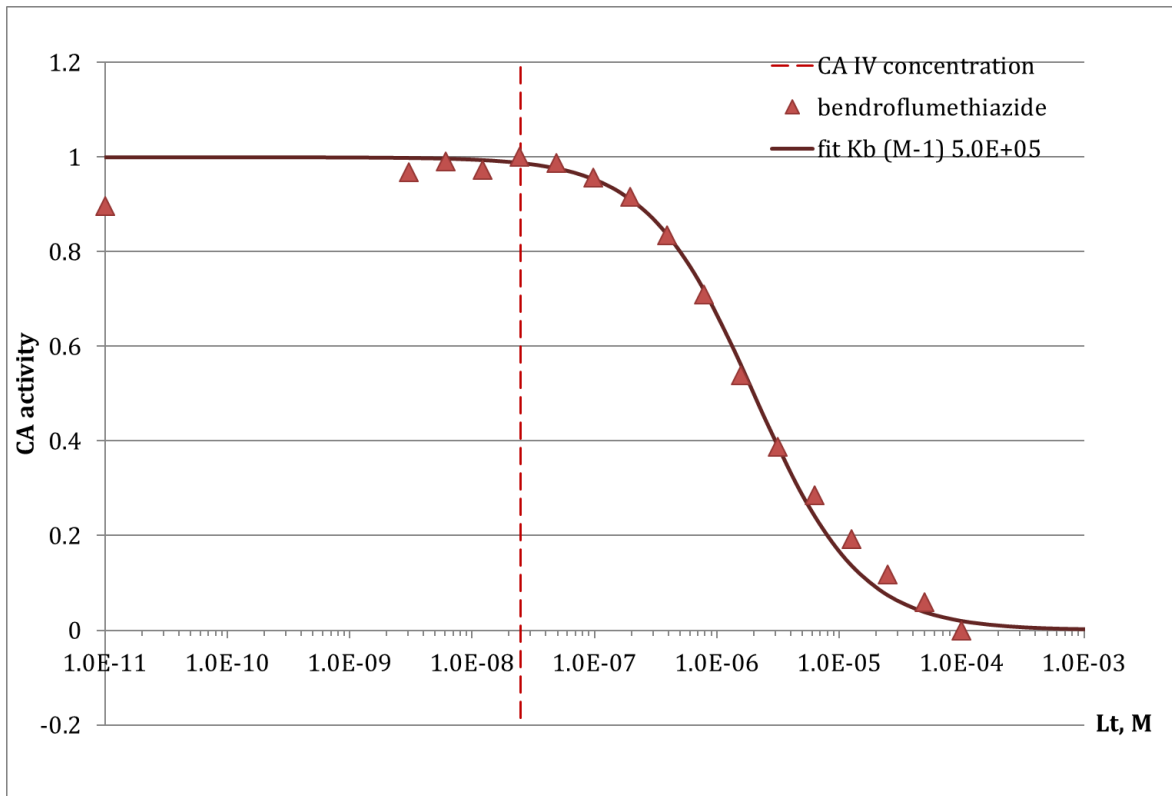

## 12. Indapamide

### Fluorescence-based thermal shift assay

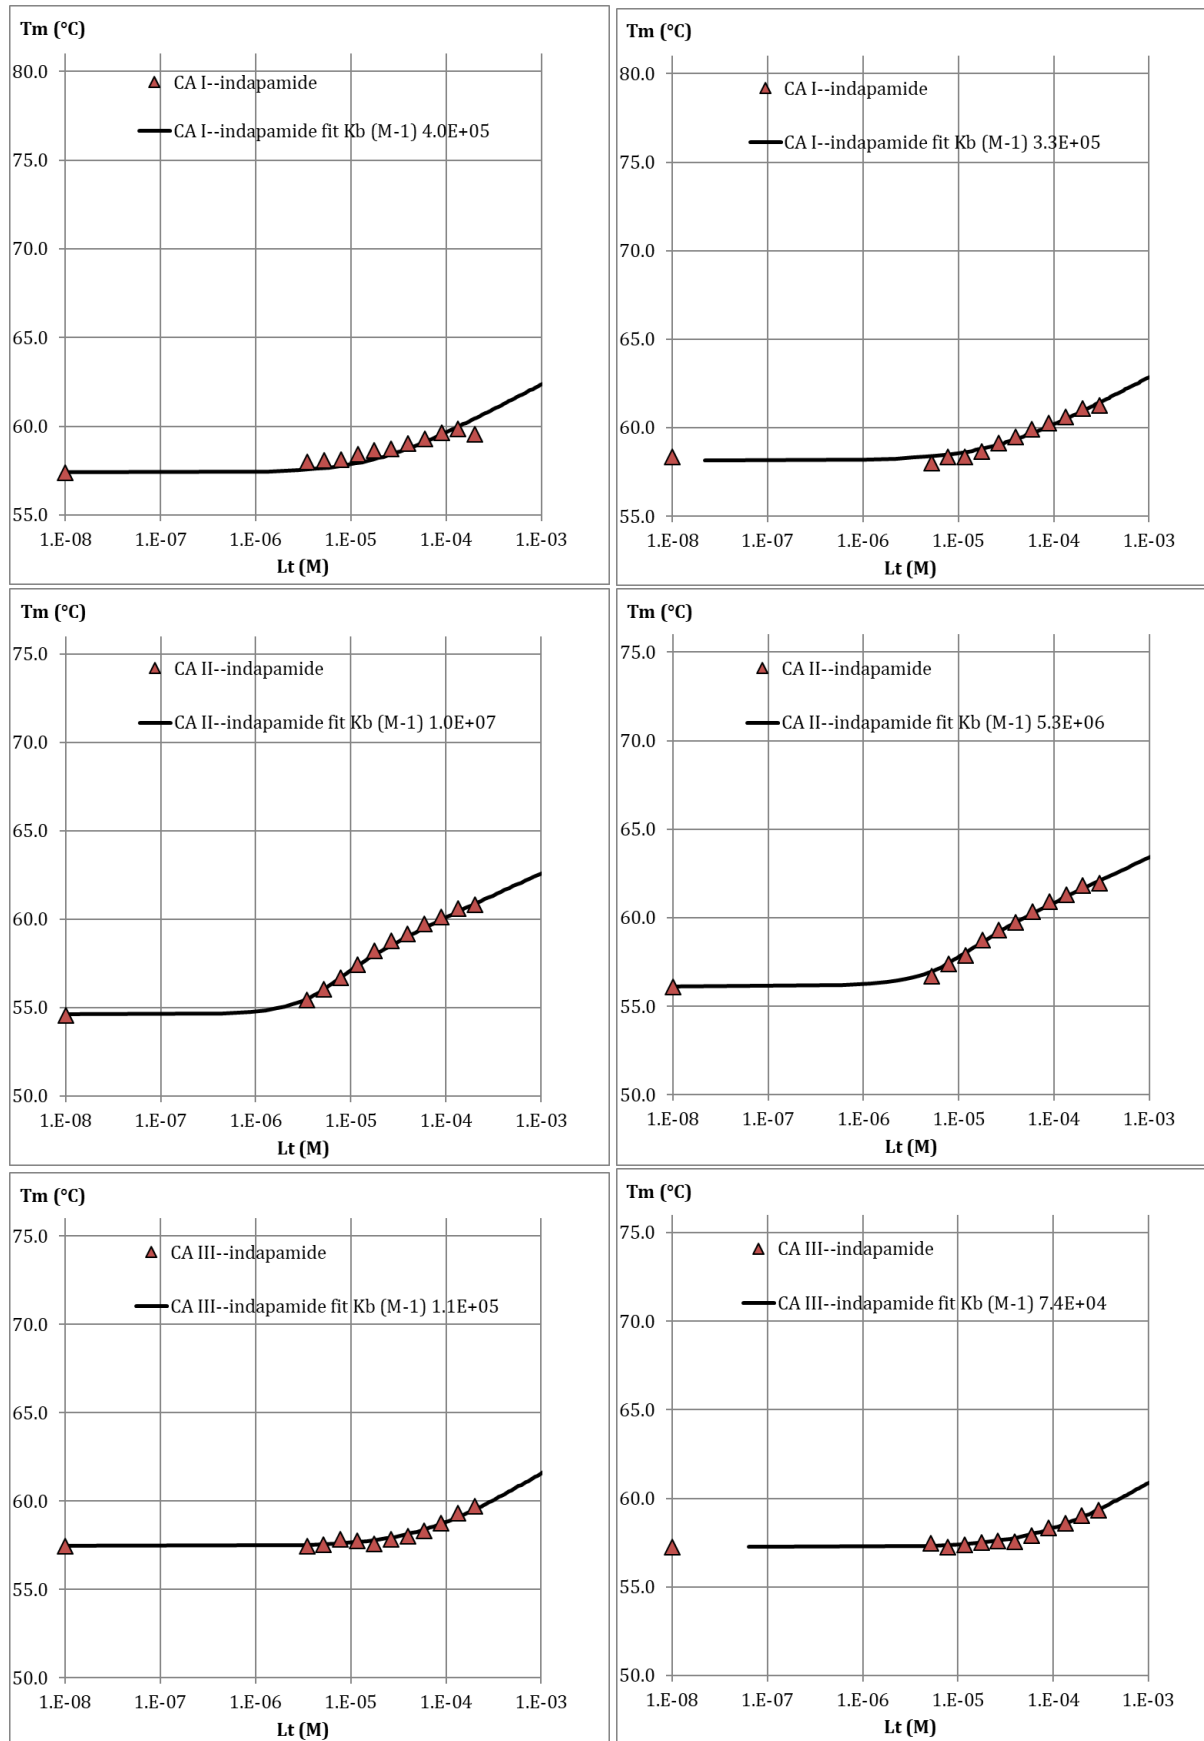

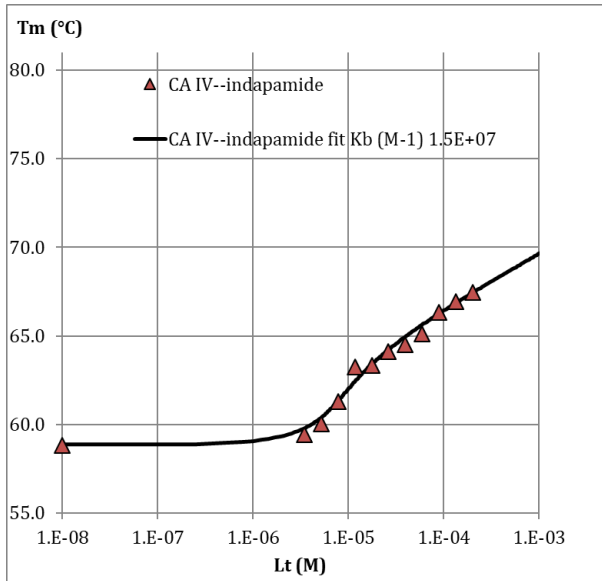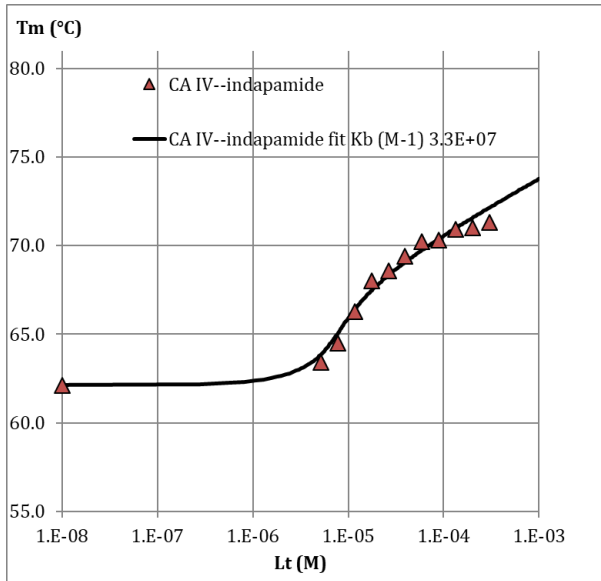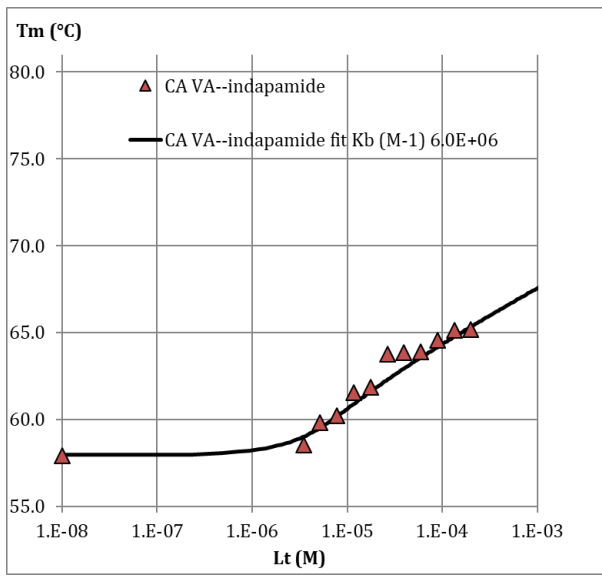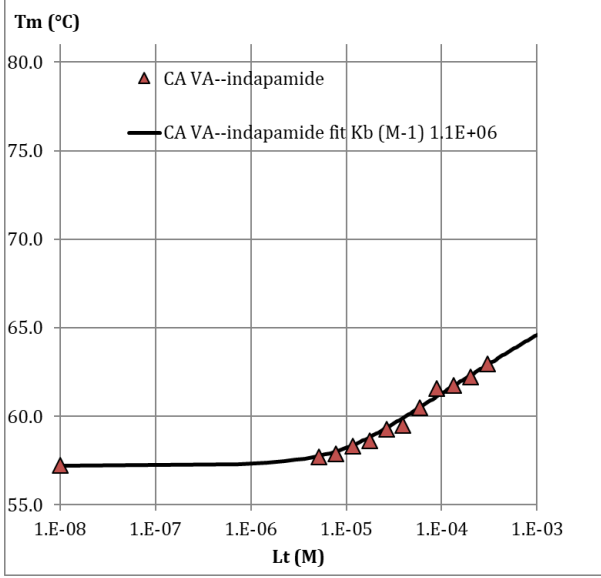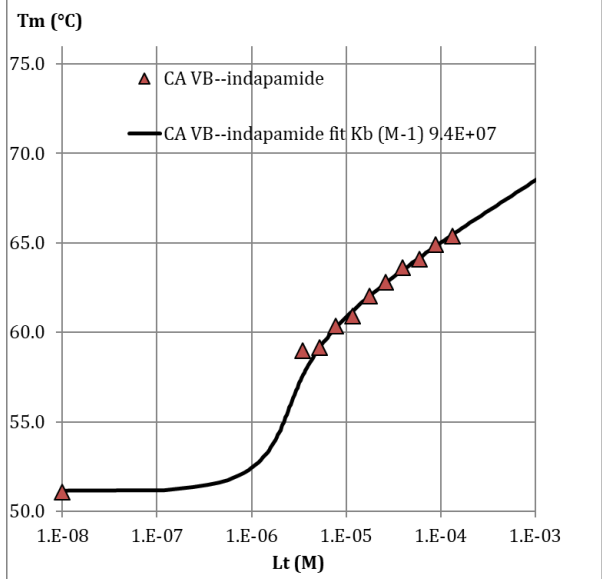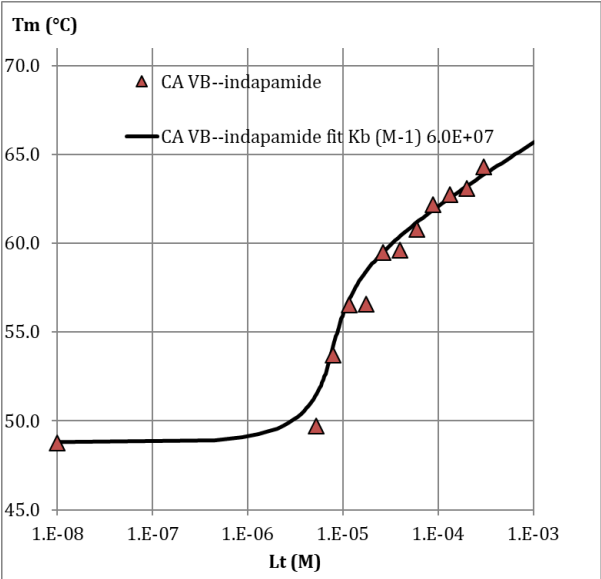

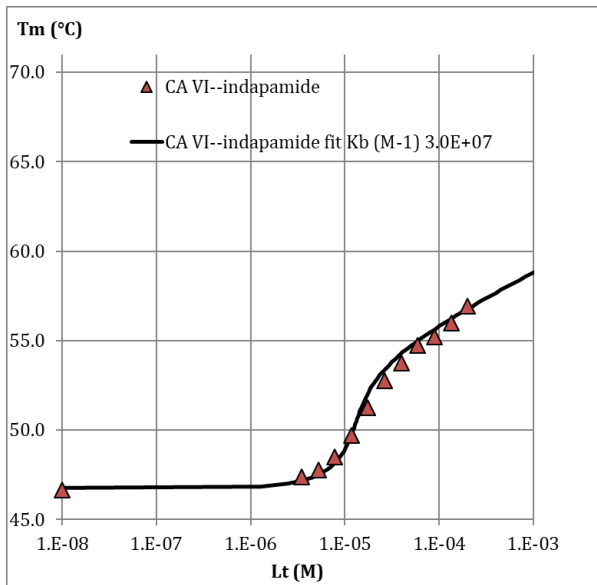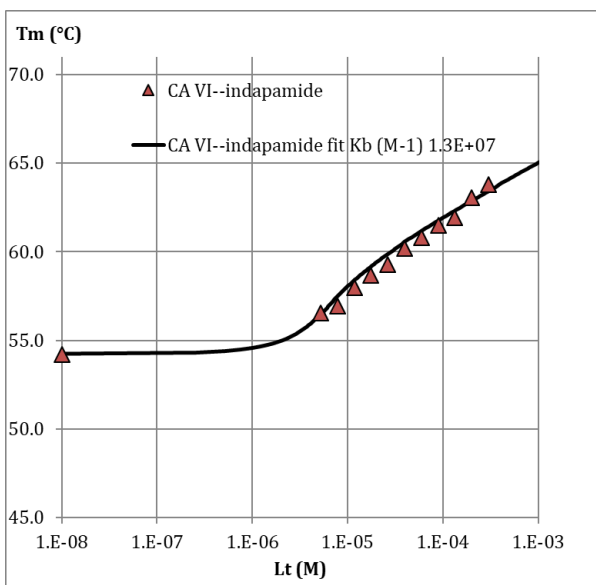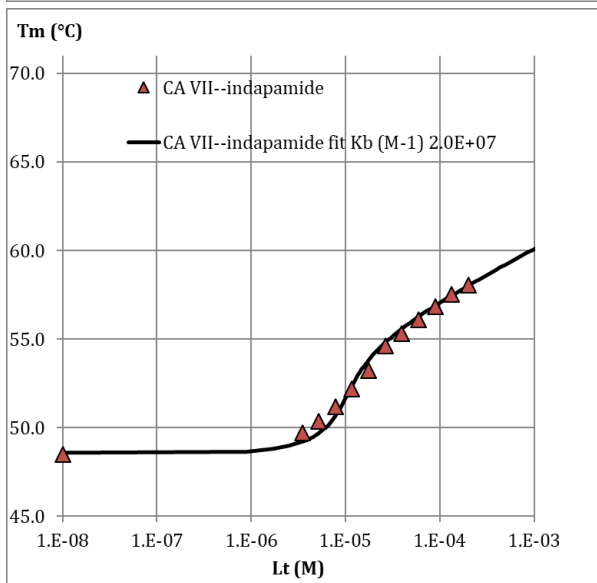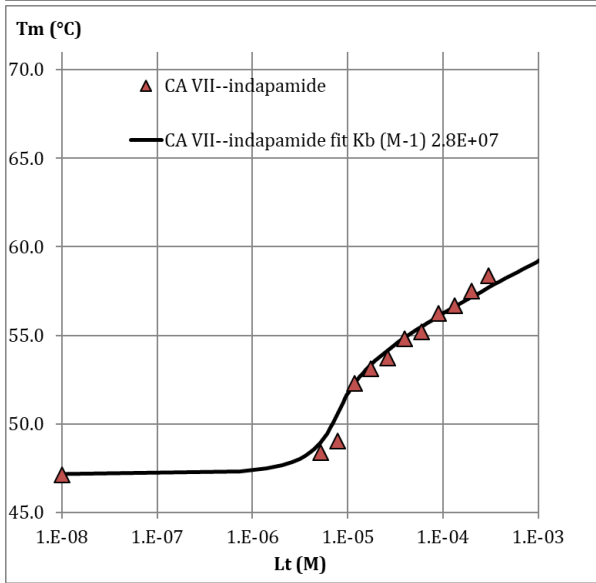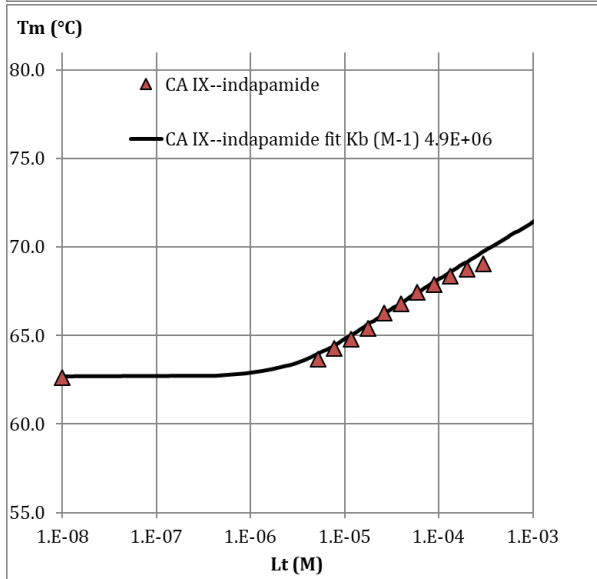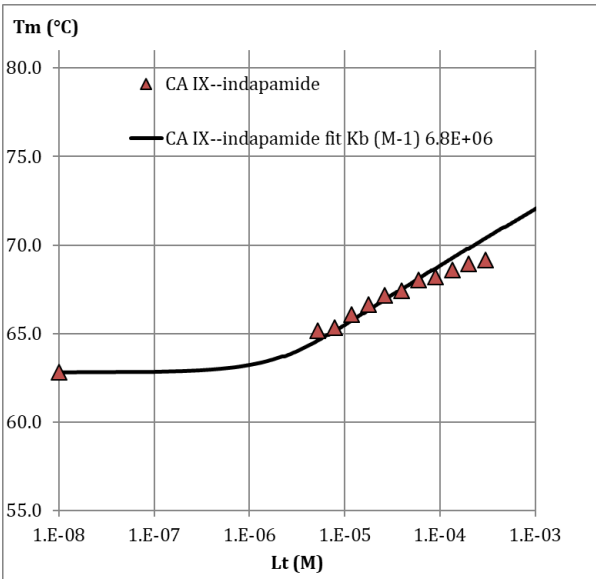

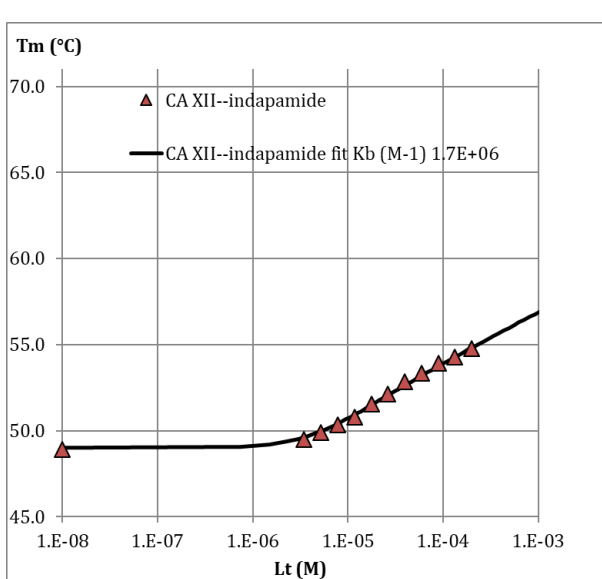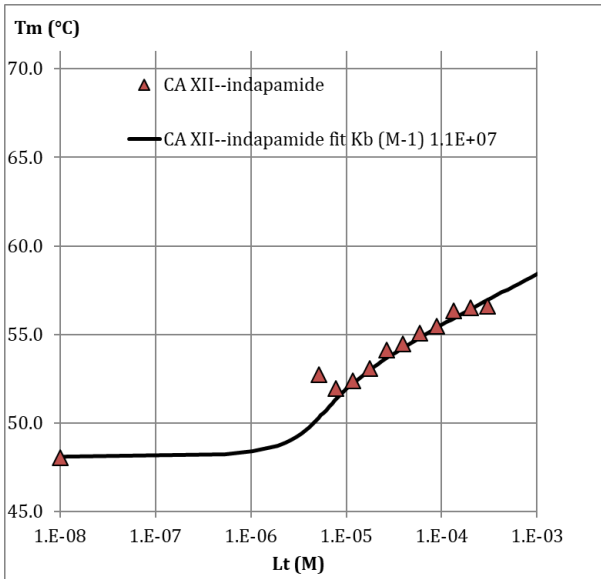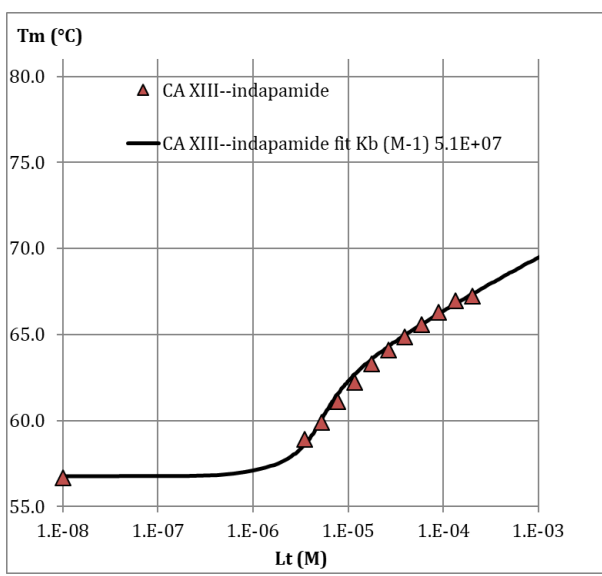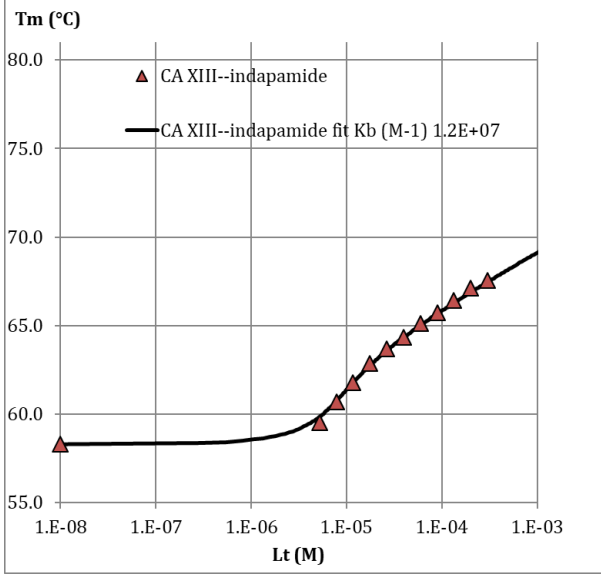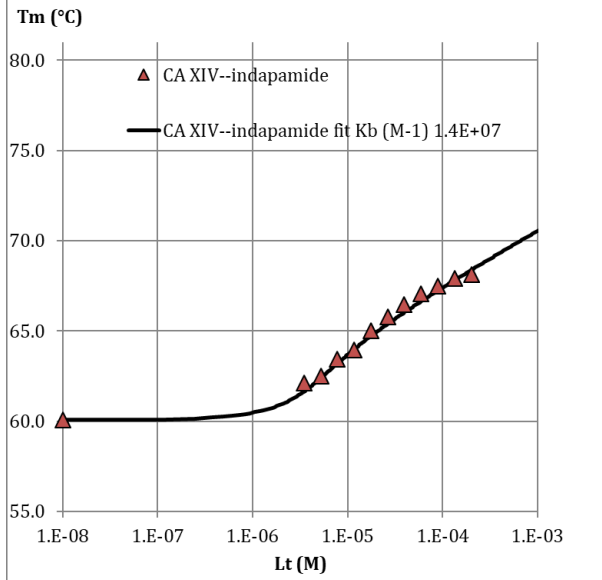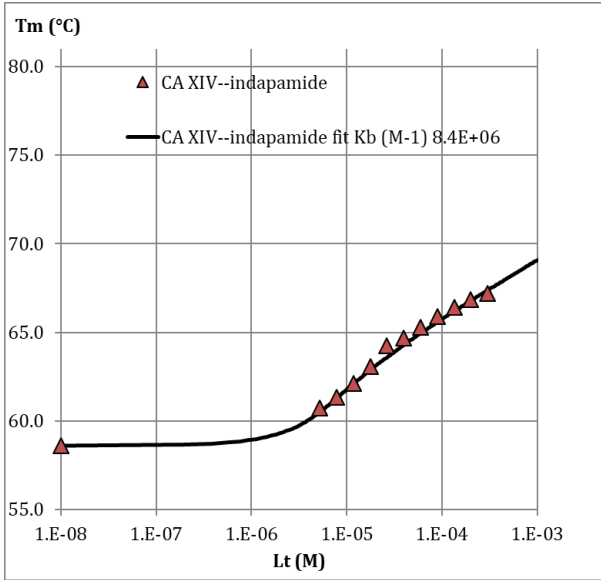

## CO<sub>2</sub> hydration activity inhibition

### CA IV - indapamide

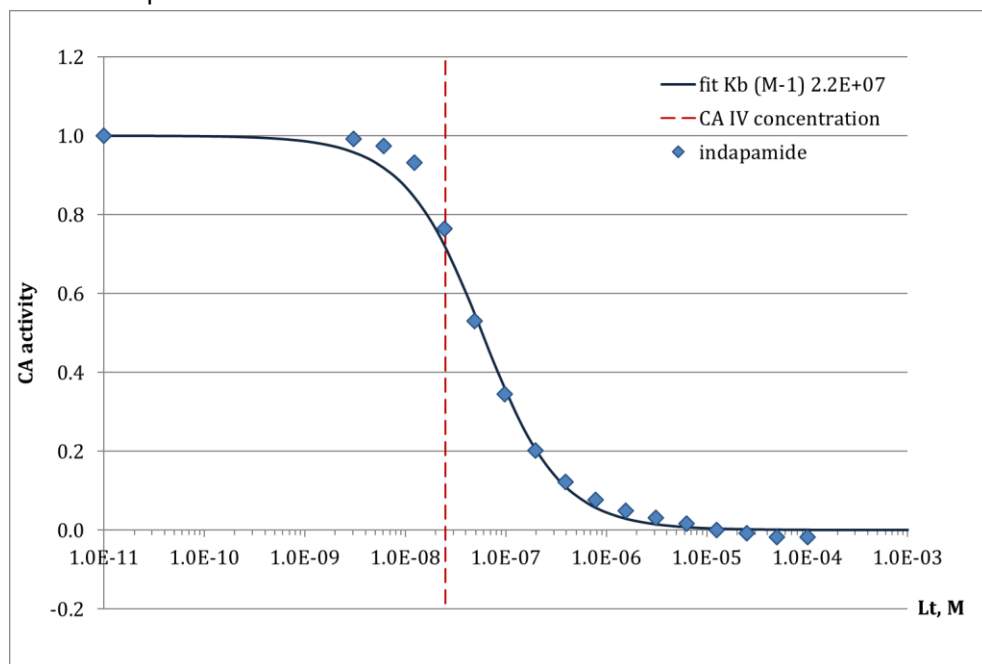

### CA XII - indapamide

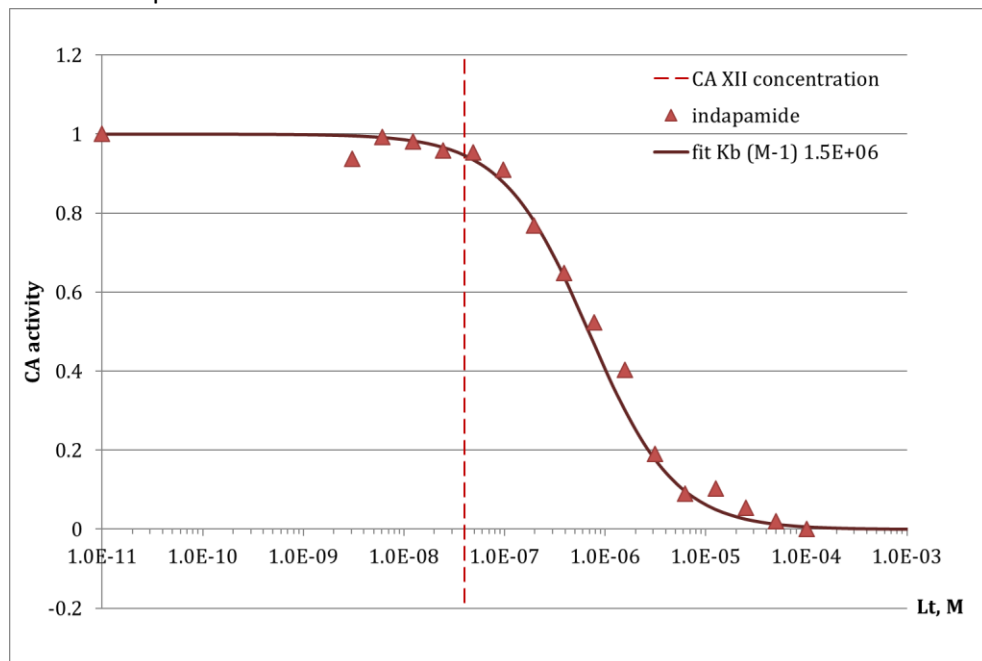

# Isothermal titration calorimetry

## CA II – indapamide

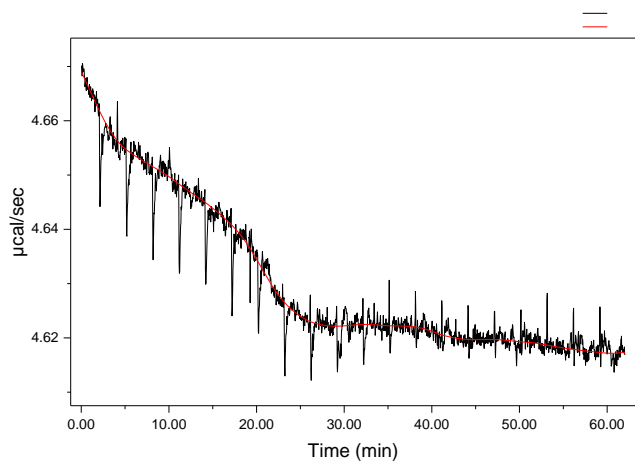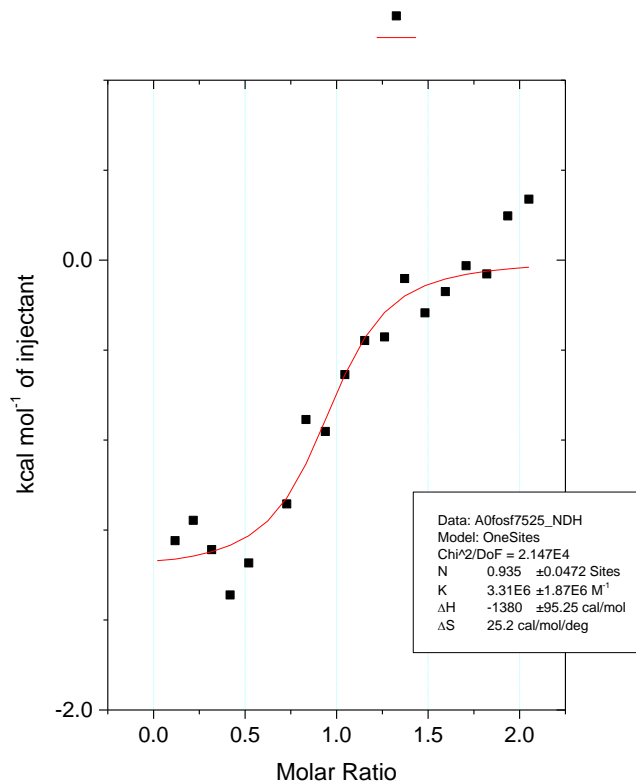

## CA II – indapamide

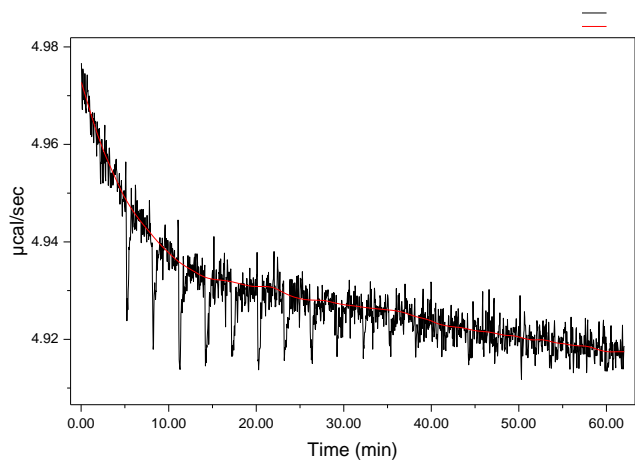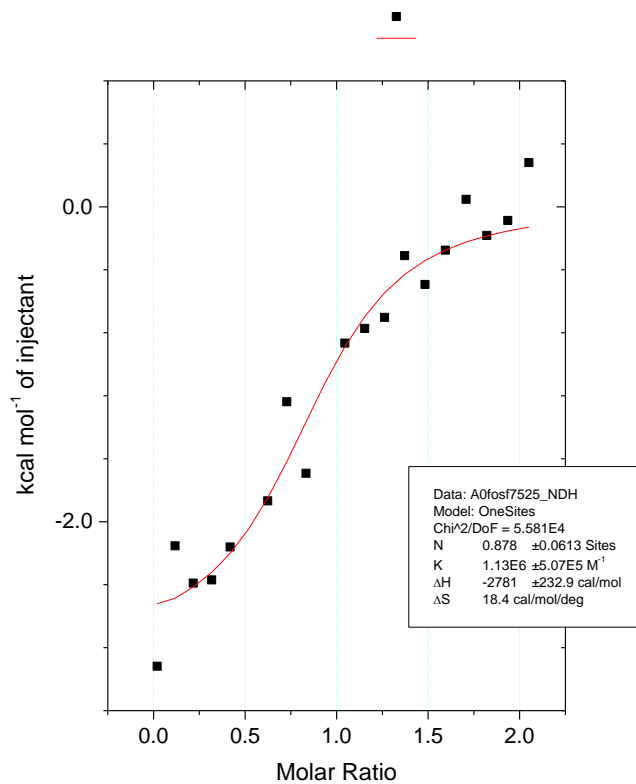



# 13. Clopamide

## Fluorence-based thermal shift assay

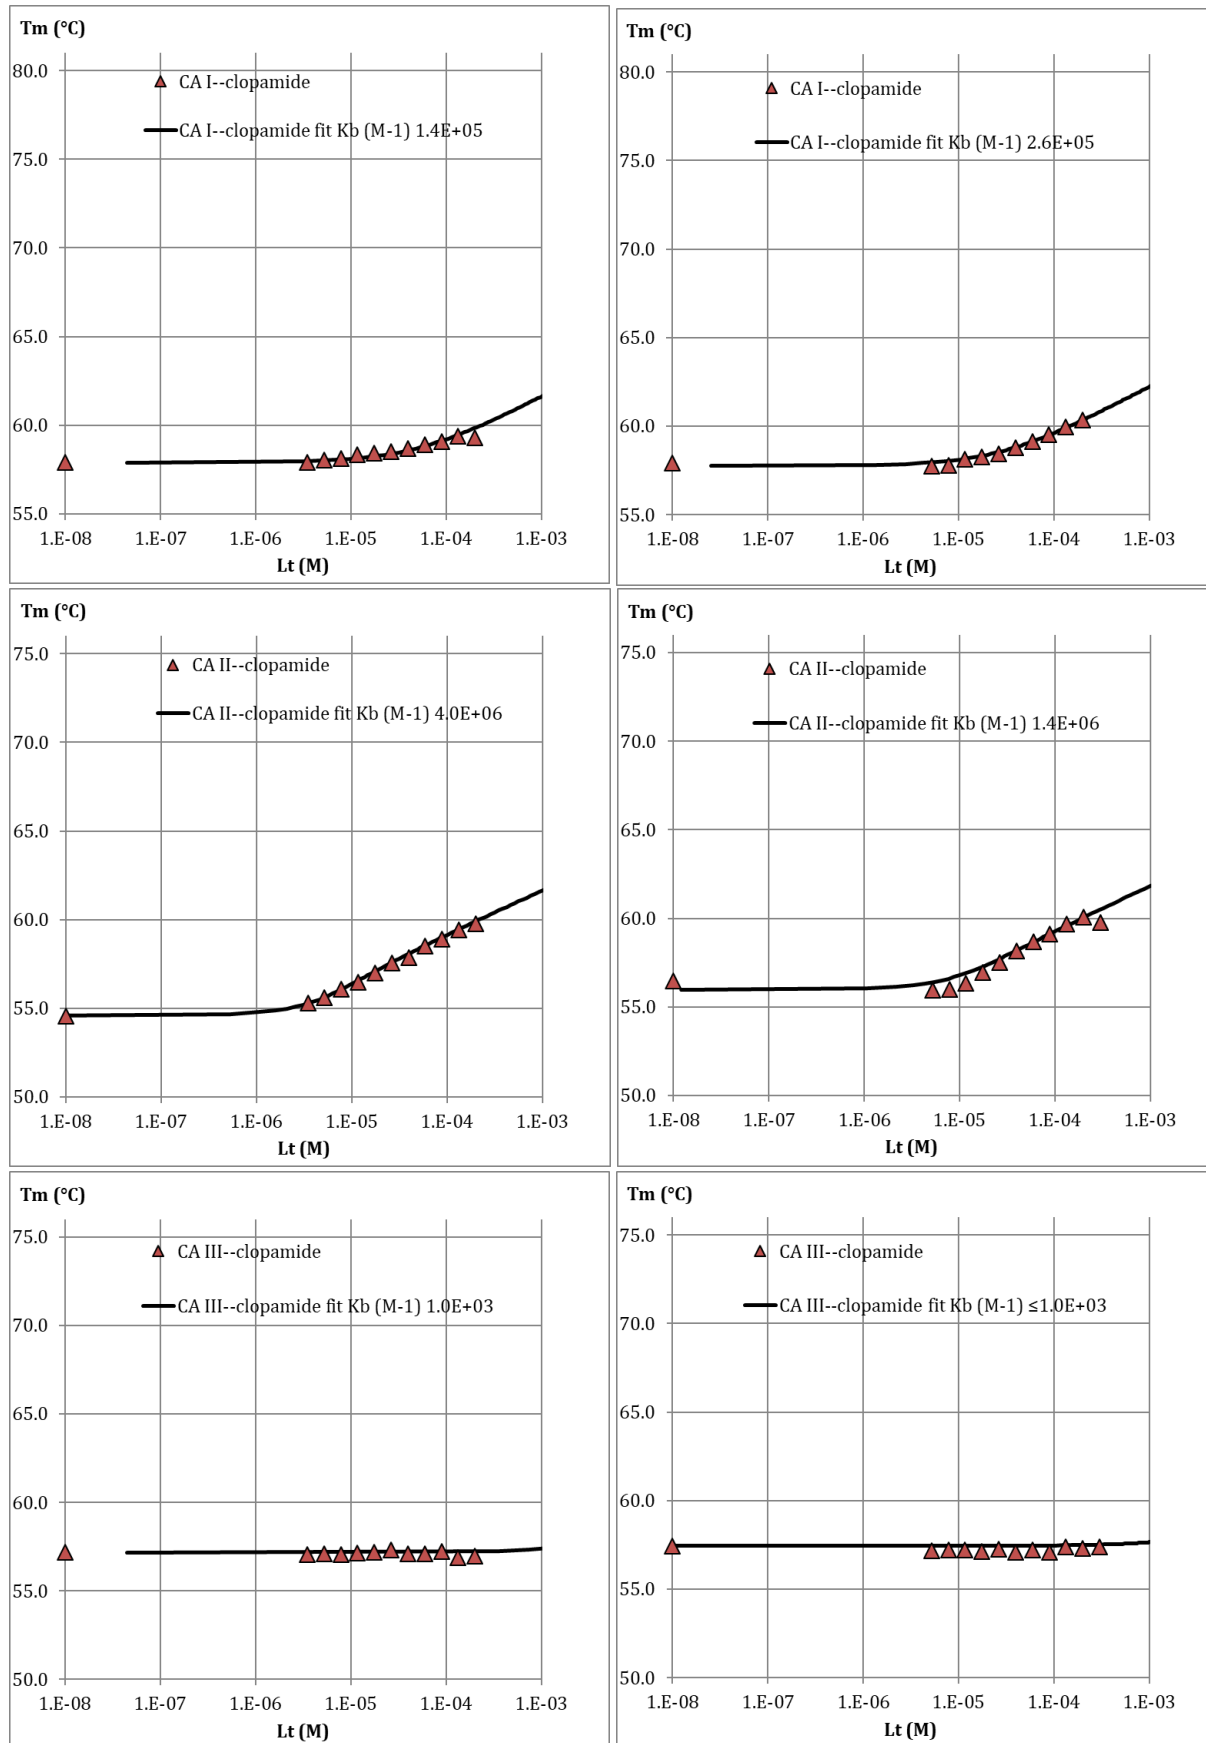

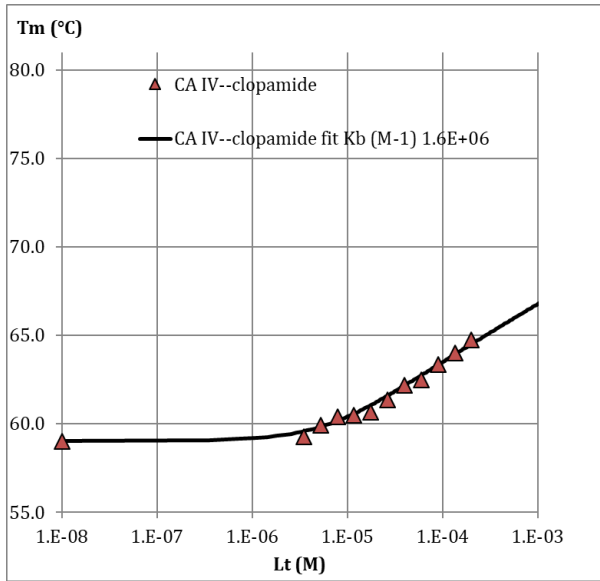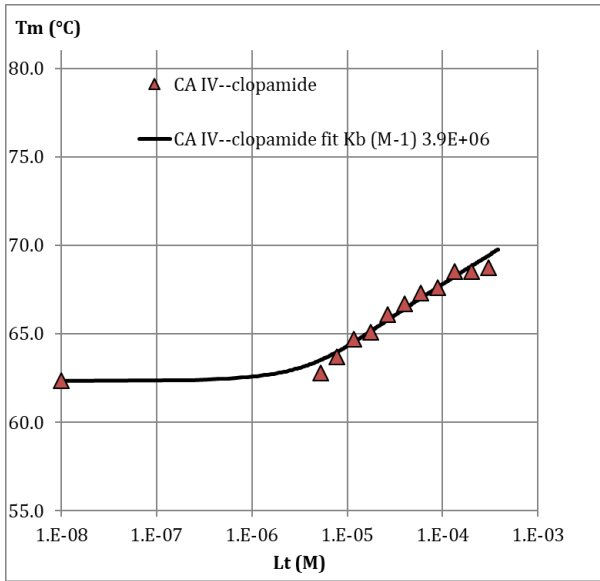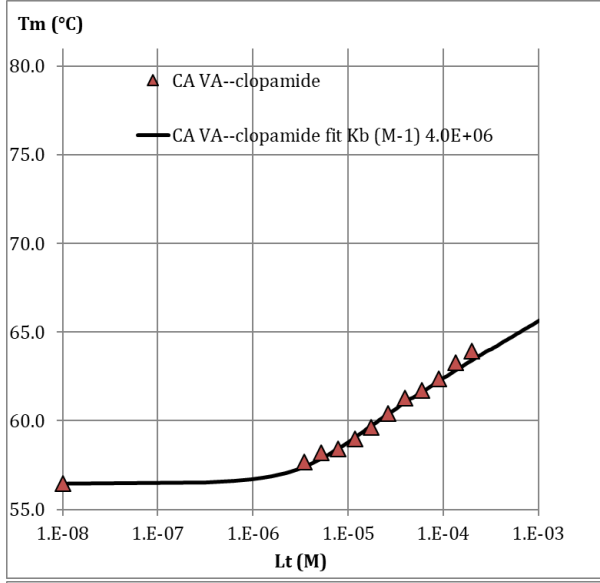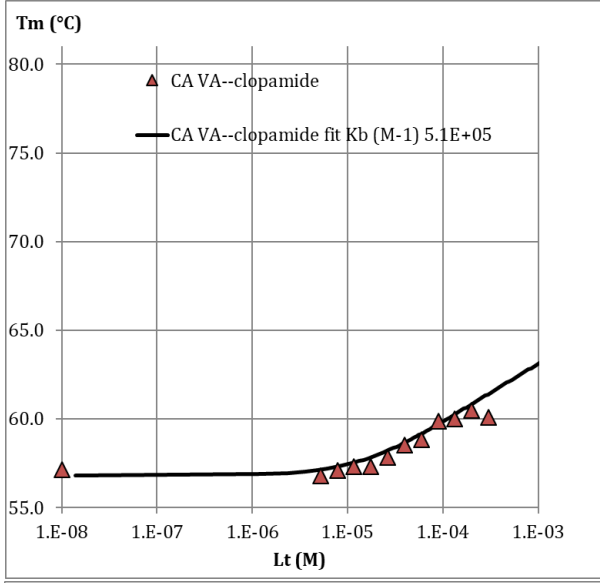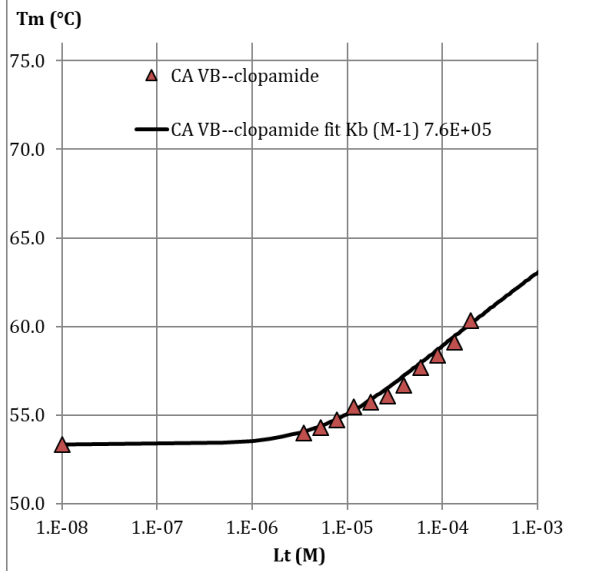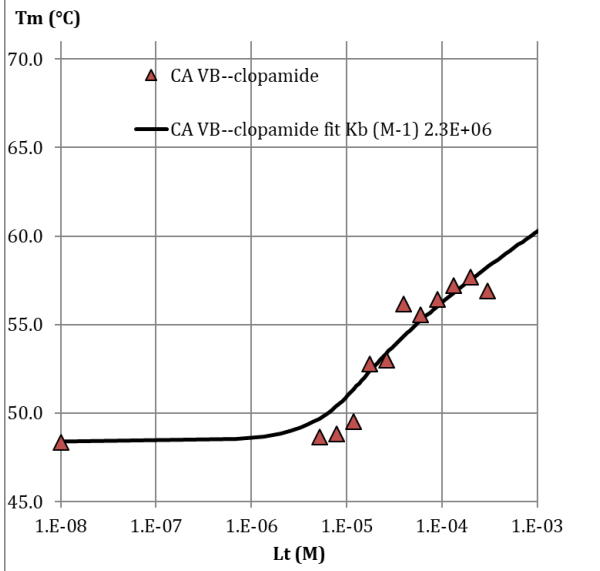

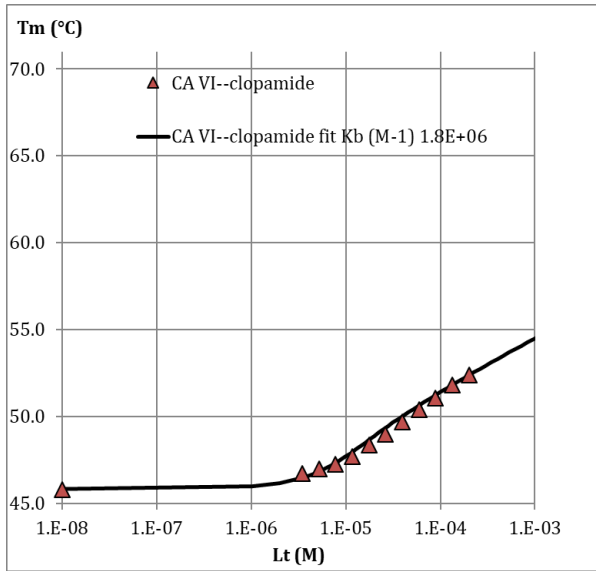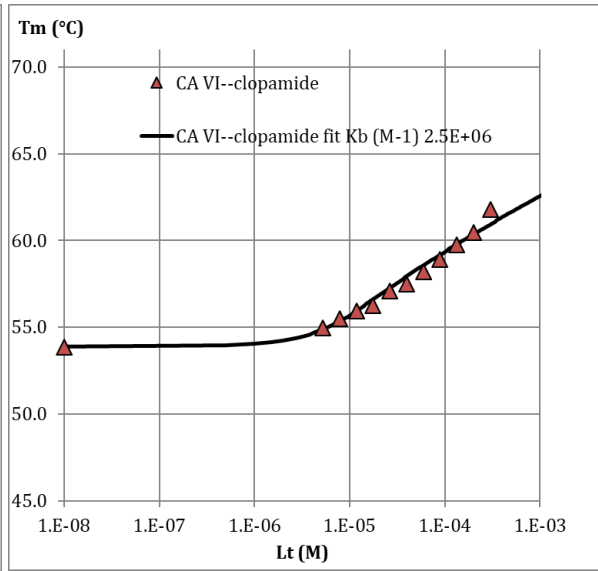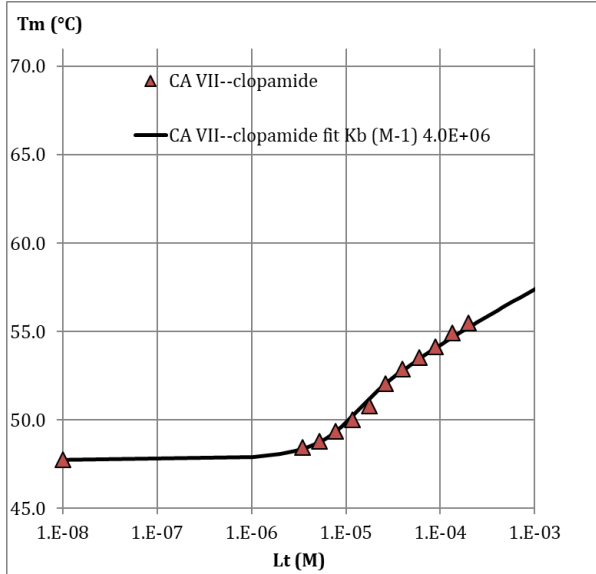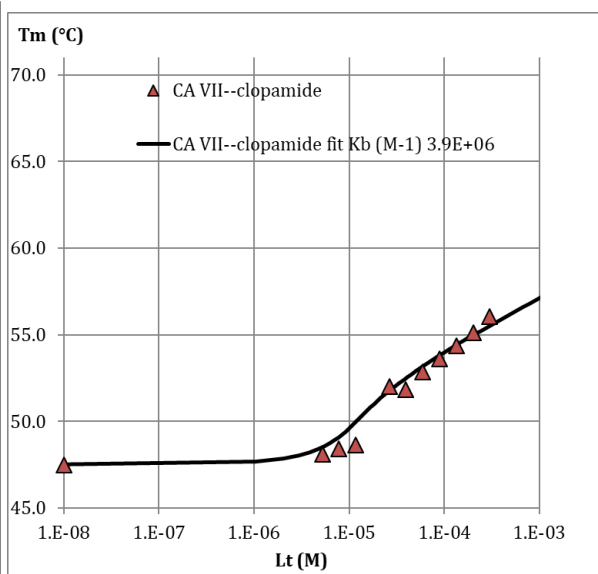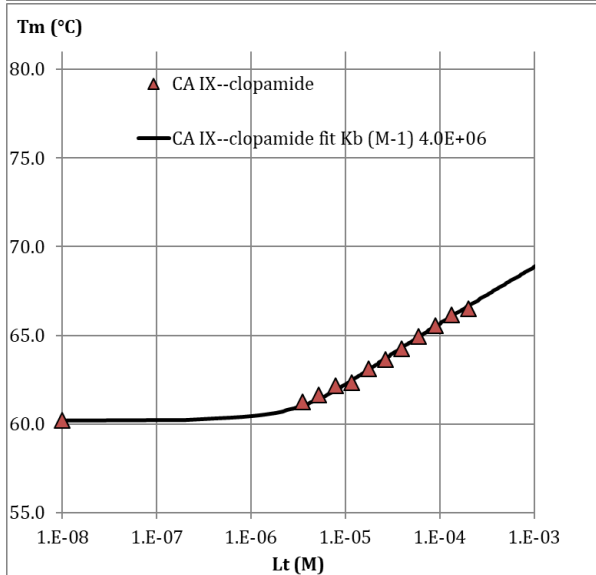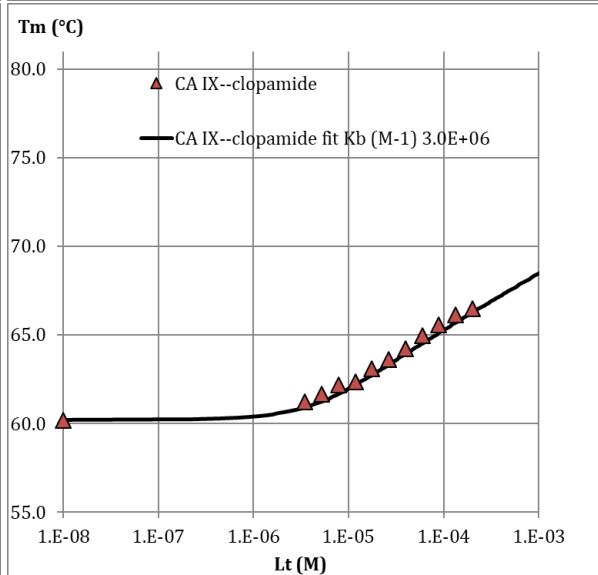

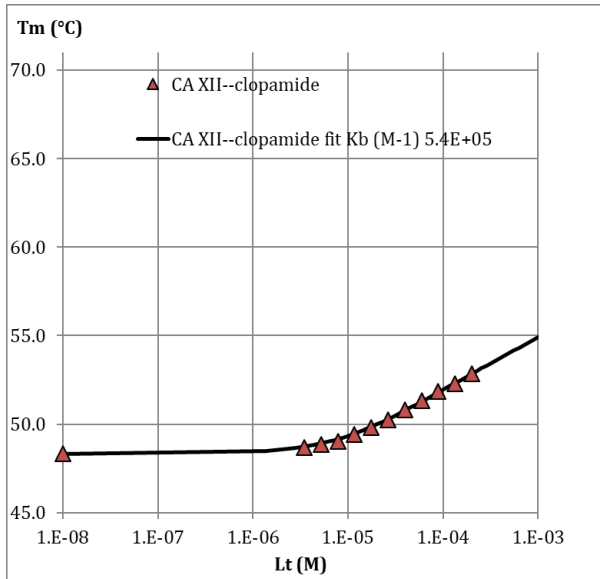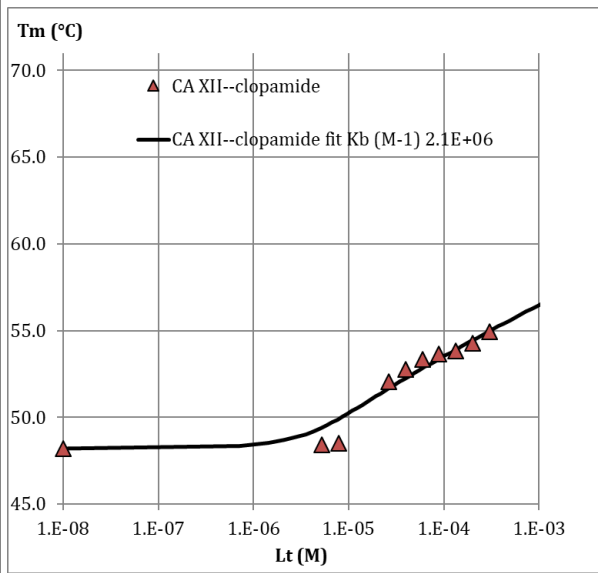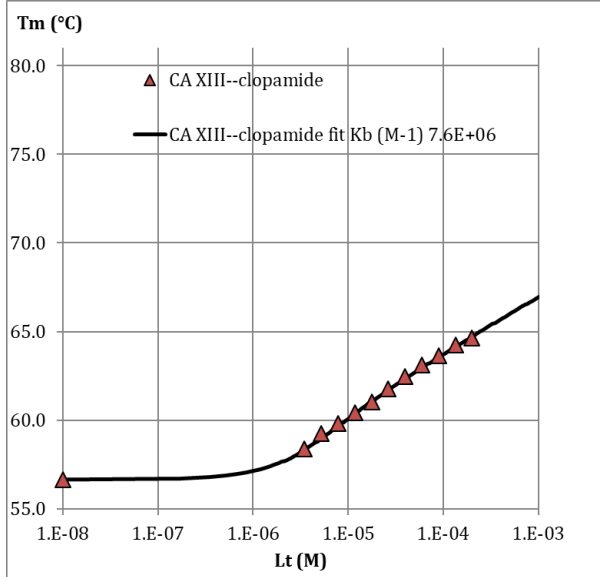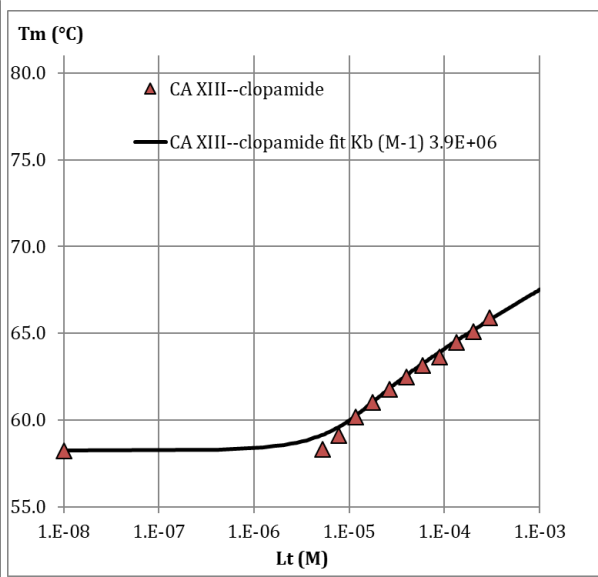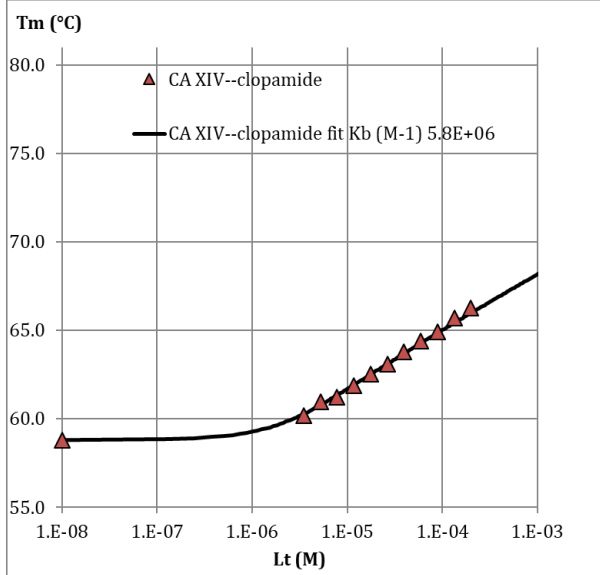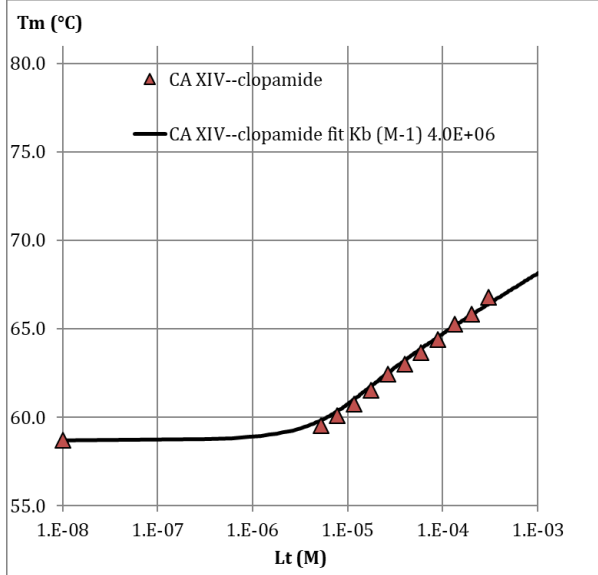

# Isothermal titration calorimetry

## CA II – clopamide

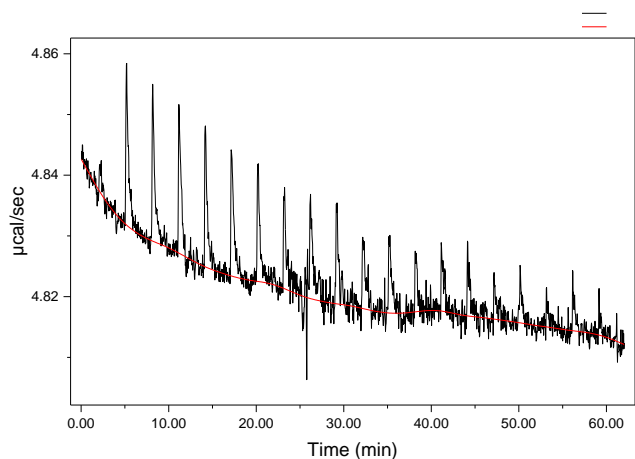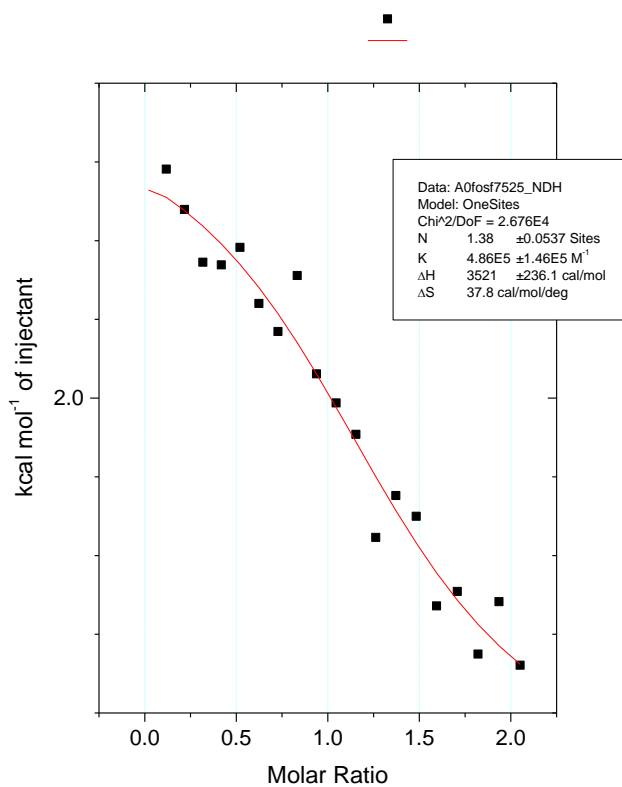

## CA II – clopamide

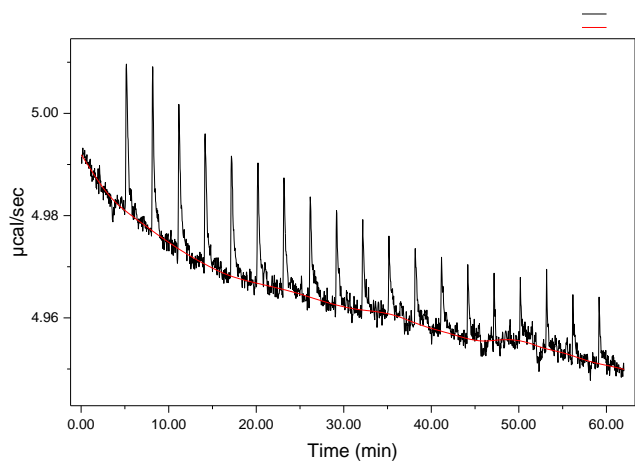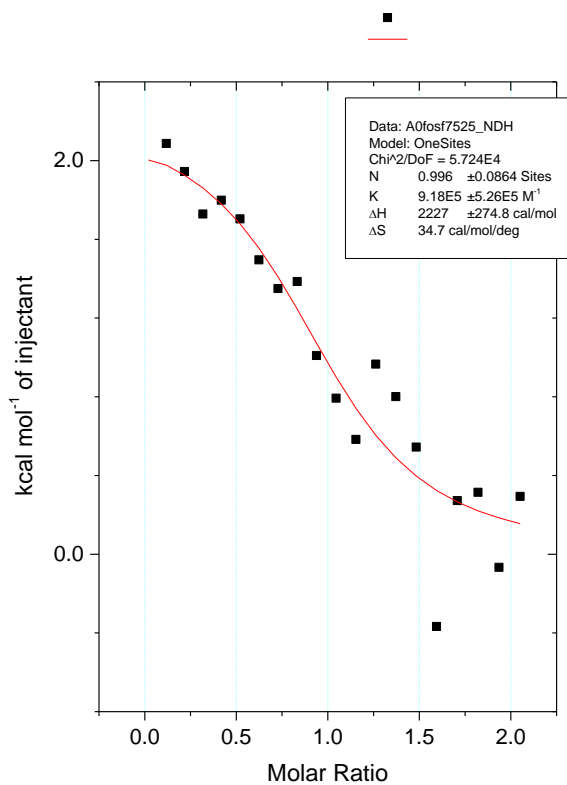

# 14. Xipamide

## Fluorence-based thermal shift assay

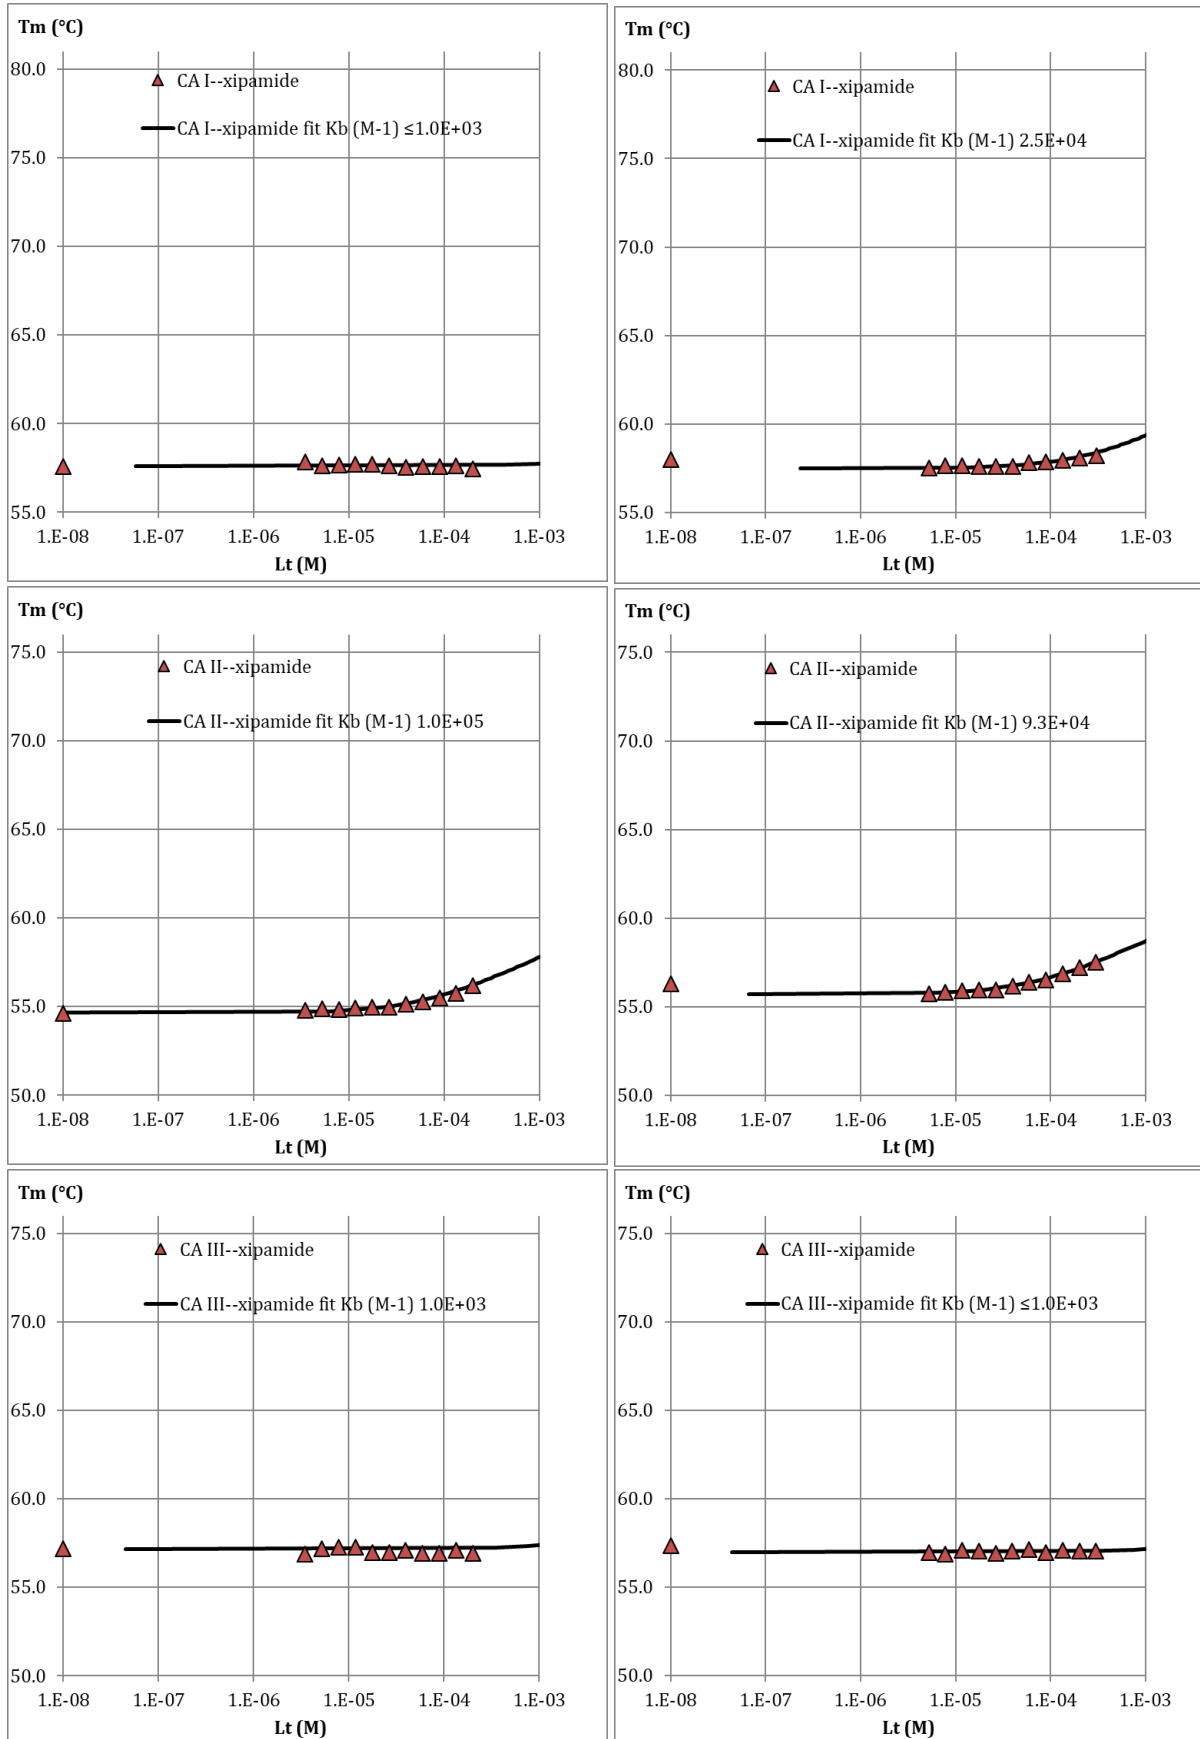

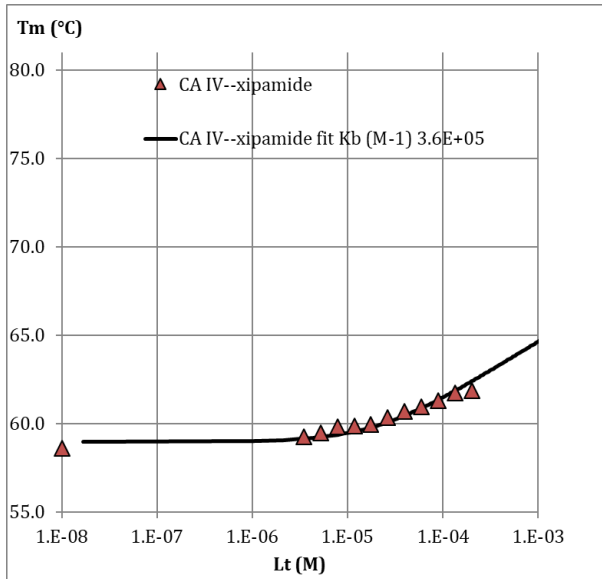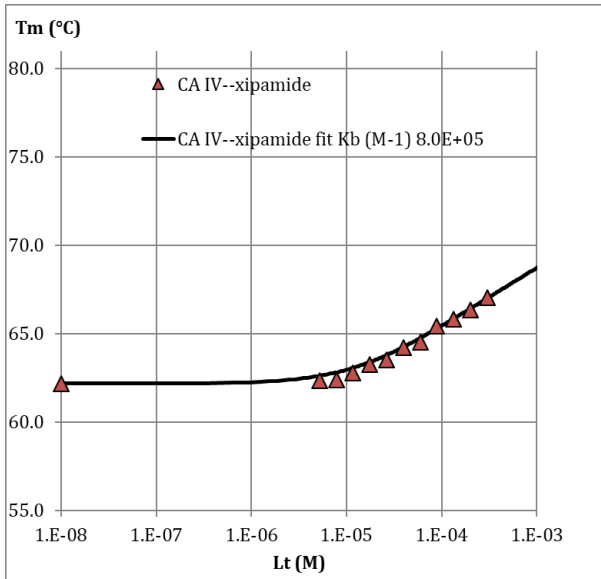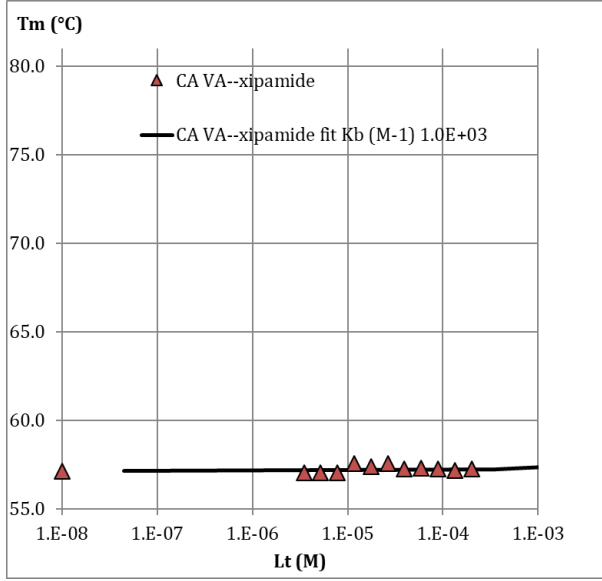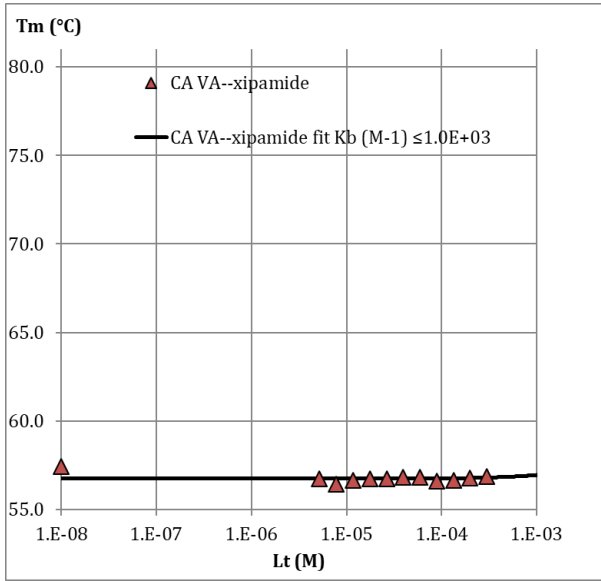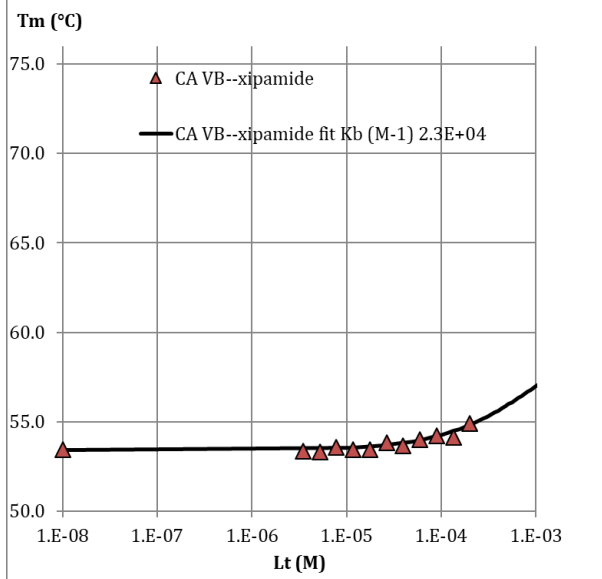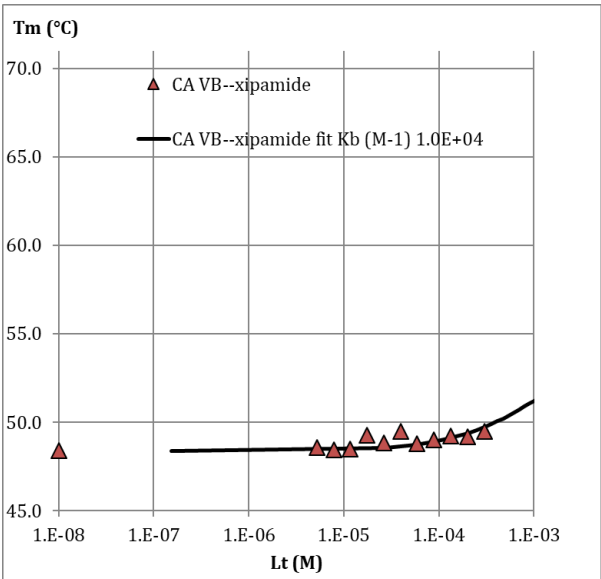

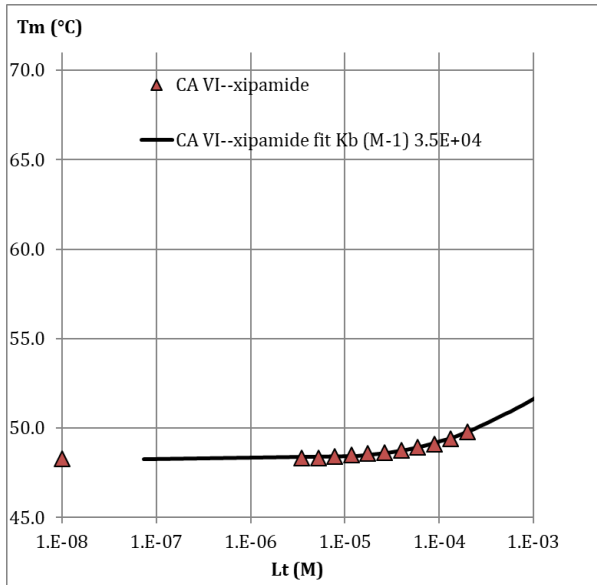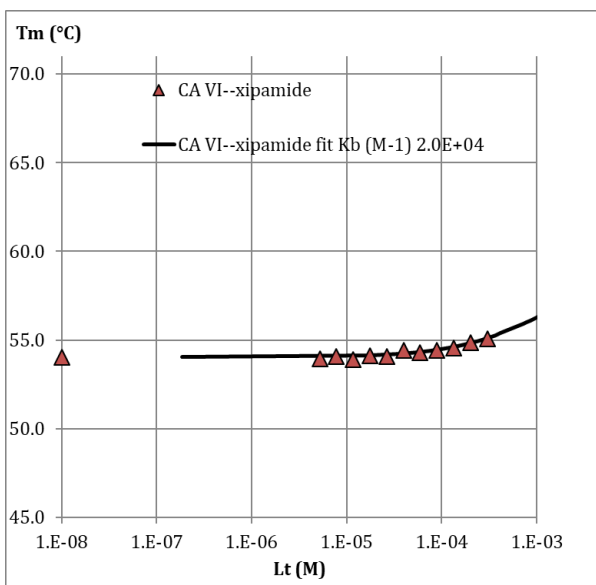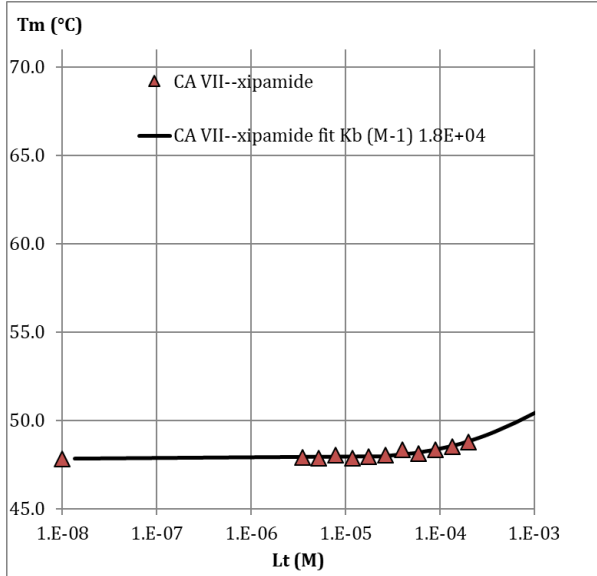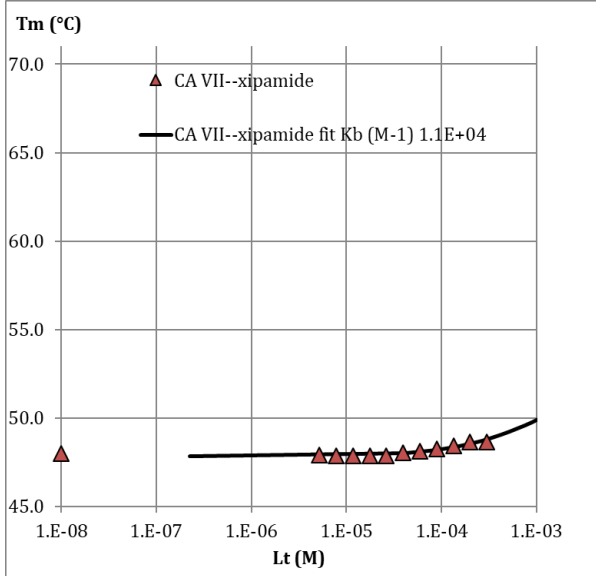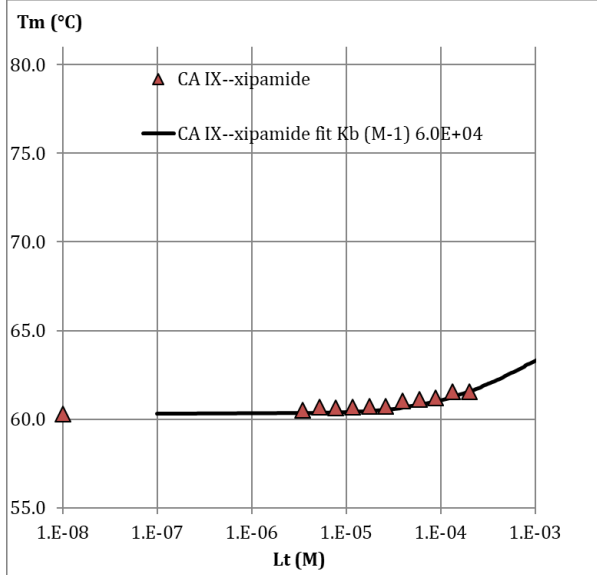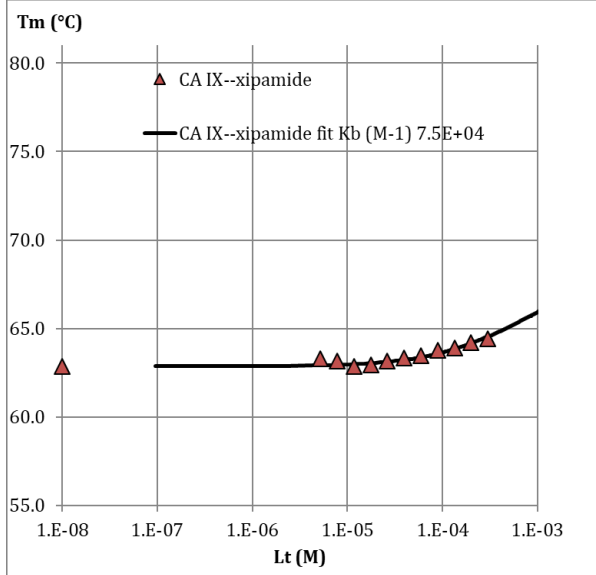



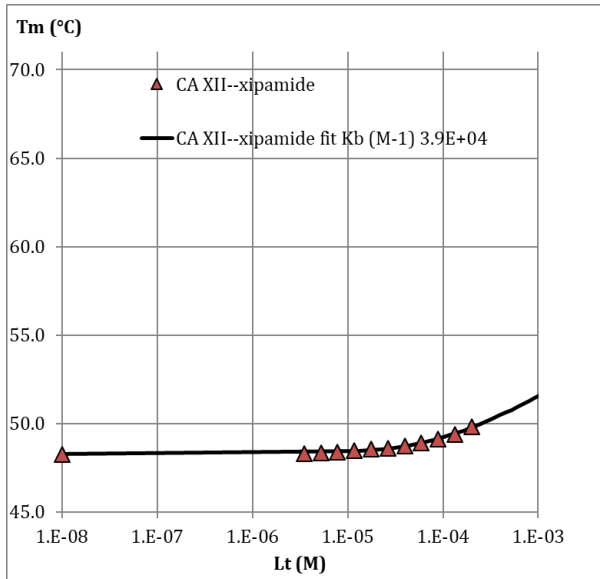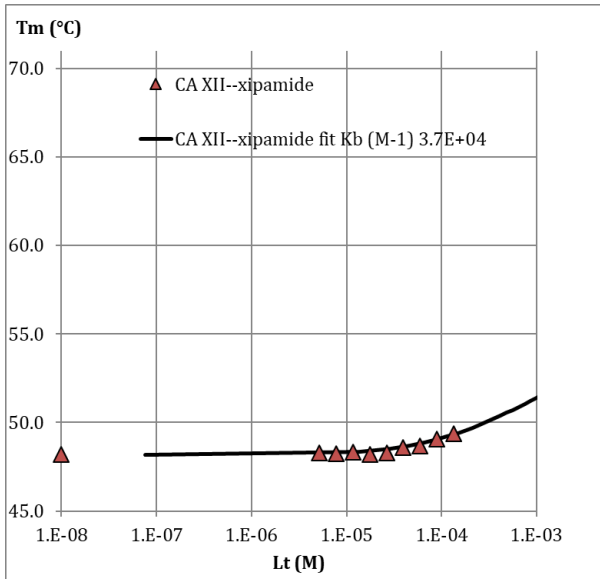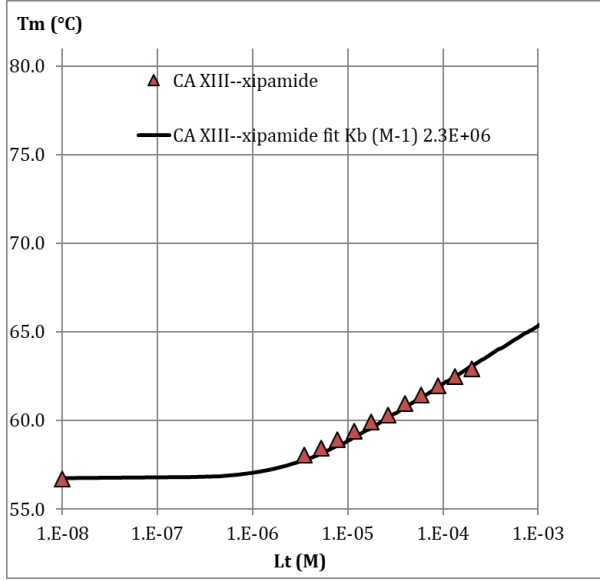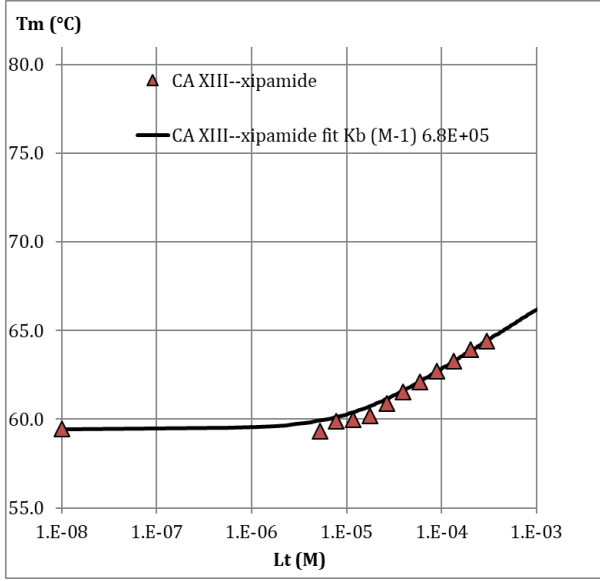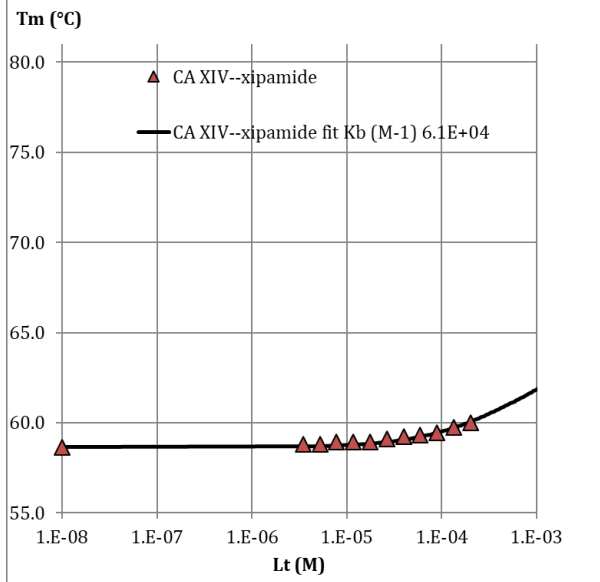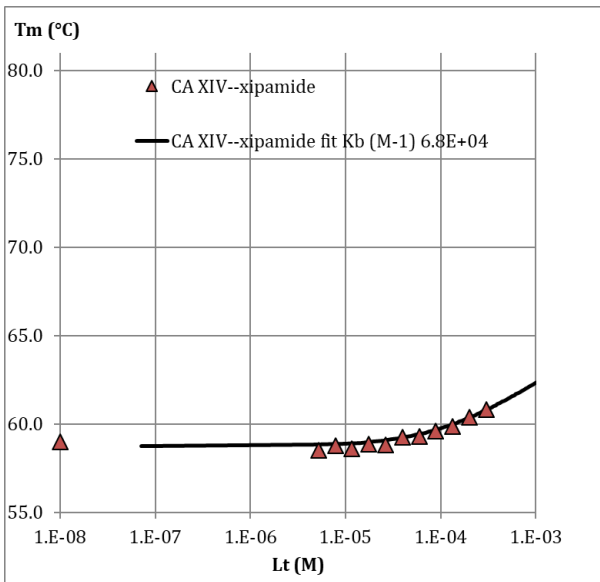

# 15. Furosemide

## Fluorecence-based thermal shift assay

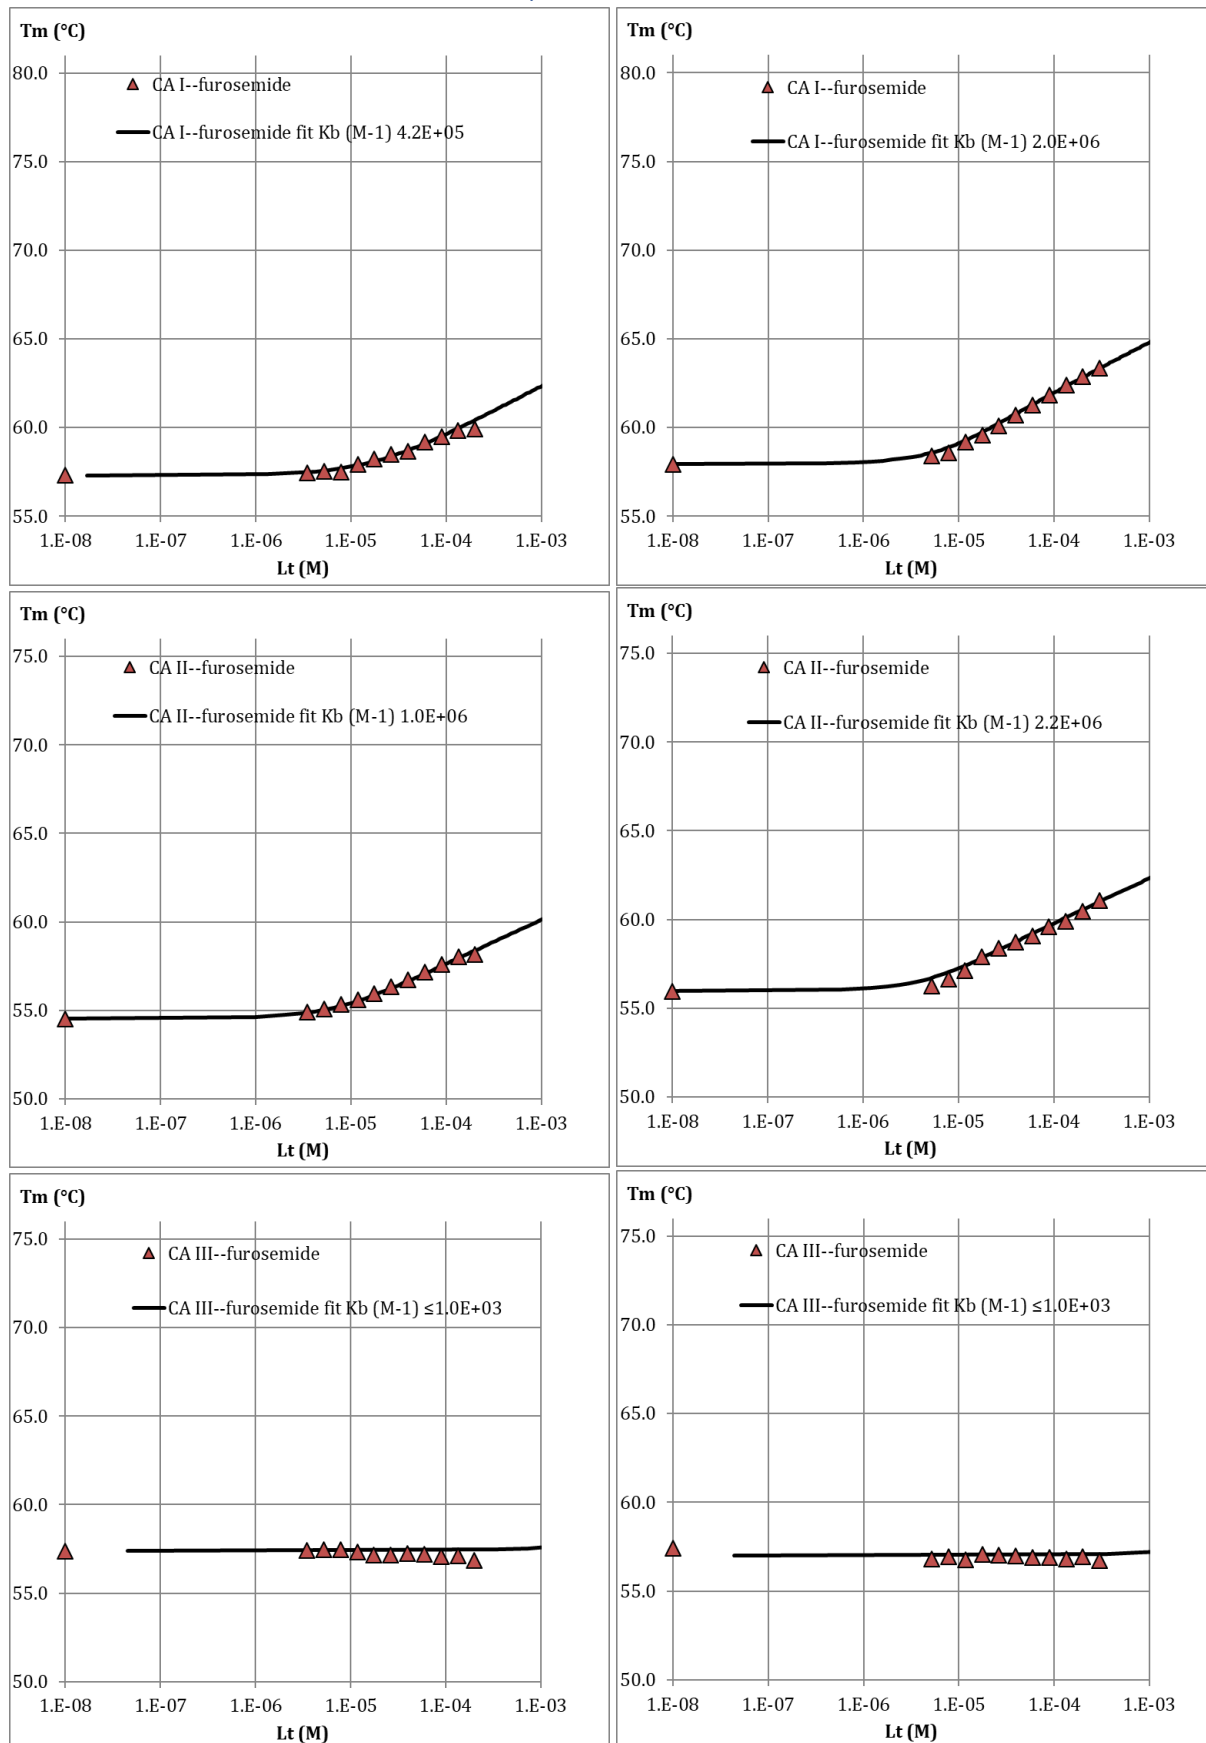

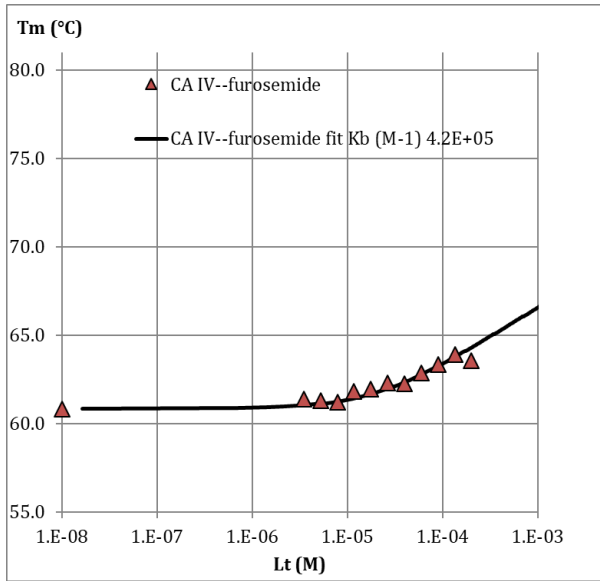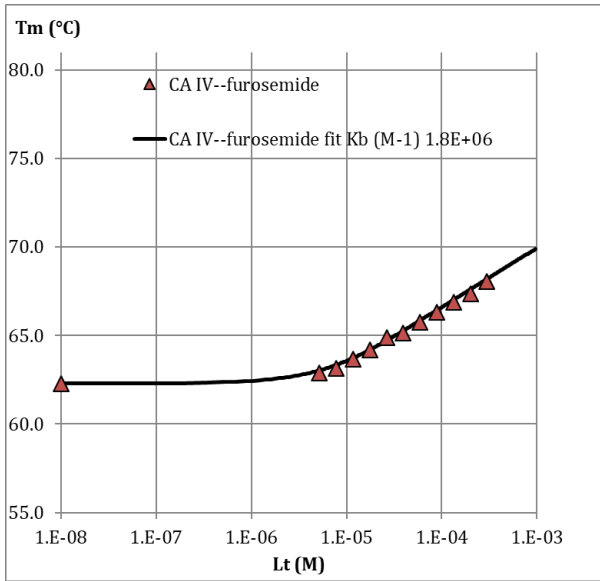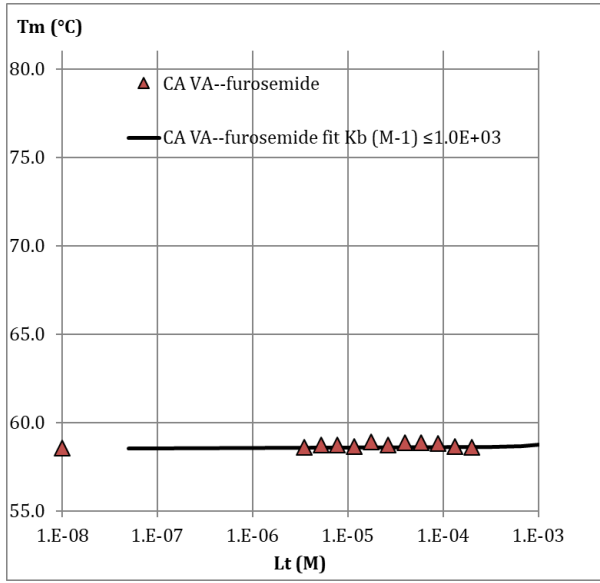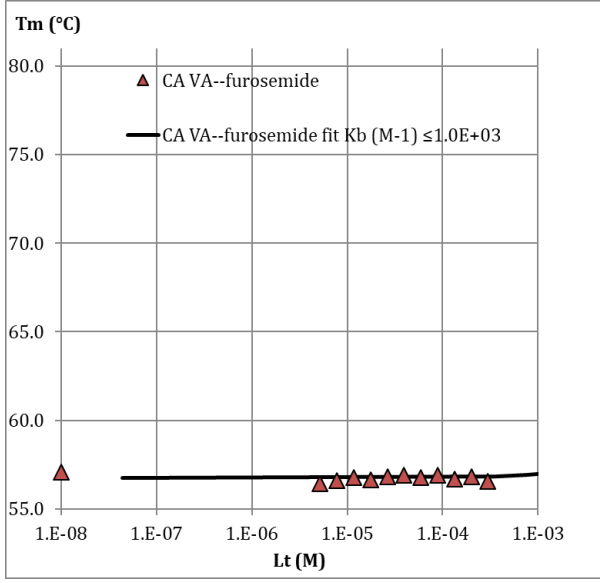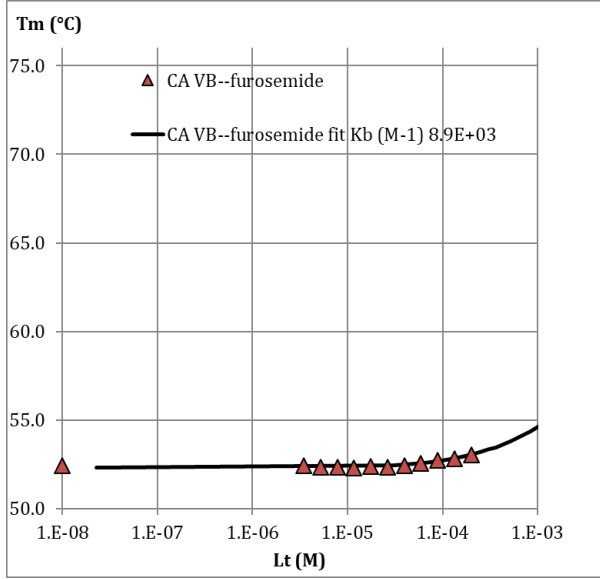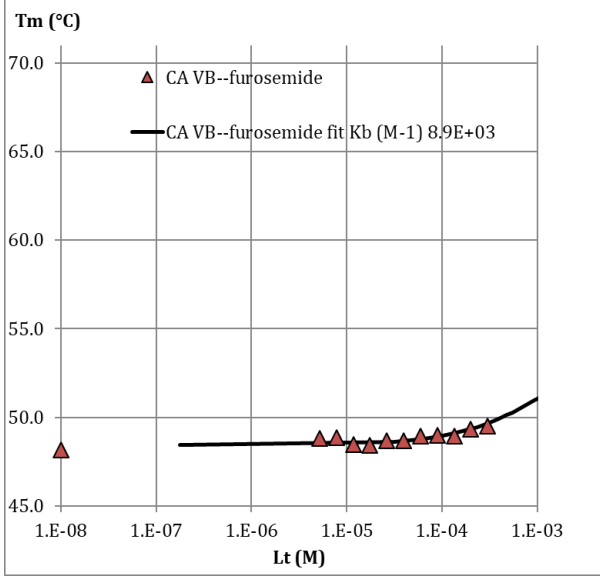

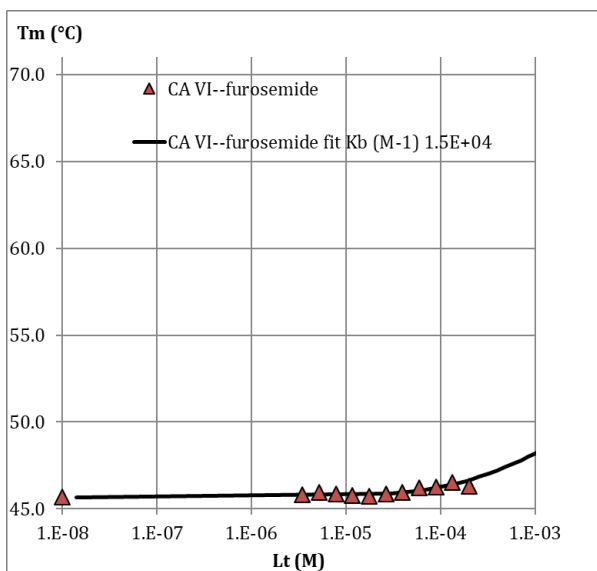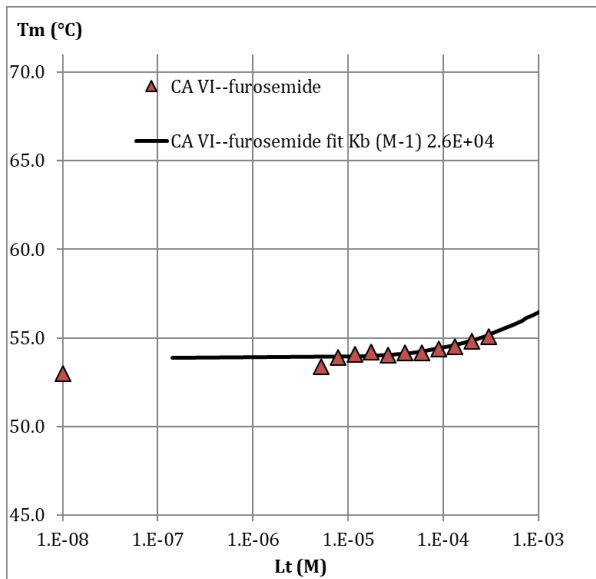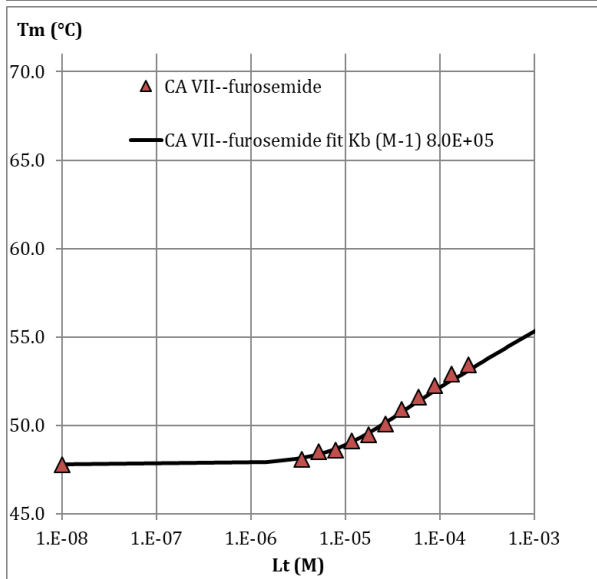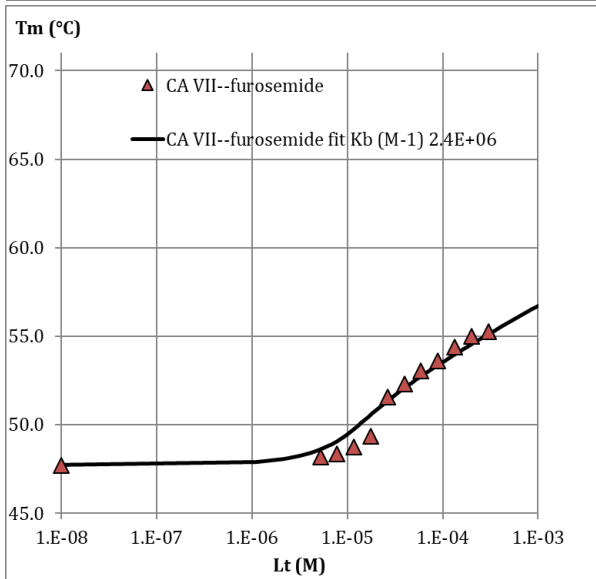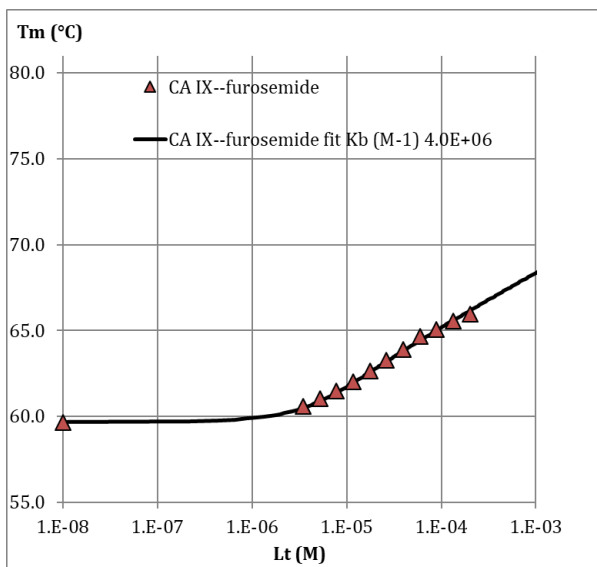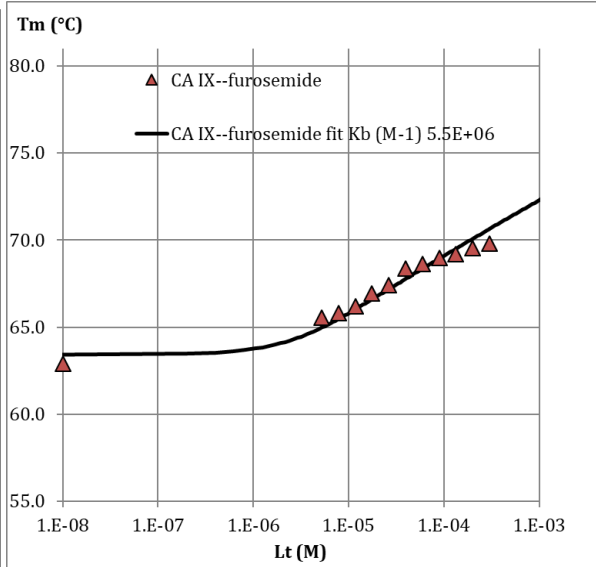

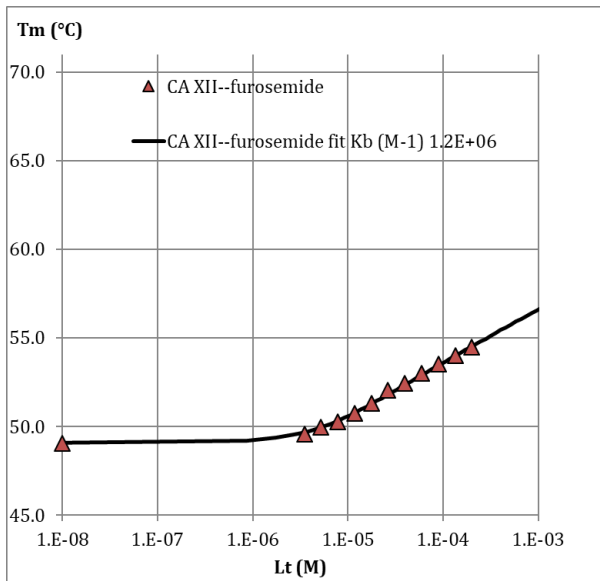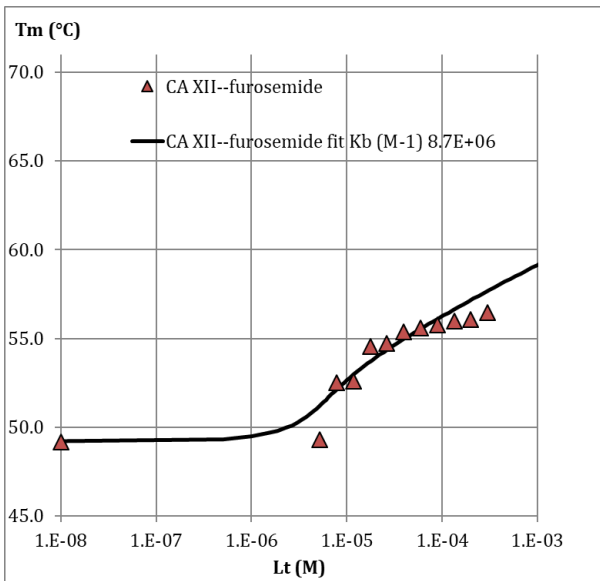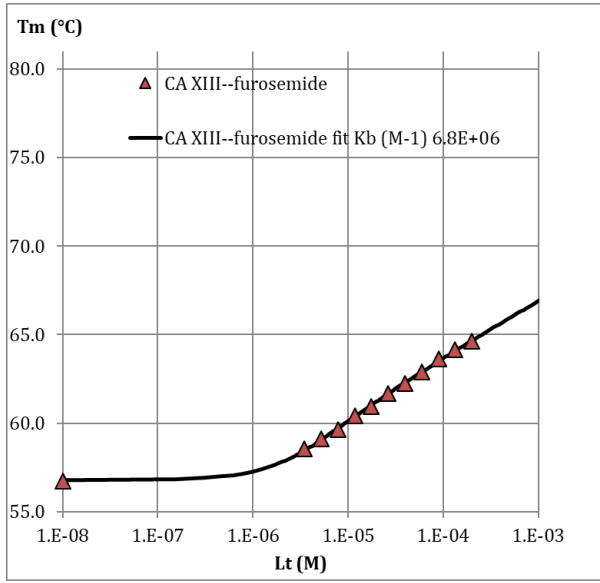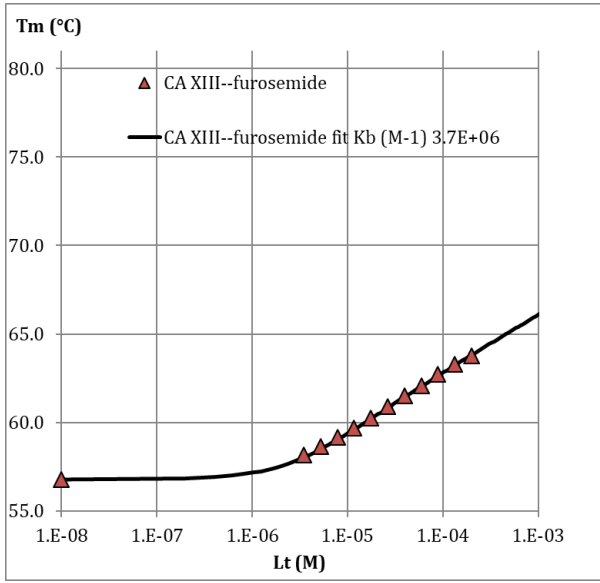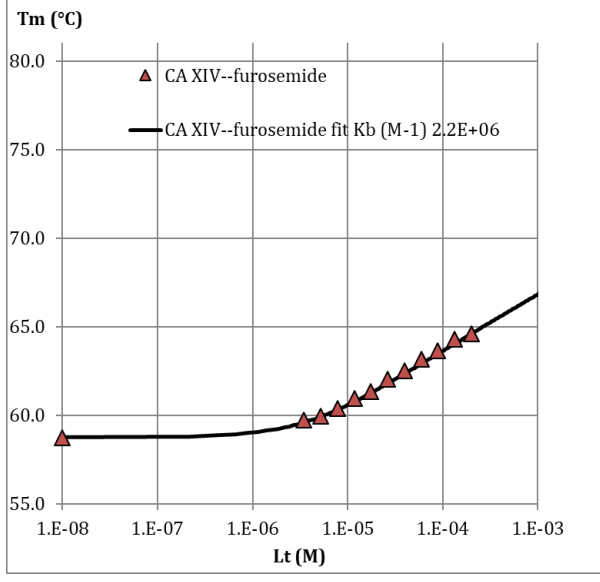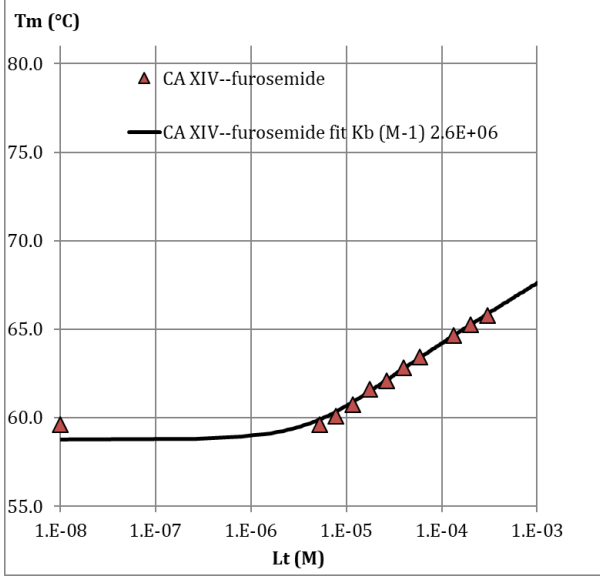

# 16. Chlorthalidone

## Fluorecence-based thermal shift assay

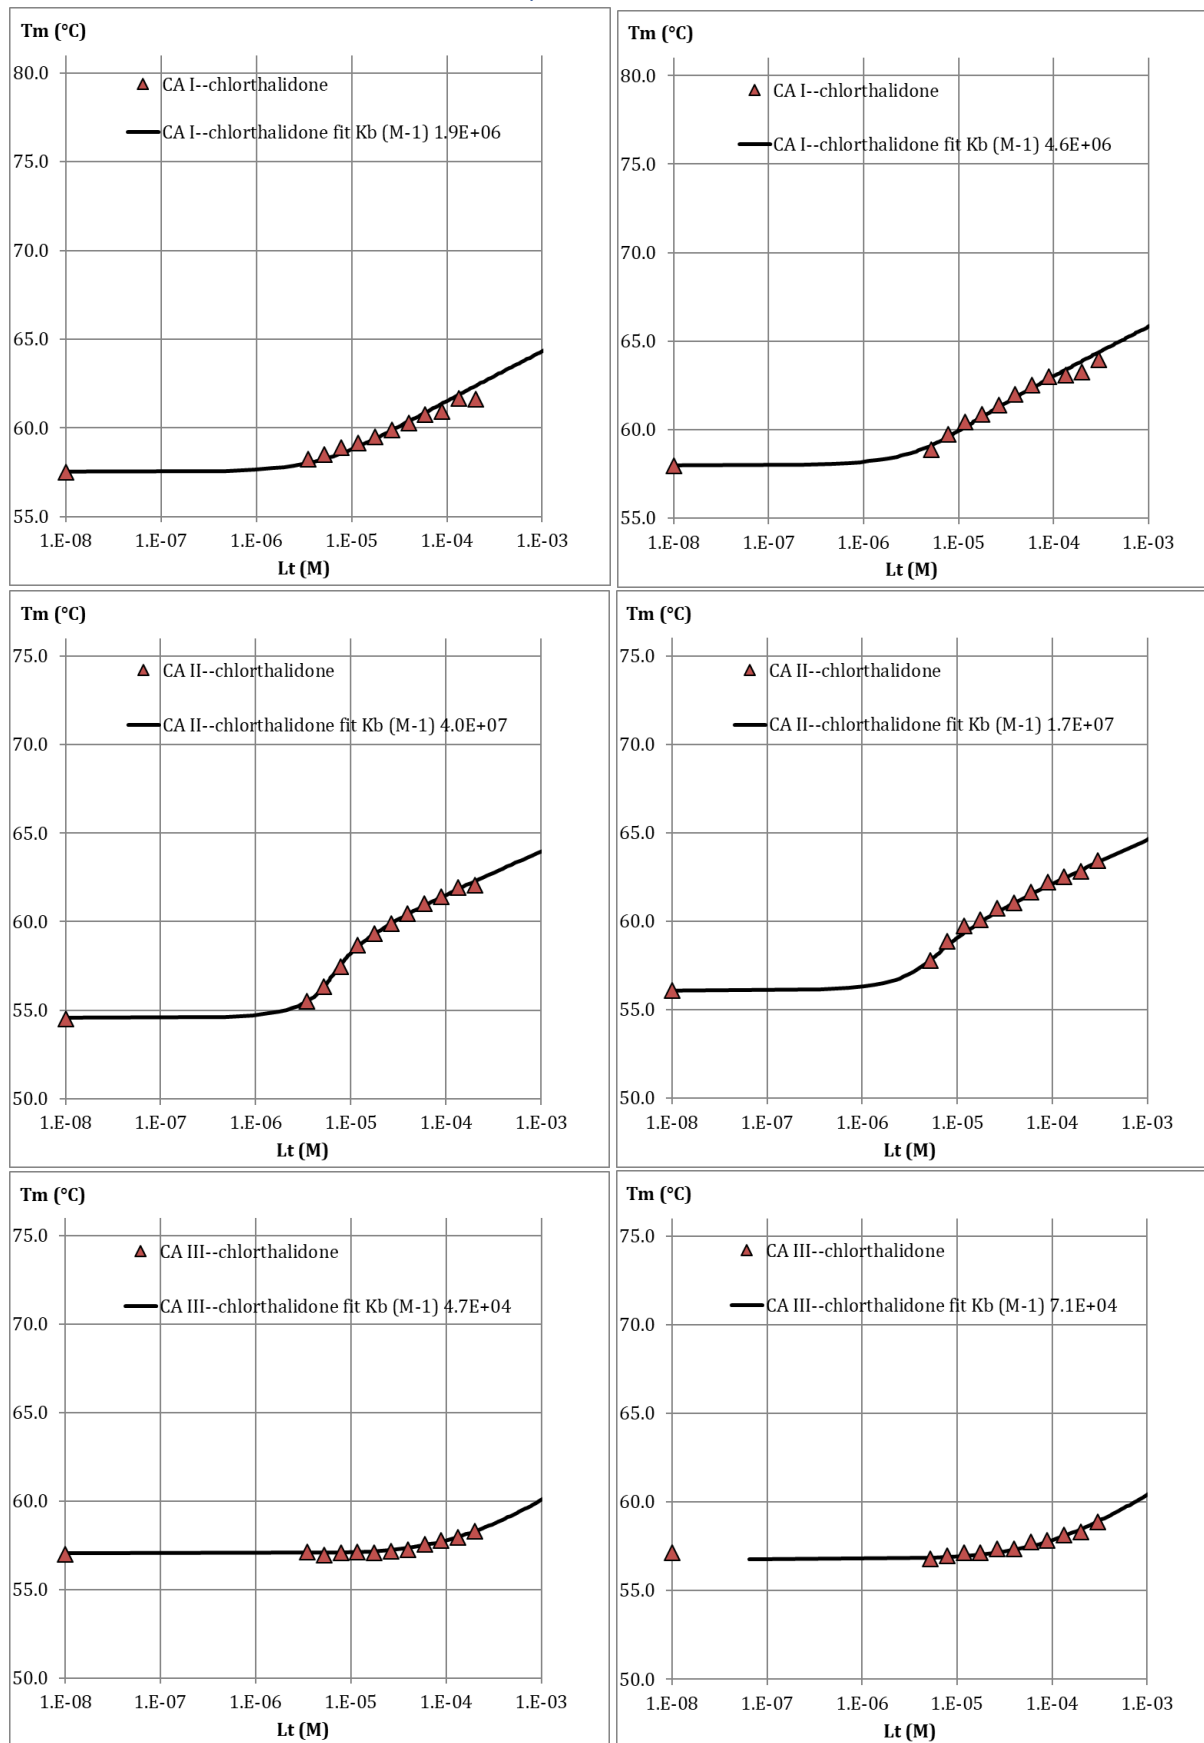

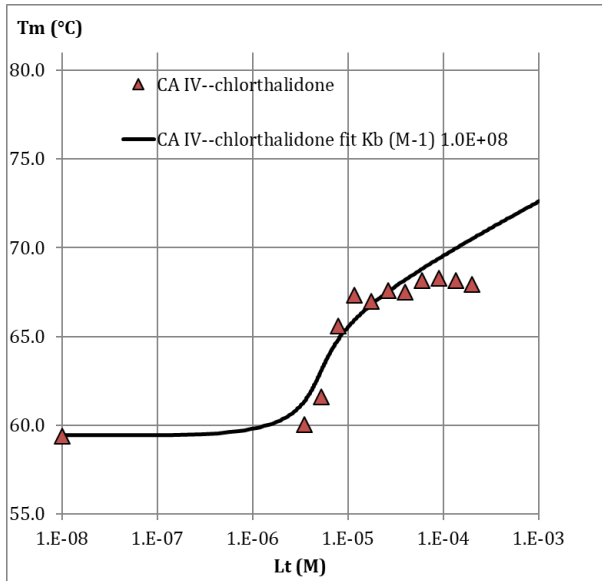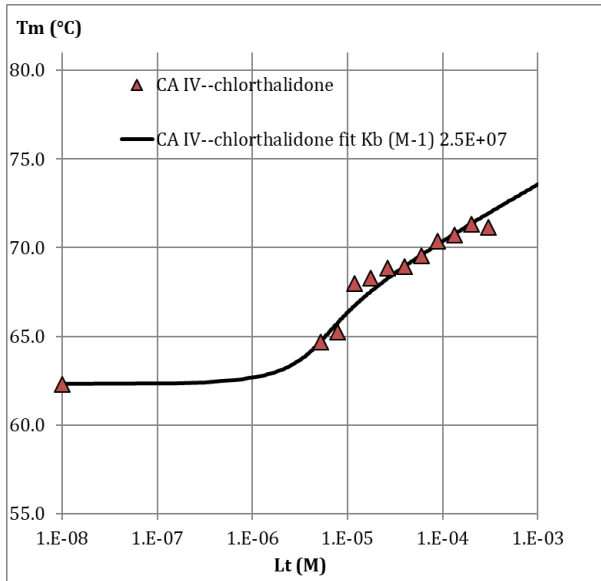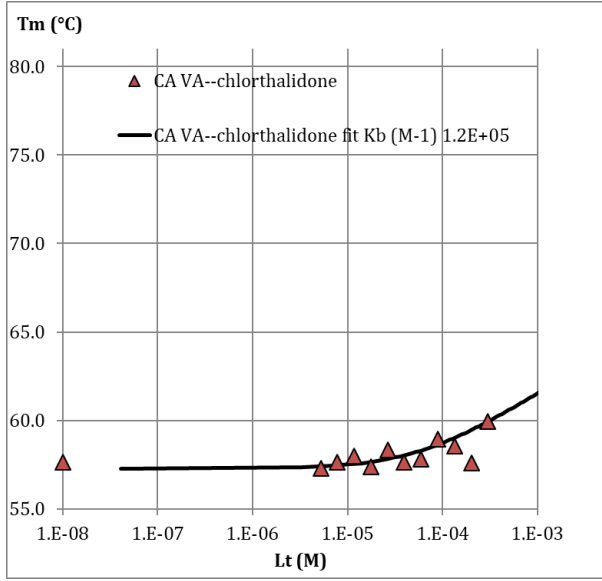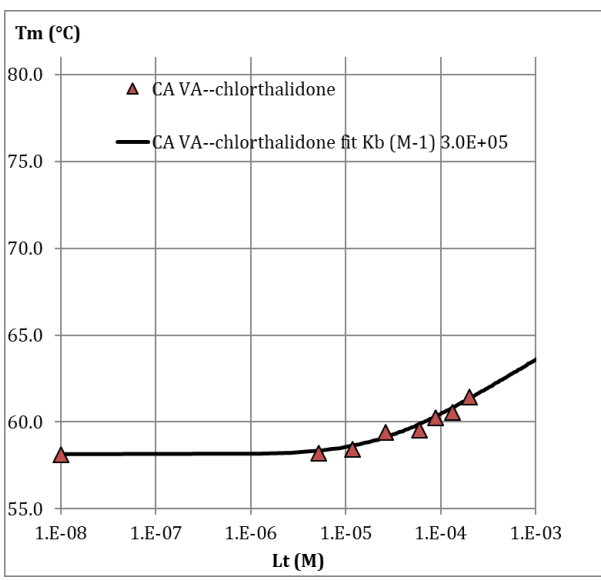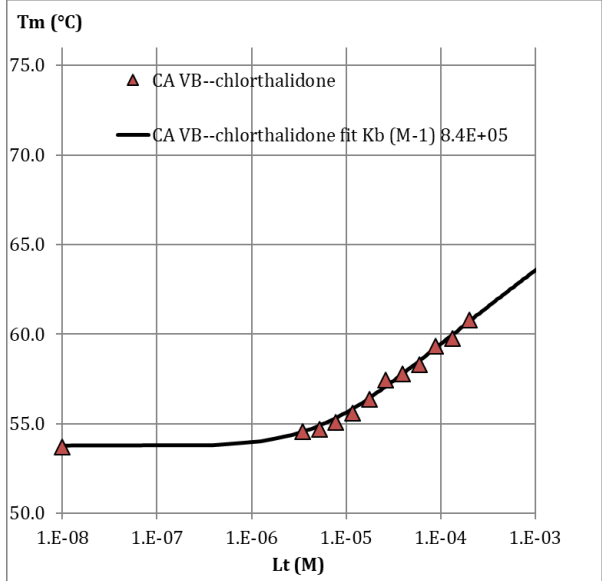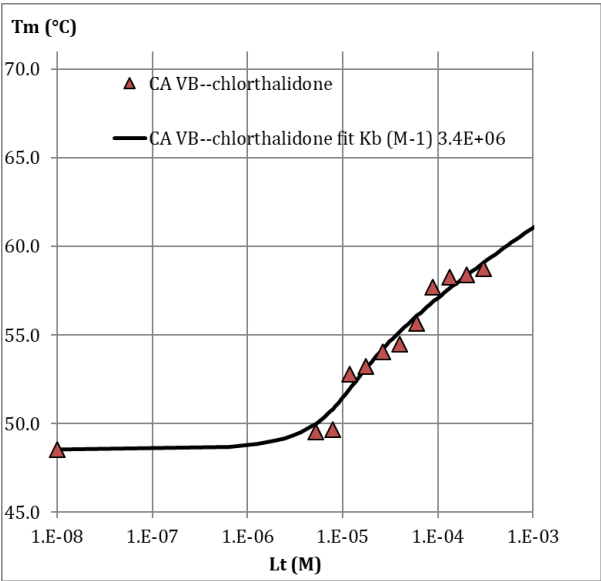

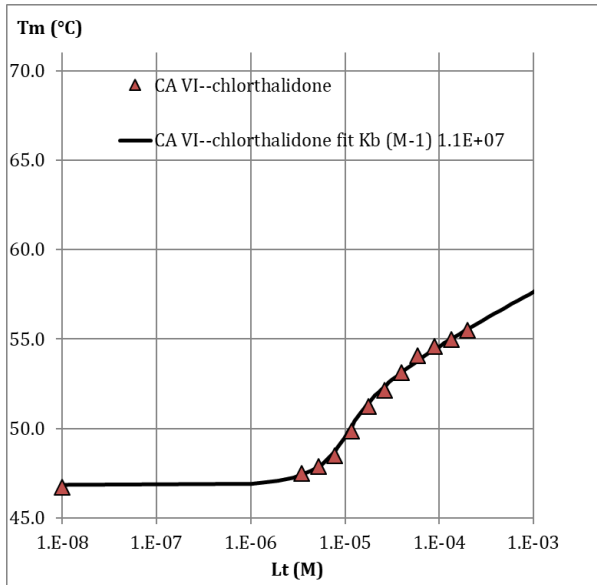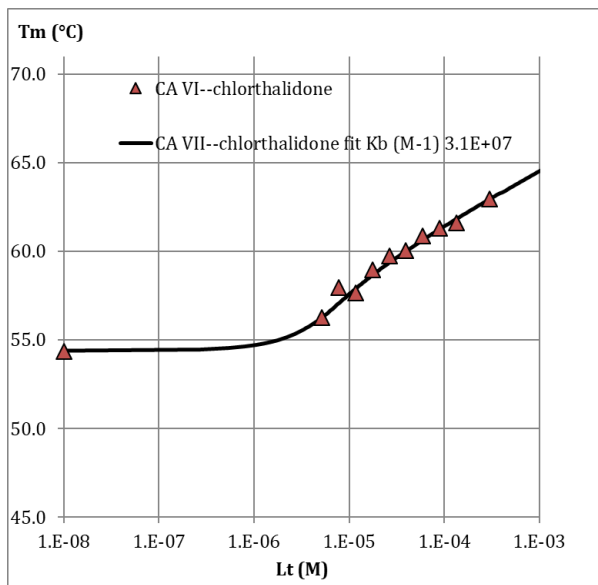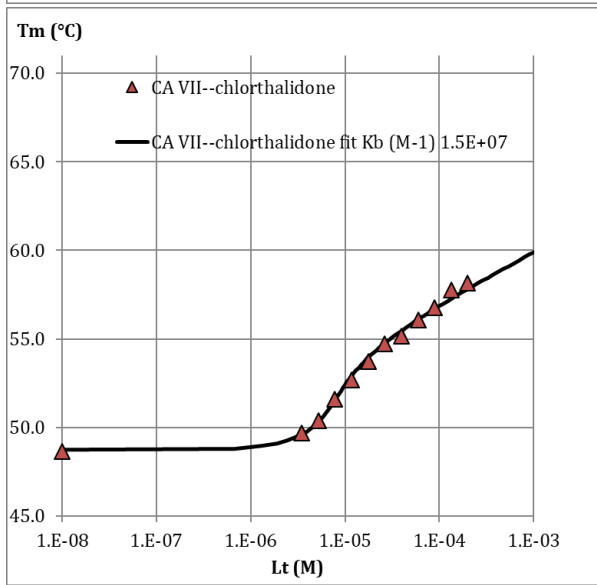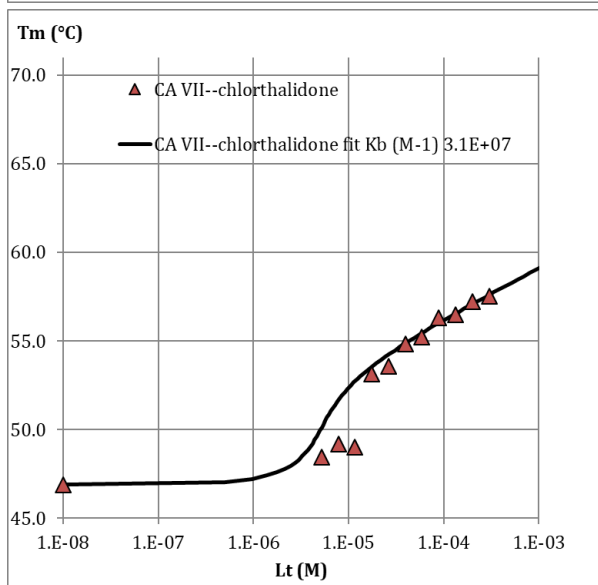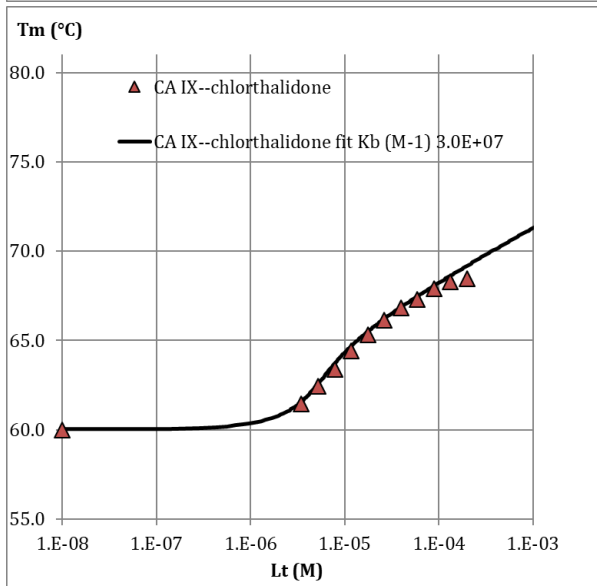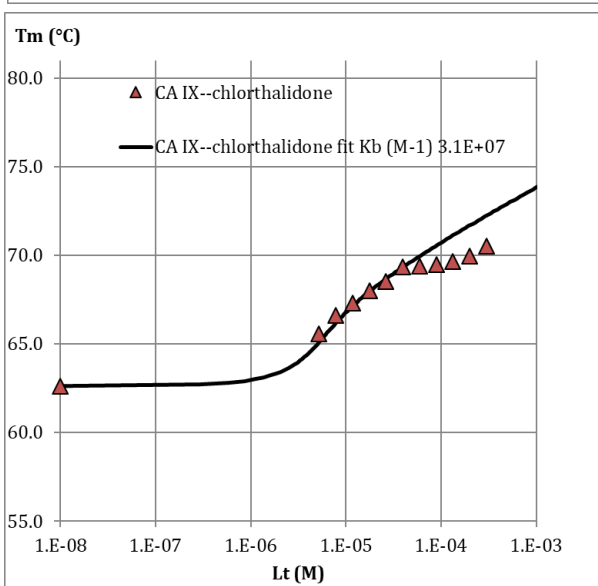



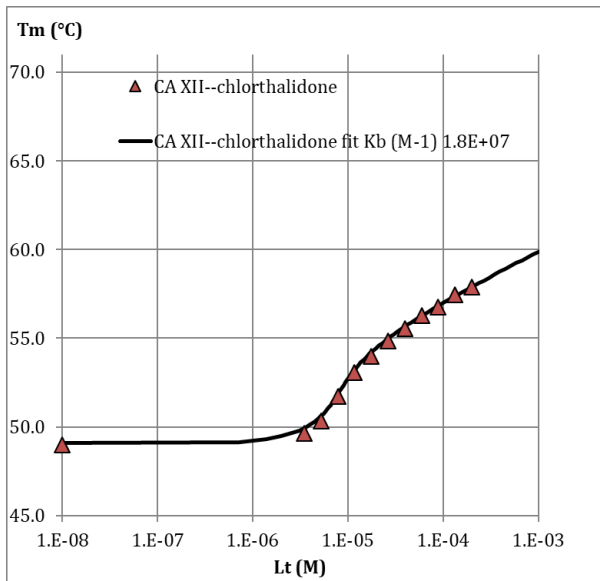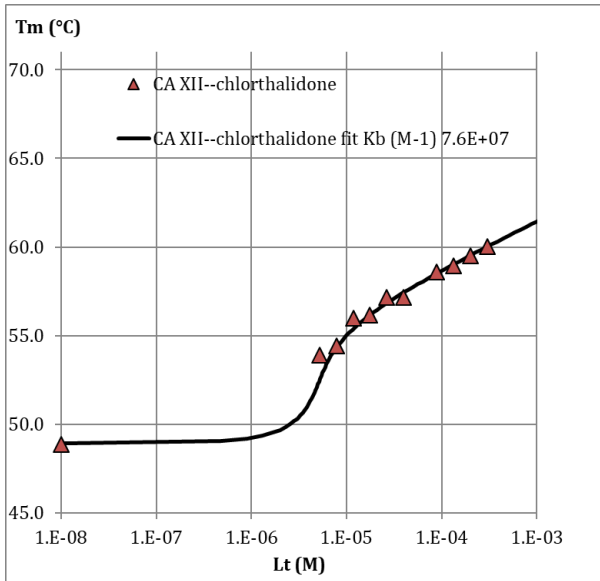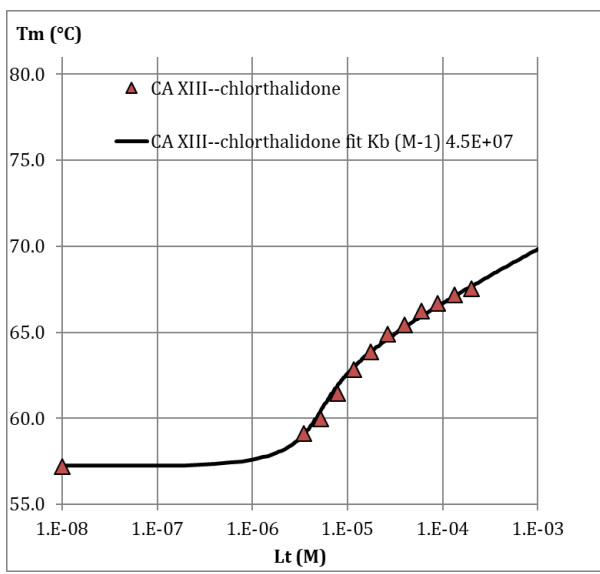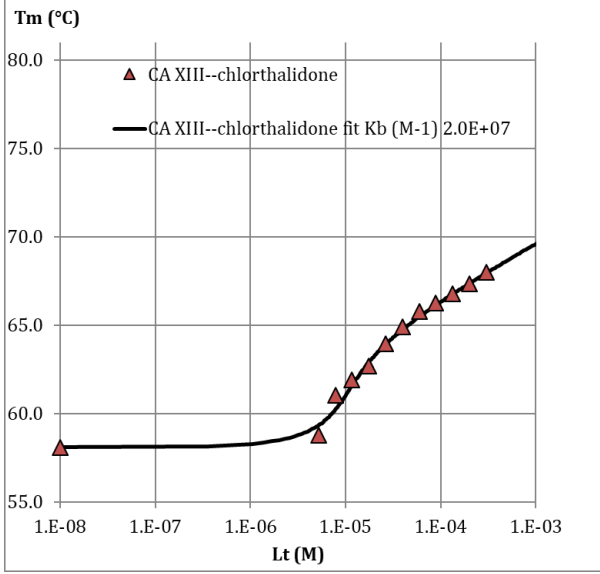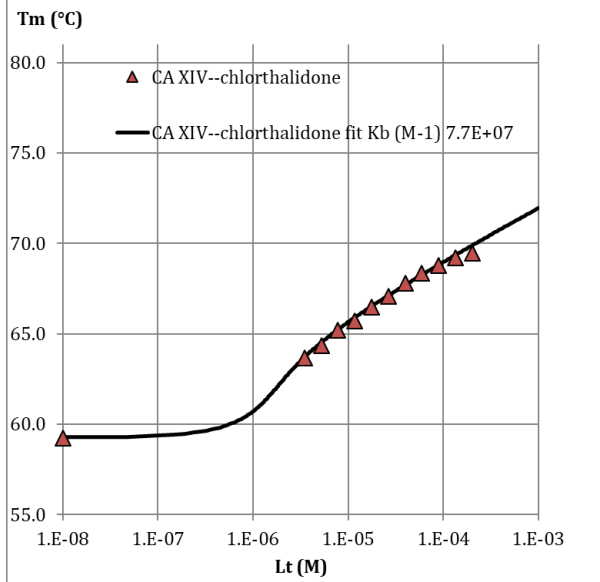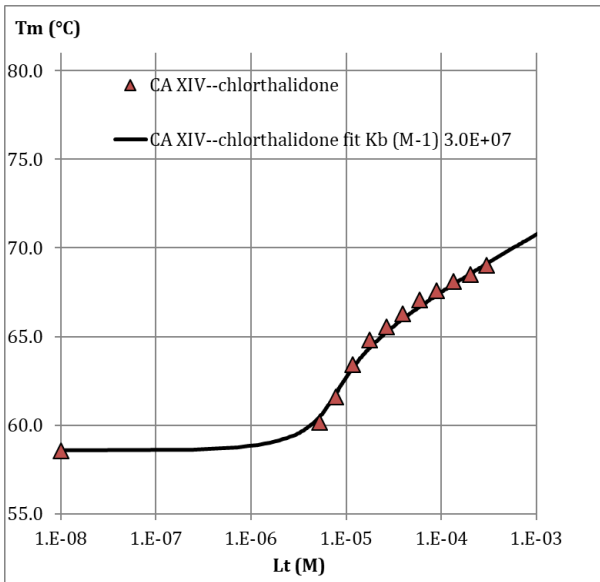

# CO<sub>2</sub> hydration activity inhibition

## CA XII - chlorthalidone

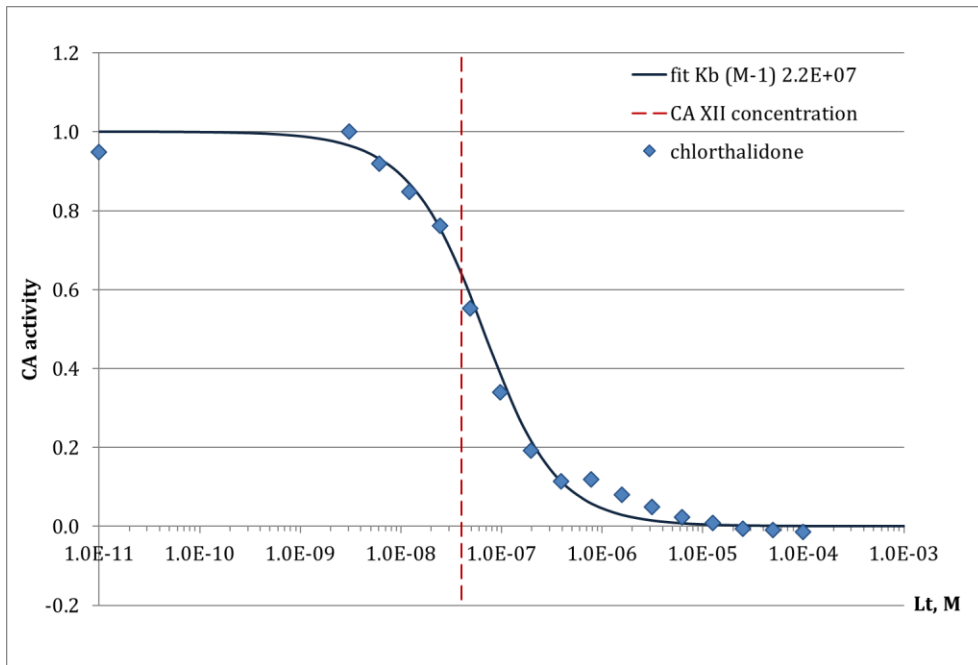

# Isothermal titration calorimetry

## CA II – chlorthalidone

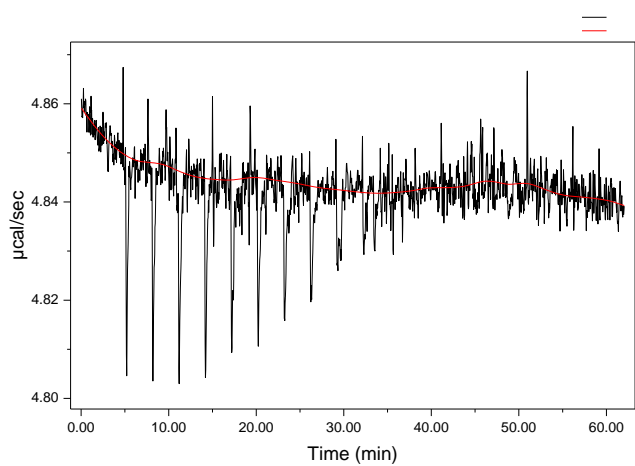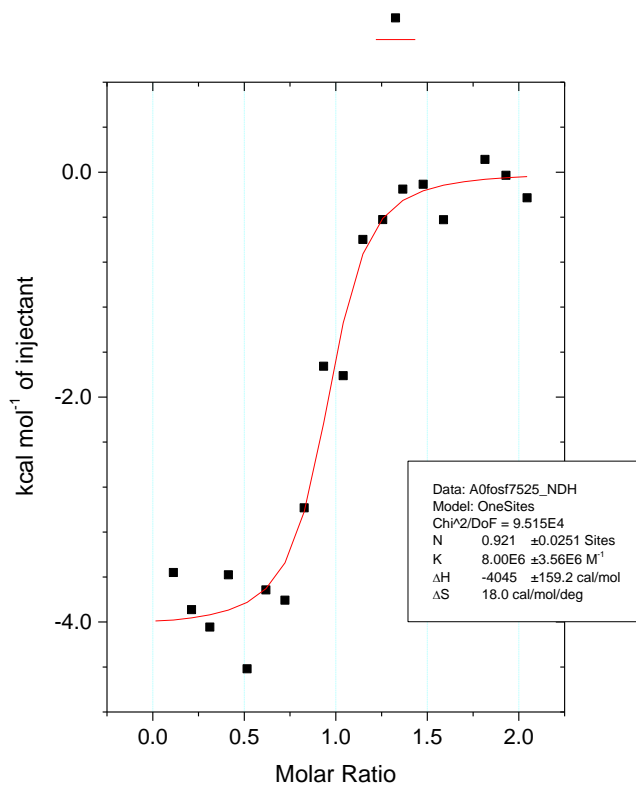

## CA II – chlorthalidone

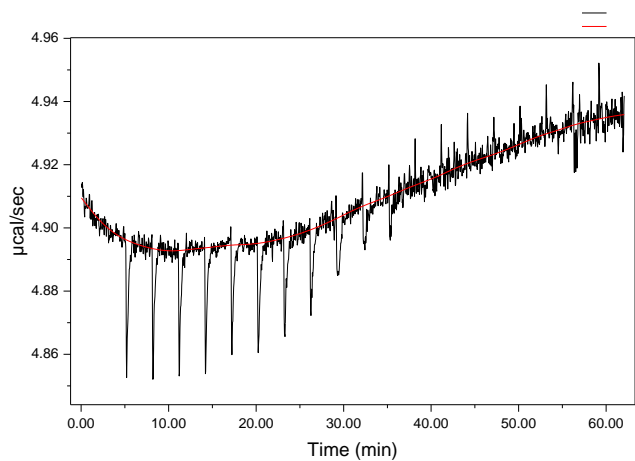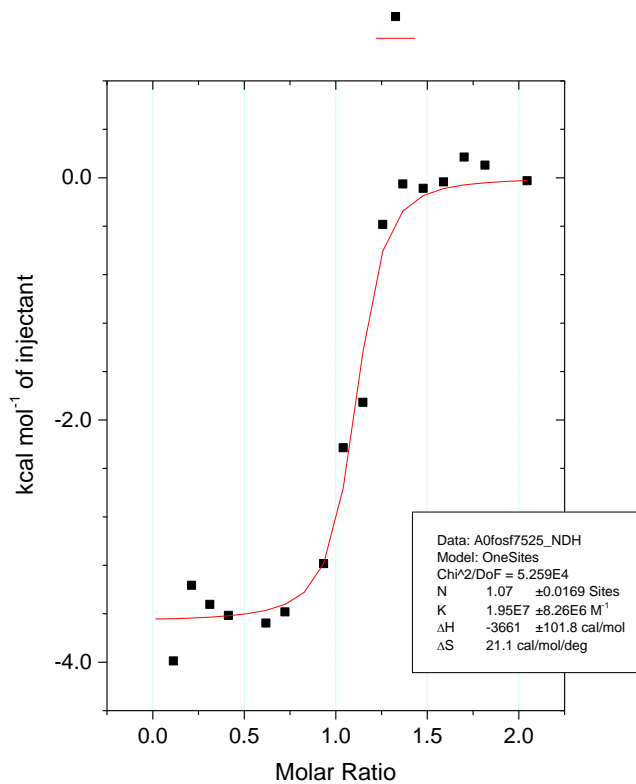

# 17. Clorexolone

## Fluorecence-based thermal shift assay

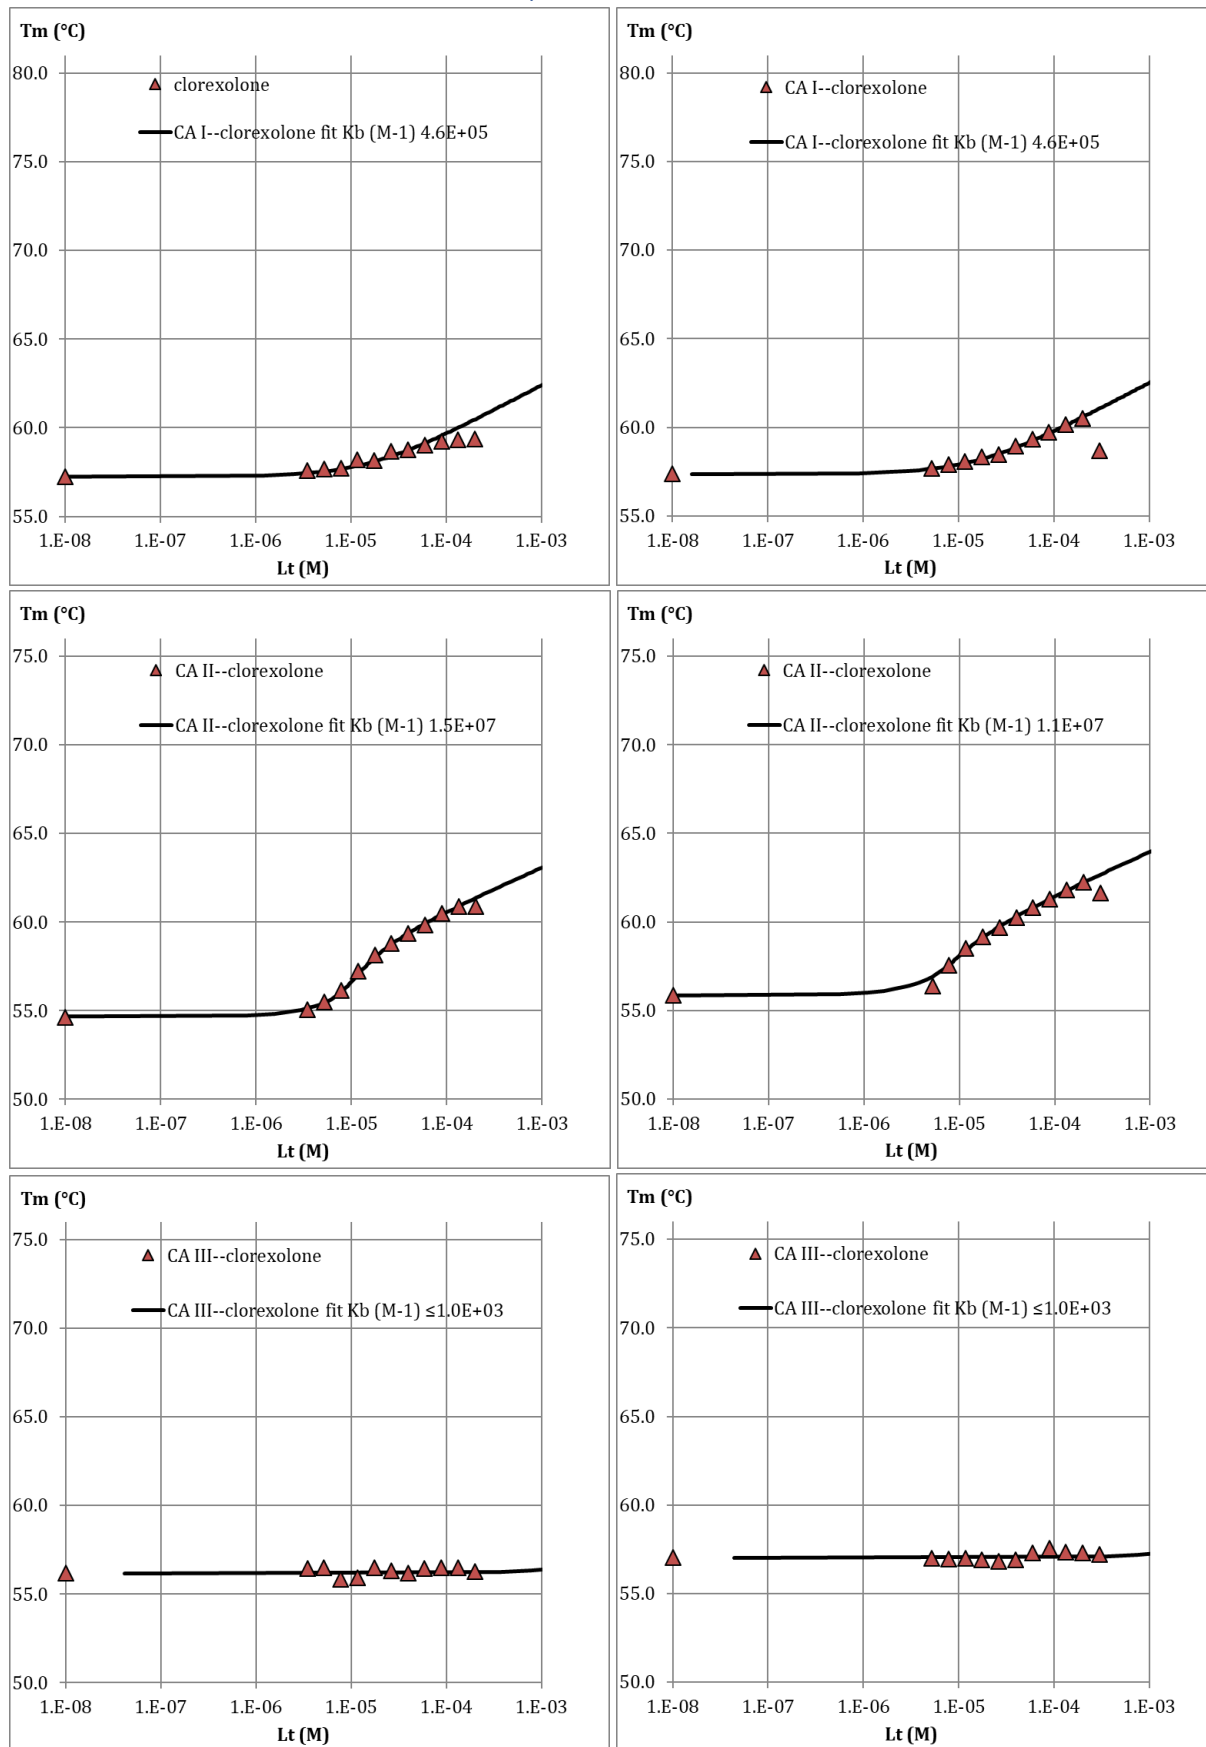

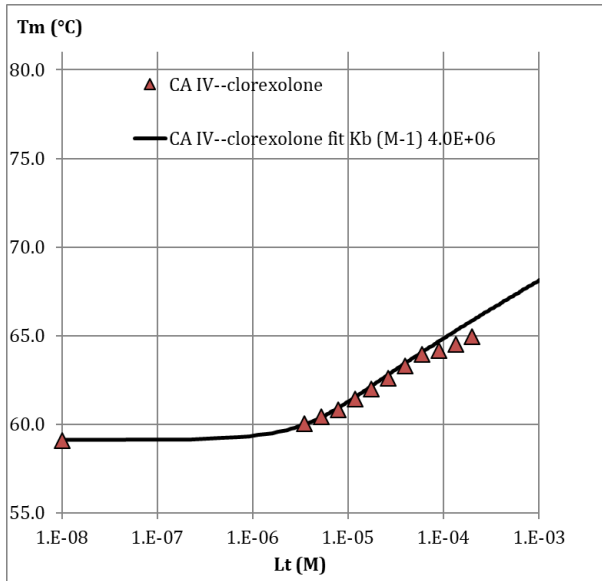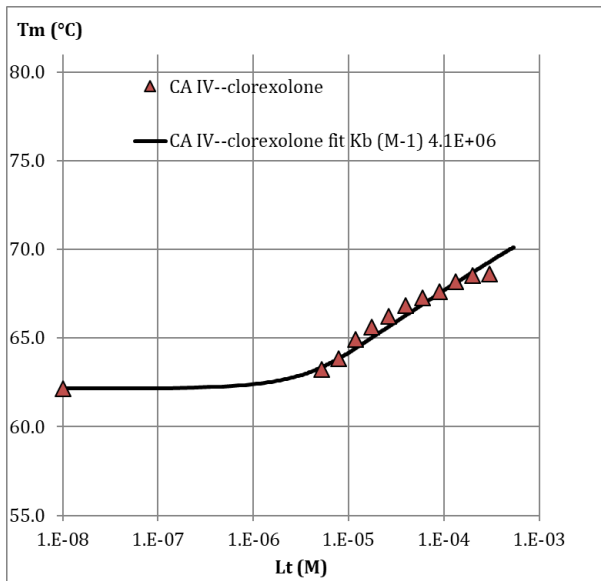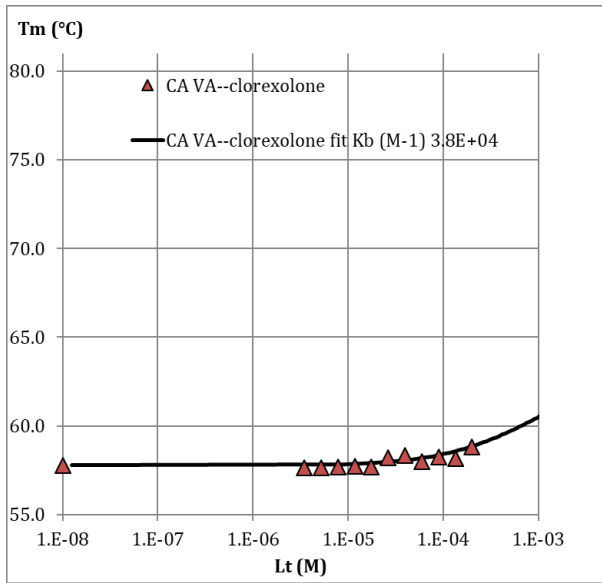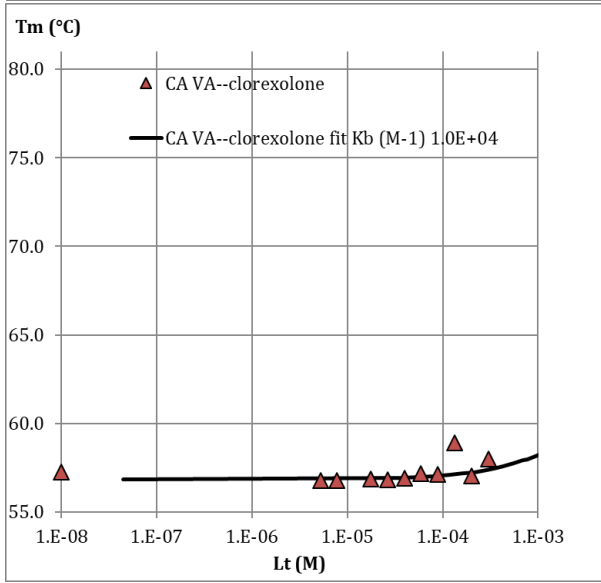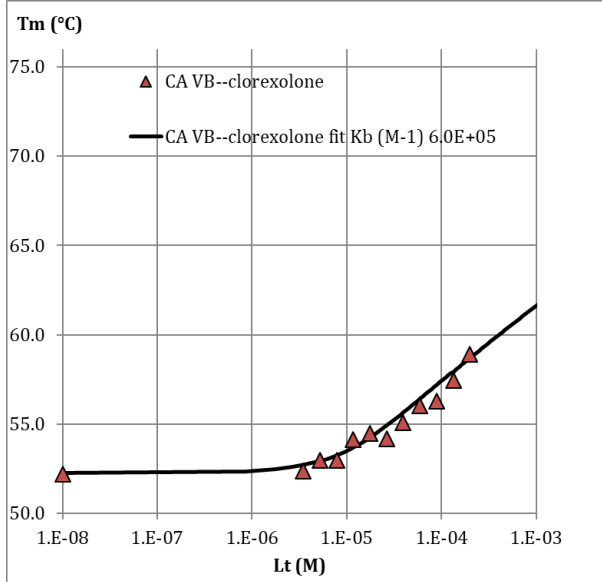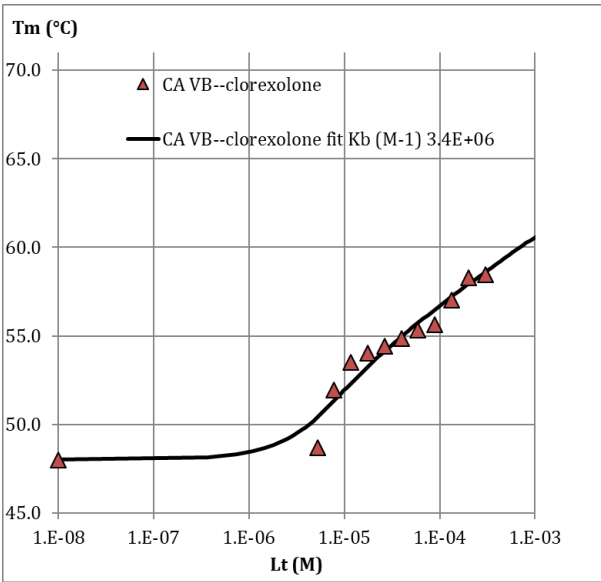

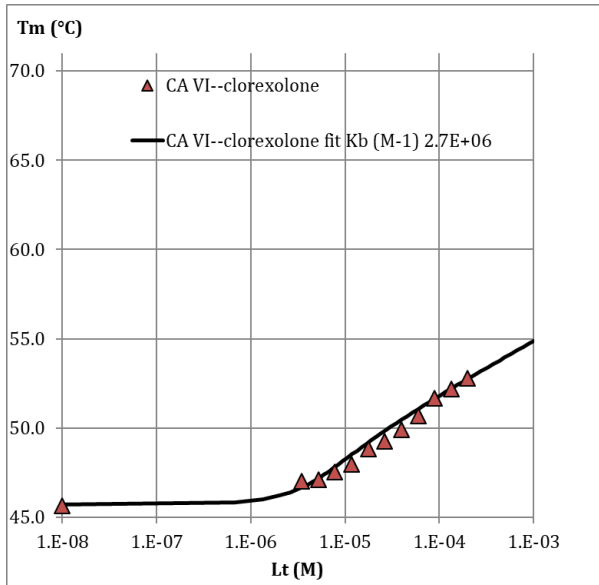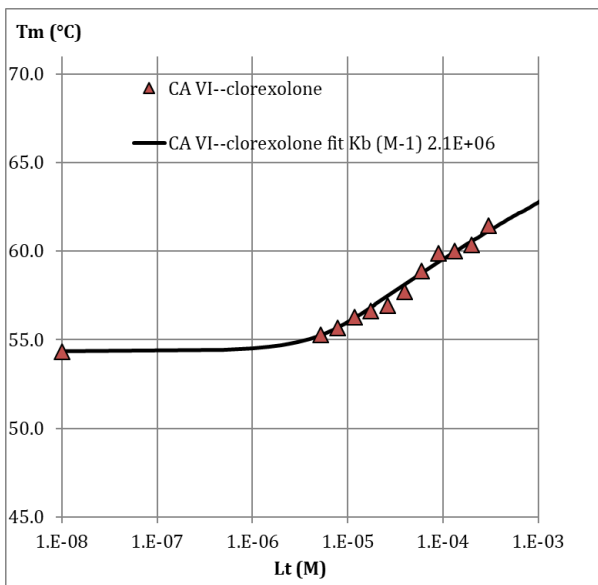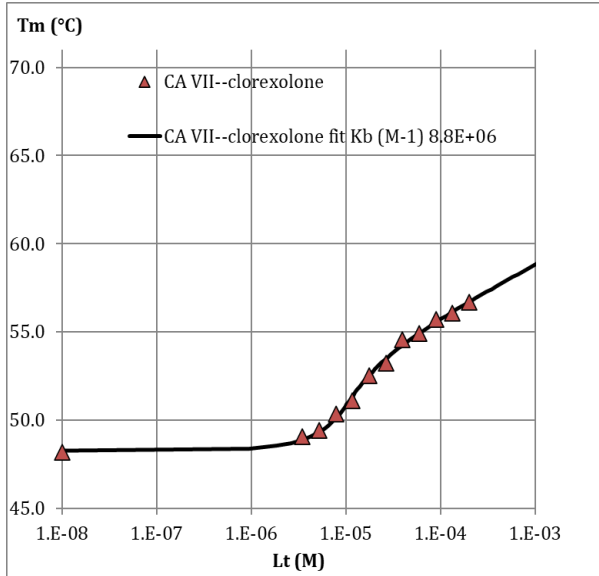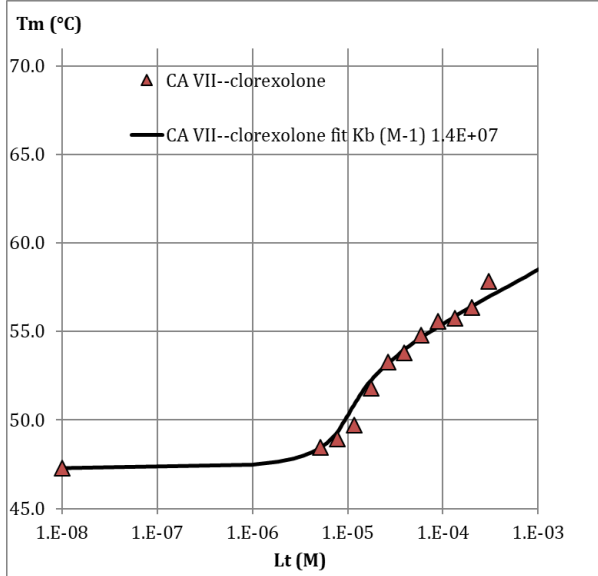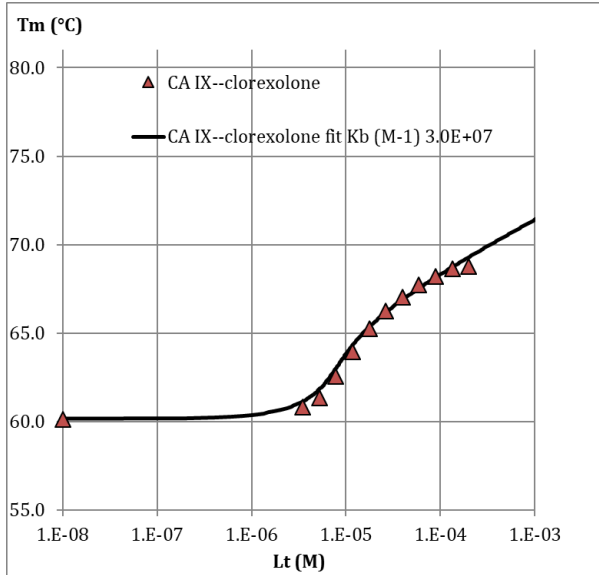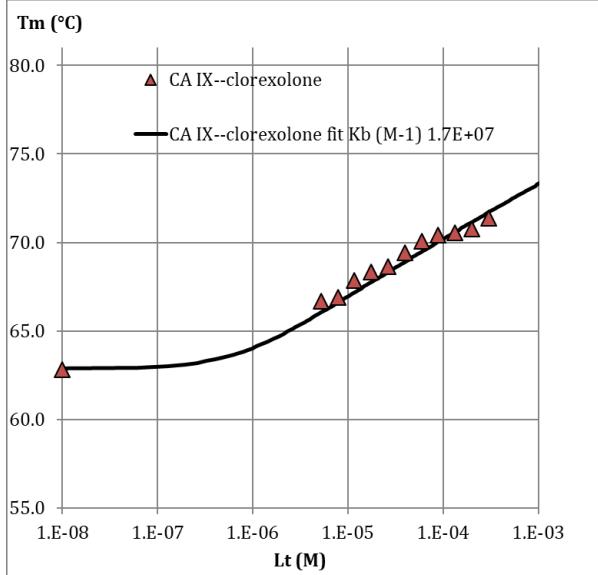

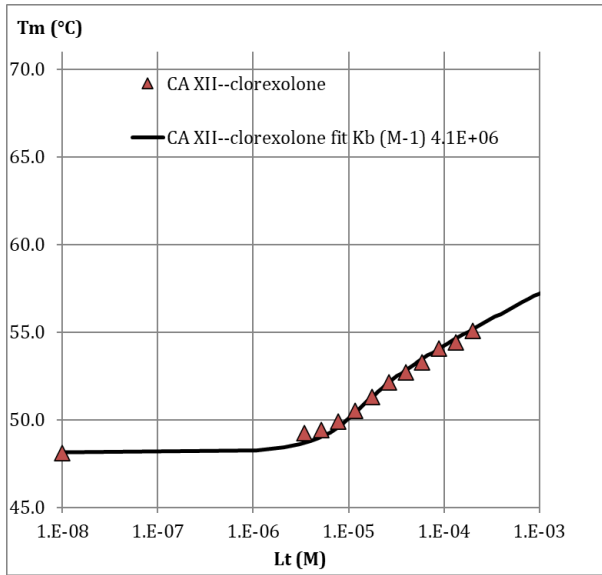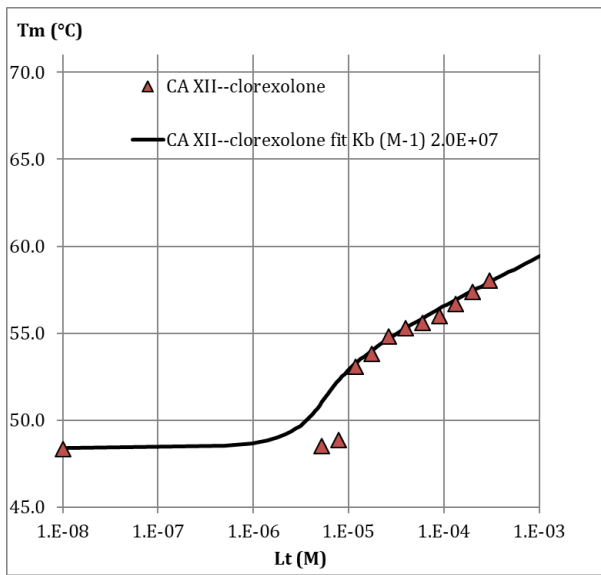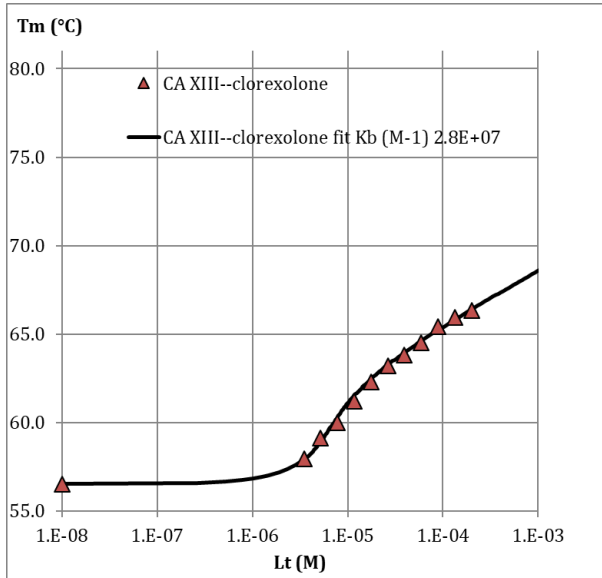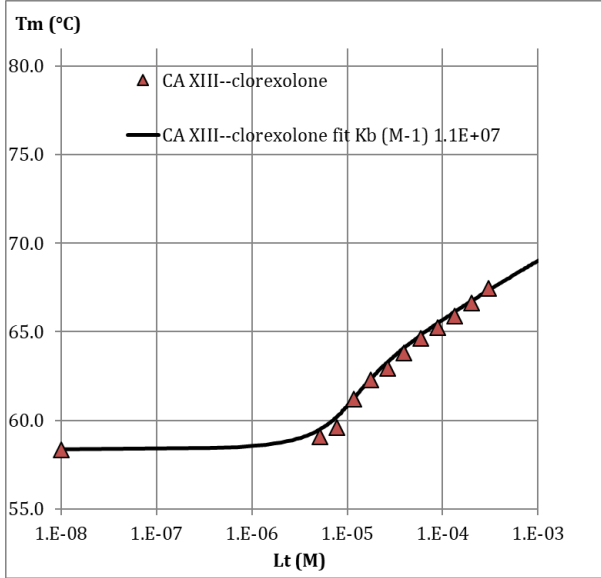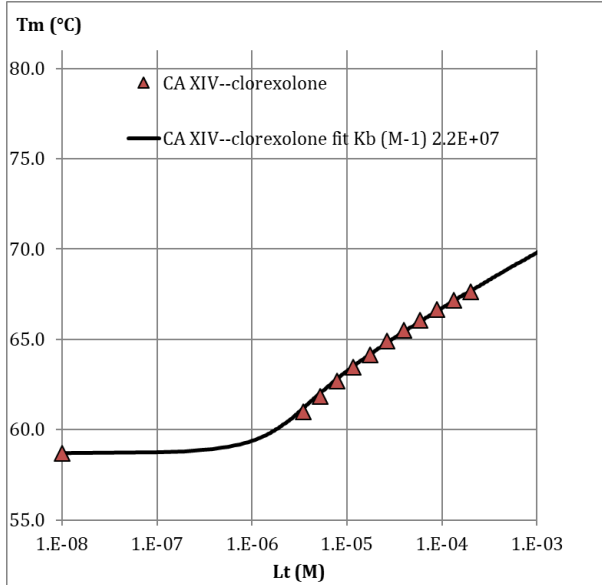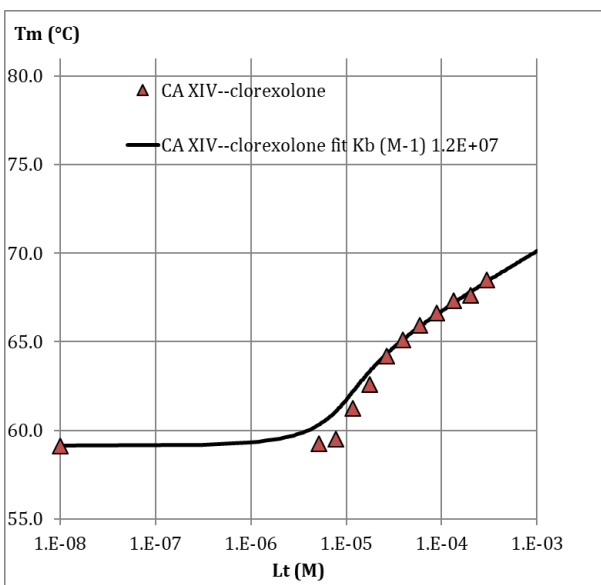

# 18. Quinethazone

## Fluorecence-based thermal shift assay

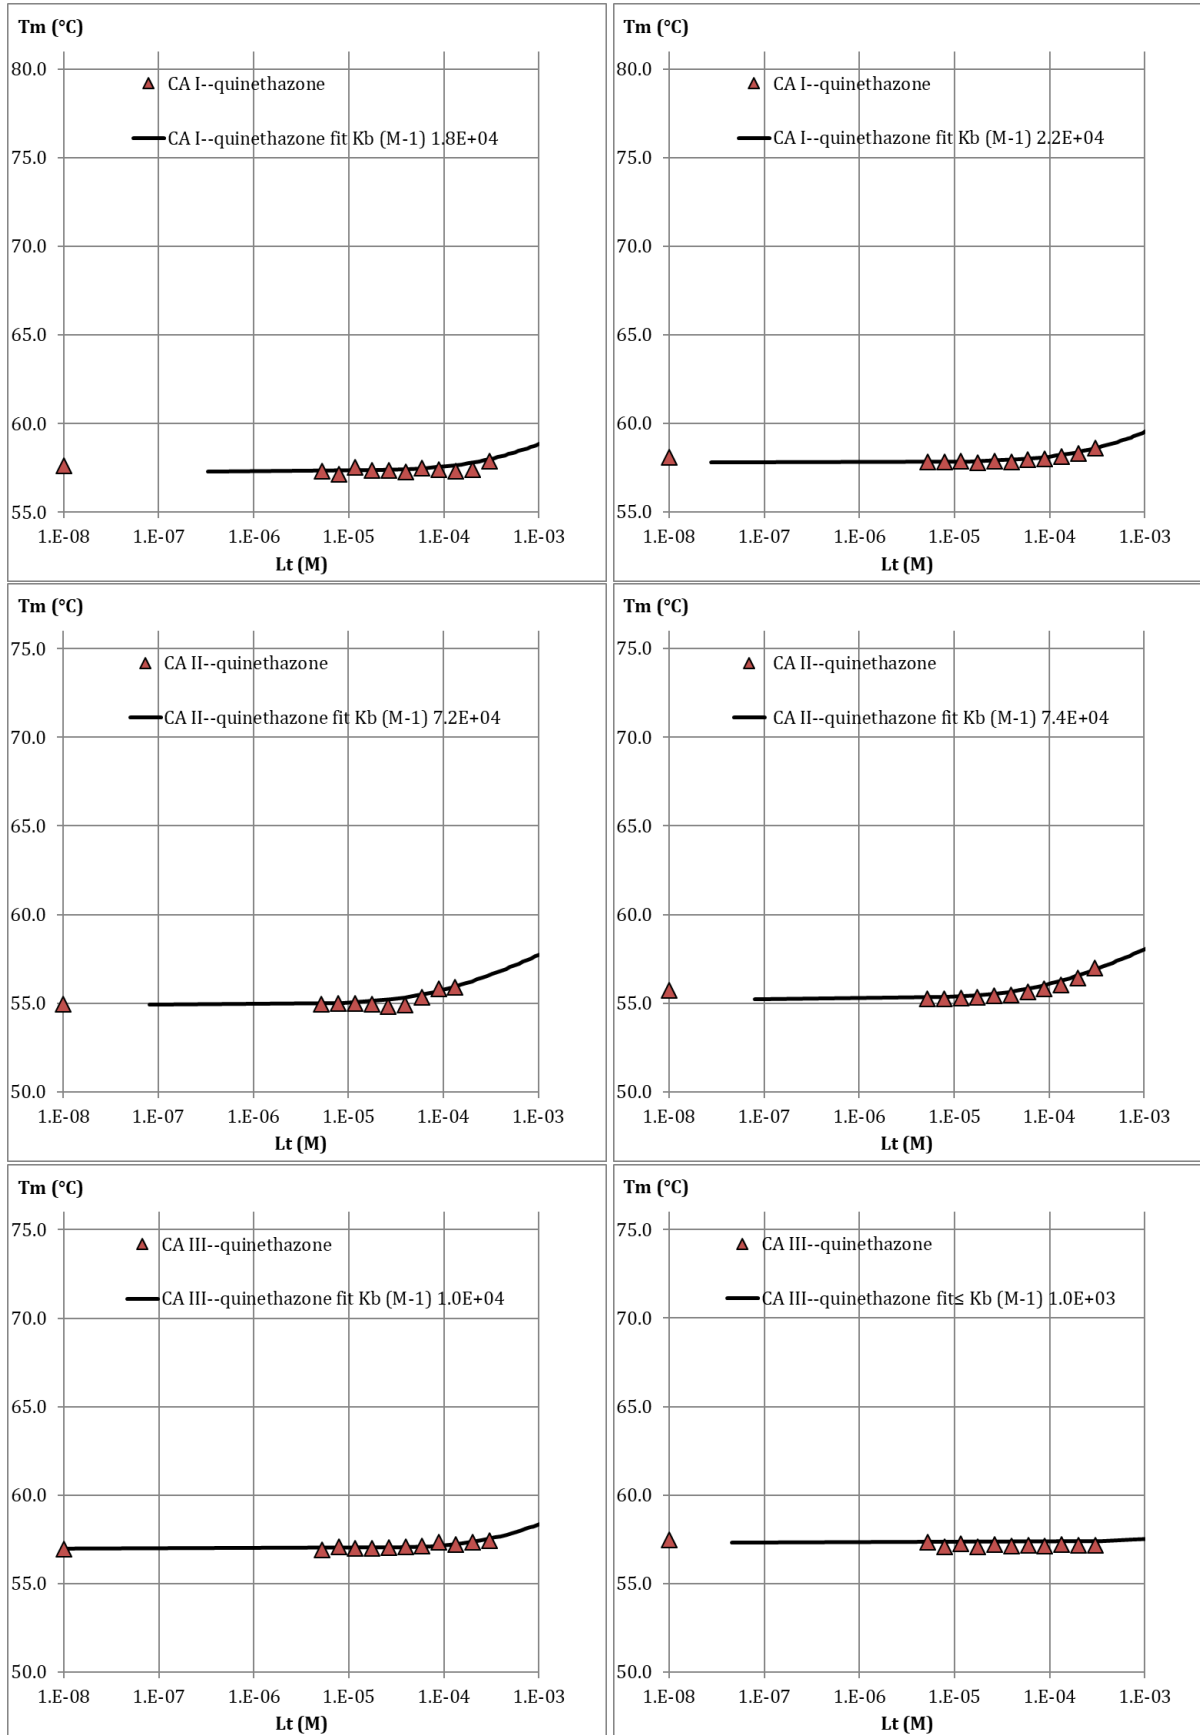



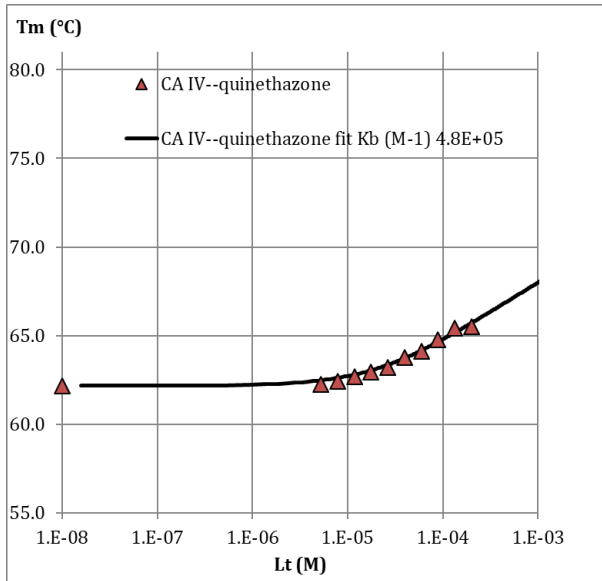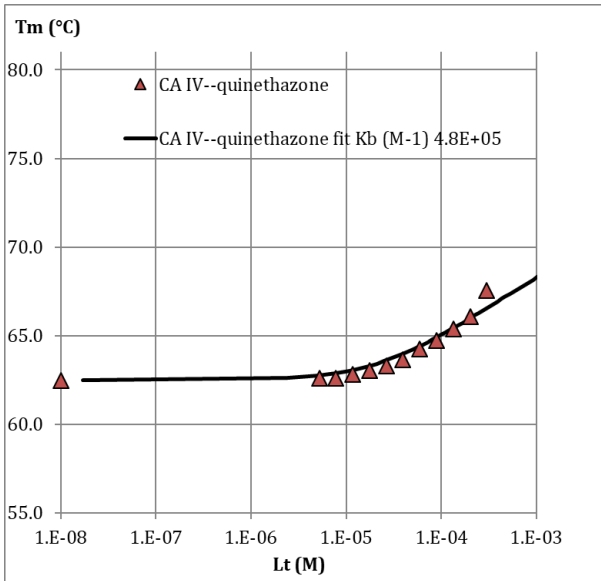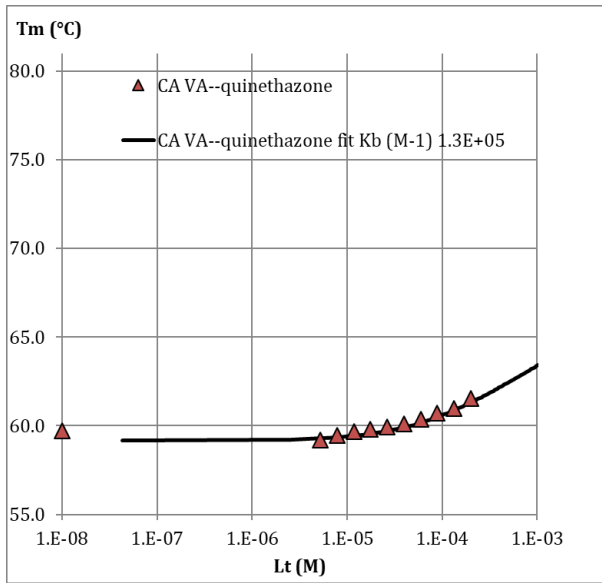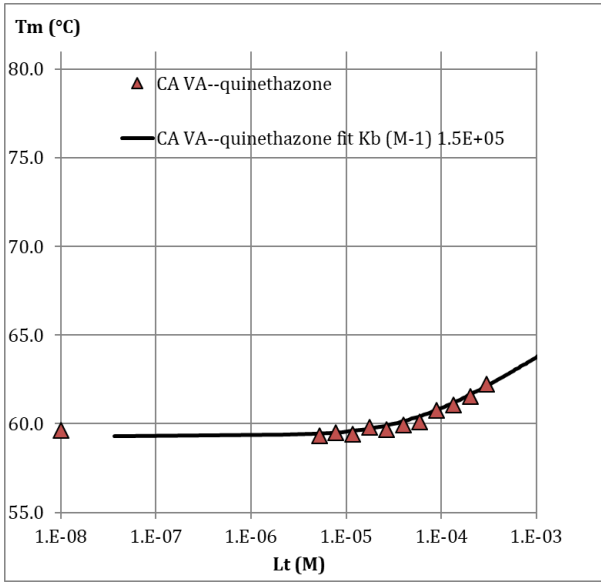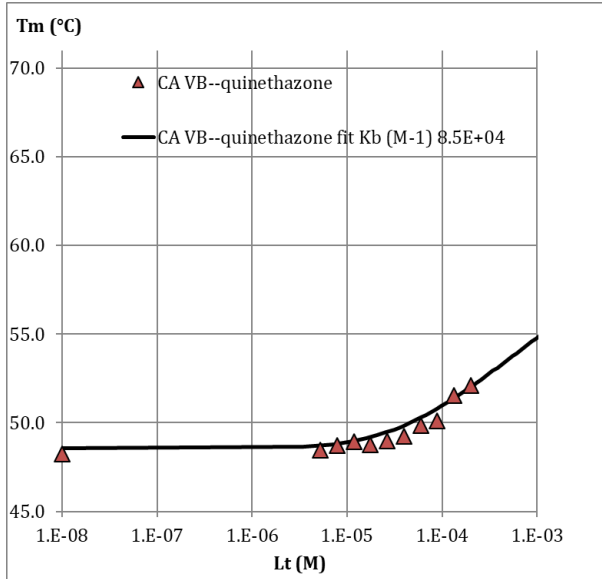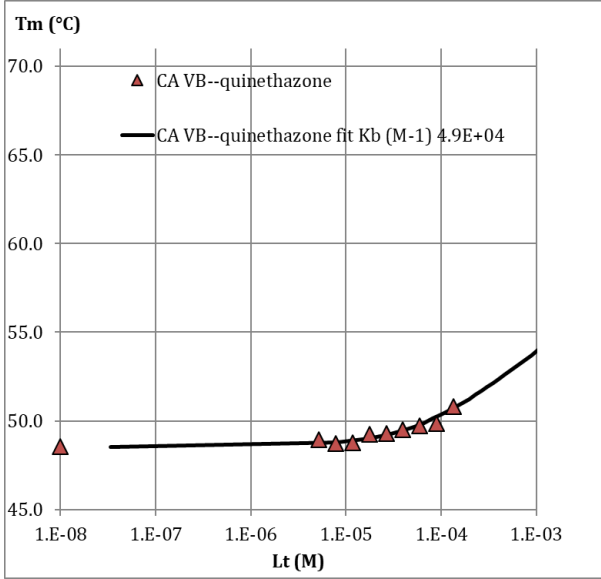

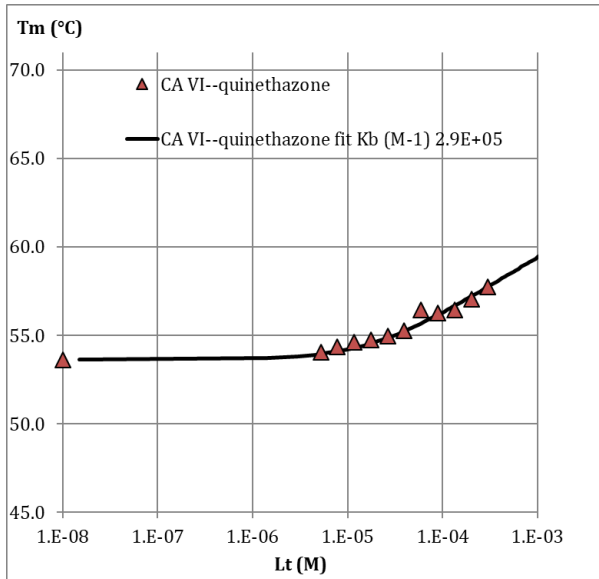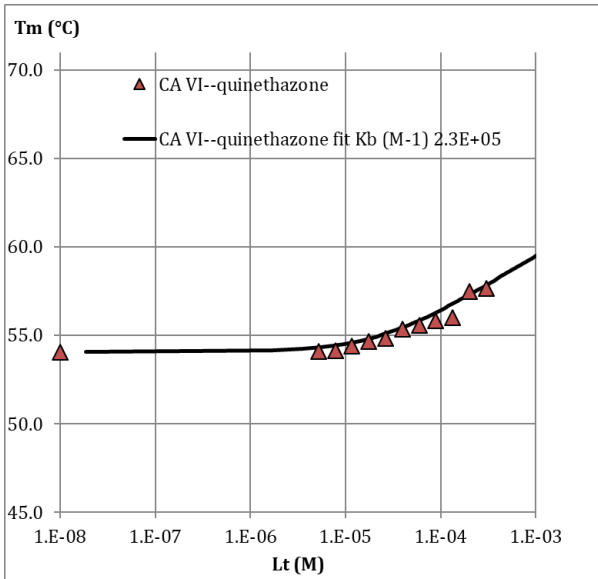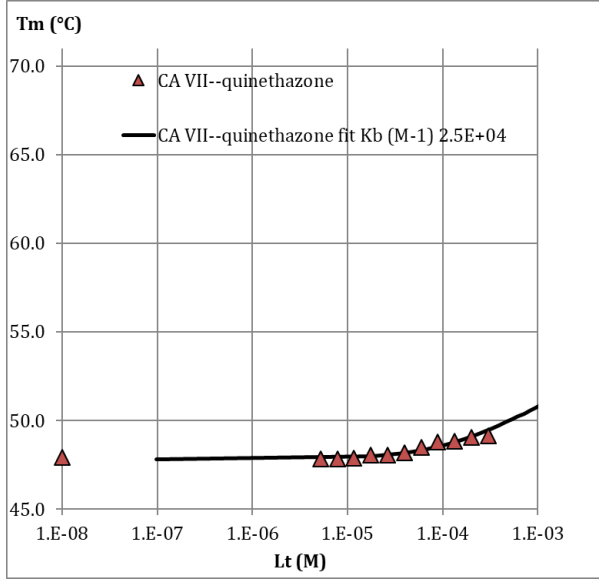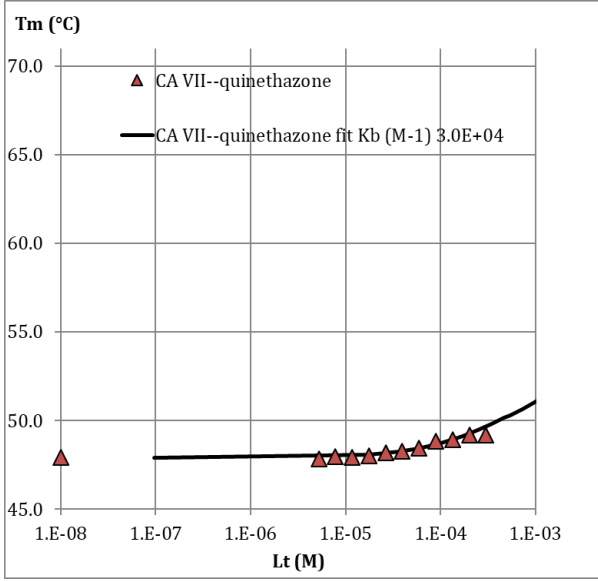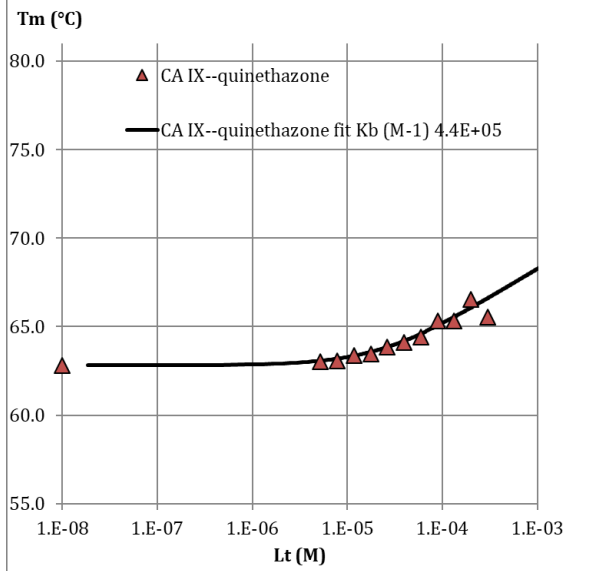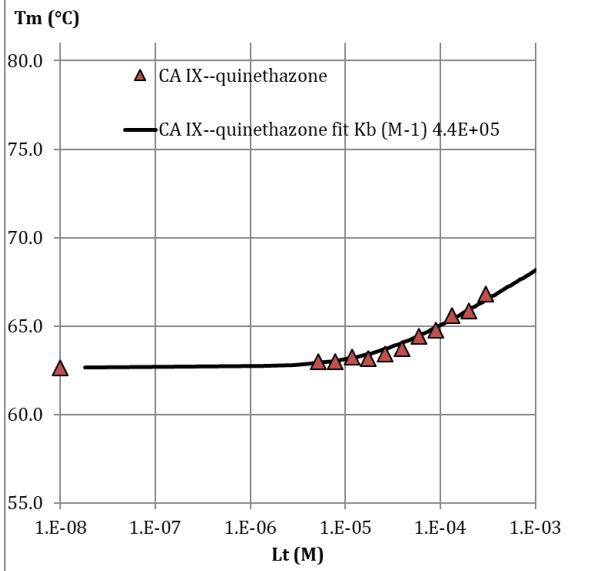

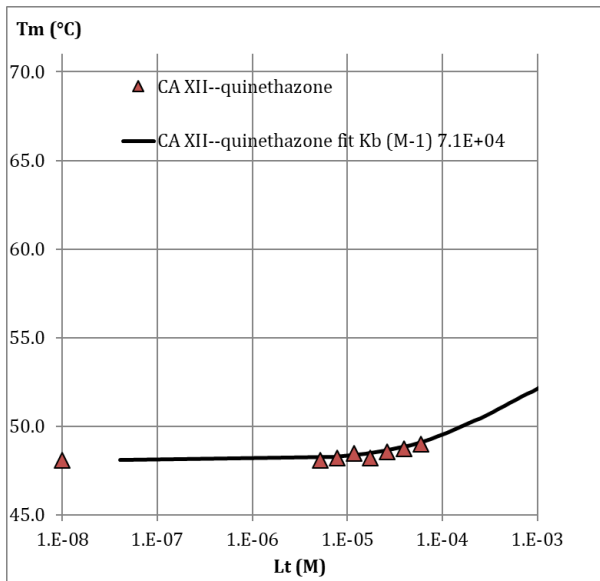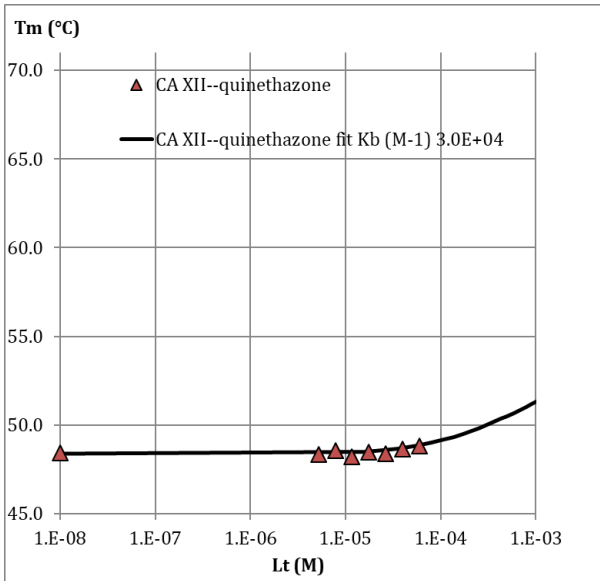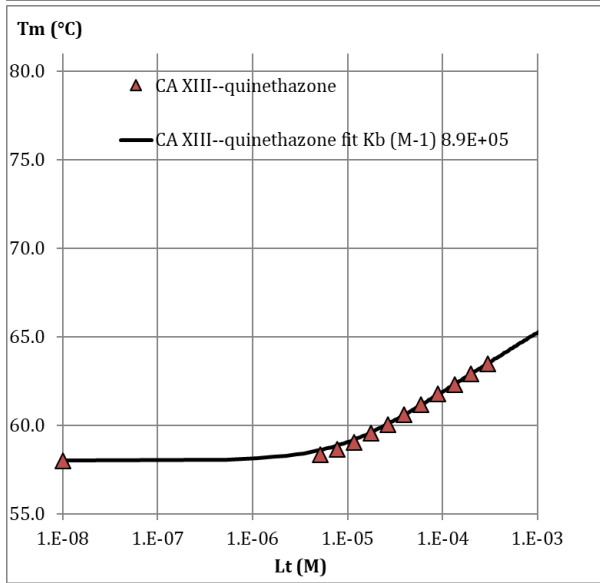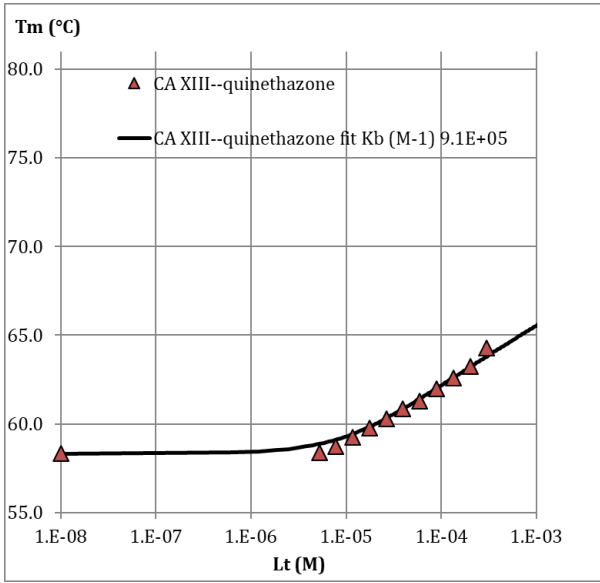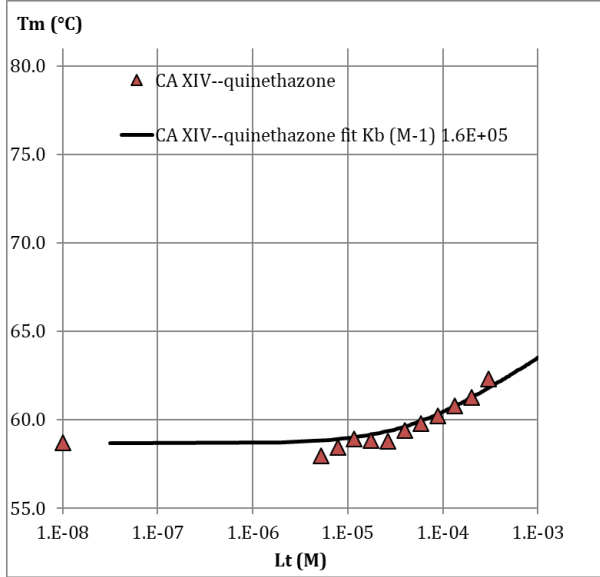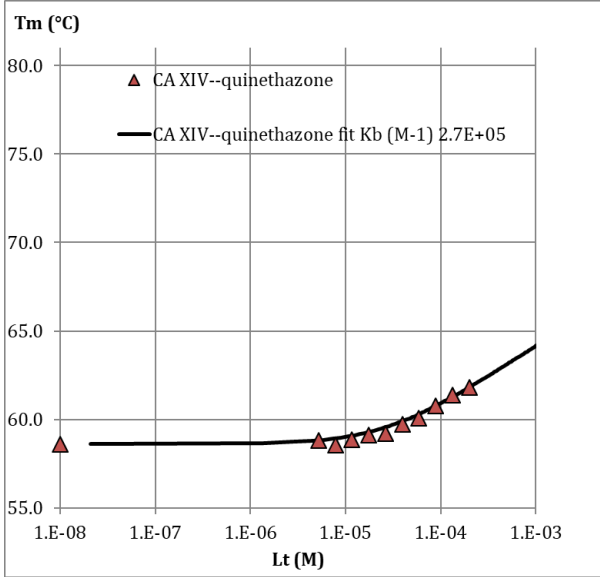

# 19. Fenquizone

## Fluorecence-based thermal shift assay

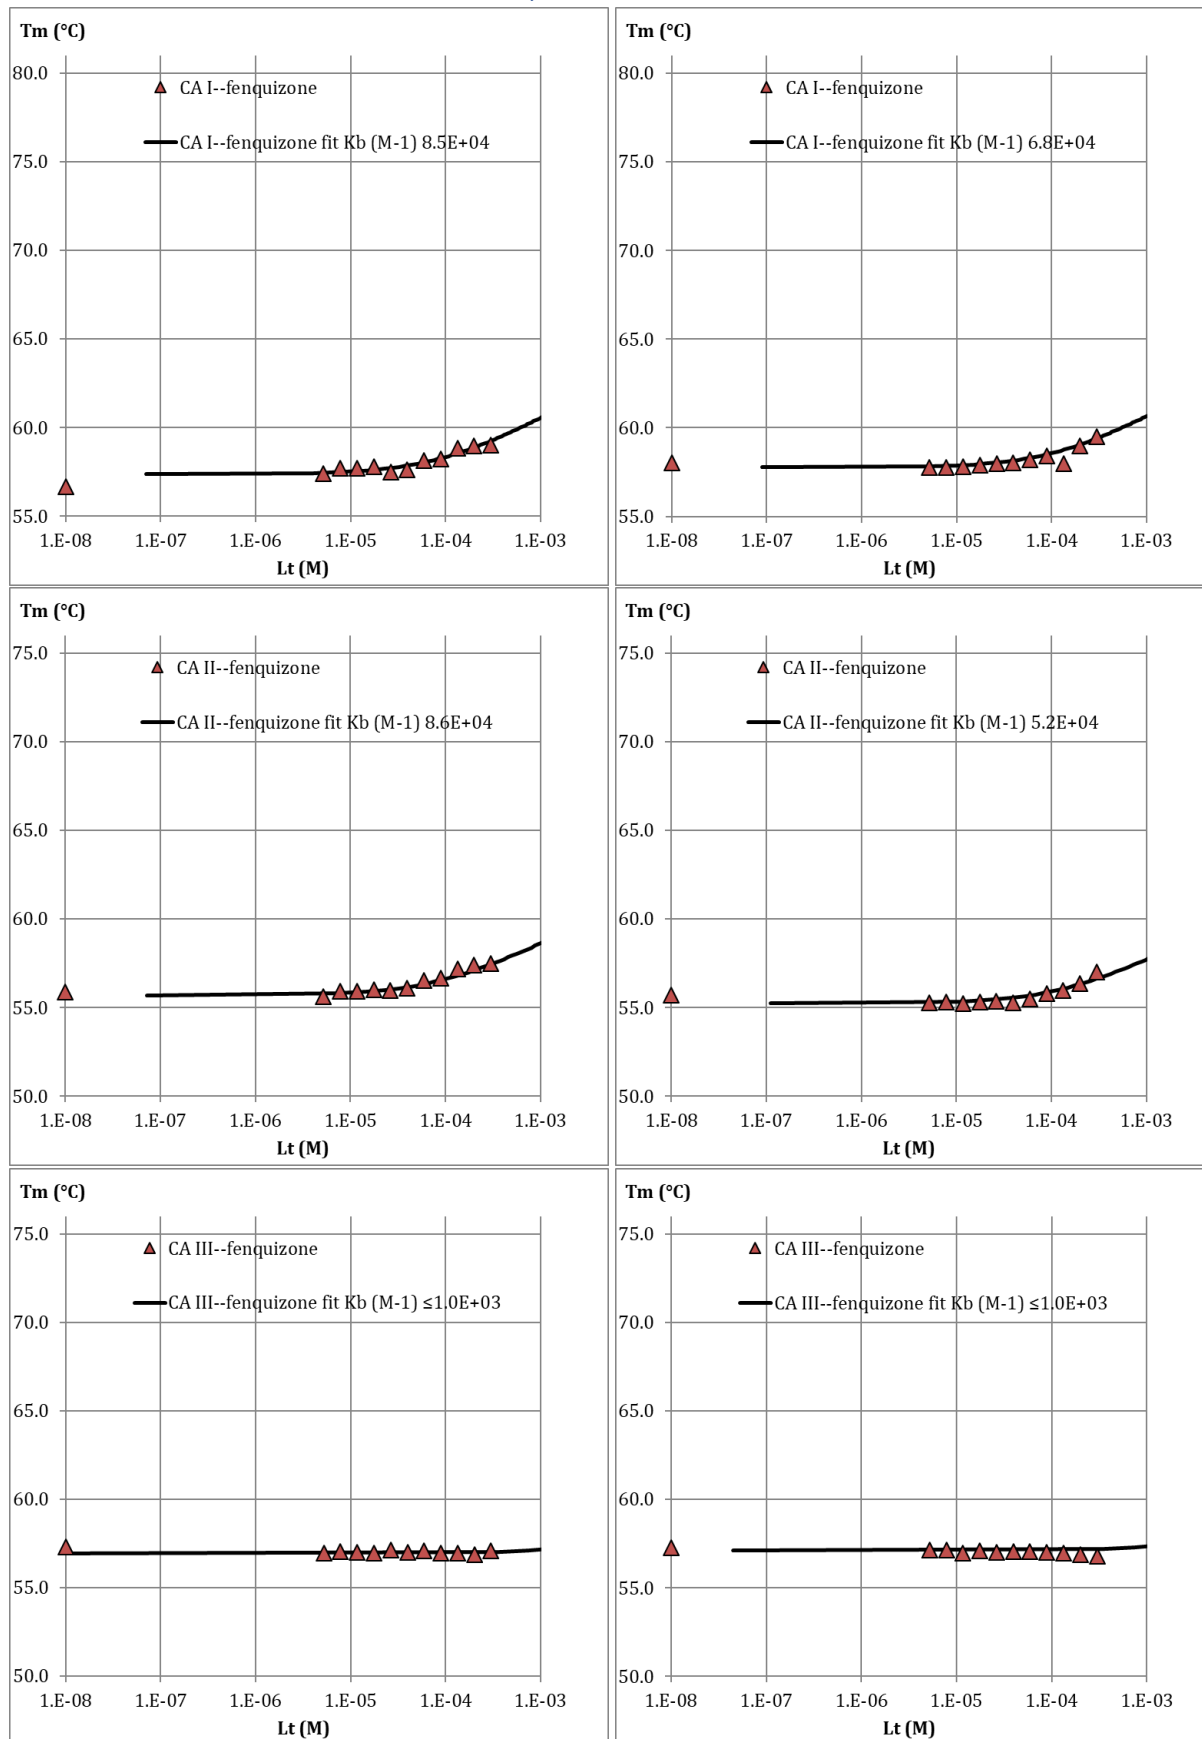

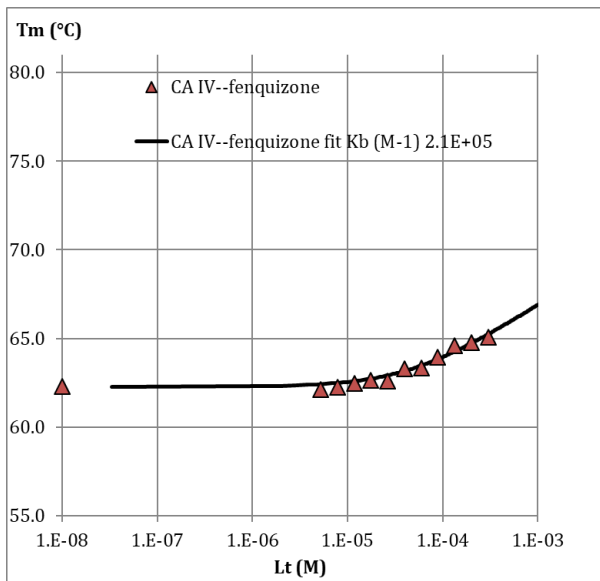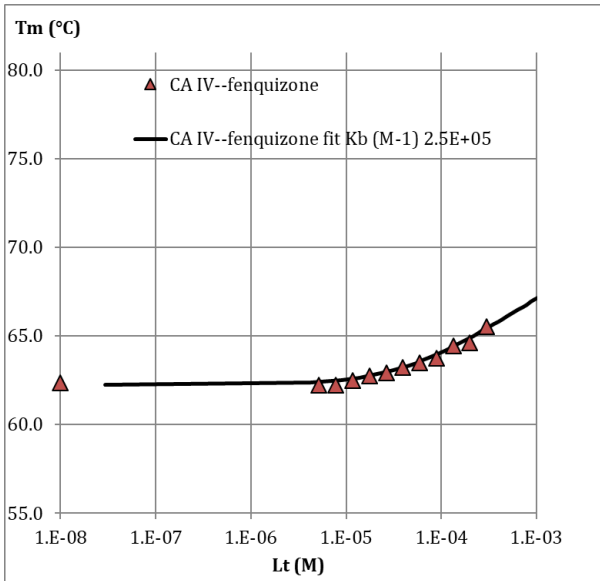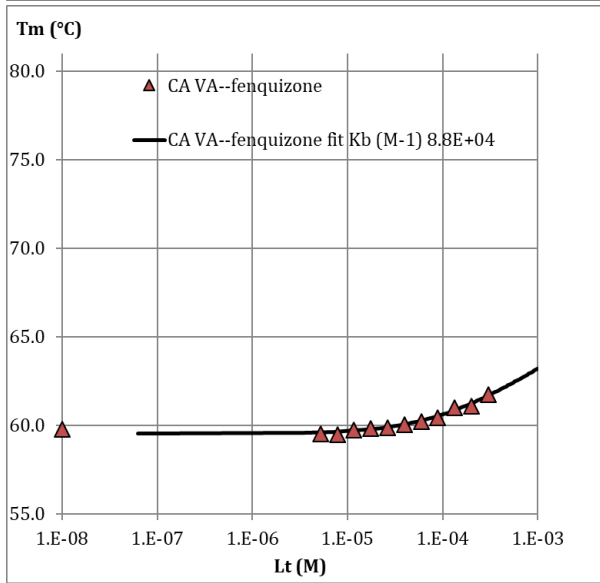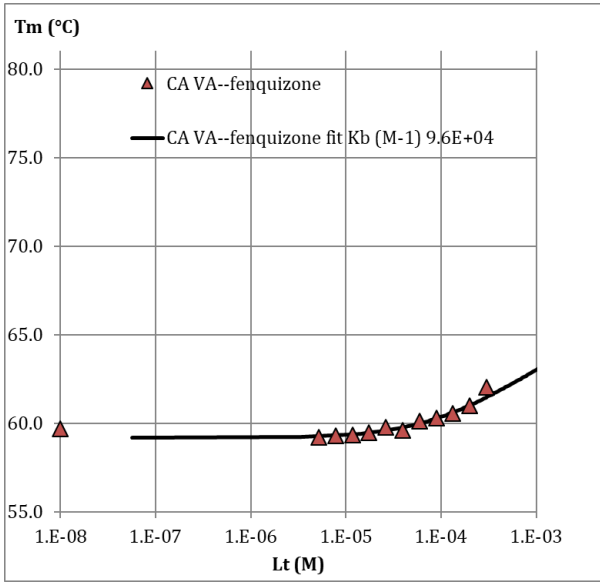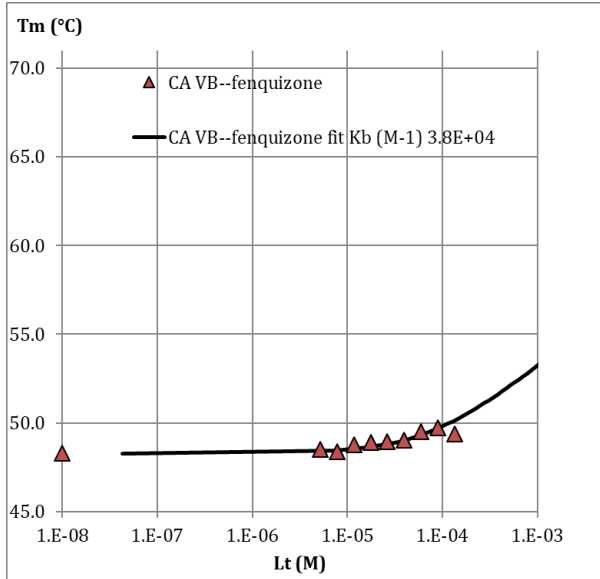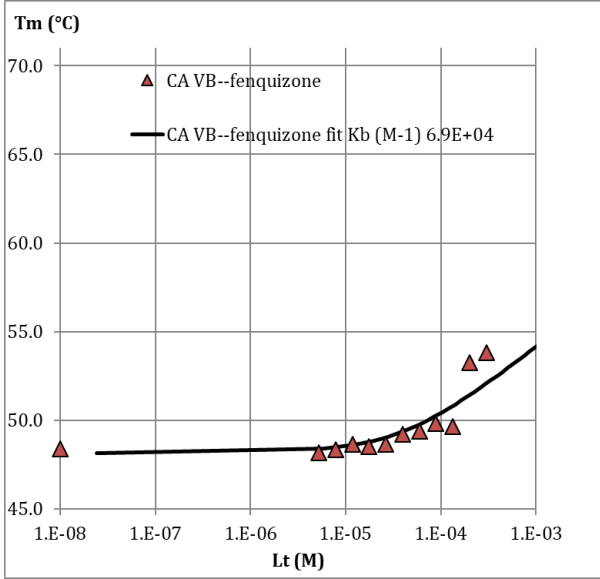

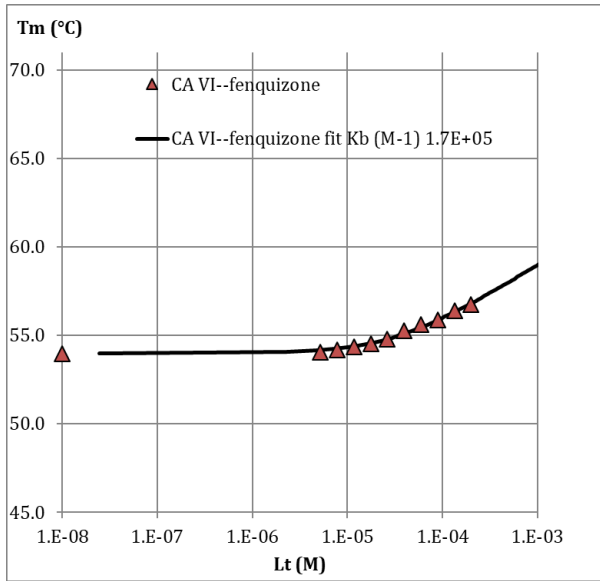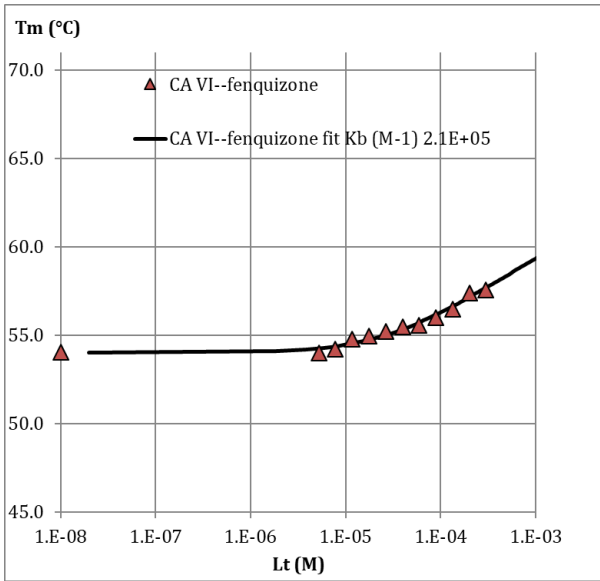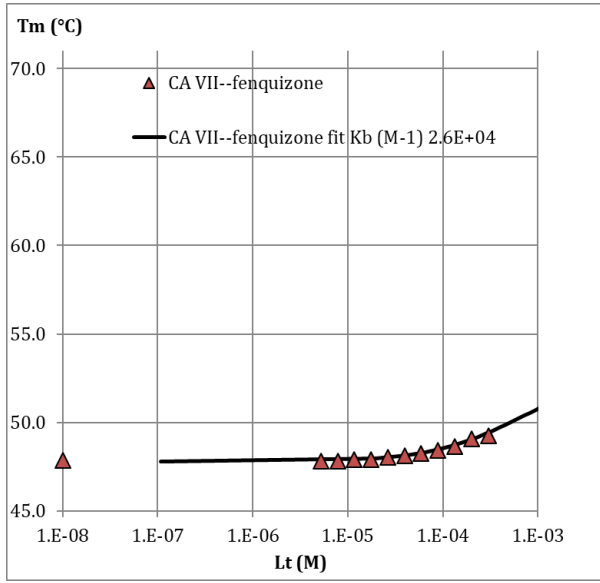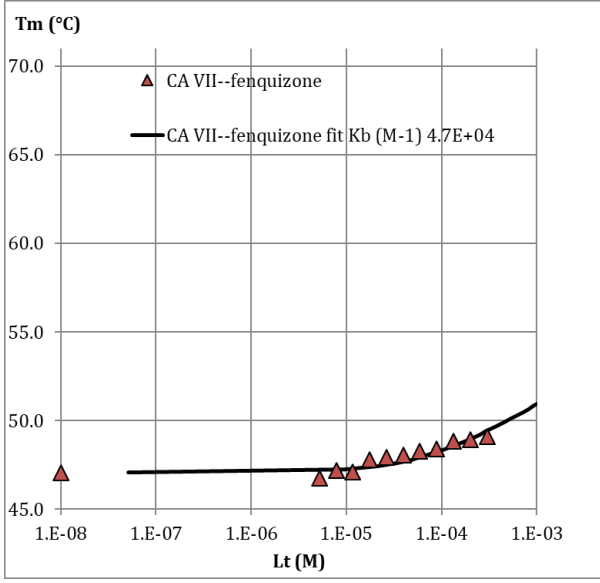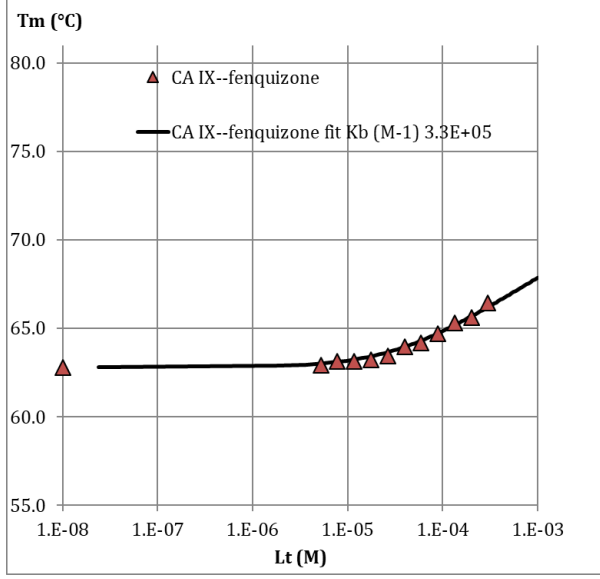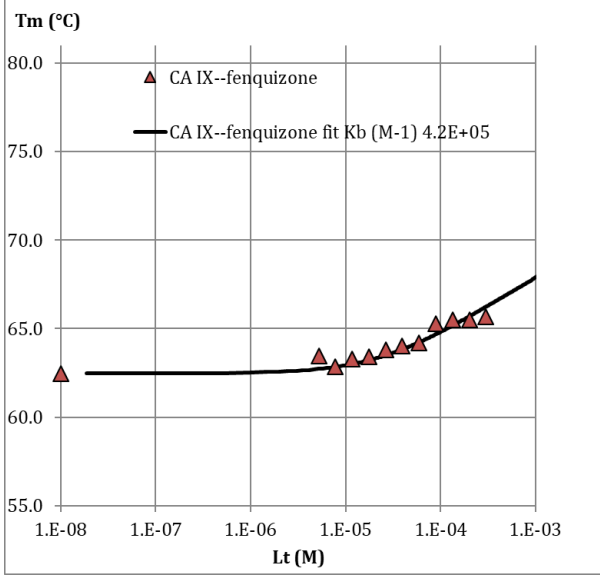

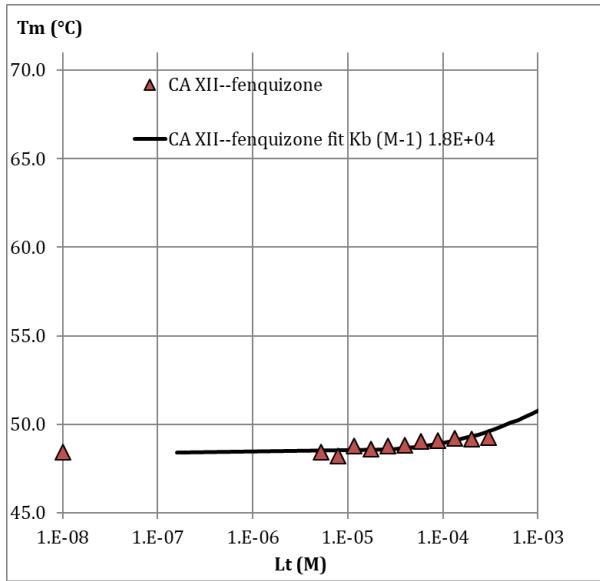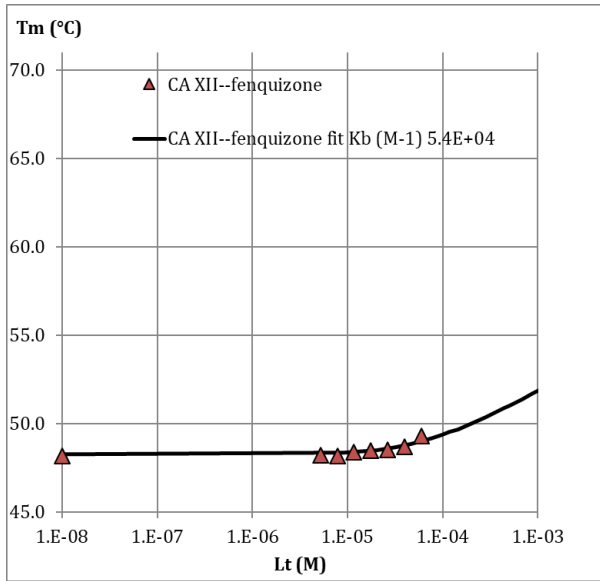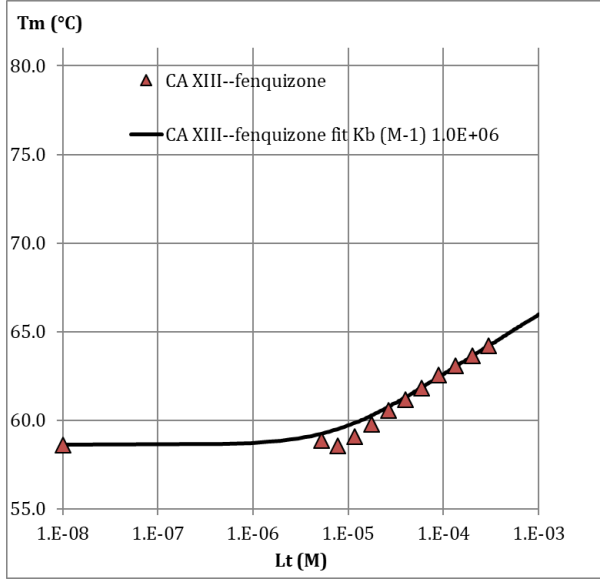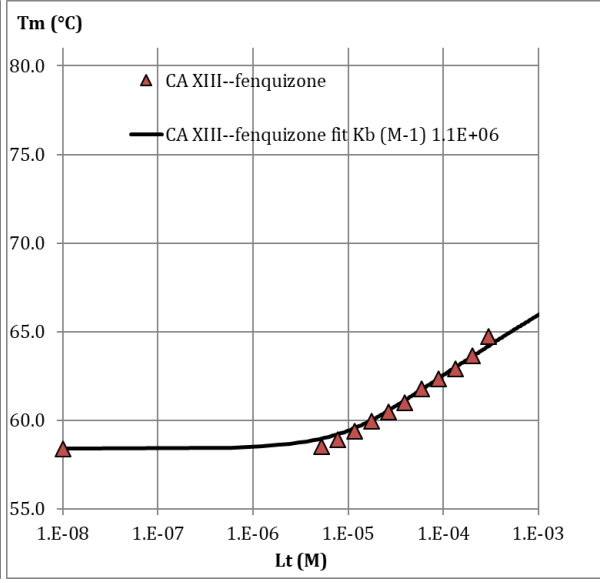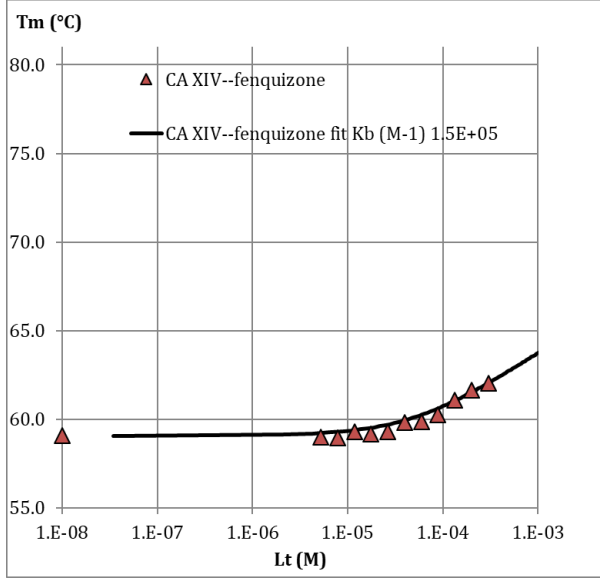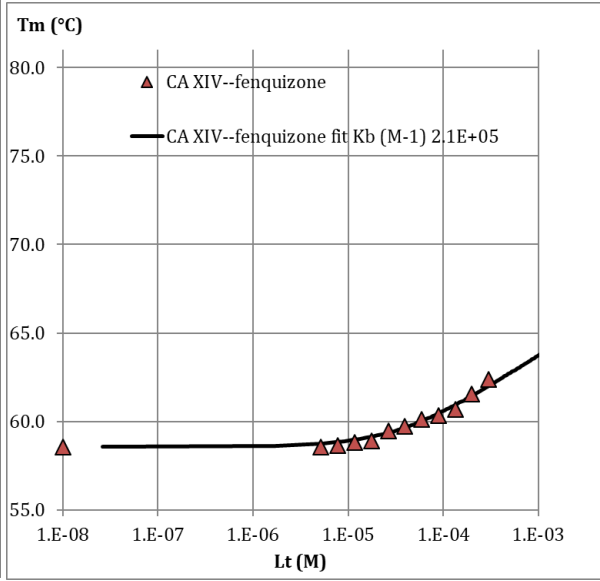

## 20. Metolazone

### Fluorecence-based thermal shift assay

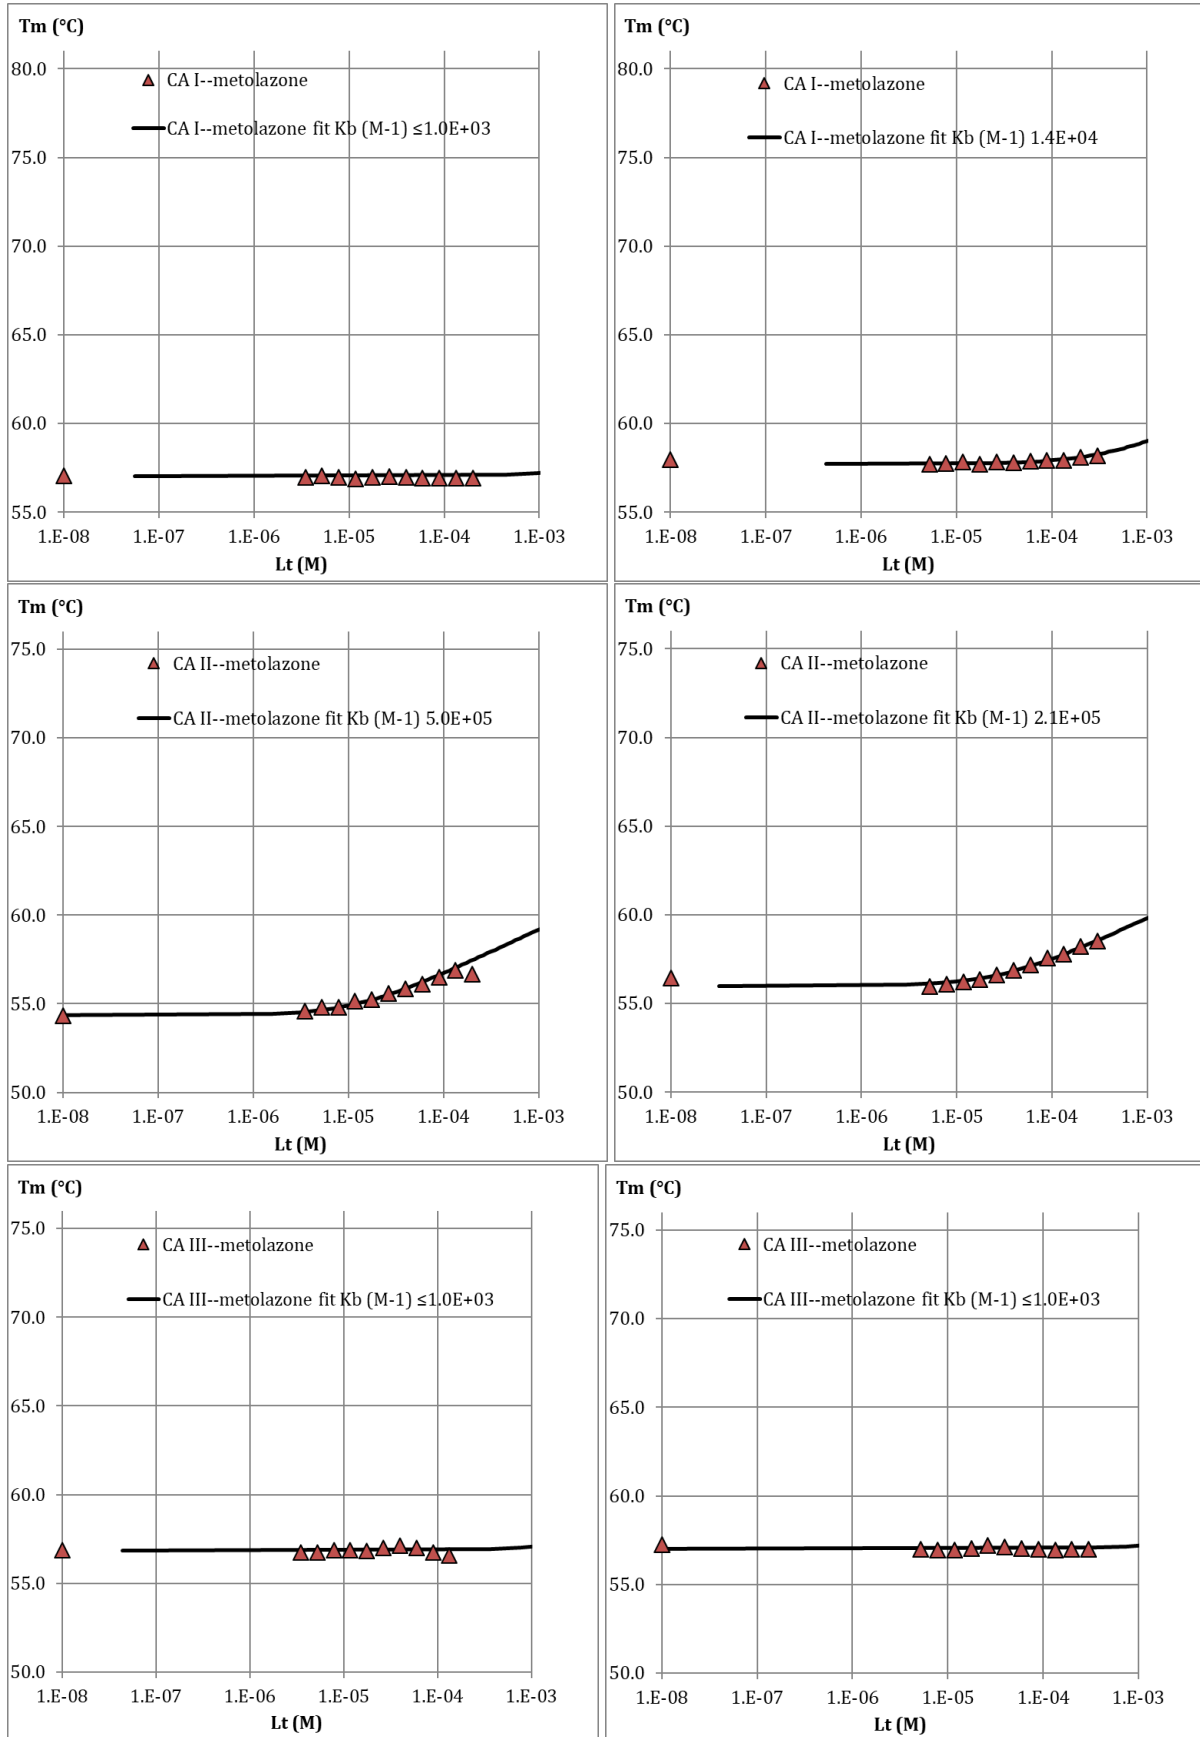



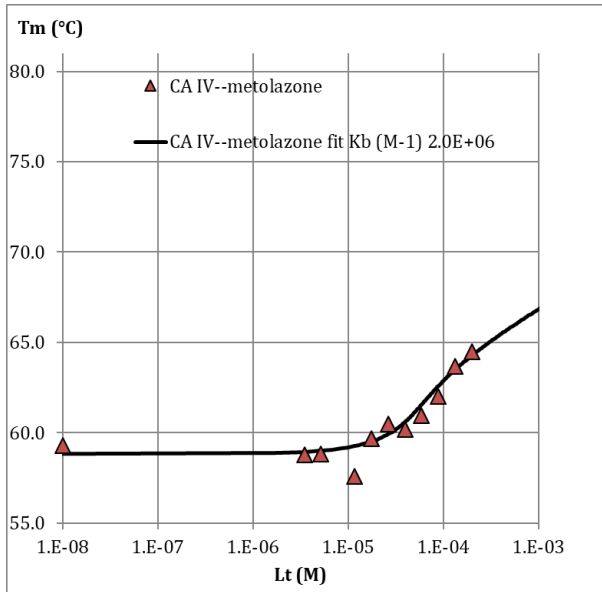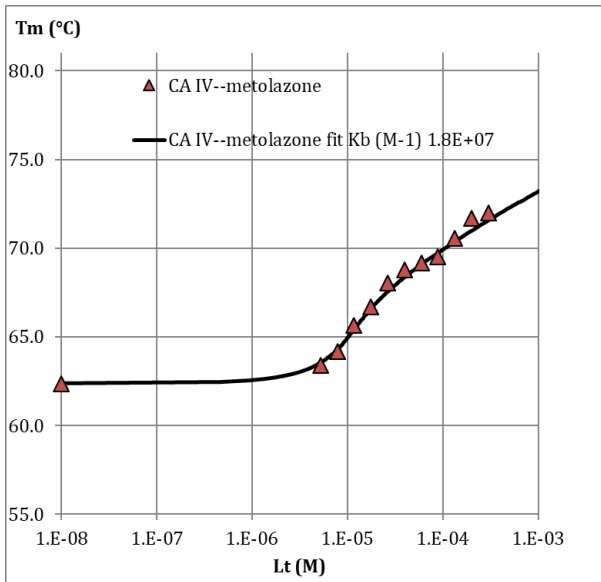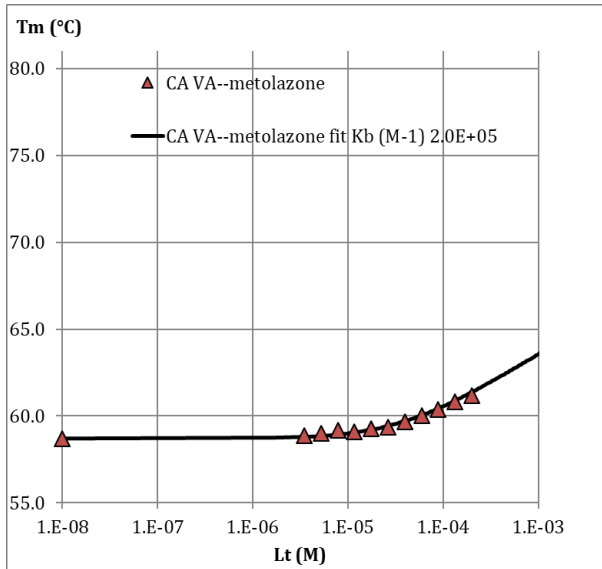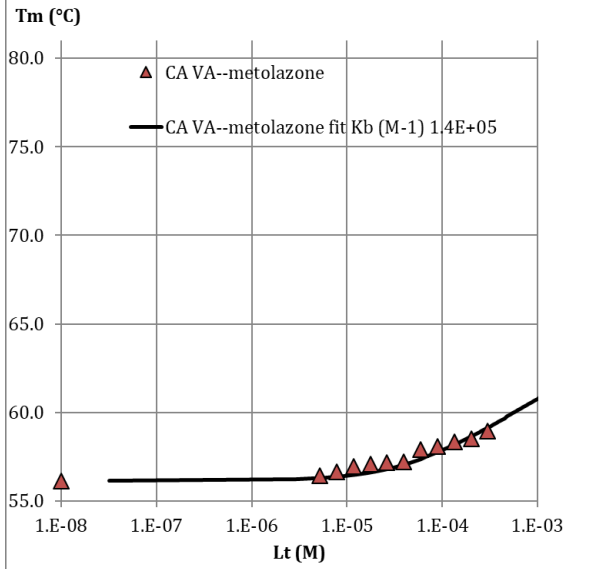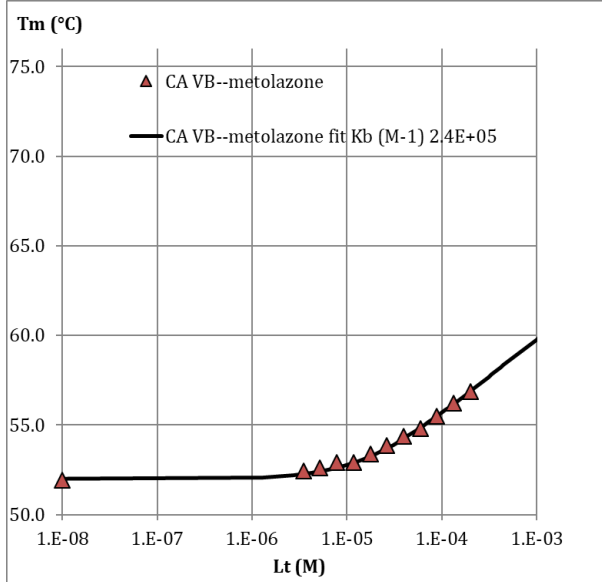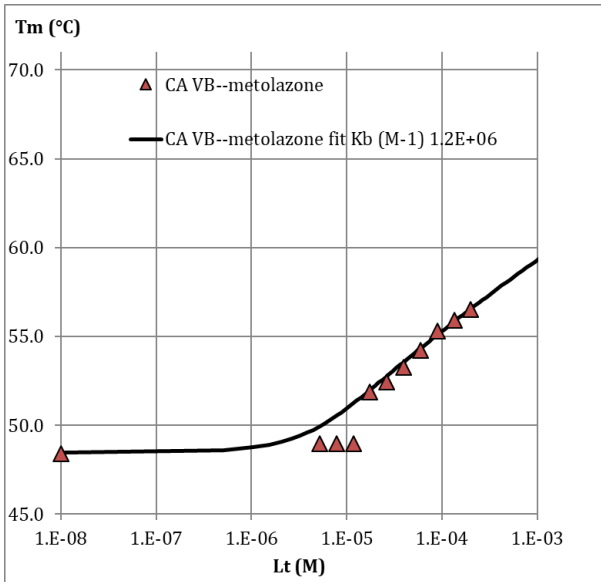

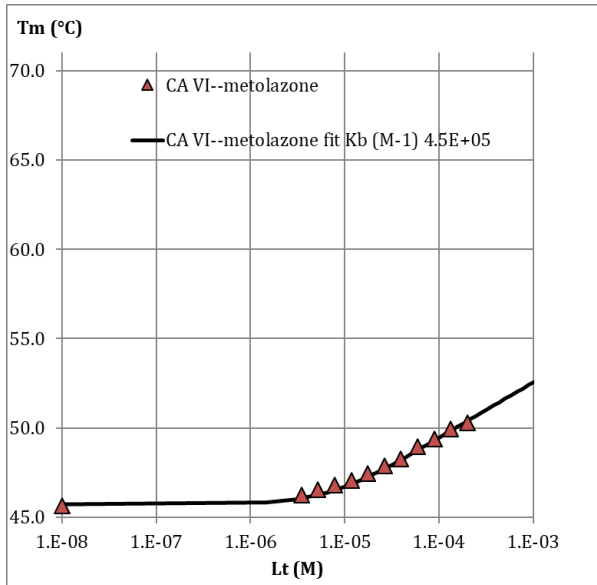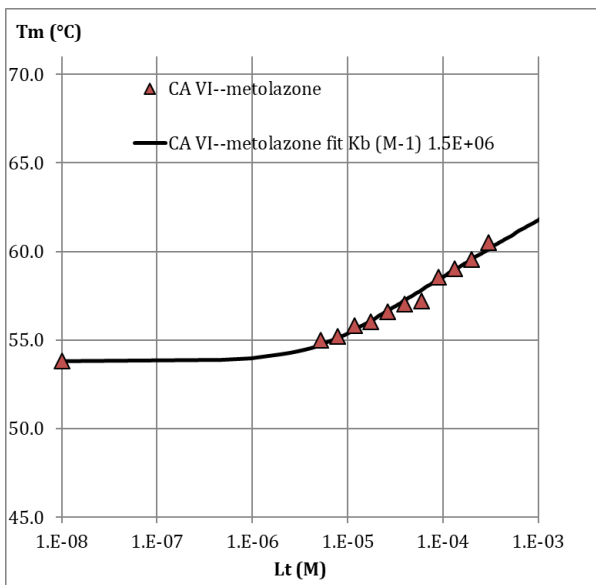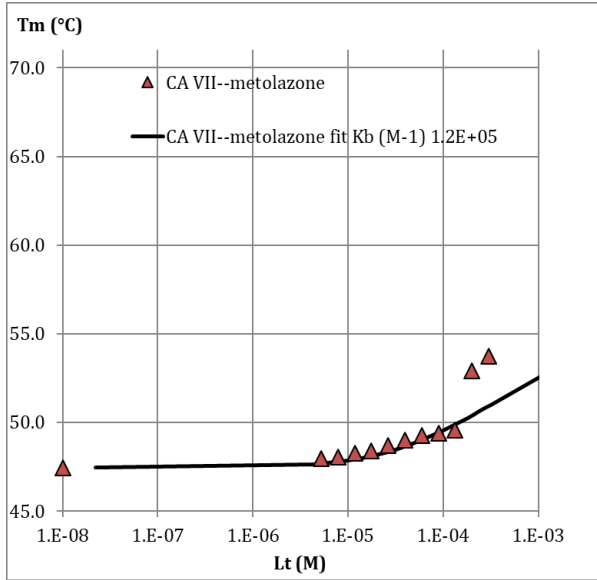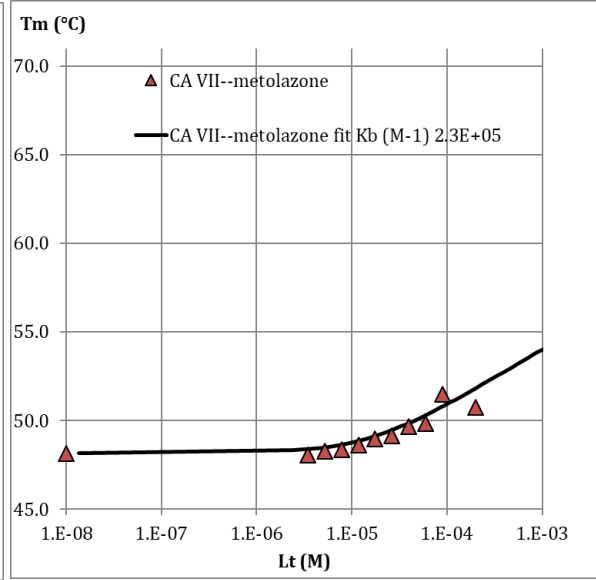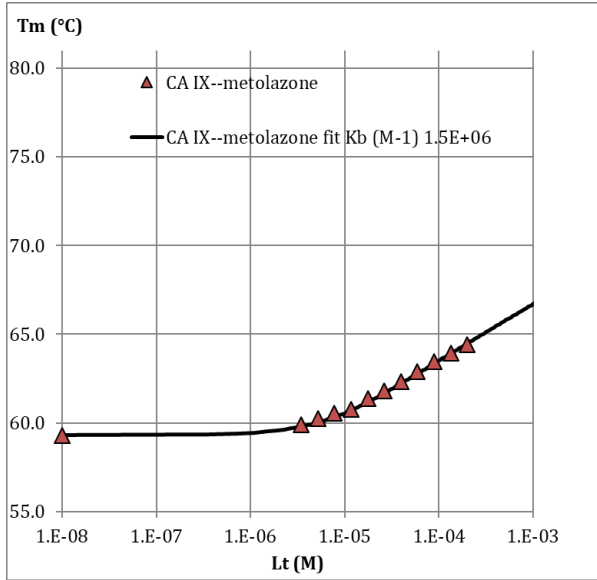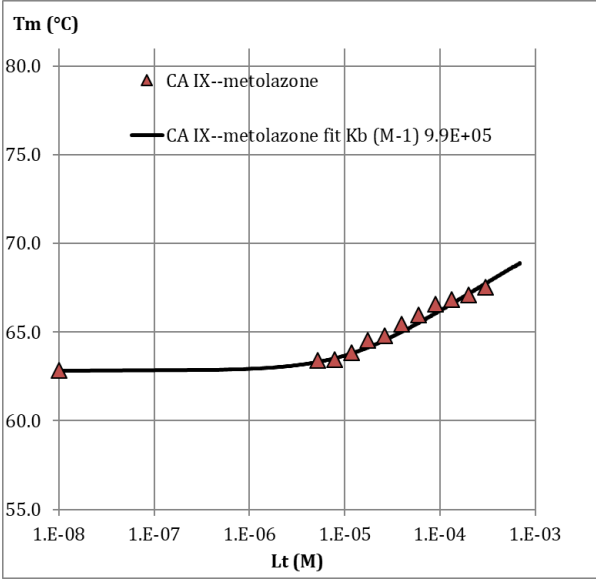

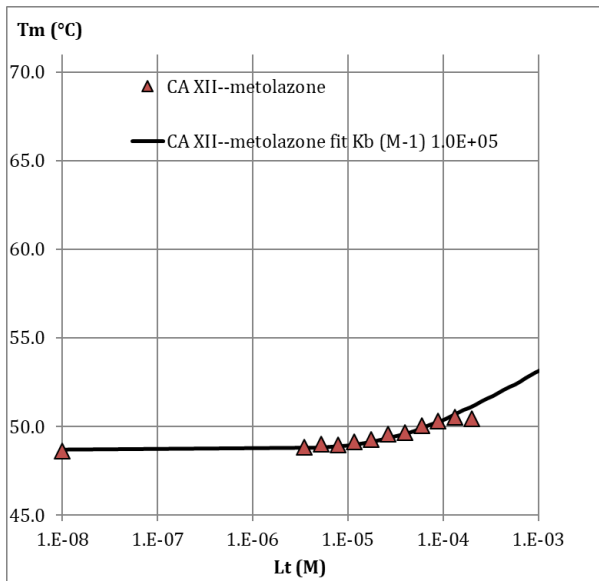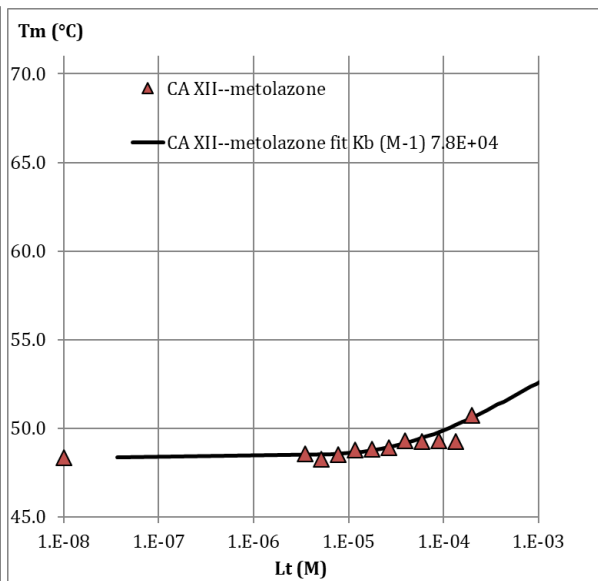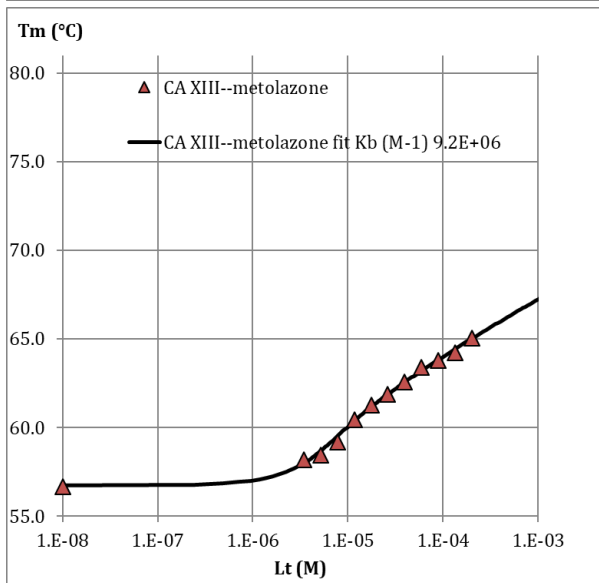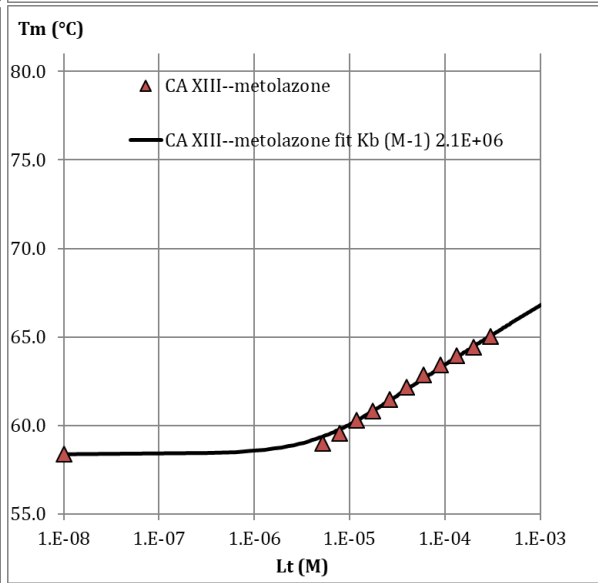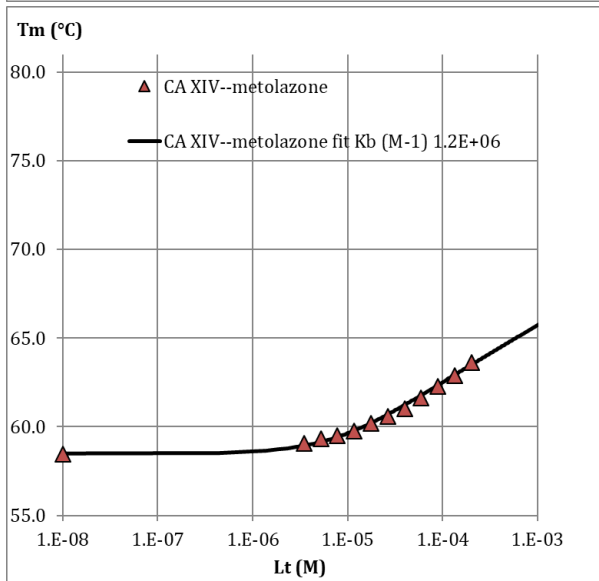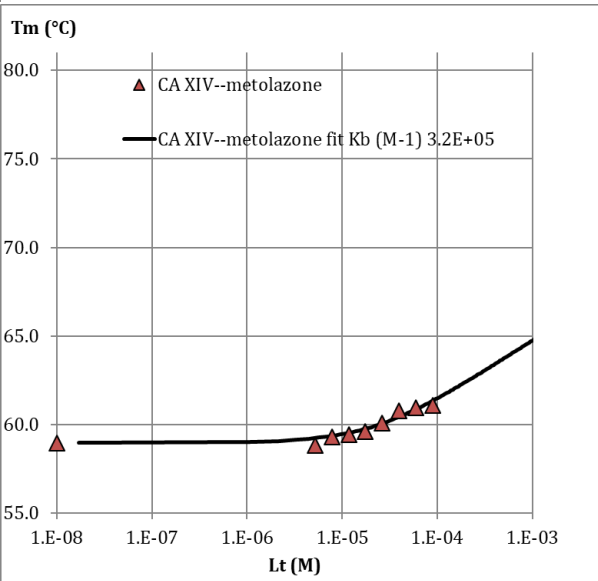

**Note:**  $T_m$  variations for the same protein depend on exact protein concentration in the experiment and vary within approx.  $\pm 3$  degrees, except for CA VI – in this case, protein preparations produced in bacterial (less stable) or eucaryotic (more stable) expression systems were used [1].

## Equations used to fit the fluorescence-based thermal shift assay (FTSA) data

Equations used to fit the fluorescent thermal shift assay (FTSA) data are provided in this section describe the model for ligand-induced protein stabilization against thermal denaturation. Fluorescence yield,  $f$ , upon protein unfolding is

$$f = f_N X_N + f_U X_U, \quad (1)$$

where  $f_N$  and  $X_N$  are the fluorescence yield and fraction of the native form of a protein,  $f_U$  and  $X_U$  are those of the unfolded form. We consider native (N) and unfolded (U) states of a protein. The molar fractions of native and unfolded protein

$$X_N = \frac{[N]}{[N] + [U]}, \quad (2)$$

$$X_U = \frac{[U]}{[N] + [U]} \quad (3)$$

allow to obtain the following equation of fluorescence yield:

$$f = f_N + \frac{f_U - f_N}{1 + \frac{[N]}{[U]}}. \quad (4)$$

The fluorescence yields in the native and unfolded states are usually temperature-dependent and can be approximated by linear equations:

$$f_N = f_{N,T_m} + m_N(T - T_m), \quad (5)$$

$$f_U = f_{U,T_m} + m_U(T - T_m), \quad (6)$$

where  $m_N$  and  $m_U$  are slopes in the pre- and post-transition states, while  $f_{N,T_m}$  and  $f_{U,T_m}$  are the levels of fluorescence yields of the native and unfolded protein states at the melting temperature,  $T_m$ . Substituting  $f_N$  and  $f_U$  terms in Equation (4) by their temperature dependencies (Equations (5) and (6)) we obtain the final equation for the fluorescence yield:

$$f = f_{N,T_m} + m_N(T - T_m) + \frac{f_{U,T_m} - f_{N,T_m} + (m_U - m_N)(T - T_m)}{1 + \frac{[N]}{[U]}}. \quad (7)$$

In the Fluorescent Thermal Shift Assay (FTSA), a protein stabilization is described by the shift in its melting temperature upon addition of a ligand. Mathematically this phenomenon requires the equation that relates the concentration of added ligand with the changes in the Gibbs energy, enthalpy, and entropy of protein unfolding and protein-ligand binding. To derive this relationship, we start with four equations:

$$[P]_t = [N] + [P \cdot L] + [U], \quad (8)$$

$$[L]_t = [L] + [P \cdot L], \quad (9)$$

$$K_U = \frac{[U]}{[N]}, \quad (10)$$

$$K_b = \frac{[P \cdot L]}{[N][L]}, \quad (11)$$

where  $K_U$  and  $K_b$  are equilibrium constants of protein unfolding and protein-ligand binding, respectively;  $[P \cdot L]$ ,  $[P]_t$  and  $[L]_t$  denotes the molar concentrations of protein-ligand complex, initial protein

and initial ligand, respectively. Unbound ligand molarity,  $[L]$ , in the Equation (9) can be substituted by  $[L] = \frac{[P \cdot L]}{K_b[N]}$  from Equation (11). We also make use of the relation  $[N] = \frac{[U]}{K_U}$  from Equation (10), which leads to

$$[L]_t = \frac{K_U[P \cdot L]}{K_b[U]} + [P \cdot L] = [P \cdot L] \left( \frac{K_U}{K_b[U]} + 1 \right). \quad (12)$$

Equations (8) and (10) are combined to obtain the molarity of protein-ligand complex

$$[P \cdot L] = [P]_t - [U] - \frac{[U]}{K_U}. \quad (13)$$

Writing the  $[P \cdot L]$  term into Equation (12) results in:

$$[L]_t = \left( [P]_t - [U] - \frac{[U]}{K_U} \right) \left( \frac{K_U}{K_b[U]} + 1 \right). \quad (14)$$

We describe the temperature dependencies of equilibrium constants  $K_U$  and  $K_b$  in terms of the standard Gibbs energies of protein unfolding,  $\Delta G_U^\circ$ , and protein–ligand binding,  $\Delta G_b^\circ$ :

$$K_U(T) = \exp\left(-\frac{\Delta G_U^\circ}{RT}\right), \quad (15)$$

$$K_b(T) = \exp\left(-\frac{\Delta G_b^\circ}{RT}\right), \quad (16)$$

where  $R$  is the molar gas constant. The change in Gibbs energy has two constituent parts: enthalpy ( $\Delta H$ ) and entropy ( $\Delta S$ ). Both terms are temperature-dependent and their standard values at a particular temperature,  $T$ , can be calculated using equations

$$\Delta H_x^\circ = \Delta H_{x,T_r}^\circ + \int_{T_r}^T \Delta C_{p,x} dT, \quad (17)$$

$$\Delta S_x^\circ = \Delta S_{x,T_r}^\circ + \int_{T_r}^T \left( \frac{\Delta C_{p,x}}{T} \right) dT, \quad (18)$$

where  $T_r$  is a reference (initial) temperature,  $\Delta H_{x,T_r}^\circ$  and  $\Delta S_{x,T_r}^\circ$  – standard enthalpy and entropy at  $T_r$ ,  $\Delta C_{p,x}$  – the change in constant pressure heat capacity. The subscript  $x$  in Equations (17) and (18) stands for either unfolding or binding process. If  $\Delta C_p$  is constant in the temperature range from  $T_r$  to  $T_m$ , we can integrate Equations (17) and (18) and the resulting Gibbs energy is

$$\begin{aligned} \Delta G_x^\circ &= \Delta H_x^\circ - T_m \Delta S_x^\circ = \\ &= \Delta H_{x,T_r}^\circ + \Delta C_{p,x}(T_m - T_r) - T_m \left( \Delta S_{x,T_r}^\circ + \Delta C_{p,x} \ln \frac{T_m}{T_r} \right). \end{aligned} \quad (19)$$

Folded and unfolded fractions of a protein are equal at melting temperature ( $[U] = \frac{[P]_t}{2}$  at  $T_m$ ), thus Equation (14) simplifies, and together with Equations (15) and (16) provides the mathematical background of the FTSA:

$$\left\{ \begin{array}{l} [L]_t = (K_U - 1) \left( \frac{1}{K_b} + \frac{[P]_t}{2K_U} \right), \\ K_U = \exp \left( -\frac{\Delta H_{U,T_r}^\circ + \Delta C_{p,U}(T_m - T_r) - T_m \left( \Delta S_{U,T_r}^\circ + \Delta C_{p,U} \ln \frac{T_m}{T_r} \right)}{RT_m} \right), \\ K_b = \exp \left( -\frac{\Delta H_{b,T_0}^\circ + \Delta C_{p,b}(T_m - T_0) - T_m \left( \Delta S_{b,T_0}^\circ + \Delta C_{p,b} \ln \frac{T_m}{T_0} \right)}{RT_m} \right). \end{array} \right. \quad (20)$$

## Equation used to fit stopped-flow enzymatic inhibition assay (SFA) data

This equation is also known as Morrison's equation [2,3] or Greco & Hakala equation [4,5], which is used when enzyme concentration in the assay is comparable with inhibition constant, as is in the case of carbonic anhydrase inhibition:

$$CA \text{ activity} = 1 - \frac{([CA] + [I] + K_d) - \sqrt{([CA] + [I] + K_d)^2 - 4[CA][I]}}{2[CA]}$$

Where [CA] is the total concentration of CA, [I] is the total concentration of added inhibitor, and  $K_d$  is the apparent inhibition constant, which is equal to the protein – ligand dissociation constant in 1:1 binding model.

## References

1. Kazokaitė J, Kairys V, Smirnovienė J, Smirnov A, Manakova E, Tolvanen M, et al. Engineered Carbonic Anhydrase VI-Mimic Enzyme Switched the Structure and Affinities of Inhibitors. *Sci Rep.* 2019;9: 12710. doi:10.1038/s41598-019-49094-0
2. Morrison JF. Kinetics of the reversible inhibition of enzyme-catalysed reactions by tight-binding inhibitors. *Biochim Biophys Acta BBA - Enzymol.* 1969;185: 269–286. doi:10.1016/0005-2744(69)90420-3
3. Copeland. *Evaluation of Enzyme Inhibitors in Drug Discovery a Guide for Medicinal Chemists and Pharmacologists.* JOHN WILEY & SONS, INC.; 2013.
4. Greco WR, Hakala MT. Evaluation of methods for estimating the dissociation constant of tight binding enzyme inhibitors. *J Biol Chem.* 1979;254: 12104–12109.
5. Kuzmic P. History, variants and usage of the “Morrison equation” in enzyme inhibition kinetics, BioKin Technical Note TN-2015-01, BioKin Ltd., Watertown MA, [Online] [www.biokin.com/TN/2015/01](http://www.biokin.com/TN/2015/01). 2015 [cited 12 Oct 2018]. Available: <http://www.biokin.com/publications/technotes/TN201501.html>
